# Supplementary material for: Antimicrobial resistance and plasmid-associated virulence genes in Salmonella isolated from pigs, pork, and humans in border provinces of Thailand and neighboring countries
Source: PeerJ. 2025 Aug 25;13:e19884. doi: 10.7717/peerj.19884 (PMC12393075; doi:10.7717/peerj.19884)
Supplement: Supplemental Information 1 [file peerj-13-19884-s001.xlsx]

## Sheet: ID_SA607
Isolate ID	SPI	Identity	Query / Template length	Contig	Position in contig	Organism	Insertion Site	Accession number
SA607	C63PI	99.12	4000 / 4000	1 length=4717634 depth=1.00x circular=true	1056823..1060822	Salmonella-enterica-Typhimurium-SL1344	fhlA	AF128999
	CS54_island	98.07	19752 / 25252	1 length=4717634 depth=1.00x circular=true	1300156..1319896	Salmonella-enterica-Typhimurium-ATCC_14028	xseA-yfgK	AF140550
	Not_named	100	330 / 330	1 length=4717634 depth=1.00x circular=true	2205062..2205391	Salmonella-enterica-Enteritidis-CMCC50041	-	JQ071613
	SPI-1	99.7	2705 / 2705	1 length=4717634 depth=1.00x circular=true	1053543..1056247	Salmonella-enterica-Typhimurium-SL1344	fhlA/mutS	AF148689
	SPI-1	99.77	439 / 440	1 length=4717634 depth=1.00x circular=true	1050454..1050892	Salmonella-enterica-Gallinarum-SGB_1	Not_published	AY956822
	SPI-1	99.77	430 / 430	1 length=4717634 depth=1.00x circular=true	1048354..1048783	Salmonella-enterica-Gallinarum-SGE_2	Not_published	AY956823
	SPI-1	100	470 / 470	1 length=4717634 depth=1.00x circular=true	1039605..1040074	Salmonella-enterica-Gallinarum-SGB_4	Not_published	AY956824
	SPI-1	100	415 / 415	1 length=4717634 depth=1.00x circular=true	1027873..1028287	Salmonella-enterica-Gallinarum-SGB_8	Not_published	AY956825
	SPI-1	98.07	259 / 257	1 length=4717634 depth=1.00x circular=true	1026735..1026993	Salmonella-enterica-Typhimurium-J4STEHO	-	JN982040
	SPI-1	98.48	3155 / 3141	1 length=4717634 depth=1.00x circular=true	1013902..1017054	Salmonella-enterica-Typhimurium-SL1344	fhlA/mutS	U16303
	SPI-10	99.28	553 / 554	1 length=4717634 depth=1.00x circular=true	4062371..4062923	Salmonella-enterica-Gallinarium-SGE_3	Not_published	AY956839
	SPI-12	97.94	9343 / 11075	1 length=4717634 depth=1.00x circular=true	1605992..1615330	Salmonella-enterica-Choleraesuis-SC_B67	tRNA-pro	NC_006905
	SPI-13	99.41	338 / 338	1 length=4717634 depth=1.00x circular=true	783688..784025	Salmonella-enterica-Gallinarum-SGD_3	tRNA-pheV	AY956832
	SPI-13	100	341 / 341	1 length=4717634 depth=1.00x circular=true	786104..786444	Salmonella-enterica-Gallinarum-SGA_10	tRNA-pheV	AY956834
	SPI-14	99.8	501 / 501	1 length=4717634 depth=1.00x circular=true	3065366..3065866	Salmonella-enterica-Gallinarum-SGA_8	Not_published	AY956835
	SPI-14	99.55	441 / 441	1 length=4717634 depth=1.00x circular=true	3059845..3060285	Salmonella-enterica-Gallinarum-SGC_8	Not_published	AY956836
	SPI-2	99.37	637 / 637	1 length=4717634 depth=1.00x circular=true	2219274..2219910	Salmonella-enterica-Gallinarum-SGB_10	tRNA-valV	AY956826
	SPI-2	100	642 / 642	1 length=4717634 depth=1.00x circular=true	2211964..2212605	Salmonella-enterica-Gallinarum-SGC_2	tRNA-valV	AY956827
	SPI-2	100	395 / 396	1 length=4717634 depth=1.00x circular=true	2216597..2216991	Salmonella-enterica-Gallinarum-SGC_9	tRNA-valV	AY956828
	SPI-2	100	425 / 425	1 length=4717634 depth=1.00x circular=true	2209939..2210363	Salmonella-enterica-Gallinarum-SGH_1	tRNA-valV	AY956829
	SPI-2	98.9	547 / 547	1 length=4717634 depth=1.00x circular=true	2199863..2200409	Salmonella-enterica-Gallinarum-SGD_8	tRNA-valV	AY956830
	SPI-2	100	384 / 384	1 length=4717634 depth=1.00x circular=true	2202324..2202707	Salmonella-enterica-Enteritidis-Se11	-	JN673270
	SPI-2	100	384 / 384	1 length=4717634 depth=1.00x circular=true	2202324..2202707	Salmonella-enterica-Enteritidis-C50041	-	JN673273
	SPI-2	99.05	4633 / 4631	1 length=4717634 depth=1.00x circular=true	2181909..2186536	Salmonella-enterica-Typhimurium-LT2	tRNA-valV	X99945
	SPI-2	99.2	1252 / 1252	1 length=4717634 depth=1.00x circular=true	2198283..2199534	Salmonella-enterica-Typhimurium-	tRNA-valV	Z95891
	SPI-3	99.05	738 / 738	1 length=4717634 depth=1.00x circular=true	73032..73769	Salmonella-enterica-Typhimurium-14028s	tRNA_selC	AJ000509
	SPI-3	98.94	1514 / 1514	1 length=4717634 depth=1.00x circular=true	89728..91241	Salmonella-enterica-Typhimurium-14028s	tRNA_selC	Y13864
	SPI-4	98.89	26700 / 26698	1 length=4717634 depth=1.00x circular=true	4275810..4302508	Salmonella-enterica-Choleraesuis-SC_B67	ssb-soxSR	NC_006905
	SPI-5	99.08	9069 / 9069	1 length=4717634 depth=1.00x circular=true	2889245..2898309	Salmonella-Typhimurium-LT2	tRNA-serT	NC_003197
	SPI-9	98.56	12647 / 15696	1 length=4717634 depth=1.00x circular=true	1155692..1168338	Salmonella-Typhi-CT18	Not_published	NC_003198

## Sheet: ID_608
Isolate ID	SPI	Identity	Query / Template length	Contig	Position in contig	Organism	Insertion Site	Accession number
SA608	C63PI	99.12	4000 / 4000	1 length=4717402 depth=1.00x circular=true	1056823..1060822	Salmonella-enterica-Typhimurium-SL1344	fhlA	AF128999
	CS54_island	98.07	19752 / 25252	1 length=4717402 depth=1.00x circular=true	1300156..1319896	Salmonella-enterica-Typhimurium-ATCC_14028	xseA-yfgK	AF140550
	Not_named	100	330 / 330	1 length=4717402 depth=1.00x circular=true	2205062..2205391	Salmonella-enterica-Enteritidis-CMCC50041	-	JQ071613
	SPI-1	99.67	2705 / 2705	1 length=4717402 depth=1.00x circular=true	1053543..1056247	Salmonella-enterica-Typhimurium-SL1344	fhlA/mutS	AF148689
	SPI-1	99.77	439 / 440	1 length=4717402 depth=1.00x circular=true	1050454..1050892	Salmonella-enterica-Gallinarum-SGB_1	Not_published	AY956822
	SPI-1	99.77	430 / 430	1 length=4717402 depth=1.00x circular=true	1048354..1048783	Salmonella-enterica-Gallinarum-SGE_2	Not_published	AY956823
	SPI-1	100	470 / 470	1 length=4717402 depth=1.00x circular=true	1039605..1040074	Salmonella-enterica-Gallinarum-SGB_4	Not_published	AY956824
	SPI-1	100	415 / 415	1 length=4717402 depth=1.00x circular=true	1027873..1028287	Salmonella-enterica-Gallinarum-SGB_8	Not_published	AY956825
	SPI-1	98.07	259 / 257	1 length=4717402 depth=1.00x circular=true	1026735..1026993	Salmonella-enterica-Typhimurium-J4STEHO	-	JN982040
	SPI-1	98.48	3155 / 3141	1 length=4717402 depth=1.00x circular=true	1013902..1017054	Salmonella-enterica-Typhimurium-SL1344	fhlA/mutS	U16303
	SPI-10	99.28	553 / 554	1 length=4717402 depth=1.00x circular=true	4062371..4062923	Salmonella-enterica-Gallinarium-SGE_3	Not_published	AY956839
	SPI-12	97.94	9343 / 11075	1 length=4717402 depth=1.00x circular=true	1605992..1615330	Salmonella-enterica-Choleraesuis-SC_B67	tRNA-pro	NC_006905
	SPI-13	99.41	338 / 338	1 length=4717402 depth=1.00x circular=true	783688..784025	Salmonella-enterica-Gallinarum-SGD_3	tRNA-pheV	AY956832
	SPI-13	100	341 / 341	1 length=4717402 depth=1.00x circular=true	786104..786444	Salmonella-enterica-Gallinarum-SGA_10	tRNA-pheV	AY956834
	SPI-14	99.8	501 / 501	1 length=4717402 depth=1.00x circular=true	3065366..3065866	Salmonella-enterica-Gallinarum-SGA_8	Not_published	AY956835
	SPI-14	99.55	441 / 441	1 length=4717402 depth=1.00x circular=true	3059845..3060285	Salmonella-enterica-Gallinarum-SGC_8	Not_published	AY956836
	SPI-2	99.37	637 / 637	1 length=4717402 depth=1.00x circular=true	2219274..2219910	Salmonella-enterica-Gallinarum-SGB_10	tRNA-valV	AY956826
	SPI-2	100	642 / 642	1 length=4717402 depth=1.00x circular=true	2211964..2212605	Salmonella-enterica-Gallinarum-SGC_2	tRNA-valV	AY956827
	SPI-2	100	395 / 396	1 length=4717402 depth=1.00x circular=true	2216597..2216991	Salmonella-enterica-Gallinarum-SGC_9	tRNA-valV	AY956828
	SPI-2	100	425 / 425	1 length=4717402 depth=1.00x circular=true	2209939..2210363	Salmonella-enterica-Gallinarum-SGH_1	tRNA-valV	AY956829
	SPI-2	98.9	547 / 547	1 length=4717402 depth=1.00x circular=true	2199863..2200409	Salmonella-enterica-Gallinarum-SGD_8	tRNA-valV	AY956830
	SPI-2	100	384 / 384	1 length=4717402 depth=1.00x circular=true	2202324..2202707	Salmonella-enterica-Enteritidis-Se11	-	JN673270
	SPI-2	100	384 / 384	1 length=4717402 depth=1.00x circular=true	2202324..2202707	Salmonella-enterica-Enteritidis-C50041	-	JN673273
	SPI-2	99.05	4633 / 4631	1 length=4717402 depth=1.00x circular=true	2181909..2186536	Salmonella-enterica-Typhimurium-LT2	tRNA-valV	X99945
	SPI-2	99.2	1252 / 1252	1 length=4717402 depth=1.00x circular=true	2198283..2199534	Salmonella-enterica-Typhimurium-	tRNA-valV	Z95891
	SPI-3	99.05	738 / 738	1 length=4717402 depth=1.00x circular=true	73032..73769	Salmonella-enterica-Typhimurium-14028s	tRNA_selC	AJ000509
	SPI-3	98.94	1514 / 1514	1 length=4717402 depth=1.00x circular=true	89728..91241	Salmonella-enterica-Typhimurium-14028s	tRNA_selC	Y13864
	SPI-4	98.89	26700 / 26698	1 length=4717402 depth=1.00x circular=true	4275578..4302276	Salmonella-enterica-Choleraesuis-SC_B67	ssb-soxSR	NC_006905
	SPI-5	99.08	9069 / 9069	1 length=4717402 depth=1.00x circular=true	2889245..2898309	Salmonella-Typhimurium-LT2	tRNA-serT	NC_003197
	SPI-9	98.56	12647 / 15696	1 length=4717402 depth=1.00x circular=true	1155692..1168338	Salmonella-Typhi-CT18	Not_published	NC_003198

## Sheet: ID_615
Isolate ID	SPI	Identity	Query / Template length	Contig	Position in contig	Organism	Insertion Site	Accession number
SA615	C63PI	99.12	4000 / 4000	1 length=4685645 depth=1.00x circular=true	1024976..1028975	Salmonella-enterica-Typhimurium-SL1344	fhlA	AF128999
	CS54_island	98.07	19752 / 25252	1 length=4685645 depth=1.00x circular=true	1268296..1288036	Salmonella-enterica-Typhimurium-ATCC_14028	xseA-yfgK	AF140550
	Not_named	100	330 / 330	1 length=4685645 depth=1.00x circular=true	2173198..2173527	Salmonella-enterica-Enteritidis-CMCC50041	-	JQ071613
	SPI-1	99.7	2705 / 2705	1 length=4685645 depth=1.00x circular=true	1021696..1024400	Salmonella-enterica-Typhimurium-SL1344	fhlA/mutS	AF148689
	SPI-1	99.77	439 / 440	1 length=4685645 depth=1.00x circular=true	1018607..1019045	Salmonella-enterica-Gallinarum-SGB_1	Not_published	AY956822
	SPI-1	99.77	430 / 430	1 length=4685645 depth=1.00x circular=true	1016507..1016936	Salmonella-enterica-Gallinarum-SGE_2	Not_published	AY956823
	SPI-1	100	470 / 470	1 length=4685645 depth=1.00x circular=true	1007758..1008227	Salmonella-enterica-Gallinarum-SGB_4	Not_published	AY956824
	SPI-1	100	415 / 415	1 length=4685645 depth=1.00x circular=true	996026..996440	Salmonella-enterica-Gallinarum-SGB_8	Not_published	AY956825
	SPI-1	98.07	259 / 257	1 length=4685645 depth=1.00x circular=true	994888..995146	Salmonella-enterica-Typhimurium-J4STEHO	-	JN982040
	SPI-1	98.48	3155 / 3141	1 length=4685645 depth=1.00x circular=true	982055..985207	Salmonella-enterica-Typhimurium-SL1344	fhlA/mutS	U16303
	SPI-10	99.28	553 / 554	1 length=4685645 depth=1.00x circular=true	4030823..4031375	Salmonella-enterica-Gallinarium-SGE_3	Not_published	AY956839
	SPI-12	97.93	9343 / 11075	1 length=4685645 depth=1.00x circular=true	1574139..1583477	Salmonella-enterica-Choleraesuis-SC_B67	tRNA-pro	NC_006905
	SPI-13	99.41	338 / 338	1 length=4685645 depth=1.00x circular=true	751829..752166	Salmonella-enterica-Gallinarum-SGD_3	tRNA-pheV	AY956832
	SPI-13	100	341 / 341	1 length=4685645 depth=1.00x circular=true	754245..754585	Salmonella-enterica-Gallinarum-SGA_10	tRNA-pheV	AY956834
	SPI-14	99.8	501 / 501	1 length=4685645 depth=1.00x circular=true	3033499..3033999	Salmonella-enterica-Gallinarum-SGA_8	Not_published	AY956835
	SPI-14	99.55	441 / 441	1 length=4685645 depth=1.00x circular=true	3027978..3028418	Salmonella-enterica-Gallinarum-SGC_8	Not_published	AY956836
	SPI-2	99.37	637 / 637	1 length=4685645 depth=1.00x circular=true	2187410..2188046	Salmonella-enterica-Gallinarum-SGB_10	tRNA-valV	AY956826
	SPI-2	100	642 / 642	1 length=4685645 depth=1.00x circular=true	2180100..2180741	Salmonella-enterica-Gallinarum-SGC_2	tRNA-valV	AY956827
	SPI-2	100	395 / 396	1 length=4685645 depth=1.00x circular=true	2184733..2185127	Salmonella-enterica-Gallinarum-SGC_9	tRNA-valV	AY956828
	SPI-2	100	425 / 425	1 length=4685645 depth=1.00x circular=true	2178075..2178499	Salmonella-enterica-Gallinarum-SGH_1	tRNA-valV	AY956829
	SPI-2	98.9	547 / 547	1 length=4685645 depth=1.00x circular=true	2167999..2168545	Salmonella-enterica-Gallinarum-SGD_8	tRNA-valV	AY956830
	SPI-2	100	384 / 384	1 length=4685645 depth=1.00x circular=true	2170460..2170843	Salmonella-enterica-Enteritidis-Se11	-	JN673270
	SPI-2	100	384 / 384	1 length=4685645 depth=1.00x circular=true	2170460..2170843	Salmonella-enterica-Enteritidis-C50041	-	JN673273
	SPI-2	99.05	4633 / 4631	1 length=4685645 depth=1.00x circular=true	2150045..2154672	Salmonella-enterica-Typhimurium-LT2	tRNA-valV	X99945
	SPI-2	99.2	1252 / 1252	1 length=4685645 depth=1.00x circular=true	2166419..2167670	Salmonella-enterica-Typhimurium-	tRNA-valV	Z95891
	SPI-3	99.05	738 / 738	1 length=4685645 depth=1.00x circular=true	73032..73769	Salmonella-enterica-Typhimurium-14028s	tRNA_selC	AJ000509
	SPI-3	98.94	1514 / 1514	1 length=4685645 depth=1.00x circular=true	89728..91241	Salmonella-enterica-Typhimurium-14028s	tRNA_selC	Y13864
	SPI-4	98.89	26700 / 26698	1 length=4685645 depth=1.00x circular=true	4244016..4270714	Salmonella-enterica-Choleraesuis-SC_B67	ssb-soxSR	NC_006905
	SPI-5	99.08	9069 / 9069	1 length=4685645 depth=1.00x circular=true	2857378..2866442	Salmonella-Typhimurium-LT2	tRNA-serT	NC_003197
	SPI-9	98.56	12647 / 15696	1 length=4685645 depth=1.00x circular=true	1123845..1136491	Salmonella-Typhi-CT18	Not_published	NC_003198

## Sheet: ID_616
Isolate ID	SPI	Identity	Query / Template length	Contig	Position in contig	Organism	Insertion Site	Accession number
SA616	C63PI	99.12	4000 / 4000	1 length=4685645 depth=1.00x circular=true	1024976..1028975	Salmonella-enterica-Typhimurium-SL1344	fhlA	AF128999
	CS54_island	98.07	19752 / 25252	1 length=4685645 depth=1.00x circular=true	1268296..1288036	Salmonella-enterica-Typhimurium-ATCC_14028	xseA-yfgK	AF140550
	Not_named	100	330 / 330	1 length=4685645 depth=1.00x circular=true	2173198..2173527	Salmonella-enterica-Enteritidis-CMCC50041	-	JQ071613
	SPI-1	99.7	2705 / 2705	1 length=4685645 depth=1.00x circular=true	1021696..1024400	Salmonella-enterica-Typhimurium-SL1344	fhlA/mutS	AF148689
	SPI-1	99.77	439 / 440	1 length=4685645 depth=1.00x circular=true	1018607..1019045	Salmonella-enterica-Gallinarum-SGB_1	Not_published	AY956822
	SPI-1	99.77	430 / 430	1 length=4685645 depth=1.00x circular=true	1016507..1016936	Salmonella-enterica-Gallinarum-SGE_2	Not_published	AY956823
	SPI-1	100	470 / 470	1 length=4685645 depth=1.00x circular=true	1007758..1008227	Salmonella-enterica-Gallinarum-SGB_4	Not_published	AY956824
	SPI-1	100	415 / 415	1 length=4685645 depth=1.00x circular=true	996026..996440	Salmonella-enterica-Gallinarum-SGB_8	Not_published	AY956825
	SPI-1	98.07	259 / 257	1 length=4685645 depth=1.00x circular=true	994888..995146	Salmonella-enterica-Typhimurium-J4STEHO	-	JN982040
	SPI-1	98.48	3155 / 3141	1 length=4685645 depth=1.00x circular=true	982055..985207	Salmonella-enterica-Typhimurium-SL1344	fhlA/mutS	U16303
	SPI-10	99.28	553 / 554	1 length=4685645 depth=1.00x circular=true	4030823..4031375	Salmonella-enterica-Gallinarium-SGE_3	Not_published	AY956839
	SPI-12	97.93	9343 / 11075	1 length=4685645 depth=1.00x circular=true	1574139..1583477	Salmonella-enterica-Choleraesuis-SC_B67	tRNA-pro	NC_006905
	SPI-13	99.41	338 / 338	1 length=4685645 depth=1.00x circular=true	751829..752166	Salmonella-enterica-Gallinarum-SGD_3	tRNA-pheV	AY956832
	SPI-13	100	341 / 341	1 length=4685645 depth=1.00x circular=true	754245..754585	Salmonella-enterica-Gallinarum-SGA_10	tRNA-pheV	AY956834
	SPI-14	99.8	501 / 501	1 length=4685645 depth=1.00x circular=true	3033499..3033999	Salmonella-enterica-Gallinarum-SGA_8	Not_published	AY956835
	SPI-14	99.55	441 / 441	1 length=4685645 depth=1.00x circular=true	3027978..3028418	Salmonella-enterica-Gallinarum-SGC_8	Not_published	AY956836
	SPI-2	99.37	637 / 637	1 length=4685645 depth=1.00x circular=true	2187410..2188046	Salmonella-enterica-Gallinarum-SGB_10	tRNA-valV	AY956826
	SPI-2	100	642 / 642	1 length=4685645 depth=1.00x circular=true	2180100..2180741	Salmonella-enterica-Gallinarum-SGC_2	tRNA-valV	AY956827
	SPI-2	100	395 / 396	1 length=4685645 depth=1.00x circular=true	2184733..2185127	Salmonella-enterica-Gallinarum-SGC_9	tRNA-valV	AY956828
	SPI-2	100	425 / 425	1 length=4685645 depth=1.00x circular=true	2178075..2178499	Salmonella-enterica-Gallinarum-SGH_1	tRNA-valV	AY956829
	SPI-2	98.9	547 / 547	1 length=4685645 depth=1.00x circular=true	2167999..2168545	Salmonella-enterica-Gallinarum-SGD_8	tRNA-valV	AY956830
	SPI-2	100	384 / 384	1 length=4685645 depth=1.00x circular=true	2170460..2170843	Salmonella-enterica-Enteritidis-Se11	-	JN673270
	SPI-2	100	384 / 384	1 length=4685645 depth=1.00x circular=true	2170460..2170843	Salmonella-enterica-Enteritidis-C50041	-	JN673273
	SPI-2	99.05	4633 / 4631	1 length=4685645 depth=1.00x circular=true	2150045..2154672	Salmonella-enterica-Typhimurium-LT2	tRNA-valV	X99945
	SPI-2	99.2	1252 / 1252	1 length=4685645 depth=1.00x circular=true	2166419..2167670	Salmonella-enterica-Typhimurium-	tRNA-valV	Z95891
	SPI-3	99.05	738 / 738	1 length=4685645 depth=1.00x circular=true	73032..73769	Salmonella-enterica-Typhimurium-14028s	tRNA_selC	AJ000509
	SPI-3	98.94	1514 / 1514	1 length=4685645 depth=1.00x circular=true	89728..91241	Salmonella-enterica-Typhimurium-14028s	tRNA_selC	Y13864
	SPI-4	98.89	26700 / 26698	1 length=4685645 depth=1.00x circular=true	4244016..4270714	Salmonella-enterica-Choleraesuis-SC_B67	ssb-soxSR	NC_006905
	SPI-5	99.08	9069 / 9069	1 length=4685645 depth=1.00x circular=true	2857378..2866442	Salmonella-Typhimurium-LT2	tRNA-serT	NC_003197
	SPI-9	98.56	12647 / 15696	1 length=4685645 depth=1.00x circular=true	1123845..1136491	Salmonella-Typhi-CT18	Not_published	NC_003198

## Sheet: ID_617
Isolate ID	SPI	Identity	Query / Template length	Contig	Position in contig	Organism	Insertion Site	Accession number
SA617	C63PI	99.12	4000 / 4000	1 length=4685645 depth=1.00x circular=true	1024976..1028975	Salmonella-enterica-Typhimurium-SL1344	fhlA	AF128999
	CS54_island	98.07	19752 / 25252	1 length=4685645 depth=1.00x circular=true	1268296..1288036	Salmonella-enterica-Typhimurium-ATCC_14028	xseA-yfgK	AF140550
	Not_named	100	330 / 330	1 length=4685645 depth=1.00x circular=true	2173198..2173527	Salmonella-enterica-Enteritidis-CMCC50041	-	JQ071613
	SPI-1	99.7	2705 / 2705	1 length=4685645 depth=1.00x circular=true	1021696..1024400	Salmonella-enterica-Typhimurium-SL1344	fhlA/mutS	AF148689
	SPI-1	99.77	439 / 440	1 length=4685645 depth=1.00x circular=true	1018607..1019045	Salmonella-enterica-Gallinarum-SGB_1	Not_published	AY956822
	SPI-1	99.77	430 / 430	1 length=4685645 depth=1.00x circular=true	1016507..1016936	Salmonella-enterica-Gallinarum-SGE_2	Not_published	AY956823
	SPI-1	100	470 / 470	1 length=4685645 depth=1.00x circular=true	1007758..1008227	Salmonella-enterica-Gallinarum-SGB_4	Not_published	AY956824
	SPI-1	100	415 / 415	1 length=4685645 depth=1.00x circular=true	996026..996440	Salmonella-enterica-Gallinarum-SGB_8	Not_published	AY956825
	SPI-1	98.07	259 / 257	1 length=4685645 depth=1.00x circular=true	994888..995146	Salmonella-enterica-Typhimurium-J4STEHO	-	JN982040
	SPI-1	98.48	3155 / 3141	1 length=4685645 depth=1.00x circular=true	982055..985207	Salmonella-enterica-Typhimurium-SL1344	fhlA/mutS	U16303
	SPI-10	99.28	553 / 554	1 length=4685645 depth=1.00x circular=true	4030823..4031375	Salmonella-enterica-Gallinarium-SGE_3	Not_published	AY956839
	SPI-12	97.93	9343 / 11075	1 length=4685645 depth=1.00x circular=true	1574139..1583477	Salmonella-enterica-Choleraesuis-SC_B67	tRNA-pro	NC_006905
	SPI-13	99.41	338 / 338	1 length=4685645 depth=1.00x circular=true	751829..752166	Salmonella-enterica-Gallinarum-SGD_3	tRNA-pheV	AY956832
	SPI-13	100	341 / 341	1 length=4685645 depth=1.00x circular=true	754245..754585	Salmonella-enterica-Gallinarum-SGA_10	tRNA-pheV	AY956834
	SPI-14	99.8	501 / 501	1 length=4685645 depth=1.00x circular=true	3033499..3033999	Salmonella-enterica-Gallinarum-SGA_8	Not_published	AY956835
	SPI-14	99.55	441 / 441	1 length=4685645 depth=1.00x circular=true	3027978..3028418	Salmonella-enterica-Gallinarum-SGC_8	Not_published	AY956836
	SPI-2	99.37	637 / 637	1 length=4685645 depth=1.00x circular=true	2187410..2188046	Salmonella-enterica-Gallinarum-SGB_10	tRNA-valV	AY956826
	SPI-2	100	642 / 642	1 length=4685645 depth=1.00x circular=true	2180100..2180741	Salmonella-enterica-Gallinarum-SGC_2	tRNA-valV	AY956827
	SPI-2	100	395 / 396	1 length=4685645 depth=1.00x circular=true	2184733..2185127	Salmonella-enterica-Gallinarum-SGC_9	tRNA-valV	AY956828
	SPI-2	100	425 / 425	1 length=4685645 depth=1.00x circular=true	2178075..2178499	Salmonella-enterica-Gallinarum-SGH_1	tRNA-valV	AY956829
	SPI-2	98.9	547 / 547	1 length=4685645 depth=1.00x circular=true	2167999..2168545	Salmonella-enterica-Gallinarum-SGD_8	tRNA-valV	AY956830
	SPI-2	100	384 / 384	1 length=4685645 depth=1.00x circular=true	2170460..2170843	Salmonella-enterica-Enteritidis-Se11	-	JN673270
	SPI-2	100	384 / 384	1 length=4685645 depth=1.00x circular=true	2170460..2170843	Salmonella-enterica-Enteritidis-C50041	-	JN673273
	SPI-2	99.05	4633 / 4631	1 length=4685645 depth=1.00x circular=true	2150045..2154672	Salmonella-enterica-Typhimurium-LT2	tRNA-valV	X99945
	SPI-2	99.2	1252 / 1252	1 length=4685645 depth=1.00x circular=true	2166419..2167670	Salmonella-enterica-Typhimurium-	tRNA-valV	Z95891
	SPI-3	99.05	738 / 738	1 length=4685645 depth=1.00x circular=true	73032..73769	Salmonella-enterica-Typhimurium-14028s	tRNA_selC	AJ000509
	SPI-3	98.94	1514 / 1514	1 length=4685645 depth=1.00x circular=true	89728..91241	Salmonella-enterica-Typhimurium-14028s	tRNA_selC	Y13864
	SPI-4	98.89	26700 / 26698	1 length=4685645 depth=1.00x circular=true	4244016..4270714	Salmonella-enterica-Choleraesuis-SC_B67	ssb-soxSR	NC_006905
	SPI-5	99.08	9069 / 9069	1 length=4685645 depth=1.00x circular=true	2857378..2866442	Salmonella-Typhimurium-LT2	tRNA-serT	NC_003197
	SPI-9	98.56	12647 / 15696	1 length=4685645 depth=1.00x circular=true	1123845..1136491	Salmonella-Typhi-CT18	Not_published	NC_003198
