# Supplementary material for: Antimicrobial resistance and plasmid-associated virulence genes in Salmonella isolated from pigs, pork, and humans in border provinces of Thailand and neighboring countries
Source: PeerJ. 2025 Aug 25;13:e19884. doi: 10.7717/peerj.19884 (PMC12393075; doi:10.7717/peerj.19884)
Supplement: Supplemental Information 2 [file peerj-13-19884-s002.xlsx]

## Sheet: ID_SA607
Isolate ID	ORF_ID	Contig	Start	Stop	Orientation	Cut_Off	Pass_Bitscore	Best_Hit_Bitscore	Best_Hit_ARO	Best_Identities	ARO	Model_type	SNPs_in_Best_Hit_ARO	Other_SNPs	Drug Class	Resistance Mechanism	AMR Gene Family	Predicted_DNA	Predicted_Protein	CARD_Protein_Sequence	Percentage Length of Reference Sequence	ID	Model_ID	Nudged	Note	Hit_Start	Hit_End	Antibiotic
SA607	1_369 # 421789 # 422421 # -1 # ID=1_369;partial=00;start_type=ATG;rbs_motif=AGGA;rbs_spacer=9bp;gc_cont=0.506	1_369	421789	422421	-	Strict	400	418.3	CRP	99.05	3000518	protein homolog model	n/a	n/a	macrolide antibiotic; fluoroquinolone antibiotic; penam	antibiotic efflux	resistance-nodulation-cell division (RND) antibiotic efflux pump	ATGGTGCTTGGCAAACCGCAAACAGACCCGACTCTTGAATGGTTCTTGTCTCATTGCCACATTCATAAGTACCCGTCAAAGAGCACGCTGATTCACCAGGGTGAAAAAGCAGAAACGCTGTACTACATCGTTAAAGGCTCCGTGGCAGTGCTGATCAAAGATGAAGAAGGGAAAGAAATGATCCTTTCTTATCTGAATCAGGGTGATTTTATTGGTGAACTGGGCCTGTTTGAAGAAGGCCAGGAACGCAGCGCCTGGGTACGTGCGAAAACCGCATGTGAGGTCGCTGAAATTTCCTACAAAAAATTTCGCCAATTAATCCAGGTCAACCCGGATATTCTGATGCGCCTCTCTTCCCAGATGGCTCGTCGCTTACAAGTCACCTCTGAAAAAGTAGGT…	MVLGKPQTDPTLEWFLSHCHIHKYPSKSTLIHQGEKAETLYYIVKGSVAVLIKDEEGKEMILSYLNQGDFIGELGLFEEGQERSAWVRAKTACEVAEISYKKFRQLIQVNPDILMRLSSQMARRLQVTSEKVGNLAFLDVTGRIAQTLLNLAKQPDAMTHPDGMQIKITRQEIGQIVGCSRETVGRILKMLEDQNLISAHGKTIVVYGTR	MVLGKPQTDPTLEWFLSHCHIHKYPSKSKLIHQGEKAETLYYIVKGSVAVLIKDEEGKEMILSYLNQGDFIGELGLFEEGQERSAWVRAKTACEVAEISYKKFRQLIQVNPDILMRLSAQMARRLQVTSEKVGNLAFLDVTGRIAQTLLNLAKQPDAMTHPDGMQIKITRQEIGQIVGCSRETVGRILKMLEDQNLISAHGKTIVVYGTR	100	gnl|BL_ORD_ID|803|hsp_num:0	869			0	630	erythromycin; cloxacillin; oxacillin; norfloxacin
	1_662 # 692198 # 693019 # 1 # ID=1_662;partial=00;start_type=ATG;rbs_motif=AGG;rbs_spacer=9bp;gc_cont=0.536	1_662	692198	693019	+	Strict	500	511.5	bacA	97.07	3002986	protein homolog model	n/a	n/a	peptide antibiotic	antibiotic target alteration	undecaprenyl pyrophosphate related proteins	ATGAGCGATATGCACTCGCTGCTGATAGCGGCAATTTTGGGTGTGGTCGAAGGATTGACGGAGTTTTTGCCGGTATCCAGCACGGGCCATATGATTATTGTGGGTCATCTGCTGGGGTTTGAAGGCGATACGGCCAAGACATTCGAAGTGGTGATTCAACTTGGATCTATTCTGGCGGTCGTGGTGATGTTCTGGCGGCGGTTGTTTGGCCTCATCGGTATTCACTTTGGCCGCCCGCTACAGCGTGAAGGTGAAAGTAAAGGTCGATTAACGTTGATTCACATCCTGCTGGGCATGATTCCGGCGGTGGTGCTGGGGTTAGTCTTTCATGACACGATCAAGTCGCTATTTAACCCAATTAACGTGATGTACGCGCTGGTGGTAGGCGGTCTGTTGCTG…	MSDMHSLLIAAILGVVEGLTEFLPVSSTGHMIIVGHLLGFEGDTAKTFEVVIQLGSILAVVVMFWRRLFGLIGIHFGRPLQREGESKGRLTLIHILLGMIPAVVLGLVFHDTIKSLFNPINVMYALVVGGLLLIAAECLKPKEPRAPGLDDMTYRQAFMIGCFQCLALWPGFSRSGATISGGMLMGVSRYAASEFSFLLAVPMMMGATVLDLYKSWSFLTAADIPMFAVGFVTAFVVALIAIKTFLQLIKRISFIPFAIYRFVVAAAVYVVFF	MSDMHSLLIAAILGVVEGLTEFLPVSSTGHMIIVGHLLGFEGDTAKTFEVVIQLGSILAVVVMFWRRLFGLIGIHFGRPLQHEGESKGRLTLIHILLGMIPAVVLGLLFHDTIKSLFNPINVMYALVVGGLLLIAAECLKPKEPRAPGLDDMTYRQAFMIGCFQCLALWPGFSRSGATISGGMLMGVSRYAASEFSFLLAVPMMMGATALDLYKSWGFLTSGDIPMFAVGFITAFVVALIAIKTFLQLIKRISFIPFAIYRFIVAAAVYVVFF	100	gnl|BL_ORD_ID|1680|hsp_num:0	1820			0	819	bacitracin; bacitracin A; bacitracin B; bacitracin F
	1_1045 # 1095751 # 1095936 # 1 # ID=1_1045;partial=00;start_type=ATG;rbs_motif=AGGAG;rbs_spacer=6bp;gc_cont=0.511	1_1045	1095751	1095936	+	Strict	100	102.4	rsmA	85.25	3005069	protein homolog model	n/a	n/a	fluoroquinolone antibiotic; diaminopyrimidine antibiotic; phenicol antibiotic	antibiotic efflux	resistance-nodulation-cell division (RND) antibiotic efflux pump	ATGCTGATTCTGACTCGTCGAGTTGGTGAGACCCTCATGATTGGCGATGAGGTCACCGTGACAGTTTTAGGGGTGAAGGGCAACCAGGTGCGTATTGGCGTGAACGCCCCGAAAGAAGTTTCTGTCCATCGTGAAGAGATCTACCAGCGTATCCAGGCTGAAAAATCCCAGCAGTCCAGTTACTAA	MLILTRRVGETLMIGDEVTVTVLGVKGNQVRIGVNAPKEVSVHREEIYQRIQAEKSQQSSY	MLILTRRVGETLMVGDDVTVTVLGVKGNQVRIGVNAPKEVAVHREEIYQRIQKEKDQEPNH	100	gnl|BL_ORD_ID|2788|hsp_num:0	3807			0	183	trimethoprim; chloramphenicol
	1_1051 # 1102247 # 1103785 # -1 # ID=1_1051;partial=00;start_type=ATG;rbs_motif=GAGG;rbs_spacer=8bp;gc_cont=0.571	1_1051	1102247	1103785	-	Strict	900	966.5	emrB	95.9	3000074	protein homolog model	n/a	n/a	fluoroquinolone antibiotic	antibiotic efflux	major facilitator superfamily (MFS) antibiotic efflux pump	ATGCAACAGCAAAAACCGCTGGAGGGCGCGCAGCTCGTCATCATGACGATCGCGCTGTCGCTGGCGACATTCATGCAGGTGCTGGACTCCACCATTGCCAACGTGGCGATTCCGACCATCGCCGGGAACCTGGGTTCTTCCCTAAGCCAGGGGACATGGGTTATCACCTCTTTCGGGGTGGCGAACGCTATCTCGATTCCCTTAACCGGCTGGCTGGCGAAACGTTTTGGCGAAGTCAAACTGTTCATGTGGTCGACGGTCGCCTTTGCCGCGGCCTCCTGGGCCTGTGGCGTATCCAGCAGCCTGAATATGCTTATCTTCTTCCGCGTGGTGCAGGGCGTGGTCGCCGGGCCGCTGATTCCGCTCTCGCAAAGCCTGTTGCTGAATAACTATCCGCCT…	MQQQKPLEGAQLVIMTIALSLATFMQVLDSTIANVAIPTIAGNLGSSLSQGTWVITSFGVANAISIPLTGWLAKRFGEVKLFMWSTVAFAAASWACGVSSSLNMLIFFRVVQGVVAGPLIPLSQSLLLNNYPPAKRSIALALWSMTVIVAPICGPILGGYISDNYHWGWIFFINVPIGIAVVLMTLHTLRGRETHTERRRIDAVGLALLVIGIGSLQIMLDRGKELDWFSSQEIIILTVVAVIAISFLIVWELTDDHPIVDLSLFKSRNFTIGCLCISLAYMLYFGAIVLLPQLLQEVYGYTATWAGLASAPVGIIPVILSPIIGRFAHKLDMRRLVTFSFIMYAVCFYWRAWTFEPGMDFGASAWPQFIQGFAVACFFMPLTTITLSGLPPERLAAAS…	MQQQKPLEGAQLVIMTIALSLATFMQVLDSTIANVAIPTIAGNLGSSLSQGTWVITSFGVANAISIPLTGWLAKRVGEVKLFLWSTIAFAIASWACGVSSSLNMLIFFRVIQGIVAGPLIPLSQSLLLNNYPPAKRSIALALWSMTVIVAPICGPILGGYISDNYHWGWIFFINVPIGVAVVLMTLQTLRGRETRTERRRIDAVGLALLVIGIGSLQIMLDRGKELDWFSSQEIIILTVVAVVAICFLIVWELTDDNPIVDLSLFKSRNFTIGCLCISLAYMLYFGAIVLLPQLLQEVYGYTATWAGLASAPVGIIPVILSPIIGRFAHKLDMRRLVTFSFIMYAVCFYWRAYTFEPGMDFGASAWPQFIQGFAVACFFMPLTTITLSGLPPERLAAAS…	100	gnl|BL_ORD_ID|1705|hsp_num:0	1847			0	1536	nalidixic acid
	1_1053 # 1105101 # 1105631 # -1 # ID=1_1053;partial=00;start_type=ATG;rbs_motif=GAGG;rbs_spacer=10bp;gc_cont=0.482	1_1053	1105101	1105631	-	Strict	280	327	emrR	93.14	3000516	protein homolog model	n/a	n/a	fluoroquinolone antibiotic	antibiotic efflux	major facilitator superfamily (MFS) antibiotic efflux pump	ATGGATAGTTCGTTTACGCCCATTGAACAAATGCTAAAATTTCGCGCCAGCCGTCACGAAGACTTTCCTTATCAGGAAATTCTTTTGACTCGTCTTTGTATGCACATGCAAGGCAAGCTCCTGGAAAACCGCAATAAAATGCTGAAGGCTCAAGGGATTAACGAGACGTTGTTTATGGCGTTGATTACGCTGGAGTCTCAGGAAAACCACAGTATTCAGCCGTCTGAATTAAGCTGCGCGCTGGGTTCATCTCGCACCAATGCGACACGCATTGCAGATGAGCTGGAAAAACGCGGCTGGATTGAGCGTCGTGAGAGCGATAACGACCGCCGTTGCCTGCATCTGCAATTAACGGAGAAAGGCCAGGCATTTTTGCAAGAAGTGCTTCCGCCTCAGCAT…	MDSSFTPIEQMLKFRASRHEDFPYQEILLTRLCMHMQGKLLENRNKMLKAQGINETLFMALITLESQENHSIQPSELSCALGSSRTNATRIADELEKRGWIERRESDNDRRCLHLQLTEKGQAFLQEVLPPQHHCLHQLWSSLSTAEKDQLEHITRKLLTRLDQMEQEGTVLEALR	MDSSFTPIEQMLKFRASRHEDFPYQEILLTRLCMHMQSKLLENRNKMLKAQGINETLFMALITLESQENHSIQPSELSCALGSSRTNATRIADELEKRGWIERRESDNDRRCLHLQLTEKGHEFLREVLPPQHNCLHQLWSALSTTEKDQLEQITRKLLSRLDQMEQDGVVLEAMS	100	gnl|BL_ORD_ID|1225|hsp_num:0	1330			0	525	nalidixic acid
	1_1434 # 1546825 # 1548471 # -1 # ID=1_1434;partial=00;start_type=ATG;rbs_motif=GAG;rbs_spacer=6bp;gc_cont=0.541	1_1434	1546825	1548471	-	Strict	400	718.8	ArnT	62.61	3005053	protein homolog model	n/a	n/a	peptide antibiotic	antibiotic target alteration	pmr phosphoethanolamine transferase	ATGATGAAATCGATACGCTATTATCTGGCTTTCGCCGCATTTATCGCGCTCTACTATGTTATTCCTGTCAATAGCCGCCTGCTCTGGCAGCCGGATGAAACGCGCTATGCCGAAATAAGTCGGGAGATGCTGGCGTCTGGCGACTGGATCGTGCCGCATTTTCTGGGATTACGTTATTTTGAAAAACCGATAGCCGGTTACTGGATAAACAGTCTGGGTCAGTGGCTTTTTGGCGCTACCAATTTTGGCGTGCGGGCTGGCGCTATTTTAACGACATTGCTGGCCGCAGCGCTGGTGGCGTGGCTGACGTTCCGCTTATGGCGGGATAAACGTACCGCGTTGCTCGCCTCCGTTATCTTTCTCTCCCTCTTTGCCGTTTACAGTATCGGGACGTATGCG…	MMKSIRYYLAFAAFIALYYVIPVNSRLLWQPDETRYAEISREMLASGDWIVPHFLGLRYFEKPIAGYWINSLGQWLFGATNFGVRAGAILTTLLAAALVAWLTFRLWRDKRTALLASVIFLSLFAVYSIGTYAVLDPMIALWLTAGMCCFWQGMQATTRTGKIGMFLLLGATCGLGVLTKGFLALAVPVVSVLPWVIVQKRWKDFLLYGWLAVLSCFVVVLPWAIAIARREADFWHYFFWVEHIQRFAMSDAQHKAPFWYYLPVLLAGSLPWLGLLPGALKLGWRERNGAFYLLGWTIMPLLFFSIAKGKLPTYVLSCFAPIAILMARFVLHNVKEGVAALRVNGGINLVFGIIGIVAAFVVSSWGPLKSPVWTHIETYKVFCVWGVFTVWAFVGWYSL…	MKSIRYGVSLIALFALYYLLPLNFRLLWQPDETRYAEISREMLATGDWVVPHFLGLRYFEKPIAGYWINSIGQWLFGHNNFGVRFGSVFAITMTALLVAWLAWRIFRDKRVAILSLIIFLTAMLVYAIGTYAVLDPMITLWLALAMCSFWGAVQAHSRSGKILGYVLLGVACGMGVMTKGFLALAVPVVGVLPWVIARKRWREVLTYGWLAVIVCTLVVLPWGLAIAQREPDFWRYFFWVEHIQRFAEKDAQHKAPFWYYIPFLIAGSLPWLALLPGALKRGWLERDEARGALYLLGWVAMPFLFFSIAKGKLPTYILPCFAPLSILMARYALEAAKTGAKALRINGMINLGVGLLGLIAVLVVSPWGFMHKPVWTKIELYKCLLAAIAFAVWALMGWL…	99.46	gnl|BL_ORD_ID|2779|hsp_num:0	3795			0	1653	colistin A; colistin B
	1_1437 # 1551343 # 1552326 # -1 # ID=1_1437;partial=00;start_type=ATG;rbs_motif=AGGA;rbs_spacer=8bp;gc_cont=0.538	1_1437	1551343	1552326	-	Strict	550	554.7	PmrF	87.42	3003578	protein homolog model	n/a	n/a	peptide antibiotic	antibiotic target alteration	pmr phosphoethanolamine transferase	ATGTTTGACGCCGCCCCCATAAAAAAAGTCTCGGTGGTTATTCCTGTCTATAACGAACAGGAAAGCCTGCCGGAATTGATAAGACGCACCACCGCCGCCTGCGAGAGTCTGGGCAAAGCGTGGGAGATTTTATTGATAGATGATGGTAGCAGCGATAGCTCGGCGGAGCTGATGGTTAAGGCGTCCCAGGAAGCCGATAGCCATATCATCTCTATTTTACTCAACCGTAACTACGGTCAACATGCAGCGATCATGGCGGGGTTTAGCCATGTAAGCGGCGATCTCATCATTACGCTGGATGCCGATCTGCAAAACCCGCCGGAAGAGATCCCGCGCCTGGTGGCGAAAGCCGATGAAGGGTTCGATGTGGTAGGCACCGTGCGCCAGAACCGACAGGAC…	MFDAAPIKKVSVVIPVYNEQESLPELIRRTTAACESLGKAWEILLIDDGSSDSSAELMVKASQEADSHIISILLNRNYGQHAAIMAGFSHVSGDLIITLDADLQNPPEEIPRLVAKADEGFDVVGTVRQNRQDSLFRKSASKIINLLIQRTTGKAMGDYGCMLRAYRRPIIDTMLRCHERSTFIPILANIFARRATEIPVHHAEREFGDSKYSFMRLINLMYDLVTCLTTTPLRLLSLLGSVIAIGGFSLSVLLIVLRLALGPQWAAEGVFMLFAVLFTFIGAQFIGMGLLGEYIGRIYNDVRARPRYFVQQVIYPESTPFTEESHQ	MFEIHPVKKVSVVIPVYNEQESLPELIRRTTTACESLGKEYEILLIDDGSSDNSAHMLVEASQAENSHIVSILLNRNYGQHSAIMAGFSHVTGDLIITLDADLQNPPEEIPRLVAKADEGYDVVGTVRQNRQDSWFRKTASKMINRLIQRTTGKAMGDYGCMLRAYRRHIVDAMLHCHERSTFIPILANIFARRAIEIPVHHAEREFGESKYSFMRLINLMYDLVTCLTTTPLRMLSLLGSIIAIGGFSIAVLLVILRLTFGPQWAAEGVFMLFAVLFTFIGAQFIGMGLLGEYIGRIYTDVRARPRYFVQQVIRPSSKENE	101.55	gnl|BL_ORD_ID|1936|hsp_num:0	2014			0	954	polymyxin B
	1_1710 # 1852269 # 1853693 # 1 # ID=1_1710;partial=00;start_type=TTG;rbs_motif=AGG;rbs_spacer=6bp;gc_cont=0.538	1_1710	1852269	1853693	+	Strict	900	909.1	MdtK	99.16	3001327	protein homolog model	n/a	n/a	fluoroquinolone antibiotic	antibiotic efflux	multidrug and toxic compound extrusion (MATE) transporter	TTGAACGTCTCCACTGCCTTACGCCAGGCTGTCGTCCGTACGCCCTGGTATGCCAAACGCAAGAGCTACAAAGTGTTGTTCTGGCGTGAAATCACCCCACTTGCTATCCCTATTTTTCTGGAAAATACCTGTGTTTTGCTAATGGGCGTGCTCAGTACTTTTCTCGTCAGTTGGCTGGGCAAGGAAGCAATGGCGGGCGTGGGGCTTGCCGACAGTTTTAATATGGTAATTATGGCTTTTTTTGCGGCTATCGATCTTGGTACTACGGTGGTGGTTGCCTTTAGCCTGGGCAAGCGCGACAGGCGACGGGCAAGGGCGGCGGCGCGCCAGTCGCTGGTGATTATGACGCTATTTGCCGTTGTGCTGGCAGTGGTCATTCATTATTTCGGCAGTGAAATT…	MNVSTALRQAVVRTPWYAKRKSYKVLFWREITPLAIPIFLENTCVLLMGVLSTFLVSWLGKEAMAGVGLADSFNMVIMAFFAAIDLGTTVVVAFSLGKRDRRRARAAARQSLVIMTLFAVVLAVVIHYFGSEIINIVAGEATSEVKGLALTYLELTVLSYPAAAIALIGSGALRGAGNTKIPLMINGGMNILNIIISSILIYGAFSWQGLGFAGAGLGLTISRYIGAVAIIWVLMIGFNPALRIPLKSYLKPLNFGIIWEVMGIGIPASIESVLFNGGKLLTQMFVAGMGTNVIAGNFIAFSVAALINLPGNALGSASTIITGKRLGTGQIGQAERQLRHVFWMSTIVLTAIAWGTAPFAGLFASFYTQEQDVKEVVKVLLWLNAVFMPIWAAAWVLPS…	MNVSTALRQAVVRTPWYAKRKSYKVLFWREITPLAIPIFLENTCVLLMGVLSTFLVSWLGKEAMAGVGLADSFNMVIMAFFAAIDLGTTVVVAFSLGKRDRRRARAAARQSLVIMTLFAVVLAVVIHYFGSEIINIVAGEATPEVKGLALTYLELTVLSYPAAAIALIGSGALRGAGNTKIPLMINGGMNILNIIISSILIYGAFSWQGLGFAGAGLGLTISRYIGAVAIIWVLMIGFNPALRIPLKSYLKPLNFGIIWEVMGIGIPASIESVLFNGSKLLTQMFVAGMGTNVIAGNFIAFSVAALINLPGNALGSASTIITGKRLGTGQIGQAERQLRHVFWMSTIVLTAIAWGTAPFAGLFASFYTQEQDVKEVVKVLLWLNAAFMPIWAAAWVLPS…	100	gnl|BL_ORD_ID|1649|hsp_num:0	1752			0	1422	ciprofloxacin
	1_2153 # 2282425 # 2282787 # 1 # ID=1_2153;partial=00;start_type=ATG;rbs_motif=AGGAG;rbs_spacer=7bp;gc_cont=0.446	1_2153	2282425	2282787	+	Strict	150	169.1	Klebsiella pneumoniae KpnE	76.67	3004580	protein homolog model	n/a	n/a	macrolide antibiotic; aminoglycoside antibiotic; cephalosporin; tetracycline antibiotic; peptide antibiotic; rifamycin antibiotic; disinfecting agents and antiseptics	antibiotic efflux	small multidrug resistance (SMR) antibiotic efflux pump	ATGTTTTACTGGATTTTATTAGCTCTGGCTATCGCGACTGAAATTACCGGCACGCTCTCAATGAAATGGGCTAGCGTGGGTAATGGCAATGCGGGTTTTATTTTAATGCTGGTGATGATCACGCTGTCATATATATTTCTTTCTTTTGCGGTAAAAAAGATTGCCCTGGGTGTAGCGTATGCCTTATGGGAAGGGATCGGCATTTTATTTATTACCATTTTTAGCGTGCTGCTATTTGATGAAGCATTATCAACCATGAAGATTGCCGGCTTGCTGACGCTGGTCGCCGGCATAGTATTGATCAAATCAGGGACGCGTAAACCCGGCAAACCGGTGAAGGAGGCGACTCGTGCAACAATTTGA	MFYWILLALAIATEITGTLSMKWASVGNGNAGFILMLVMITLSYIFLSFAVKKIALGVAYALWEGIGILFITIFSVLLFDEALSTMKIAGLLTLVAGIVLIKSGTRKPGKPVKEATRATI	MFYWILLALAIIAEITGTLSMKWASVSGGHTGFILMLAMIALSYIFLAFAVKKIALGVAYALWEGIGILLITLFSVLLFDESLSLLKIAGLTTLVIGIVLIKSGTQKKASSQQEVAHAAV	100	gnl|BL_ORD_ID|2715|hsp_num:0	3283			0	360	erythromycin; streptomycin; tetracycline; cefepime; ceftriaxone; rifampin; colistin A; colistin B; triclosan; benzalkonium chloride; chlorhexidine
	1_2154 # 2282774 # 2283103 # 1 # ID=1_2154;partial=00;start_type=GTG;rbs_motif=AGGAG;rbs_spacer=7bp;gc_cont=0.558	1_2154	2282774	2283103	+	Strict	150	189.1	Klebsiella pneumoniae KpnF	87.16	3004583	protein homolog model	n/a	n/a	macrolide antibiotic; aminoglycoside antibiotic; cephalosporin; tetracycline antibiotic; peptide antibiotic; rifamycin antibiotic; disinfecting agents and antiseptics	antibiotic efflux	small multidrug resistance (SMR) antibiotic efflux pump	GTGCAACAATTTGAATGGATACACGGCGCCTGGCTTGGGCTGGCAATAATGCTGGAAATCGCGGCTAACGTACTGTTGAAATTTTCGGACGGCTTTCGCCGTAAATGCTATGGCATCTTATCGCTTGCCGCTGTTCTGGCCGCCTTCAGCGCGCTTTCCCAGGCGGTAAAAGGGATAGACCTGTCGGTGGCGTATGCGTTATGGGGCGGTTTTGGTATTGCCGCCACGCTGGCGGCGGGCTGGGTGCTCTTCGGCCAGCGCTTAAACCCCAAAGGCTGGGTTGGCGTGATATTGCTGCTCGCCGGAATGGTCATGATCAAATTTGCCTGA	MQQFEWIHGAWLGLAIMLEIAANVLLKFSDGFRRKCYGILSLAAVLAAFSALSQAVKGIDLSVAYALWGGFGIAATLAAGWVLFGQRLNPKGWVGVILLLAGMVMIKFA	MQQFEWIHAAWLAIAIVLEIIANVFLKFSDGFRRKIYGILSLAAVLGAFSALSQAVKGIDLSVAYALWGGFGIAATIAAGWVLFGQRLNNKGWAGVILLVAGMVLIKLA	100	gnl|BL_ORD_ID|2717|hsp_num:0	3286			0	327	erythromycin; streptomycin; tetracycline; cefepime; ceftriaxone; rifampin; colistin A; colistin B; triclosan; benzalkonium chloride; chlorhexidine
	1_2191 # 2319284 # 2319667 # -1 # ID=1_2191;partial=00;start_type=ATG;rbs_motif=GAGG;rbs_spacer=7bp;gc_cont=0.471	1_2191	2319284	2319667	-	Strict	230	247.3	marA	95.24	3000263	protein homolog model	n/a	n/a	fluoroquinolone antibiotic; monobactam; carbapenem; cephalosporin; glycylcycline; cephamycin; penam; tetracycline antibiotic; rifamycin antibiotic; phenicol antibiotic; penem; disinfecting agents and antiseptics	antibiotic efflux; reduced permeability to antibiotic	resistance-nodulation-cell division (RND) antibiotic efflux pump; General Bacterial Porin with reduced permeability to beta-lactams	ATGTCCAGACGCAACACTGACGCTATTACTATTCATAGCATTTTGGACTGGATCGAGGATAACCTGGAGTCGCCGCTCTCACTGGAAAAAGTGTCTGAGCGTTCAGGATATTCCAAATGGCACCTGCAACGGATGTTTAAAAAAGAGACCGGTCATTCATTAGGCCAATACATCCGCAGCCGTAAAATGACGGAAATCGCGCAAAAATTAAAAGAGAGCAACGAGCCCATTCTCTATCTGGCGGAACGCTATGGCTTTGAGTCACAGCAAACATTGACCCGGACGTTCAAAAACTACTTTGATGTGCCGCCACACAAATACCGGATCACCAATATGCATGGCGAATCACGGTATATGCTGCCGCTGAACCATGGCAACTACTAG	MSRRNTDAITIHSILDWIEDNLESPLSLEKVSERSGYSKWHLQRMFKKETGHSLGQYIRSRKMTEIAQKLKESNEPILYLAERYGFESQQTLTRTFKNYFDVPPHKYRITNMHGESRYMLPLNHGNY	MSRRNTDAITIHSILDWIEDNLESPLSLEKVSERSGYSKWHLQRMFKKETGHSLGQYIRSRKMTEIAQKLKESNEPILYLAERYGFESQQTLTRTFKNYFDVPPHKYRMTNMQGESRFLHPLNHYNS	100	gnl|BL_ORD_ID|1771|hsp_num:0	1922			0	378	tigecycline; tetracycline; rifampin; chloramphenicol; ampicillin; cefalotin; triclosan
	1_2286 # 2425023 # 2425460 # 1 # ID=1_2286;partial=00;start_type=ATG;rbs_motif=AGGAG;rbs_spacer=7bp;gc_cont=0.523	1_2286	2425023	2425460	+	Strict	275	298.1	AAC(6')-Iy	97.24	3002569	protein homolog model	n/a	n/a	aminoglycoside antibiotic	antibiotic inactivation	AAC(6')	ATGGACATCAGGCAAATGAACAAAACCCATCTGGAGCACTGGCGCGGATTGCGAAAACAGCTCTGGCCCGGTCACCCGGATGACGCCCATCTGGCAGACGGCGAAGAAATCCTGCAAGCCGATCATTTGGCATCATTTGTTGCGATGGCAGACGGGGTGGCGATTGGCTTTGCGGATGCCTCAATCCGCCACGATTATGTCAATGGCTGTGACAGTTCGCCCGTGGCTTTTCTTGAAGGTATTTTTGTTCTCCCCTCGTTCCGTCAACGCGGCGTAGCGAAACAATTGATTGCAGCGGTGCAACGATGGGGAACGAATAAAGGGTGTCGGGAAATGGCCTCTGATACCACGCCGGAAAATACAATTTCCCAGAAAGTTCACCTGGCATTAGGATTTGAG…	MDIRQMNKTHLEHWRGLRKQLWPGHPDDAHLADGEEILQADHLASFVAMADGVAIGFADASIRHDYVNGCDSSPVAFLEGIFVLPSFRQRGVAKQLIAAVQRWGTNKGCREMASDTTPENTISQKVHLALGFEETERVIFYRKRC	MDIRQMNKTHLEHWRGLRKQLWPGHPDDAHLADGEEILQADHLASFIAMADGVAIGFADASIRHDYVNGCDSSPVVFLEGIFVLPSFRQRGVAKQLIAAVQRWGTNKGCREMASDTSPENTISQKVHQALGFEETERVIFYRKRC	100	gnl|BL_ORD_ID|330|hsp_num:0	360			0	435	dibekacin; amikacin; sisomicin; netilmicin; tobramycin; 2'-N-ethylnetilmicin; 5-episisomicin
	1_2444 # 2582082 # 2582495 # 1 # ID=1_2444;partial=00;start_type=ATG;rbs_motif=GAG;rbs_spacer=9bp;gc_cont=0.454	1_2444	2582082	2582495	+	Strict	240	245.7	H-NS	94.89	3000676	protein homolog model	n/a	n/a	macrolide antibiotic; fluoroquinolone antibiotic; cephalosporin; cephamycin; penam; tetracycline antibiotic	antibiotic efflux	major facilitator superfamily (MFS) antibiotic efflux pump; resistance-nodulation-cell division (RND) antibiotic efflux pump	ATGAGCGAAGCACTTAAAATTCTGAACAACATCCGTACTCTTCGTGCGCAGGCAAGAGAATGTACTCTGGAAACGCTTGAAGAAATGCTGGAAAAATTAGAAGTTGTCGTTAATGAGCGTCGTGAAGAAGAAAGCGCTGCTGCTGCTGAAGTGGAAGAACGCACTCGTAAACTGCAACAGTATCGTGAAATGTTAATTGCCGACGGCATTGACCCGAATGAACTGCTGAATAGCATGGCTGCCGCTAAATCCGGTACCAAAGCTAAACGCGCAGCTCGTCCGGCTAAATATAGCTATGTTGACGAAAACGGTGAAACTAAAACCTGGACTGGCCAGGGTCGTACACCGGCTGTAATCAAAAAAGCAATGGAAGAACAAGGTAAGCAACTGGAAGATTTC…	MSEALKILNNIRTLRAQARECTLETLEEMLEKLEVVVNERREEESAAAAEVEERTRKLQQYREMLIADGIDPNELLNSMAAAKSGTKAKRAARPAKYSYVDENGETKTWTGQGRTPAVIKKAMEEQGKQLEDFLIKE	MSEALKILNNIRTLRAQARECTLETLEEMLEKLEVVVNERREEESAAAAEVEERTRKLQQYREMLIADGIDPNELLNSLAAVKSGTKAKRAQRPAKYSYVDENGETKTWTGQGRTPAVIKKAMDEQGKSLDDFLIKQ	100	gnl|BL_ORD_ID|1144|hsp_num:0	1248			0	411	erythromycin; cloxacillin; ciprofloxacin; tetracycline; oxacillin; norfloxacin
	1_2662 # 2796075 # 2796797 # -1 # ID=1_2662;partial=00;start_type=ATG;rbs_motif=None;rbs_spacer=None;gc_cont=0.492	1_2662	2796075	2796797	-	Strict	470	488.4	sdiA	99.58	3000826	protein homolog model	n/a	n/a	fluoroquinolone antibiotic; cephalosporin; glycylcycline; penam; tetracycline antibiotic; rifamycin antibiotic; phenicol antibiotic; disinfecting agents and antiseptics	antibiotic efflux	resistance-nodulation-cell division (RND) antibiotic efflux pump	ATGCAGGAAAATGATTTCTTCACCTGGCGACGCGCAATGTTGTTACGCTTTCAGGAGATGGCGGCAGCAGAGGATGTTTATACTGAATTGCAATATCAGACACAGCGGCTGGAATTTGATTATTATGCCCTGTGTGTTCGTCATCCCGTCCCCTTTACCCGGCCTAAAATATCGCTTCGTACCACTTATCCTCCGGCGTGGGTAACGCATTACCAGTCCGAAAACTATTTTGCGATCGATCCGGTATTAAAGCCGGAAAATTTCAGGCAGGGTCATTTACATTGGGATGACGTGCTATTTCATGAAGCGCAGGCGATGTGGGATGCCGCCCAGCGTTTCGGATTACGCAGAGGCGTAACCCAGTGTGTGATGTTGCCGAACCGGGCGCTGGGCTTTTTA…	MQENDFFTWRRAMLLRFQEMAAAEDVYTELQYQTQRLEFDYYALCVRHPVPFTRPKISLRTTYPPAWVTHYQSENYFAIDPVLKPENFRQGHLHWDDVLFHEAQAMWDAAQRFGLRRGVTQCVMLPNRALGFLSFSRSSLRCSSFTYDEVELRLQLLARESLSALTRFEDDMVMAPEMRFSKREKEILKWTAEGKTSSEIAIILSISENTVNFHQKNMQKKFNAPNKTQIACYAAATGLI	MQENDFFTWRRAMLLRFQEMAAAEDVYTELQYQTQRLEFDYYALCVRHPVPFTRPKISLRTTYPPAWVTHYQSENYFAIDPVLKPENFRQGHLHWDDVLFHEAKAMWDAAQRFGLRRGVTQCVMLPNRALGFLSFSRSSLRCSSFTYDEVELRLQLLARESLSALTRFEDDMVMAPEMRFSKREKEILKWTAEGKTSSEIAIILSISENTVNFHQKNMQKKFNAPNKTQIACYAAATGLI	100	gnl|BL_ORD_ID|208|hsp_num:0	228			0	720	tigecycline; tetracycline; rifampin; chloramphenicol; ampicillin; cefalotin; triclosan
	1_2832 # 2964144 # 2965892 # -1 # ID=1_2832;partial=00;start_type=ATG;rbs_motif=None;rbs_spacer=None;gc_cont=0.516	1_2832	2964144	2965892	-	Strict	1000	1067.4	msbA	96.39	3003950	protein homolog model	n/a	n/a	nitroimidazole antibiotic	antibiotic efflux	ATP-binding cassette (ABC) antibiotic efflux pump	ATGCATAACGATAAAGATCTCTCTACGTGGCAGACCTTCCGCCGACTGTGGCCAACCATAGCGCCTTTTAAAGCAGGTCTGATCGTGGCGGGCATAGCGTTAATTCTCAACGCAGCCAGCGATACCTTCATGCTATCGCTCCTCAAGCCATTACTGGATGATGGTTTCGGTAAAACGGATCGCTCAGTGTTGCTGTGGATGCCGCTGGTGGTTATTGGGCTGATGATATTACGAGGCATCACTAGCTATATCTCCAGCTACTGTATTTCATGGGTGTCAGGCAAGGTGGTAATGACCATGCGCCGTCGCCTGTTTGGCCATATGATGGGAATGCCCGTCGCCTTCTTTGATAAACAGTCTACCGGTACGCTGCTGTCGCGTATTACTTACGATTCAGAA…	MHNDKDLSTWQTFRRLWPTIAPFKAGLIVAGIALILNAASDTFMLSLLKPLLDDGFGKTDRSVLLWMPLVVIGLMILRGITSYISSYCISWVSGKVVMTMRRRLFGHMMGMPVAFFDKQSTGTLLSRITYDSEQVASSSSGALITVVREGASIIGLFIMMFYYSWQLSIILVVLAPIVSIAIRVVSKRFRSISKNMQNTMGQVTTSAEQMLKGHKEVLIFGGQEVETKRFDKVSNKMRLQGMKMVSASSISDPIIQLIASLALAFVLYAASFPSVMDSLTAGTITVVFSSMIALMRPLKSLTNVNAQFQRGMAACQTLFAILDSEQEKDEGKRVIDRATGDLEFRNVTFTYPGREVPALRNINLKIPAGKTVALVGRSGSGKSTIASLITRFYDIDEGH…	MHNDKDLSTWQTFRRLWPTIAPFKAGLIVAGVALILNAASDTFMLSLLKPLLDDGFGKTDRSVLVWMPLVVIGLMILRGITSYVSSYCISWVSGKVVMTMRRRLFGHMMGMPVSFFDKQSTGTLLSRITYDSEQVASSSSGALITVVREGASIIGLFIMMFYYSWQLSIILIVLAPIVSIAIRVVSKRFRNISKNMQNTMGQVTTSAEQMLKGHKEVLIFGGQEVETKRFDKVSNRMRLQGMKMVSASSISDPIIQLIASLALAFVLYAASFPSVMDSLTAGTITVVFSSMIALMRPLKSLTNVNAQFQRGMAACQTLFTILDSEQEKDEGKRVIERATGDVEFRNVTFTYPGRDVPALRNINLKIPAGKTVALVGRSGSGKSTIASLITRFYDIDEGE…	100	gnl|BL_ORD_ID|2183|hsp_num:0	2423			0	1746	metronidazole
	1_2907 # 3052863 # 3054095 # -1 # ID=1_2907;partial=00;start_type=ATG;rbs_motif=GAG;rbs_spacer=5bp;gc_cont=0.554	1_2907	3052863	3054095	-	Strict	700	700.7	Escherichia coli mdfA	87.71	3001328	protein homolog model	n/a	n/a	tetracycline antibiotic; disinfecting agents and antiseptics	antibiotic efflux	major facilitator superfamily (MFS) antibiotic efflux pump	ATGCAGAATCGTTTACAATCAGGCGGCAGGCTGGGACGTCAGGCGCTGCTTTTTCCTCTCTGTCTGGTGCTGTACGAATTTTCTACTTATATTGGCAACGACATGATCCAGCCGGGTATGCTGGCGGTGGTTGAGCAGTATCAGGCGTGCCTGGACTGGGTTCCGACGTCCATGACCGCTTATCTGGCGGGCGGTATGTTCTTACAGTGGCTGCTTGGCCCGTTGTCTGACCGGATTGGCCGTCGTCCCGTGATGCTGGCGGGCGTCGTGTGGTTTATTGTCACCTGCCTGGCGACGTTACTGGCGAAAAACATCGAACAATTTACCTTCCTGCGTTTTTTGCAAGGGATTAGCCTGTGTTTTATCGGCGCTGTAGGGTATGCCGCGATTCAGGAGTCC…	MQNRLQSGGRLGRQALLFPLCLVLYEFSTYIGNDMIQPGMLAVVEQYQACLDWVPTSMTAYLAGGMFLQWLLGPLSDRIGRRPVMLAGVVWFIVTCLATLLAKNIEQFTFLRFLQGISLCFIGAVGYAAIQESFEEAVCIKITALMANVALIAPLLGPLVGAAWVHVLPWEGMFILFAALAAIAFFGLQRAMPETATRRGETLSFKALGRDYRLVIKNRRFVAGALALGFVSLPLLAWIAQSPIIIISGEQLSSYEYGLLQVPVFGALIAGNLVLARLTSRRTVRSLIVMGGWPIVAGLIIAAAATVVSSHAYLWMTAGLSVYAFGIGLANAGLVRLTLFSSDMSKGTVSAAMGMLQMLIFTVGIEVSKHAWLSGGNGLFSLFNLANGILWLLLMLVFL…	MQNKLASGARLGRQALLFPLCLVLYEFSTYIGNDMRQPGMLENVEQYQAGIEWVPTSMNAYLAGGMFIQWLLGPLSDRIGRRPVMLAGVVWFIVTCLAILLAQNIEQFTLLRFLHGISLCFIGAVGYDAIQESFEEAVCIKITALMANVALIAPLLGPLVGASWIHVLPWEGMFVLFAALAAISFFGLQRAMPETATRIGEKLSLKELGRDYKLVLKNGRFVAGALALGFLSLPLLAWIAQSPIIIITGEQLSSYEYGLLQVPIFGALIAGNLLLARLTSRRTVRSLIIMGGWPIMIGLLVAAAATVISSHAYLWMTAGLSIYAFGIGLANAGLVRLTLFASVMSKGTVSAAMGMLQMLIFTVGIEISKHAWLNGGNGLFNLFNLVNGILLLSLMVIFL…	100	gnl|BL_ORD_ID|2417|hsp_num:0	37			0	1221	tetracycline; benzalkonium chloride
	1_3057 # 3212395 # 3213072 # 1 # ID=1_3057;partial=00;start_type=GTG;rbs_motif=GAGGA;rbs_spacer=3bp;gc_cont=0.563	1_3057	3212395	3213072	+	Strict	400	422.9	kdpE	91.96	3003841	protein homolog model	n/a	n/a	aminoglycoside antibiotic	antibiotic efflux	kdpDE	GTGACAAACGTTCTGATTGTTGAAGATGAACAGGCCATCCGCCGCTTTCTGCGCGCCGCGCTGGAAGGCGACGGCCTGCGCGTGTATGAAGCTGAAACATTACAACGTGGTTTACTGGAAGCCGCCACGCGAAAGCCCGATCTGATTATTCTCGATCTCGGCCTGCCGGACGGCGACGGAATCGATTTCATTCGCGACCTGCGTCAGTGGAGCGCAATACCGGTGATTGTCCTTTCCGCCCGCAGCGAAGAAAGCGATAAGATTGCCGCGCTTGACGCCGGAGCTGATGATTACCTGAGCAAGCCATTCGGCATTGGCGAGTTGCAGGCGCGTTTGCGTGTCGCGCTGCGACGGCACGCCGCCAGCCCTAGCGCCGATCCGATCGTCCGTTTTTCCGGC…	MTNVLIVEDEQAIRRFLRAALEGDGLRVYEAETLQRGLLEAATRKPDLIILDLGLPDGDGIDFIRDLRQWSAIPVIVLSARSEESDKIAALDAGADDYLSKPFGIGELQARLRVALRRHAASPSADPIVRFSGVTVDLAARLIHRGDEEIHLTPIEFRLLAVLLNNTGKVLTQRQLLNQVWGPNAVEHSHYLRIYMGHLRQKLEQDPTRPRHFITETGIGYRFMP	MTNVLIVEDEQAIRRFLRTALEGDGMRVFEAETLQRGLLEAATRKPDLIILDLGLPDGDGIEFIRDLRQWSAVPVIVLSARSEESDKIAALDAGADDYLSKPFGIGELQARLRVALRRHSATTAPDPLVKFSDVTVDLAARVIHRGEEEVHLTPIEFRLLAVLLNNAGKVLTQRQLLNQVWGPNAVEHSHYLRIYMGHLRQKLEQDPARPRHFITETGIGYRFML	100	gnl|BL_ORD_ID|2101|hsp_num:0	2331			0	672	kanamycin A
	1_3272 # 3438484 # 3439677 # 1 # ID=1_3272;partial=00;start_type=ATG;rbs_motif=GAGG;rbs_spacer=7bp;gc_cont=0.554	1_3272	3438484	3439677	+	Strict	670	691	Escherichia coli acrA	91.69	3004043	protein homolog model	n/a	n/a	fluoroquinolone antibiotic; cephalosporin; glycylcycline; penam; tetracycline antibiotic; rifamycin antibiotic; phenicol antibiotic; disinfecting agents and antiseptics	antibiotic efflux	resistance-nodulation-cell division (RND) antibiotic efflux pump	ATGAACAAAAACAGAGGGTTAACGCCTCTGGCGGTCGTTCTGATGCTCTCAGGCAGCTTAGCGCTAACAGGATGTGACGACAAACAGGACCAGCAAGGCGGCCAGCAGATGCCAGAAGTTGGAGTTGTCACACTAAAAACGGAACCACTGCAAATCACAACTGAACTTCCGGGTCGTACCGTTGCTTACCGTATCGCCGAAGTTCGCCCACAGGTAAGCGGCATTATCCTGAAGCGTAATTTCGTTGAGGGAAGTGATATCGAAGCGGGAGTCTCTCTCTATCAGATTGATCCTGCGACCTACCAGGCGACTTACGACAGCGCTAAGGGCGATCTGGCAAAAGCGCAGGCCGCCGCGAATATCGCTGAACTGACGGTGAAGCGTTATCAAAAGCTGCTG…	MNKNRGLTPLAVVLMLSGSLALTGCDDKQDQQGGQQMPEVGVVTLKTEPLQITTELPGRTVAYRIAEVRPQVSGIILKRNFVEGSDIEAGVSLYQIDPATYQATYDSAKGDLAKAQAAANIAELTVKRYQKLLGTQYISKQEYDQALADAQQATAAVVAAKAAVETARINLAYTKVTSPISGRIGKSSVTEGALVQNGQASALATVQQLDPIYVDVTQSSNDFLRLKQELANGSLKQENGKAKVDLVTSDGIKFPQSGTLEFSDVTVDQTTGSITLRAIFPNPDHTLLPGMFVRARLQEGTKPTALLVPQQGVTRTPRGDATVLVVGADNKVETRQIVASQAIGDKWLVTDGLKAGDRVVVSGLQKVRPGAQVKVQEITADNKQQAASGDQPAQPRS	MNKNRGFTPLAVVLMLSGSLALTGCDDKQAQQGGQQMPAVGVVTVKTEPLQITTELPGRTSAYRIAEVRPQVSGIILKRNFKEGSDIEAGVSLYQIDPATYQATYDSAKGDLAKAQAAANIAQLTVNRYQKLLGTQYISKQEYDQALADAQQANAAVTAAKAAVETARINLAYTKVTSPISGRIGKSNVTEGALVQNGQATALATVQQLDPIYVDVTQSSNDFLRLKQELANGTLKQENGKAKVSLITSDGIKFPQDGTLEFSDVTVDQTTGSITLRAIFPNPDHTLLPGMFVRARLEEGLNPNAILVPQQGVTRTPRGDATVLVVGADDKVETRPIVASQAIGDKWLVTEGLKAGDRVVISGLQKVRPGVQVKAQEVTADNNQQAASGAQPEQSKS	100	gnl|BL_ORD_ID|2319|hsp_num:0	2661			0	1191	tigecycline; tetracycline; rifampin; chloramphenicol; ampicillin; cefalotin; triclosan
	1_3273 # 3439700 # 3442849 # 1 # ID=1_3273;partial=00;start_type=ATG;rbs_motif=AGGAG;rbs_spacer=10bp;gc_cont=0.543	1_3273	3439700	3442849	+	Strict	1900	1902.5	acrB	94.66	3000216	protein homolog model	n/a	n/a	fluoroquinolone antibiotic; cephalosporin; glycylcycline; penam; tetracycline antibiotic; rifamycin antibiotic; phenicol antibiotic; disinfecting agents and antiseptics	antibiotic efflux	resistance-nodulation-cell division (RND) antibiotic efflux pump	ATGCCTAATTTCTTTATCGATCGCCCTATATTTGCGTGGGTGATCGCCATCATCATCATGTTGGCAGGGGGGCTCGCGATCCTCAAATTGCCGGTAGCGCAATATCCGACGATTGCGCCACCAGCAGTGACGATCTCCGCAACCTACCCTGGCGCTGATGCGAAAACGGTACAGGATACCGTCACGCAGGTTATCGAACAGAATATGAACGGTATCGATAACCTGATGTATATGTCCTCCAACAGTGACTCCACGGGGACCGTGCAGATCACGCTGACCTTTGAATCCGGCACCGATGCGGATATCGCGCAGGTTCAGGTTCAGAACAAGTTGCAACTGGCAATGCCTTTACTTCCCCAGGAAGTACAGCAACAGGGCGTGAGCGTTGAGAAGTCCTCA…	MPNFFIDRPIFAWVIAIIIMLAGGLAILKLPVAQYPTIAPPAVTISATYPGADAKTVQDTVTQVIEQNMNGIDNLMYMSSNSDSTGTVQITLTFESGTDADIAQVQVQNKLQLAMPLLPQEVQQQGVSVEKSSSSFLMVVGVINTDGTMTQEDISDYVAANMKDPISRTSGVGDVQLFGSQYAMRIWMNPTELTKYQLTPVDVINAIKAQNAQVAAGQLGGTPPVKGQQLNASIIAQTRLTSTDEFGKILLKVNQDGSQVRLRDVAKIELGGENYDVIAKFNGQPASGLGIKLATGANALDTATAIRAELKKMEPFFPPGMKIVYPYDTTPFVKISIHEVVKTLVEAIILVFLVMYLFLQNFRATLIPTIAVPVVLLGTFAVLAAFGFSINTLTMFGMV…	MPNFFIDRPIFAWVIAIIIMLAGGLAILKLPVAQYPTIAPPAVTISASYPGADAKTVQDTVTQVIEQNMNGIDNLMYMSSNSDSTGTVQITLTFESGTDADIAQVQVQNKLQLAMPLLPQEVQQQGVSVEKSSSSFLMVVGVINTDGTMTQEDISDYVAANMKDAISRTSGVGDVQLFGSQYAMRIWMNPNELNKFQLTPVDVITAIKAQNAQVAAGQLGGTPPVKGQQLNASIIAQTRLTSTEEFGKILLKVNQDGSRVLLRDVAKIELGGENYDIIAEFNGQPASGLGIKLATGANALDTAAAIRAELAKMEPFFPSGLKIVYPYDTTPFVKISIHEVVKTLVEAIILVFLVMYLFLQNFRATLIPTIAVPVVLLGTFAVLAAFGFSINTLTMFGMV…	100	gnl|BL_ORD_ID|1011|hsp_num:0	1104			0	3144	tigecycline; acriflavine; tetracycline; rifampin; chloramphenicol; ampicillin; cefalotin; triclosan, colistin?
	1_3368 # 3537430 # 3538542 # 1 # ID=1_3368;partial=00;start_type=ATG;rbs_motif=None;rbs_spacer=None;gc_cont=0.517	1_3368	3537430	3538542	+	Strict	250	261.2	vanG	38.87	3002909	protein homolog model	n/a	n/a	glycopeptide antibiotic	antibiotic target alteration	glycopeptide resistance gene cluster; Van ligase	ATGGAATGGGTTTTTAAGATGGCGAAATTGCGGGTAGGAATAGTATTTGGCGGTAAGTCGGCGGAACATGAAGTGTCTTTGCAATCAGCGAAAAATATCGTTGATGCGATCGATAAAACCCGCTTCGACGTGGTGCTGTTAGGGATAGATAAGGCGGGACAATGGCATGTTAACGATGCGGAAAATTATTTGCAGAATGCAGACGATCCGGCACATATCGCGCTACGTCCTTCGGCAATCAGTCTGGCCCAGGTGCCTGGCAAACATCAACACCAATTGATTAACGCCCAGAACGGGCAGCCGCTACCGACGGTAGATGTTATTTTTCCTATCGTCCACGGTACGCTGGGCGAAGACGGCTCATTGCAGGGGATGCTGCGCGTCGCAAACTTACCGTTT…	MEWVFKMAKLRVGIVFGGKSAEHEVSLQSAKNIVDAIDKTRFDVVLLGIDKAGQWHVNDAENYLQNADDPAHIALRPSAISLAQVPGKHQHQLINAQNGQPLPTVDVIFPIVHGTLGEDGSLQGMLRVANLPFVGSDVLSSAACMDKDIAKRLLRDAGLNIAPFITLTRTNRHAFSFAEVESRLGLPLFVKPANQGSSVGVSKVANEAQYQQAVALAFEFDHKVVVEQGIKGREIECAVLGNDNPQASTCGEIVLNSEFYAYDTKYIDDNGAQVVVPAQLPSGVNDKIRAIAIQAYQTLGCAGMARVDVFLTADNEVVINEINTLPGFTNISMYPKLWQASGLGYTDLISRLIELALERHTANNALKTTM	MQNKKIAVIFGGNSTEYEVSLQSASAVFENINTNKFDIIPIGITRSGEWYHYTGEKEKILNNTWFEDSKNLCPVVVSQNRSVKGFLEIASDKYRIIKVDLVFPVLHGKNGEDGTLQGIFELAGIPVVGCDTLSSALCMDKDRAHKLVSLAGISVPKSVTFKRFNEEAAMKEIEANLTYPLFIKPVRAGSSFGITKVIEKQELDAAIELAFEHDTEVIVEETINGFEVGCAVLGIDELIVGRVDEIELSSGFFDYTEKYTLKSSKIYMPARIDAEAEKRIQEAAVTIYKALGCSGFSRVDMFYTPSGEIVFNEVNTIPGFTSHSRYPNMMKGIGLSFSQMLDKLIGLYVE	106.02	gnl|BL_ORD_ID|1069|hsp_num:0	1157			0	1047	vancomycin
	1_3394 # 3570838 # 3571302 # -1 # ID=1_3394;partial=00;start_type=ATG;rbs_motif=AGGAG;rbs_spacer=7bp;gc_cont=0.544	1_3394	3570838	3571302	-	Perfect	290	310.1	golS	100	3000504	protein homolog model	n/a	n/a	monobactam; carbapenem; cephalosporin; cephamycin; penam; phenicol antibiotic; penem	antibiotic efflux	resistance-nodulation-cell division (RND) antibiotic efflux pump	ATGAACATCGGTAAAGCAGCTAAAGCATCGAAAGTCTCGGCCAAAATGATTCGCTACTATGAACAGATTGGTCTGATTCCCGCGGCAAGTCGGACGGATTCCGGCTATCGGGCCTATACCCAGGCTGATGTTAATCAATTGCATTTTATACGCCGCGCGCGCGACCTCGGTTTTTCAGTTGCTGAAATCAGCGACTTACTGAATCTTTGGAATAACCAGTCGCGGCAAAGCGCTGACGTCAAACGCCTGGCGCAGACGCACATTGATGAACTGGACAGACGTATCCAGAACATGCAGCACATGGCGCAAACCCTCAAAGCGCTGATTCACTGCTGCGCCGGCGACGCGCTGCCAGATTGTCCCATTCTGCATACGCTTGGACAACCTGACGATAGCGAG…	MNIGKAAKASKVSAKMIRYYEQIGLIPAASRTDSGYRAYTQADVNQLHFIRRARDLGFSVAEISDLLNLWNNQSRQSADVKRLAQTHIDELDRRIQNMQHMAQTLKALIHCCAGDALPDCPILHTLGQPDDSEPEARTGAVLRRPRRHGLAKRL	MNIGKAAKASKVSAKMIRYYEQIGLIPAASRTDSGYRAYTQADVNQLHFIRRARDLGFSVAEISDLLNLWNNQSRQSADVKRLAQTHIDELDRRIQNMQHMAQTLKALIHCCAGDALPDCPILHTLGQPDDSEPEARTGAVLRRPRRHGLAKRL	100	gnl|BL_ORD_ID|36|hsp_num:0	44			0	462	chloramphenicol
	1_3397 # 3575102 # 3578269 # 1 # ID=1_3397;partial=00;start_type=ATG;rbs_motif=AGG;rbs_spacer=10bp;gc_cont=0.567	1_3397	3575102	3578269	+	Strict	750	1209.9	adeF	60.67	3000777	protein homolog model	n/a	n/a	fluoroquinolone antibiotic; tetracycline antibiotic	antibiotic efflux	resistance-nodulation-cell division (RND) antibiotic efflux pump	ATGAAATTCACCCACTTTTTCATTGCACGACCCATCTTCGCCATCGTCCTGTCGCTGTTAATGCTGCTGGCTGGCGCTATCGCCTTTTTAAAACTGCCGCTGAGTGAATATCCGGCCGTTACGCCGCCCACGGTACAGGTTAGCGCCAGCTACCCCGGCGCTAACCCGCAAGTGATTGCCGATACGGTAGCCGCGCCGCTGGAACAGGTGATCAACGGCGTTGACGGCATGTTGTATATGAATACCCAGATGGCCATTGATGGTCGCATGGTTATCTCTATCGCCTTCGAACAGGGAACCGATCCTGATATGGCGCAAATTCAGGTGCAAAACCGGGTATCCCGCGCGCTGCCTCGCCTGCCCGAAGAAGTCCAGCGAATTGGCGTTGTAACGGAGAAA…	MKFTHFFIARPIFAIVLSLLMLLAGAIAFLKLPLSEYPAVTPPTVQVSASYPGANPQVIADTVAAPLEQVINGVDGMLYMNTQMAIDGRMVISIAFEQGTDPDMAQIQVQNRVSRALPRLPEEVQRIGVVTEKTSPDMLMVVHLVSPQKRYDSLYLSNFAIRQVRDELARLPGVGDVLVWGAGEYAMRVWLDPAKIANRGLTASDIVTALREQNVQVAAGSVGQQPEASAAFQMTVNTLGRLTSEEQFGEIVVKIGADGEVTRLRDVARVTLGADAYTLRSLLNGEAAPALQIIQSPGANAIDVSNAIRGKMDELQQNFPQDIEYRIAYDPTVFVRASLQSVAITLLEALVLVVLVVVLFLQTWRASIIPLVAVPVSLVGTFALMHLFGFSLNTLSLFG…	MNISKFFIDRPIFAGVLSVLILLAGLLSVFQLPISEYPEVVPPSVVVRAQYPGANPKVIAETVASPLEESINGVEDMLYMQSQANSDGNLTITVNFKLGIDPDKAQQLVQNRVSQAMPRLPEDVQRLGVTTLKSSPTLTMVVHLTSPDNRYDMTYLRNYAVLNVKDRLARLQGVGEVGLFGSGDYAMRVWLDPQKVAQRNLTATEIVNAIREQNIQVAAGTIGASPSNSPLQLSVNAQGRLTTEQEFADIILKTAPDGAVTRLGDVARVELAASQYGLRSLLDNKQAVAIPIFQAPGANALQVSDQVRSTMKELSKDFPSSIKYDIVYDPTQFVRASIKAVVHTLLEAITLVVVVVILFLQTWRASIIPLLAVPVSIIGTFALMLAFGYSINALSLFGM…	99.62	gnl|BL_ORD_ID|133|hsp_num:0	153			0	3126	tetracycline
	1_3612 # 3815966 # 3816910 # -1 # ID=1_3612;partial=00;start_type=ATG;rbs_motif=GGAG;rbs_spacer=6bp;gc_cont=0.476	1_3612	3815966	3816910	-	Strict	500	562	leuO	86.62	3003843	protein homolog model	n/a	n/a	nucleoside antibiotic; disinfecting agents and antiseptics	antibiotic efflux	major facilitator superfamily (MFS) antibiotic efflux pump	ATGCCAGAGGTCAAAACCGAAAAGCCGCATCTTTTAGATATGGGCAAACCACAGCTTCGCATGGTTGATTTGAACCTATTGACCGTGTTCGATGCGGTAATGCAAGAGCAGAATATTACGCGCGCCGCCCACACGCTGGGAATGTCGCAGCCTGCGGTCAGTAACGCCGTAGCGCGTCTGAAGGTTATGTTTAATGACGAACTTTTTGTTCGATATGGACGAGGAATTCAGCCGACTGCCCGTGCATTTCAGTTATTTGGTTCAGTCCGTCAGGCGTTACAATTGGTGCAAAATGAATTGCCGGGATCGGGGTTTGAGCCGACCAGCAGCGAACGTGTATTCAATCTTTGCGTGTGCAGTCCGCTGGATAATATCCTGACGTCACAGATTTATAATCGT…	MPEVKTEKPHLLDMGKPQLRMVDLNLLTVFDAVMQEQNITRAAHTLGMSQPAVSNAVARLKVMFNDELFVRYGRGIQPTARAFQLFGSVRQALQLVQNELPGSGFEPTSSERVFNLCVCSPLDNILTSQIYNRVEKIAPNIHVVFKASLNQNTEHQLRYQETEFVISYEEFRRPEFTSVPLFKDEMVLVASRKHPRISGPLLEGDVYNEQHAVVSLDRYASFSQPWYDTPDKQSSVAYQGMVLISVLNVVSQTHLVAIAPRWLAEEFAESLDLQILPLPLKLNSRTCYLSWHEAAGRDKGHQWMEDLLVSVCKR	MPEVQTDHPETAELSKPQLRMVDLNLLTVFDAVMQEQNITRAAHALGMSQPAVSNAVARLKVMFNDELFVRYGRGIQPTARAFQLFGSVRQALQLVQNELPGSGFEPASSERVFHLCVCSPLDSILTSQIYNHIEQIAPNIHVMFKSSLNQNTEHQLRYQETEFVISYEDFHRPEFTSVPLFKDEMVLVASKNHPTIKGPLLKHDVYNEQHAAVSLDRFASFSQTWYDTVDKQASIAYQGMAMMSVLSVVSQTHLVAIAPRWLAEEFAESLELQVLPLPLKQNSRTCYLSWHEAAGRDKGHQWMEEQLVSICKR	100	gnl|BL_ORD_ID|4919|hsp_num:0	5921			0	942	acriflavine; puromycin
	1_54 # 57532 # 58923 # 1 # ID=1_54;partial=00;start_type=ATG;rbs_motif=AGGAG;rbs_spacer=6bp;gc_cont=0.552	1_54	57532	58923	+	Strict	850	867.1	Escherichia coli UhpT with mutation conferring resistance to fosfomycin	95.68	3003890	protein variant model	E350Q	n/a	phosphonic acid antibiotic	antibiotic target alteration	antibiotic-resistant UhpT	ATGCTGGCCTTCTTAAACCAGGTGCGCAAGCCGACCCTGGATCTGCCGCTCGATGTGCGGCGTAAAATGTGGTTCAAGCCGTTCATGCAGTCCTATCTGGTGGTTTTTATCGGCTACCTGACCATGTACCTGATCCGCAAAAACTTTAACATCGCGCAGAACGACATGATTTCTACCTACGGGTTGAGCATGACCGAGCTGGGGATGATTGGCCTGGGCTTCTCGATCACCTACGGCGTGGGGAAAACGCTGGTTTCCTACTACGCTGACGGTAAAAATACCAAGCAGTTTCTACCGTTTATGTTGATCCTCTCCGCTATCTGTATGCTCGGCTTCAGCGCCAGCATGGGCGCGGGGTCAACCAGTCTGTTTCTGATGATCGCTTTCTATGCCCTGAGC…	MLAFLNQVRKPTLDLPLDVRRKMWFKPFMQSYLVVFIGYLTMYLIRKNFNIAQNDMISTYGLSMTELGMIGLGFSITYGVGKTLVSYYADGKNTKQFLPFMLILSAICMLGFSASMGAGSTSLFLMIAFYALSGFFQSTGGSCSYSTITKWTPRRKRGTFLGFWNISHNLGGAGAAGVALFGANYLFDGHVIGMFIFPSIIALIVGFIGLRFGSDSPESYGLGKAEELFGEEISEEDKETEENEMTKWQIFVEYVLKNKVIWLLCFSNIFLYVVRIGIDQWSTVYAFQELKLSKEVAIQGFTLFEVGALVGTLLWGWLSDLANGRRALVACVALALIIATLGVYQHASNQYVYLASLFALGFLVFGPQLLIGVAAVGFVPKKAIGAADGIKGTFAYLIG…	MLAFLNQVRKPTLDLPLEVRRKMWFKPFMQSYLVVFIGYLTMYLIRKNFNIAQNDMISTYGLSMTQLGMIGLGFSITYGVGKTLVSYYADGKNTKQFLPFMLILSAICMLGFSASMGSGSVSLFLMIAFYALSGFFQSTGGSCSYSTITKWTPRRKRGTFLGFWNISHNLGGAGAAGVALFGANYLFDGHVIGMFIFPSIIALIVGFIGLRYGSDSPESYGLGKAEELFGEEISEEDKETESTDMTKWQIFVEYVLKNKVIWLLCFANIFLYVVRIGIDQWSTVYAFQELKLSKAVAIQGFTLFEAGALVGTLLWGWLSDLANGRRGLVACIALALIIATLGVYQHASNEYIYLASLFALGFLVFGPQLLIGVAAVGFVPKKAIGAADGIKGTFAYLIG…	100	gnl|BL_ORD_ID|2126|hsp_num:0	2373			0	1389	fosfomycin
	1_390 # 438579 # 439763 # 1 # ID=1_390;partial=00;start_type=GTG;rbs_motif=AGGA;rbs_spacer=8bp;gc_cont=0.545	1_390	438579	439763	+	Strict	700	786.9	Escherichia coli EF-Tu mutants conferring resistance to Pulvomycin	99.49	3003369	protein variant model	R234F	n/a	elfamycin antibiotic	antibiotic target alteration	elfamycin resistant EF-Tu	GTGTCTAAAGAAAAATTTGAACGTACAAAACCGCACGTTAACGTCGGCACCATCGGCCACGTTGACCACGGTAAAACTACCCTGACCGCTGCAATCACCACCGTACTGGCTAAAACCTACGGCGGTGCTGCTCGTGCATTCGACCAGATCGATAACGCGCCGGAAGAAAAAGCGCGTGGTATCACCATCAACACTTCTCACGTTGAATACGATACCCCGACCCGCCACTACGCACACGTAGACTGCCCGGGGCACGCCGACTATGTTAAAAACATGATCACCGGTGCTGCTCAGATGGACGGCGCGATCCTGGTTGTTGCTGCGACTGACGGCCCGATGCCGCAGACCCGTGAGCACATCCTGCTGGGTCGTCAGGTAGGCGTTCCGTACATCATCGTG…	MSKEKFERTKPHVNVGTIGHVDHGKTTLTAAITTVLAKTYGGAARAFDQIDNAPEEKARGITINTSHVEYDTPTRHYAHVDCPGHADYVKNMITGAAQMDGAILVVAATDGPMPQTREHILLGRQVGVPYIIVFLNKCDMVDDEELLELVEMEVRELLSQYDFPGDDTPIVRGSALKALEGDAEWEAKIIELAGFLDSYIPEPERAIDKPFLLPIEDVFSISGRGTVVTGRVERGIIKVGEEVEIVGIKETQKSTCTGVEMFRKLLDEGRAGENVGVLLRGIKREEIERGQVLAKPGTIKPHTKFESEVYILSKDEGGRHTPFFKGYRPQFYFRTTDVTGTIELPEGVEMVMPGDNIKMVVTLIHPIAMDDGLRFAIREGGRTVGAGVVAKVLG	MLSPEGESTIVRNIAVSKEKFERTKPHVNVGTIGHVDHGKTTLTAAITTVLAKTYGGAARAFDQIDNAPEEKARGITINTSHVEYDTPTRHYAHVDCPGHADYVKNMITGAAQMDGAILVVAATDGPMPQTREHILLGRQVGVPYIIVFLNKCDMVDDEELLELVEMEVRELLSQYDFPGDDTPIVRGSALKALEGDAEWEAKILELAGFLDSYIPEPERAIDKPFLLPIEDVFSISGRGTVVTGRVERGIIKVGEEVEIVGIKETQKSTCTGVEMFRKLLDEGRAGENVGVLLRGIKREEIERGQVLAKPGTIKPHTKFESEVYILSKDEGGRHTPFFKGYRPQFYFRTTDVTGTIELPEGVEMVMPGDNIKMVVTLIHPIAMDDGLRFAIREGGRTV…	96.33	gnl|BL_ORD_ID|1969|hsp_num:0	2158			45	1227	pulvomycin
	1_1453 # 1567453 # 1568811 # 1 # ID=1_1453;partial=00;start_type=ATG;rbs_motif=GGAG;rbs_spacer=8bp;gc_cont=0.548	1_1453	1567453	1568811	+	Strict	850	898.7	Escherichia coli GlpT with mutation conferring resistance to fosfomycin	96.9	3003889	protein variant model	E448K	n/a	phosphonic acid antibiotic	antibiotic target alteration	antibiotic-resistant GlpT	ATGTTGAGTATTTTTAAACCAGCGCCGCATAAAGCGCGCTTGCCAGCGGCGGAGATTGATCCGACCTATCGCCGATTACGCTGGCAGATTTTCCTGGGGATATTCTTTGGCTATGCCGCGTATTATCTGGTGCGCAAGAACTTTGCCCTCGCGATGCCCTACCTGGTAGAACAGGGTTTTTCACGCGGCGATCTGGGCTTTGCGTTGTCCGGGATTTCCATCGCTTATGGTTTTTCGAAATTTATAATGGGTTCGGTGTCCGATCGCTCGAATCCGCGCGTTTTTCTGCCGGCAGGGTTGATTCTGGCCGCAGCAGTCATGTTGTTTATGGGCTTTGTGCCGTGGGCGACATCCAGCATCGCCGTGATGTTTGTGCTGTTGTTCCTTTGCGGCTGGTTC…	MLSIFKPAPHKARLPAAEIDPTYRRLRWQIFLGIFFGYAAYYLVRKNFALAMPYLVEQGFSRGDLGFALSGISIAYGFSKFIMGSVSDRSNPRVFLPAGLILAAAVMLFMGFVPWATSSIAVMFVLLFLCGWFQGMGWPPCGRTMVHWWSQKERGGIVSVWNCAHNVGGGIPPLLFLLGMAWFNDWKAALYMPAFGAIVVALFAFAMMRDTPQSCGLPPIEEYKNDYPDDYNEKAEEELTAKQIFMQYVLPNKLLWYIAIANVFVYLLRYGILDWSPTYLKEVKHFALDKSSWAYFLYEYAGIPGTLLCGWMSDKVFRGNRGATGVFFMTLVTIATIVYWMNPAGNPNVDMACMIIIGFLIYGPVMLIGLHALELAPKKAAGTAAGFTGLFGYLGGSVA…	MLSIFKPAPHKARLPAAEIDPTYRRLRWQIFLGIFFGYAAYYLVRKNFALAMPYLVEQGFSRGDLGFALSGISIAYGFSKFIMGSVSDRSNPRVFLPAGLILAAAVMLFMGFVPWATSSIAVMFVLLFLCGWFQGMGWPPCGRTMVHWWSQKERGGIVSVWNCAHNVGGGIPPLLFLLGMAWFNDWHAALYMPAFCAILVALFAFAMMRDTPQSCGLPPIEEYKNDYPDDYNEKAEQELTAKQIFMQYVLPNKLLWYIAIANVFVYLLRYGILDWSPTYLKEVKHFALDKSSWAYFLYEYAGIPGTLLCGWMSDKVFRGNRGATGVFFMTLVTIATIVYWMNPAGNPTVDMICMIVIGFLIYGPVMLIGLHALELAPKKAAGTAAGFTGLFGYLGGSVA…	100	gnl|BL_ORD_ID|2127|hsp_num:0	2372			0	1356	fosfomycin
	1_1464 # 1581069 # 1583705 # 1 # ID=1_1464;partial=00;start_type=ATG;rbs_motif=GGA;rbs_spacer=10bp;gc_cont=0.559	1_1464	1581069	1583705	+	Strict	1500	1679.5	Salmonella enterica gyrA conferring resistance to fluoroquinolones	99.89	3003926	protein variant model	D87Y	D87Y:1545	fluoroquinolone antibiotic	antibiotic target alteration	fluoroquinolone resistant gyrA	ATGAGCGACCTTGCGAGAGAAATTACACCGGTCAACATTGAGGAAGAGCTGAAAAGCTCCTATCTGGATTATGCGATGTCGGTCATTGTTGGCCGTGCGCTGCCGGATGTCCGAGATGGCCTGAAGCCGGTACACCGTCGCGTACTTTACGCCATGAACGTATTGGGCAATGACTGGAACAAAGCCTATAAAAAATCTGCCCGTGTCGTTGGTGACGTAATCGGTAAATACCATCCCCACGGCGATTCCGCAGTGTATTACACCATCGTTCGTATGGCGCAGCCATTCTCGCTGCGTTACATGCTGGTGGATGGTCAGGGTAACTTCGGTTCTATTGACGGCGACTCCGCGGCGGCAATGCGTTATACGGAGATCCGTCTGGCGAAAATCGCCCACGAA…	MSDLAREITPVNIEEELKSSYLDYAMSVIVGRALPDVRDGLKPVHRRVLYAMNVLGNDWNKAYKKSARVVGDVIGKYHPHGDSAVYYTIVRMAQPFSLRYMLVDGQGNFGSIDGDSAAAMRYTEIRLAKIAHELMADLEKETVDFVDNYDGTEKIPDVMPTKIPNLLVNGSSGIAVGMATNIPPHNLTEVINGCLAYIDNEDISIEGLMEHIPGPDFPTAAIINGRRGIEEAYRTGRGKVYIRARAEVEADAKTGRETIIVHEIPYQVNKARLIEKIAELVKDKRVEGISALRDESDKDGMRIVIEVKRDAVGEVVLNNLYSQTQLQVSFGINMVALHHGQPKIMNLKDIISAFVRHRREVVTRRTIFELRKARDRAHILEALAIALANIDPIIELIRR…	MSDLAREITPVNIEEELKSSYLDYAMSVIVGRALPDVRDGLKPVHRRVLYAMNVLGNDWNKAYKKSARVVGDVIGKYHPHGDSAVYDTIVRMAQPFSLRYMLVDGQGNFGSIDGDSAAAMRYTEIRLAKIAHELMADLEKETVDFVDNYDGTEKIPDVMPTKIPNLLVNGSSGIAVGMATNIPPHNLTEVINGCLAYIDNEDISIEGLMEHIPGPDFPTAAIINGRRGIEEAYRTGRGKVYIRARAEVEADAKTGRETIIVHEIPYQVNKARLIEKIAELVKDKRVEGISALRDESDKDGMRIVIEVKRDAVGEVVLNNLYSQTQLQVSFGINMVALHHGQPKIMNLKDIISAFVRHRREVVTRRTIFELRKARDRAHILEALAIALANIDPIIELIRR…	100	gnl|BL_ORD_ID|2156|hsp_num:0	2403			0	2634	ciprofloxacin; nalidixic acid
	1_3605 # 3807987 # 3809753 # -1 # ID=1_3605;partial=00;start_type=ATG;rbs_motif=AGGA;rbs_spacer=12bp;gc_cont=0.547	1_3605	3807987	3809753	-	Strict	500	564.7	Haemophilus influenzae PBP3 conferring resistance to beta-lactam antibiotics	51.85	3004446	protein variant model	D350N, S357N	n/a	cephalosporin; cephamycin; penam	antibiotic target alteration	Penicillin-binding protein mutations conferring resistance to beta-lactam antibiotics	ATGAAAGCAGCGGCAAAAACGCAAAAATCGAAACGCCAGGAAGAACAGACCAACTTCATCAGTTGGCGTTTTGCGTTGCTGTGCGGCTGTATTTTACTGGCGCTGGTTTTTTTACTTGGACGCGCGGCGTGGCTACAGATTATCGCCCCGGATATGCTGGTGCGTCAGGGCGATATGCGTTCGCTGCGTGTTCAGGAAGTCTCCACCTCACGCGGTATGATTACCGACCGTTCCGGGCGTCCACTGGCGGTCAGCGTACCGGTTAAGGCGATCTGGGCCGACCCGAAAGAAGTTCATGACGCCGGCGGCATCAGCGTTGGCGATCGCTGGAAAGCGCTTTCTACTGCGCTCAATATTCCGCTCGATCAGCTCTCCGCCCGTATCAACGCCAACCCGAAA…	MKAAAKTQKSKRQEEQTNFISWRFALLCGCILLALVFLLGRAAWLQIIAPDMLVRQGDMRSLRVQEVSTSRGMITDRSGRPLAVSVPVKAIWADPKEVHDAGGISVGDRWKALSTALNIPLDQLSARINANPKGRFIYLARQVNPDMADYIKKLKLPGIHLREESRRYYPSGEVTAHLIGFTNVDSQGIEGVEKSFDKWLTGQPGERIVRKDRYGRVIEDISSTDSQAAHNLALSIDERLQALVYRELNNAVAFNKAESGSAVLVDVNTGEVLAMANSPSYNPNNLAGTPKDAMRNRTITDVFEPGSTVKPMVVMTALQRGIVNENTVLNTVPYRINGHEIKDVARYSELTLTGVLQKSSNVGVSKLALAMPSSALVDTYSRFGLGKATNLGLVGERSG…	MVKFNSSRKSGKSKKTIRKLTAPETVKQNKPQKVFEKCFMRGRYMLSTVLILLGLCALVARAAYVQSINADTLSNEADKRSLRKDEVLSVRGSILDRNGQLLSVSVPMSAIVADPKTMLKENSLADKERIAALAEELGMTENDLVKKIEKNSKSGYLYLARQVELSKANYIRRLKIKGIILETEHRRFYPRVEEAAHVVGYTDIDGNGIEGIEKSFNSLLVGKDGSRTVRKDKRGNIVAHISDEKKYDAQDVTLSIDEKLQSMVYREIKKAVSENNAESGTAVLVDVRTGEVLAMATAPSYNPNNRVGVKSELMRNRAITDTFEPGSTVKPFVVLTALQRGVVKRDEIIDTTSFKLSGKEIVDVAPRAQQTLDEILMNSSNRGVSRLALRMPPSALMET…	96.39	gnl|BL_ORD_ID|2491|hsp_num:0	2886			63	1758	ceftriaxone; ampicillin; cefaclor; cefotaxime; cefditoren; cefdinir
	1_4135 # 4403316 # 4404500 # -1 # ID=1_4135;partial=00;start_type=ATG;rbs_motif=GAGG;rbs_spacer=8bp;gc_cont=0.543	1_4135	4403316	4404500	-	Strict	700	786.9	Escherichia coli EF-Tu mutants conferring resistance to Pulvomycin	99.49	3003369	protein variant model	R234F	n/a	elfamycin antibiotic	antibiotic target alteration	elfamycin resistant EF-Tu	ATGTCTAAAGAAAAGTTTGAACGTACAAAACCGCACGTTAACGTCGGTACTATCGGCCACGTTGACCATGGTAAAACAACGCTGACCGCTGCCATTACTACCGTACTGGCTAAAACCTACGGCGGTGCCGCCCGCGCATTCGACCAGATCGATAACGCGCCGGAAGAAAAAGCGCGTGGTATCACCATCAACACTTCTCACGTTGAATACGATACCCCGACCCGCCACTACGCACACGTAGACTGCCCGGGGCACGCCGACTATGTTAAAAACATGATCACCGGTGCTGCTCAGATGGACGGCGCGATCCTGGTTGTTGCTGCGACTGACGGCCCGATGCCGCAGACCCGTGAGCACATCCTGCTGGGTCGTCAGGTAGGCGTTCCGTACATCATCGTG…	MSKEKFERTKPHVNVGTIGHVDHGKTTLTAAITTVLAKTYGGAARAFDQIDNAPEEKARGITINTSHVEYDTPTRHYAHVDCPGHADYVKNMITGAAQMDGAILVVAATDGPMPQTREHILLGRQVGVPYIIVFLNKCDMVDDEELLELVEMEVRELLSQYDFPGDDTPIVRGSALKALEGDAEWEAKIIELAGFLDSYIPEPERAIDKPFLLPIEDVFSISGRGTVVTGRVERGIIKVGEEVEIVGIKETQKSTCTGVEMFRKLLDEGRAGENVGVLLRGIKREEIERGQVLAKPGTIKPHTKFESEVYILSKDEGGRHTPFFKGYRPQFYFRTTDVTGTIELPEGVEMVMPGDNIKMVVTLIHPIAMDDGLRFAIREGGRTVGAGVVAKVLG	MLSPEGESTIVRNIAVSKEKFERTKPHVNVGTIGHVDHGKTTLTAAITTVLAKTYGGAARAFDQIDNAPEEKARGITINTSHVEYDTPTRHYAHVDCPGHADYVKNMITGAAQMDGAILVVAATDGPMPQTREHILLGRQVGVPYIIVFLNKCDMVDDEELLELVEMEVRELLSQYDFPGDDTPIVRGSALKALEGDAEWEAKILELAGFLDSYIPEPERAIDKPFLLPIEDVFSISGRGTVVTGRVERGIIKVGEEVEIVGIKETQKSTCTGVEMFRKLLDEGRAGENVGVLLRGIKREEIERGQVLAKPGTIKPHTKFESEVYILSKDEGGRHTPFFKGYRPQFYFRTTDVTGTIELPEGVEMVMPGDNIKMVVTLIHPIAMDDGLRFAIREGGRTV…	96.33	gnl|BL_ORD_ID|1969|hsp_num:0	2158			45	1227	pulvomycin
	1_1591 # 1721616 # 1722338 # -1 # ID=1_1591;partial=00;start_type=ATG;rbs_motif=GAG;rbs_spacer=6bp;gc_cont=0.537	1_1591	1721616	1722338	-	Strict	450	456.8	baeR	94.14	3000828	protein overexpression model	n/a	n/a	aminoglycoside antibiotic; aminocoumarin antibiotic	antibiotic efflux	resistance-nodulation-cell division (RND) antibiotic efflux pump	ATGACTGAATTACCCATTGATGAAAACACGCCGCGCATTTTGATTGTTGAAGATGAACCCAAGCTGGGTCAGCTGCTTATTGACTACTTACGCGCGGCGAGTTACGCCCCCACGCTCATCAATCACGGCGACAAGGTACTGCCGTATGTGCGTCAAACGCCGCCGGATCTGATTCTGCTGGATCTGATGCTGCCGGGTACCGATGGTCTGACGCTATGCCGGGAGATTCGCCGTTTTTCCGACATCCCCATTGTGATGGTCACAGCCAAAATTGAAGAGATCGACCGGCTGCTGGGGCTGGAAATCGGCGCCGATGATTATATCTGTAAGCCTTACAGCCCGCGCGAAGTCGTGGCCCGCGTGAAAACCATTTTGCGCCGCTGTAAACCGCAGCGCGAA…	MTELPIDENTPRILIVEDEPKLGQLLIDYLRAASYAPTLINHGDKVLPYVRQTPPDLILLDLMLPGTDGLTLCREIRRFSDIPIVMVTAKIEEIDRLLGLEIGADDYICKPYSPREVVARVKTILRRCKPQRELQQQDAESPLMIDESRFQASWCGKALDLTPAEFRLLKTLSLEPGKVFSREQLLNHLYDDYRVVTDRTIDSHIKNLRRKLESLDAEQSFIRAVYGVGYRWEADACRLV	MTELPIDENTPRILIVEDEPKLGQLLIDYLRAASYAPSLISHGDQVLPYVRQTPPDLILLDLMLPGTDGLTLCREIRRFSDVPIVMVTAKIEEIDRLLGLEIGADDYICKPYSPREVVARVKTILRRCKPQRELQVLDAESPLIVDESRFQASWRSKLLDLTPAEFRLLKTLSHEPGKVFSREQLLNHLYDDYRVVTDRTIDSHIKNLRRKLEALDAEQSFIRAVYGVGYRWEADACRIA	100	gnl|BL_ORD_ID|1382|hsp_num:0	1337			0	717	neomycin; amikacin; kanamycin A; tobramycin; novobiocin; gentamicin
	1_2192 # 2319687 # 2320121 # -1 # ID=1_2192;partial=00;start_type=TTG;rbs_motif=None;rbs_spacer=None;gc_cont=0.474	1_2192	2319687	2320121	-	Strict	210	273.5	Escherichia coli AcrAB-TolC with MarR mutations conferring resistance to ciprofloxacin and tetracycline	92.36	3003378	protein overexpression model	n/a	n/a	fluoroquinolone antibiotic; cephalosporin; glycylcycline; penam; tetracycline antibiotic; rifamycin antibiotic; phenicol antibiotic; disinfecting agents and antiseptics	antibiotic target alteration; antibiotic efflux	resistance-nodulation-cell division (RND) antibiotic efflux pump	TTGAAAAGCACCAGTGATCTGTTCAATGAAATCATTCCGCTGGGTCGCTTGATCTACATGGTAAATCAAAAAAAAGATCGCCTGTTAAATAACTATTTATCCCCGCTGGATATCACCGCAACACAGTTTAAAGTGCTTTGCTCGATACGCTGCGCGGGATGTATTACCCCGGTTGAACTTAAAAAAGTGCTGTCTGTCGATCTCGGCGCATTGACGCGAATGCTCGACCGCCTGCTGTGCAAAGGCTGGATCGAAAGACTGCCGAATCCTAATGACAAACGCGGCGTACTGGTGAAGCTAACGCCGGACGGCGCGGCAATTTGTGAGCAATGTCATCAACGACCAGGGCAAGACCTGCATCAGGAATTAACAAAAAACTTAACGGCGGACGAAGTGGCA…	LKSTSDLFNEIIPLGRLIYMVNQKKDRLLNNYLSPLDITATQFKVLCSIRCAGCITPVELKKVLSVDLGALTRMLDRLLCKGWIERLPNPNDKRGVLVKLTPDGAAICEQCHQRPGQDLHQELTKNLTADEVATLEYLLKKILP	MKSTSDLFNEIIPLGRLIHMVNQKKDRLLNEYLSPLDITAAQFKVLCSIRCAACITPVELKKVLSVDLGALTRMLDRLVCKGWVERLPNPNDKRGVLVKLTTGGAAICEQCHQLVGQDLHQELTKNLTADEVATLEYLLKKVLP	100	gnl|BL_ORD_ID|1983|hsp_num:0	431			0	432	tigecycline; ciprofloxacin; tetracycline; rifampin; chloramphenicol; ampicillin; cefalotin; triclosan
	1_4039 # 4274954 # 4275412 # -1 # ID=1_4039;partial=00;start_type=ATG;rbs_motif=AGG;rbs_spacer=11bp;gc_cont=0.549	1_4039	4274954	4275412	-	Strict	300	300.4	Escherichia coli soxR with mutation conferring antibiotic resistance	96.05	3003381	protein overexpression model	n/a	n/a	fluoroquinolone antibiotic; cephalosporin; glycylcycline; penam; tetracycline antibiotic; rifamycin antibiotic; phenicol antibiotic; disinfecting agents and antiseptics	antibiotic target alteration; antibiotic efflux	ATP-binding cassette (ABC) antibiotic efflux pump; major facilitator superfamily (MFS) antibiotic efflux pump; resistance-nodulation-cell division (RND) antibiotic efflux pump	ATGGAAAAAAAATCTCCCCGTTTAAAAGCCTTACTGACGCCGGGGGAAGTTGCGAAACGTAGCGGTGTTGCTGTGTCCGCCCTGCACTTCTATGAAAGCAAAGGGCTAATTACCAGTATCCGTAATAGCGGTAACCAACGGCGATACAAGCGTGACGTGTTGCGTTATGTCGCGATTATCAAGATCGCCCAGCGTATCGGCATCCCGCTGGCAACTATCGGCGACGCGTTTGGTATCTTGCCGGAAGGACATACGTTAAGCGCGAAAGAGTGGAAGCAGCTCTCCTCGCAGTGGCGCGAAGAGTTAGACCGACGTATTCATACGCTGGTGGCGTTGCGCGATGAGCTGGACGGTTGTATCGGCTGCGGCTGTTTATCGCGTAGCGACTGTCCGCTGCGA…	MEKKSPRLKALLTPGEVAKRSGVAVSALHFYESKGLITSIRNSGNQRRYKRDVLRYVAIIKIAQRIGIPLATIGDAFGILPEGHTLSAKEWKQLSSQWREELDRRIHTLVALRDELDGCIGCGCLSRSDCPLRNPGDRLGEHGTGARLLEDD	MEKKLPRIKALLTPGEVAKRSGVAVSALHFYESKGLITSIRNSGNQRRYKRDVLRYVAIIKIAQRIGIPLATIGEAFGVLPEGHTLSAKEWKQLSSQWREELDRRIHTLVALRDELDGCIGCGCLSRSDCPLRNPGDRLGEEGTGARLLEDEQN	98.7	gnl|BL_ORD_ID|1972|hsp_num:0	1005			0	456	tigecycline; ciprofloxacin; tetracycline; rifampin; chloramphenicol; ampicillin; nalidixic acid; norfloxacin; cefalotin; triclosan
	1_4040 # 4275499 # 4275822 # 1 # ID=1_4040;partial=00;start_type=ATG;rbs_motif=GAGG;rbs_spacer=7bp;gc_cont=0.515	1_4040	4275499	4275822	+	Strict	200	209.1	Escherichia coli soxS with mutation conferring antibiotic resistance	95.33	3003511	protein overexpression model	n/a	n/a	fluoroquinolone antibiotic; monobactam; carbapenem; cephalosporin; glycylcycline; cephamycin; penam; tetracycline antibiotic; rifamycin antibiotic; phenicol antibiotic; penem; disinfecting agents and antiseptics	antibiotic target alteration; antibiotic efflux; reduced permeability to antibiotic	ATP-binding cassette (ABC) antibiotic efflux pump; major facilitator superfamily (MFS) antibiotic efflux pump; resistance-nodulation-cell division (RND) antibiotic efflux pump; General Bacterial Porin with reduced permeability to beta-lactams	ATGTCGCATCAGCAGATAATTCAGACCCTTATCGAATGGATTGATGAACATATCGACCAACCGCTAAACATTGATGTGGTGGCAAAAAAATCGGGCTACTCCAAGTGGTATTTGCAGCGGATGTTTCGTACGGTAACGCATCAAACATTAGGCGAGTATATTCGCCAGCGCCGTCTCCTGTTGGCGGCCGTTGAGCTACGAACGACCGAGCGCCCGATTTTTGATATCGCGATGGACCTGGGCTATGTATCGCAGCAAACCTTCTCGCGTGTATTCCGCCGCGAGTTCGATCGCACTCCCAGCGATTACCGTCACCGCCTGTAG	MSHQQIIQTLIEWIDEHIDQPLNIDVVAKKSGYSKWYLQRMFRTVTHQTLGEYIRQRRLLLAAVELRTTERPIFDIAMDLGYVSQQTFSRVFRREFDRTPSDYRHRL	MSHQKIIQDLIAWIDEHIDQPLNIDVVAKKSGYSKWYLQRMFRTVTHQTLGDYIRQRRLLLAAVELRTTERPIFDIAMDLGYVSQQTFSRVFRRQFDRTPSDYRHRL	100	gnl|BL_ORD_ID|1974|hsp_num:0	2066			0	321	tigecycline; ciprofloxacin; tetracycline; rifampin; chloramphenicol; ampicillin; norfloxacin; cefalotin; triclosan; enrofloxacin

## Sheet: ID_SA608
Isolate ID	ORF_ID	Contig	Start	Stop	Orientation	Cut_Off	Pass_Bitscore	Best_Hit_Bitscore	Best_Hit_ARO	Best_Identities	ARO	Model_type	SNPs_in_Best_Hit_ARO	Other_SNPs	Drug Class	Resistance Mechanism	AMR Gene Family	Predicted_DNA	Predicted_Protein	CARD_Protein_Sequence	Percentage Length of Reference Sequence	ID	Model_ID	Nudged	Note	Hit_Start	Hit_End	Antibiotic
SA608	1_369 # 421789 # 422421 # -1 # ID=1_369;partial=00;start_type=ATG;rbs_motif=AGGA;rbs_spacer=9bp;gc_cont=0.506	1_369	421789	422421	-	Strict	400	418.3	CRP	99.05	3000518	protein homolog model	n/a	n/a	macrolide antibiotic; fluoroquinolone antibiotic; penam	antibiotic efflux	resistance-nodulation-cell division (RND) antibiotic efflux pump	ATGGTGCTTGGCAAACCGCAAACAGACCCGACTCTTGAATGGTTCTTGTCTCATTGCCACATTCATAAGTACCCGTCAAAGAGCACGCTGATTCACCAGGGTGAAAAAGCAGAAACGCTGTACTACATCGTTAAAGGCTCCGTGGCAGTGCTGATCAAAGATGAAGAAGGGAAAGAAATGATCCTTTCTTATCTGAATCAGGGTGATTTTATTGGTGAACTGGGCCTGTTTGAAGAAGGCCAGGAACGCAGCGCCTGGGTACGTGCGAAAACCGCATGTGAGGTCGCTGAAATTTCCTACAAAAAATTTCGCCAATTAATCCAGGTCAACCCGGATATTCTGATGCGCCTCTCTTCCCAGATGGCTCGTCGCTTACAAGTCACCTCTGAAAAAGTAGGT…	MVLGKPQTDPTLEWFLSHCHIHKYPSKSTLIHQGEKAETLYYIVKGSVAVLIKDEEGKEMILSYLNQGDFIGELGLFEEGQERSAWVRAKTACEVAEISYKKFRQLIQVNPDILMRLSSQMARRLQVTSEKVGNLAFLDVTGRIAQTLLNLAKQPDAMTHPDGMQIKITRQEIGQIVGCSRETVGRILKMLEDQNLISAHGKTIVVYGTR	MVLGKPQTDPTLEWFLSHCHIHKYPSKSKLIHQGEKAETLYYIVKGSVAVLIKDEEGKEMILSYLNQGDFIGELGLFEEGQERSAWVRAKTACEVAEISYKKFRQLIQVNPDILMRLSAQMARRLQVTSEKVGNLAFLDVTGRIAQTLLNLAKQPDAMTHPDGMQIKITRQEIGQIVGCSRETVGRILKMLEDQNLISAHGKTIVVYGTR	100	gnl|BL_ORD_ID|803|hsp_num:0	869			0	630	erythromycin; cloxacillin; oxacillin; norfloxacin
	1_662 # 692198 # 693019 # 1 # ID=1_662;partial=00;start_type=ATG;rbs_motif=AGG;rbs_spacer=9bp;gc_cont=0.536	1_662	692198	693019	+	Strict	500	511.5	bacA	97.07	3002986	protein homolog model	n/a	n/a	peptide antibiotic	antibiotic target alteration	undecaprenyl pyrophosphate related proteins	ATGAGCGATATGCACTCGCTGCTGATAGCGGCAATTTTGGGTGTGGTCGAAGGATTGACGGAGTTTTTGCCGGTATCCAGCACGGGCCATATGATTATTGTGGGTCATCTGCTGGGGTTTGAAGGCGATACGGCCAAGACATTCGAAGTGGTGATTCAACTTGGATCTATTCTGGCGGTCGTGGTGATGTTCTGGCGGCGGTTGTTTGGCCTCATCGGTATTCACTTTGGCCGCCCGCTACAGCGTGAAGGTGAAAGTAAAGGTCGATTAACGTTGATTCACATCCTGCTGGGCATGATTCCGGCGGTGGTGCTGGGGTTAGTCTTTCATGACACGATCAAGTCGCTATTTAACCCAATTAACGTGATGTACGCGCTGGTGGTAGGCGGTCTGTTGCTG…	MSDMHSLLIAAILGVVEGLTEFLPVSSTGHMIIVGHLLGFEGDTAKTFEVVIQLGSILAVVVMFWRRLFGLIGIHFGRPLQREGESKGRLTLIHILLGMIPAVVLGLVFHDTIKSLFNPINVMYALVVGGLLLIAAECLKPKEPRAPGLDDMTYRQAFMIGCFQCLALWPGFSRSGATISGGMLMGVSRYAASEFSFLLAVPMMMGATVLDLYKSWSFLTAADIPMFAVGFVTAFVVALIAIKTFLQLIKRISFIPFAIYRFVVAAAVYVVFF	MSDMHSLLIAAILGVVEGLTEFLPVSSTGHMIIVGHLLGFEGDTAKTFEVVIQLGSILAVVVMFWRRLFGLIGIHFGRPLQHEGESKGRLTLIHILLGMIPAVVLGLLFHDTIKSLFNPINVMYALVVGGLLLIAAECLKPKEPRAPGLDDMTYRQAFMIGCFQCLALWPGFSRSGATISGGMLMGVSRYAASEFSFLLAVPMMMGATALDLYKSWGFLTSGDIPMFAVGFITAFVVALIAIKTFLQLIKRISFIPFAIYRFIVAAAVYVVFF	100	gnl|BL_ORD_ID|1680|hsp_num:0	1820			0	819	bacitracin; bacitracin A; bacitracin B; bacitracin F
	1_1046 # 1095751 # 1095936 # 1 # ID=1_1046;partial=00;start_type=ATG;rbs_motif=AGGAG;rbs_spacer=6bp;gc_cont=0.511	1_1046	1095751	1095936	+	Strict	100	102.4	rsmA	85.25	3005069	protein homolog model	n/a	n/a	fluoroquinolone antibiotic; diaminopyrimidine antibiotic; phenicol antibiotic	antibiotic efflux	resistance-nodulation-cell division (RND) antibiotic efflux pump	ATGCTGATTCTGACTCGTCGAGTTGGTGAGACCCTCATGATTGGCGATGAGGTCACCGTGACAGTTTTAGGGGTGAAGGGCAACCAGGTGCGTATTGGCGTGAACGCCCCGAAAGAAGTTTCTGTCCATCGTGAAGAGATCTACCAGCGTATCCAGGCTGAAAAATCCCAGCAGTCCAGTTACTAA	MLILTRRVGETLMIGDEVTVTVLGVKGNQVRIGVNAPKEVSVHREEIYQRIQAEKSQQSSY	MLILTRRVGETLMVGDDVTVTVLGVKGNQVRIGVNAPKEVAVHREEIYQRIQKEKDQEPNH	100	gnl|BL_ORD_ID|2788|hsp_num:0	3807			0	183	trimethoprim; chloramphenicol
	1_1052 # 1102247 # 1103785 # -1 # ID=1_1052;partial=00;start_type=ATG;rbs_motif=GAGG;rbs_spacer=8bp;gc_cont=0.571	1_1052	1102247	1103785	-	Strict	900	966.5	emrB	95.9	3000074	protein homolog model	n/a	n/a	fluoroquinolone antibiotic	antibiotic efflux	major facilitator superfamily (MFS) antibiotic efflux pump	ATGCAACAGCAAAAACCGCTGGAGGGCGCGCAGCTCGTCATCATGACGATCGCGCTGTCGCTGGCGACATTCATGCAGGTGCTGGACTCCACCATTGCCAACGTGGCGATTCCGACCATCGCCGGGAACCTGGGTTCTTCCCTAAGCCAGGGGACATGGGTTATCACCTCTTTCGGGGTGGCGAACGCTATCTCGATTCCCTTAACCGGCTGGCTGGCGAAACGTTTTGGCGAAGTCAAACTGTTCATGTGGTCGACGGTCGCCTTTGCCGCGGCCTCCTGGGCCTGTGGCGTATCCAGCAGCCTGAATATGCTTATCTTCTTCCGCGTGGTGCAGGGCGTGGTCGCCGGGCCGCTGATTCCGCTCTCGCAAAGCCTGTTGCTGAATAACTATCCGCCT…	MQQQKPLEGAQLVIMTIALSLATFMQVLDSTIANVAIPTIAGNLGSSLSQGTWVITSFGVANAISIPLTGWLAKRFGEVKLFMWSTVAFAAASWACGVSSSLNMLIFFRVVQGVVAGPLIPLSQSLLLNNYPPAKRSIALALWSMTVIVAPICGPILGGYISDNYHWGWIFFINVPIGIAVVLMTLHTLRGRETHTERRRIDAVGLALLVIGIGSLQIMLDRGKELDWFSSQEIIILTVVAVIAISFLIVWELTDDHPIVDLSLFKSRNFTIGCLCISLAYMLYFGAIVLLPQLLQEVYGYTATWAGLASAPVGIIPVILSPIIGRFAHKLDMRRLVTFSFIMYAVCFYWRAWTFEPGMDFGASAWPQFIQGFAVACFFMPLTTITLSGLPPERLAAAS…	MQQQKPLEGAQLVIMTIALSLATFMQVLDSTIANVAIPTIAGNLGSSLSQGTWVITSFGVANAISIPLTGWLAKRVGEVKLFLWSTIAFAIASWACGVSSSLNMLIFFRVIQGIVAGPLIPLSQSLLLNNYPPAKRSIALALWSMTVIVAPICGPILGGYISDNYHWGWIFFINVPIGVAVVLMTLQTLRGRETRTERRRIDAVGLALLVIGIGSLQIMLDRGKELDWFSSQEIIILTVVAVVAICFLIVWELTDDNPIVDLSLFKSRNFTIGCLCISLAYMLYFGAIVLLPQLLQEVYGYTATWAGLASAPVGIIPVILSPIIGRFAHKLDMRRLVTFSFIMYAVCFYWRAYTFEPGMDFGASAWPQFIQGFAVACFFMPLTTITLSGLPPERLAAAS…	100	gnl|BL_ORD_ID|1705|hsp_num:0	1847			0	1536	nalidixic acid
	1_1054 # 1105101 # 1105631 # -1 # ID=1_1054;partial=00;start_type=ATG;rbs_motif=GAGG;rbs_spacer=10bp;gc_cont=0.482	1_1054	1105101	1105631	-	Strict	280	327	emrR	93.14	3000516	protein homolog model	n/a	n/a	fluoroquinolone antibiotic	antibiotic efflux	major facilitator superfamily (MFS) antibiotic efflux pump	ATGGATAGTTCGTTTACGCCCATTGAACAAATGCTAAAATTTCGCGCCAGCCGTCACGAAGACTTTCCTTATCAGGAAATTCTTTTGACTCGTCTTTGTATGCACATGCAAGGCAAGCTCCTGGAAAACCGCAATAAAATGCTGAAGGCTCAAGGGATTAACGAGACGTTGTTTATGGCGTTGATTACGCTGGAGTCTCAGGAAAACCACAGTATTCAGCCGTCTGAATTAAGCTGCGCGCTGGGTTCATCTCGCACCAATGCGACACGCATTGCAGATGAGCTGGAAAAACGCGGCTGGATTGAGCGTCGTGAGAGCGATAACGACCGCCGTTGCCTGCATCTGCAATTAACGGAGAAAGGCCAGGCATTTTTGCAAGAAGTGCTTCCGCCTCAGCAT…	MDSSFTPIEQMLKFRASRHEDFPYQEILLTRLCMHMQGKLLENRNKMLKAQGINETLFMALITLESQENHSIQPSELSCALGSSRTNATRIADELEKRGWIERRESDNDRRCLHLQLTEKGQAFLQEVLPPQHHCLHQLWSSLSTAEKDQLEHITRKLLTRLDQMEQEGTVLEALR	MDSSFTPIEQMLKFRASRHEDFPYQEILLTRLCMHMQSKLLENRNKMLKAQGINETLFMALITLESQENHSIQPSELSCALGSSRTNATRIADELEKRGWIERRESDNDRRCLHLQLTEKGHEFLREVLPPQHNCLHQLWSALSTTEKDQLEQITRKLLSRLDQMEQDGVVLEAMS	100	gnl|BL_ORD_ID|1225|hsp_num:0	1330			0	525	nalidixic acid
	1_1435 # 1546825 # 1548471 # -1 # ID=1_1435;partial=00;start_type=ATG;rbs_motif=GAG;rbs_spacer=6bp;gc_cont=0.541	1_1435	1546825	1548471	-	Strict	400	718.8	ArnT	62.61	3005053	protein homolog model	n/a	n/a	peptide antibiotic	antibiotic target alteration	pmr phosphoethanolamine transferase	ATGATGAAATCGATACGCTATTATCTGGCTTTCGCCGCATTTATCGCGCTCTACTATGTTATTCCTGTCAATAGCCGCCTGCTCTGGCAGCCGGATGAAACGCGCTATGCCGAAATAAGTCGGGAGATGCTGGCGTCTGGCGACTGGATCGTGCCGCATTTTCTGGGATTACGTTATTTTGAAAAACCGATAGCCGGTTACTGGATAAACAGTCTGGGTCAGTGGCTTTTTGGCGCTACCAATTTTGGCGTGCGGGCTGGCGCTATTTTAACGACATTGCTGGCCGCAGCGCTGGTGGCGTGGCTGACGTTCCGCTTATGGCGGGATAAACGTACCGCGTTGCTCGCCTCCGTTATCTTTCTCTCCCTCTTTGCCGTTTACAGTATCGGGACGTATGCG…	MMKSIRYYLAFAAFIALYYVIPVNSRLLWQPDETRYAEISREMLASGDWIVPHFLGLRYFEKPIAGYWINSLGQWLFGATNFGVRAGAILTTLLAAALVAWLTFRLWRDKRTALLASVIFLSLFAVYSIGTYAVLDPMIALWLTAGMCCFWQGMQATTRTGKIGMFLLLGATCGLGVLTKGFLALAVPVVSVLPWVIVQKRWKDFLLYGWLAVLSCFVVVLPWAIAIARREADFWHYFFWVEHIQRFAMSDAQHKAPFWYYLPVLLAGSLPWLGLLPGALKLGWRERNGAFYLLGWTIMPLLFFSIAKGKLPTYVLSCFAPIAILMARFVLHNVKEGVAALRVNGGINLVFGIIGIVAAFVVSSWGPLKSPVWTHIETYKVFCVWGVFTVWAFVGWYSL…	MKSIRYGVSLIALFALYYLLPLNFRLLWQPDETRYAEISREMLATGDWVVPHFLGLRYFEKPIAGYWINSIGQWLFGHNNFGVRFGSVFAITMTALLVAWLAWRIFRDKRVAILSLIIFLTAMLVYAIGTYAVLDPMITLWLALAMCSFWGAVQAHSRSGKILGYVLLGVACGMGVMTKGFLALAVPVVGVLPWVIARKRWREVLTYGWLAVIVCTLVVLPWGLAIAQREPDFWRYFFWVEHIQRFAEKDAQHKAPFWYYIPFLIAGSLPWLALLPGALKRGWLERDEARGALYLLGWVAMPFLFFSIAKGKLPTYILPCFAPLSILMARYALEAAKTGAKALRINGMINLGVGLLGLIAVLVVSPWGFMHKPVWTKIELYKCLLAAIAFAVWALMGWL…	99.46	gnl|BL_ORD_ID|2779|hsp_num:0	3795			0	1653	colistin A; colistin B
	1_1438 # 1551343 # 1552326 # -1 # ID=1_1438;partial=00;start_type=ATG;rbs_motif=AGGA;rbs_spacer=8bp;gc_cont=0.538	1_1438	1551343	1552326	-	Strict	550	554.7	PmrF	87.42	3003578	protein homolog model	n/a	n/a	peptide antibiotic	antibiotic target alteration	pmr phosphoethanolamine transferase	ATGTTTGACGCCGCCCCCATAAAAAAAGTCTCGGTGGTTATTCCTGTCTATAACGAACAGGAAAGCCTGCCGGAATTGATAAGACGCACCACCGCCGCCTGCGAGAGTCTGGGCAAAGCGTGGGAGATTTTATTGATAGATGATGGTAGCAGCGATAGCTCGGCGGAGCTGATGGTTAAGGCGTCCCAGGAAGCCGATAGCCATATCATCTCTATTTTACTCAACCGTAACTACGGTCAACATGCAGCGATCATGGCGGGGTTTAGCCATGTAAGCGGCGATCTCATCATTACGCTGGATGCCGATCTGCAAAACCCGCCGGAAGAGATCCCGCGCCTGGTGGCGAAAGCCGATGAAGGGTTCGATGTGGTAGGCACCGTGCGCCAGAACCGACAGGAC…	MFDAAPIKKVSVVIPVYNEQESLPELIRRTTAACESLGKAWEILLIDDGSSDSSAELMVKASQEADSHIISILLNRNYGQHAAIMAGFSHVSGDLIITLDADLQNPPEEIPRLVAKADEGFDVVGTVRQNRQDSLFRKSASKIINLLIQRTTGKAMGDYGCMLRAYRRPIIDTMLRCHERSTFIPILANIFARRATEIPVHHAEREFGDSKYSFMRLINLMYDLVTCLTTTPLRLLSLLGSVIAIGGFSLSVLLIVLRLALGPQWAAEGVFMLFAVLFTFIGAQFIGMGLLGEYIGRIYNDVRARPRYFVQQVIYPESTPFTEESHQ	MFEIHPVKKVSVVIPVYNEQESLPELIRRTTTACESLGKEYEILLIDDGSSDNSAHMLVEASQAENSHIVSILLNRNYGQHSAIMAGFSHVTGDLIITLDADLQNPPEEIPRLVAKADEGYDVVGTVRQNRQDSWFRKTASKMINRLIQRTTGKAMGDYGCMLRAYRRHIVDAMLHCHERSTFIPILANIFARRAIEIPVHHAEREFGESKYSFMRLINLMYDLVTCLTTTPLRMLSLLGSIIAIGGFSIAVLLVILRLTFGPQWAAEGVFMLFAVLFTFIGAQFIGMGLLGEYIGRIYTDVRARPRYFVQQVIRPSSKENE	101.55	gnl|BL_ORD_ID|1936|hsp_num:0	2014			0	954	polymyxin B
	1_1711 # 1852269 # 1853693 # 1 # ID=1_1711;partial=00;start_type=TTG;rbs_motif=AGG;rbs_spacer=6bp;gc_cont=0.538	1_1711	1852269	1853693	+	Strict	900	909.1	MdtK	99.16	3001327	protein homolog model	n/a	n/a	fluoroquinolone antibiotic	antibiotic efflux	multidrug and toxic compound extrusion (MATE) transporter	TTGAACGTCTCCACTGCCTTACGCCAGGCTGTCGTCCGTACGCCCTGGTATGCCAAACGCAAGAGCTACAAAGTGTTGTTCTGGCGTGAAATCACCCCACTTGCTATCCCTATTTTTCTGGAAAATACCTGTGTTTTGCTAATGGGCGTGCTCAGTACTTTTCTCGTCAGTTGGCTGGGCAAGGAAGCAATGGCGGGCGTGGGGCTTGCCGACAGTTTTAATATGGTAATTATGGCTTTTTTTGCGGCTATCGATCTTGGTACTACGGTGGTGGTTGCCTTTAGCCTGGGCAAGCGCGACAGGCGACGGGCAAGGGCGGCGGCGCGCCAGTCGCTGGTGATTATGACGCTATTTGCCGTTGTGCTGGCAGTGGTCATTCATTATTTCGGCAGTGAAATT…	MNVSTALRQAVVRTPWYAKRKSYKVLFWREITPLAIPIFLENTCVLLMGVLSTFLVSWLGKEAMAGVGLADSFNMVIMAFFAAIDLGTTVVVAFSLGKRDRRRARAAARQSLVIMTLFAVVLAVVIHYFGSEIINIVAGEATSEVKGLALTYLELTVLSYPAAAIALIGSGALRGAGNTKIPLMINGGMNILNIIISSILIYGAFSWQGLGFAGAGLGLTISRYIGAVAIIWVLMIGFNPALRIPLKSYLKPLNFGIIWEVMGIGIPASIESVLFNGGKLLTQMFVAGMGTNVIAGNFIAFSVAALINLPGNALGSASTIITGKRLGTGQIGQAERQLRHVFWMSTIVLTAIAWGTAPFAGLFASFYTQEQDVKEVVKVLLWLNAVFMPIWAAAWVLPS…	MNVSTALRQAVVRTPWYAKRKSYKVLFWREITPLAIPIFLENTCVLLMGVLSTFLVSWLGKEAMAGVGLADSFNMVIMAFFAAIDLGTTVVVAFSLGKRDRRRARAAARQSLVIMTLFAVVLAVVIHYFGSEIINIVAGEATPEVKGLALTYLELTVLSYPAAAIALIGSGALRGAGNTKIPLMINGGMNILNIIISSILIYGAFSWQGLGFAGAGLGLTISRYIGAVAIIWVLMIGFNPALRIPLKSYLKPLNFGIIWEVMGIGIPASIESVLFNGSKLLTQMFVAGMGTNVIAGNFIAFSVAALINLPGNALGSASTIITGKRLGTGQIGQAERQLRHVFWMSTIVLTAIAWGTAPFAGLFASFYTQEQDVKEVVKVLLWLNAAFMPIWAAAWVLPS…	100	gnl|BL_ORD_ID|1649|hsp_num:0	1752			0	1422	ciprofloxacin
	1_2154 # 2282425 # 2282787 # 1 # ID=1_2154;partial=00;start_type=ATG;rbs_motif=AGGAG;rbs_spacer=7bp;gc_cont=0.446	1_2154	2282425	2282787	+	Strict	150	169.1	Klebsiella pneumoniae KpnE	76.67	3004580	protein homolog model	n/a	n/a	macrolide antibiotic; aminoglycoside antibiotic; cephalosporin; tetracycline antibiotic; peptide antibiotic; rifamycin antibiotic; disinfecting agents and antiseptics	antibiotic efflux	small multidrug resistance (SMR) antibiotic efflux pump	ATGTTTTACTGGATTTTATTAGCTCTGGCTATCGCGACTGAAATTACCGGCACGCTCTCAATGAAATGGGCTAGCGTGGGTAATGGCAATGCGGGTTTTATTTTAATGCTGGTGATGATCACGCTGTCATATATATTTCTTTCTTTTGCGGTAAAAAAGATTGCCCTGGGTGTAGCGTATGCCTTATGGGAAGGGATCGGCATTTTATTTATTACCATTTTTAGCGTGCTGCTATTTGATGAAGCATTATCAACCATGAAGATTGCCGGCTTGCTGACGCTGGTCGCCGGCATAGTATTGATCAAATCAGGGACGCGTAAACCCGGCAAACCGGTGAAGGAGGCGACTCGTGCAACAATTTGA	MFYWILLALAIATEITGTLSMKWASVGNGNAGFILMLVMITLSYIFLSFAVKKIALGVAYALWEGIGILFITIFSVLLFDEALSTMKIAGLLTLVAGIVLIKSGTRKPGKPVKEATRATI	MFYWILLALAIIAEITGTLSMKWASVSGGHTGFILMLAMIALSYIFLAFAVKKIALGVAYALWEGIGILLITLFSVLLFDESLSLLKIAGLTTLVIGIVLIKSGTQKKASSQQEVAHAAV	100	gnl|BL_ORD_ID|2715|hsp_num:0	3283			0	360	erythromycin; streptomycin; tetracycline; cefepime; ceftriaxone; rifampin; colistin A; colistin B; triclosan; benzalkonium chloride; chlorhexidine
	1_2155 # 2282774 # 2283103 # 1 # ID=1_2155;partial=00;start_type=GTG;rbs_motif=AGGAG;rbs_spacer=7bp;gc_cont=0.558	1_2155	2282774	2283103	+	Strict	150	189.1	Klebsiella pneumoniae KpnF	87.16	3004583	protein homolog model	n/a	n/a	macrolide antibiotic; aminoglycoside antibiotic; cephalosporin; tetracycline antibiotic; peptide antibiotic; rifamycin antibiotic; disinfecting agents and antiseptics	antibiotic efflux	small multidrug resistance (SMR) antibiotic efflux pump	GTGCAACAATTTGAATGGATACACGGCGCCTGGCTTGGGCTGGCAATAATGCTGGAAATCGCGGCTAACGTACTGTTGAAATTTTCGGACGGCTTTCGCCGTAAATGCTATGGCATCTTATCGCTTGCCGCTGTTCTGGCCGCCTTCAGCGCGCTTTCCCAGGCGGTAAAAGGGATAGACCTGTCGGTGGCGTATGCGTTATGGGGCGGTTTTGGTATTGCCGCCACGCTGGCGGCGGGCTGGGTGCTCTTCGGCCAGCGCTTAAACCCCAAAGGCTGGGTTGGCGTGATATTGCTGCTCGCCGGAATGGTCATGATCAAATTTGCCTGA	MQQFEWIHGAWLGLAIMLEIAANVLLKFSDGFRRKCYGILSLAAVLAAFSALSQAVKGIDLSVAYALWGGFGIAATLAAGWVLFGQRLNPKGWVGVILLLAGMVMIKFA	MQQFEWIHAAWLAIAIVLEIIANVFLKFSDGFRRKIYGILSLAAVLGAFSALSQAVKGIDLSVAYALWGGFGIAATIAAGWVLFGQRLNNKGWAGVILLVAGMVLIKLA	100	gnl|BL_ORD_ID|2717|hsp_num:0	3286			0	327	erythromycin; streptomycin; tetracycline; cefepime; ceftriaxone; rifampin; colistin A; colistin B; triclosan; benzalkonium chloride; chlorhexidine
	1_2192 # 2319284 # 2319667 # -1 # ID=1_2192;partial=00;start_type=ATG;rbs_motif=GAGG;rbs_spacer=7bp;gc_cont=0.471	1_2192	2319284	2319667	-	Strict	230	247.3	marA	95.24	3000263	protein homolog model	n/a	n/a	fluoroquinolone antibiotic; monobactam; carbapenem; cephalosporin; glycylcycline; cephamycin; penam; tetracycline antibiotic; rifamycin antibiotic; phenicol antibiotic; penem; disinfecting agents and antiseptics	antibiotic efflux; reduced permeability to antibiotic	resistance-nodulation-cell division (RND) antibiotic efflux pump; General Bacterial Porin with reduced permeability to beta-lactams	ATGTCCAGACGCAACACTGACGCTATTACTATTCATAGCATTTTGGACTGGATCGAGGATAACCTGGAGTCGCCGCTCTCACTGGAAAAAGTGTCTGAGCGTTCAGGATATTCCAAATGGCACCTGCAACGGATGTTTAAAAAAGAGACCGGTCATTCATTAGGCCAATACATCCGCAGCCGTAAAATGACGGAAATCGCGCAAAAATTAAAAGAGAGCAACGAGCCCATTCTCTATCTGGCGGAACGCTATGGCTTTGAGTCACAGCAAACATTGACCCGGACGTTCAAAAACTACTTTGATGTGCCGCCACACAAATACCGGATCACCAATATGCATGGCGAATCACGGTATATGCTGCCGCTGAACCATGGCAACTACTAG	MSRRNTDAITIHSILDWIEDNLESPLSLEKVSERSGYSKWHLQRMFKKETGHSLGQYIRSRKMTEIAQKLKESNEPILYLAERYGFESQQTLTRTFKNYFDVPPHKYRITNMHGESRYMLPLNHGNY	MSRRNTDAITIHSILDWIEDNLESPLSLEKVSERSGYSKWHLQRMFKKETGHSLGQYIRSRKMTEIAQKLKESNEPILYLAERYGFESQQTLTRTFKNYFDVPPHKYRMTNMQGESRFLHPLNHYNS	100	gnl|BL_ORD_ID|1771|hsp_num:0	1922			0	378	tigecycline; tetracycline; rifampin; chloramphenicol; ampicillin; cefalotin; triclosan
	1_2287 # 2425023 # 2425460 # 1 # ID=1_2287;partial=00;start_type=ATG;rbs_motif=AGGAG;rbs_spacer=7bp;gc_cont=0.523	1_2287	2425023	2425460	+	Strict	275	298.1	AAC(6')-Iy	97.24	3002569	protein homolog model	n/a	n/a	aminoglycoside antibiotic	antibiotic inactivation	AAC(6')	ATGGACATCAGGCAAATGAACAAAACCCATCTGGAGCACTGGCGCGGATTGCGAAAACAGCTCTGGCCCGGTCACCCGGATGACGCCCATCTGGCAGACGGCGAAGAAATCCTGCAAGCCGATCATTTGGCATCATTTGTTGCGATGGCAGACGGGGTGGCGATTGGCTTTGCGGATGCCTCAATCCGCCACGATTATGTCAATGGCTGTGACAGTTCGCCCGTGGCTTTTCTTGAAGGTATTTTTGTTCTCCCCTCGTTCCGTCAACGCGGCGTAGCGAAACAATTGATTGCAGCGGTGCAACGATGGGGAACGAATAAAGGGTGTCGGGAAATGGCCTCTGATACCACGCCGGAAAATACAATTTCCCAGAAAGTTCACCTGGCATTAGGATTTGAG…	MDIRQMNKTHLEHWRGLRKQLWPGHPDDAHLADGEEILQADHLASFVAMADGVAIGFADASIRHDYVNGCDSSPVAFLEGIFVLPSFRQRGVAKQLIAAVQRWGTNKGCREMASDTTPENTISQKVHLALGFEETERVIFYRKRC	MDIRQMNKTHLEHWRGLRKQLWPGHPDDAHLADGEEILQADHLASFIAMADGVAIGFADASIRHDYVNGCDSSPVVFLEGIFVLPSFRQRGVAKQLIAAVQRWGTNKGCREMASDTSPENTISQKVHQALGFEETERVIFYRKRC	100	gnl|BL_ORD_ID|330|hsp_num:0	360			0	435	dibekacin; amikacin; sisomicin; netilmicin; tobramycin; 2'-N-ethylnetilmicin; 5-episisomicin
	1_2445 # 2582082 # 2582495 # 1 # ID=1_2445;partial=00;start_type=ATG;rbs_motif=GAG;rbs_spacer=9bp;gc_cont=0.454	1_2445	2582082	2582495	+	Strict	240	245.7	H-NS	94.89	3000676	protein homolog model	n/a	n/a	macrolide antibiotic; fluoroquinolone antibiotic; cephalosporin; cephamycin; penam; tetracycline antibiotic	antibiotic efflux	major facilitator superfamily (MFS) antibiotic efflux pump; resistance-nodulation-cell division (RND) antibiotic efflux pump	ATGAGCGAAGCACTTAAAATTCTGAACAACATCCGTACTCTTCGTGCGCAGGCAAGAGAATGTACTCTGGAAACGCTTGAAGAAATGCTGGAAAAATTAGAAGTTGTCGTTAATGAGCGTCGTGAAGAAGAAAGCGCTGCTGCTGCTGAAGTGGAAGAACGCACTCGTAAACTGCAACAGTATCGTGAAATGTTAATTGCCGACGGCATTGACCCGAATGAACTGCTGAATAGCATGGCTGCCGCTAAATCCGGTACCAAAGCTAAACGCGCAGCTCGTCCGGCTAAATATAGCTATGTTGACGAAAACGGTGAAACTAAAACCTGGACTGGCCAGGGTCGTACACCGGCTGTAATCAAAAAAGCAATGGAAGAACAAGGTAAGCAACTGGAAGATTTC…	MSEALKILNNIRTLRAQARECTLETLEEMLEKLEVVVNERREEESAAAAEVEERTRKLQQYREMLIADGIDPNELLNSMAAAKSGTKAKRAARPAKYSYVDENGETKTWTGQGRTPAVIKKAMEEQGKQLEDFLIKE	MSEALKILNNIRTLRAQARECTLETLEEMLEKLEVVVNERREEESAAAAEVEERTRKLQQYREMLIADGIDPNELLNSLAAVKSGTKAKRAQRPAKYSYVDENGETKTWTGQGRTPAVIKKAMDEQGKSLDDFLIKQ	100	gnl|BL_ORD_ID|1144|hsp_num:0	1248			0	411	erythromycin; cloxacillin; ciprofloxacin; tetracycline; oxacillin; norfloxacin
	1_2664 # 2796075 # 2796797 # -1 # ID=1_2664;partial=00;start_type=ATG;rbs_motif=None;rbs_spacer=None;gc_cont=0.492	1_2664	2796075	2796797	-	Strict	470	488.4	sdiA	99.58	3000826	protein homolog model	n/a	n/a	fluoroquinolone antibiotic; cephalosporin; glycylcycline; penam; tetracycline antibiotic; rifamycin antibiotic; phenicol antibiotic; disinfecting agents and antiseptics	antibiotic efflux	resistance-nodulation-cell division (RND) antibiotic efflux pump	ATGCAGGAAAATGATTTCTTCACCTGGCGACGCGCAATGTTGTTACGCTTTCAGGAGATGGCGGCAGCAGAGGATGTTTATACTGAATTGCAATATCAGACACAGCGGCTGGAATTTGATTATTATGCCCTGTGTGTTCGTCATCCCGTCCCCTTTACCCGGCCTAAAATATCGCTTCGTACCACTTATCCTCCGGCGTGGGTAACGCATTACCAGTCCGAAAACTATTTTGCGATCGATCCGGTATTAAAGCCGGAAAATTTCAGGCAGGGTCATTTACATTGGGATGACGTGCTATTTCATGAAGCGCAGGCGATGTGGGATGCCGCCCAGCGTTTCGGATTACGCAGAGGCGTAACCCAGTGTGTGATGTTGCCGAACCGGGCGCTGGGCTTTTTA…	MQENDFFTWRRAMLLRFQEMAAAEDVYTELQYQTQRLEFDYYALCVRHPVPFTRPKISLRTTYPPAWVTHYQSENYFAIDPVLKPENFRQGHLHWDDVLFHEAQAMWDAAQRFGLRRGVTQCVMLPNRALGFLSFSRSSLRCSSFTYDEVELRLQLLARESLSALTRFEDDMVMAPEMRFSKREKEILKWTAEGKTSSEIAIILSISENTVNFHQKNMQKKFNAPNKTQIACYAAATGLI	MQENDFFTWRRAMLLRFQEMAAAEDVYTELQYQTQRLEFDYYALCVRHPVPFTRPKISLRTTYPPAWVTHYQSENYFAIDPVLKPENFRQGHLHWDDVLFHEAKAMWDAAQRFGLRRGVTQCVMLPNRALGFLSFSRSSLRCSSFTYDEVELRLQLLARESLSALTRFEDDMVMAPEMRFSKREKEILKWTAEGKTSSEIAIILSISENTVNFHQKNMQKKFNAPNKTQIACYAAATGLI	100	gnl|BL_ORD_ID|208|hsp_num:0	228			0	720	tigecycline; tetracycline; rifampin; chloramphenicol; ampicillin; cefalotin; triclosan
	1_2834 # 2964144 # 2965892 # -1 # ID=1_2834;partial=00;start_type=ATG;rbs_motif=None;rbs_spacer=None;gc_cont=0.516	1_2834	2964144	2965892	-	Strict	1000	1067.4	msbA	96.39	3003950	protein homolog model	n/a	n/a	nitroimidazole antibiotic	antibiotic efflux	ATP-binding cassette (ABC) antibiotic efflux pump	ATGCATAACGATAAAGATCTCTCTACGTGGCAGACCTTCCGCCGACTGTGGCCAACCATAGCGCCTTTTAAAGCAGGTCTGATCGTGGCGGGCATAGCGTTAATTCTCAACGCAGCCAGCGATACCTTCATGCTATCGCTCCTCAAGCCATTACTGGATGATGGTTTCGGTAAAACGGATCGCTCAGTGTTGCTGTGGATGCCGCTGGTGGTTATTGGGCTGATGATATTACGAGGCATCACTAGCTATATCTCCAGCTACTGTATTTCATGGGTGTCAGGCAAGGTGGTAATGACCATGCGCCGTCGCCTGTTTGGCCATATGATGGGAATGCCCGTCGCCTTCTTTGATAAACAGTCTACCGGTACGCTGCTGTCGCGTATTACTTACGATTCAGAA…	MHNDKDLSTWQTFRRLWPTIAPFKAGLIVAGIALILNAASDTFMLSLLKPLLDDGFGKTDRSVLLWMPLVVIGLMILRGITSYISSYCISWVSGKVVMTMRRRLFGHMMGMPVAFFDKQSTGTLLSRITYDSEQVASSSSGALITVVREGASIIGLFIMMFYYSWQLSIILVVLAPIVSIAIRVVSKRFRSISKNMQNTMGQVTTSAEQMLKGHKEVLIFGGQEVETKRFDKVSNKMRLQGMKMVSASSISDPIIQLIASLALAFVLYAASFPSVMDSLTAGTITVVFSSMIALMRPLKSLTNVNAQFQRGMAACQTLFAILDSEQEKDEGKRVIDRATGDLEFRNVTFTYPGREVPALRNINLKIPAGKTVALVGRSGSGKSTIASLITRFYDIDEGH…	MHNDKDLSTWQTFRRLWPTIAPFKAGLIVAGVALILNAASDTFMLSLLKPLLDDGFGKTDRSVLVWMPLVVIGLMILRGITSYVSSYCISWVSGKVVMTMRRRLFGHMMGMPVSFFDKQSTGTLLSRITYDSEQVASSSSGALITVVREGASIIGLFIMMFYYSWQLSIILIVLAPIVSIAIRVVSKRFRNISKNMQNTMGQVTTSAEQMLKGHKEVLIFGGQEVETKRFDKVSNRMRLQGMKMVSASSISDPIIQLIASLALAFVLYAASFPSVMDSLTAGTITVVFSSMIALMRPLKSLTNVNAQFQRGMAACQTLFTILDSEQEKDEGKRVIERATGDVEFRNVTFTYPGRDVPALRNINLKIPAGKTVALVGRSGSGKSTIASLITRFYDIDEGE…	100	gnl|BL_ORD_ID|2183|hsp_num:0	2423			0	1746	metronidazole
	1_2909 # 3052863 # 3054095 # -1 # ID=1_2909;partial=00;start_type=ATG;rbs_motif=GAG;rbs_spacer=5bp;gc_cont=0.554	1_2909	3052863	3054095	-	Strict	700	700.7	Escherichia coli mdfA	87.71	3001328	protein homolog model	n/a	n/a	tetracycline antibiotic; disinfecting agents and antiseptics	antibiotic efflux	major facilitator superfamily (MFS) antibiotic efflux pump	ATGCAGAATCGTTTACAATCAGGCGGCAGGCTGGGACGTCAGGCGCTGCTTTTTCCTCTCTGTCTGGTGCTGTACGAATTTTCTACTTATATTGGCAACGACATGATCCAGCCGGGTATGCTGGCGGTGGTTGAGCAGTATCAGGCGTGCCTGGACTGGGTTCCGACGTCCATGACCGCTTATCTGGCGGGCGGTATGTTCTTACAGTGGCTGCTTGGCCCGTTGTCTGACCGGATTGGCCGTCGTCCCGTGATGCTGGCGGGCGTCGTGTGGTTTATTGTCACCTGCCTGGCGACGTTACTGGCGAAAAACATCGAACAATTTACCTTCCTGCGTTTTTTGCAAGGGATTAGCCTGTGTTTTATCGGCGCTGTAGGGTATGCCGCGATTCAGGAGTCC…	MQNRLQSGGRLGRQALLFPLCLVLYEFSTYIGNDMIQPGMLAVVEQYQACLDWVPTSMTAYLAGGMFLQWLLGPLSDRIGRRPVMLAGVVWFIVTCLATLLAKNIEQFTFLRFLQGISLCFIGAVGYAAIQESFEEAVCIKITALMANVALIAPLLGPLVGAAWVHVLPWEGMFILFAALAAIAFFGLQRAMPETATRRGETLSFKALGRDYRLVIKNRRFVAGALALGFVSLPLLAWIAQSPIIIISGEQLSSYEYGLLQVPVFGALIAGNLVLARLTSRRTVRSLIVMGGWPIVAGLIIAAAATVVSSHAYLWMTAGLSVYAFGIGLANAGLVRLTLFSSDMSKGTVSAAMGMLQMLIFTVGIEVSKHAWLSGGNGLFSLFNLANGILWLLLMLVFL…	MQNKLASGARLGRQALLFPLCLVLYEFSTYIGNDMRQPGMLENVEQYQAGIEWVPTSMNAYLAGGMFIQWLLGPLSDRIGRRPVMLAGVVWFIVTCLAILLAQNIEQFTLLRFLHGISLCFIGAVGYDAIQESFEEAVCIKITALMANVALIAPLLGPLVGASWIHVLPWEGMFVLFAALAAISFFGLQRAMPETATRIGEKLSLKELGRDYKLVLKNGRFVAGALALGFLSLPLLAWIAQSPIIIITGEQLSSYEYGLLQVPIFGALIAGNLLLARLTSRRTVRSLIIMGGWPIMIGLLVAAAATVISSHAYLWMTAGLSIYAFGIGLANAGLVRLTLFASVMSKGTVSAAMGMLQMLIFTVGIEISKHAWLNGGNGLFNLFNLVNGILLLSLMVIFL…	100	gnl|BL_ORD_ID|2417|hsp_num:0	37			0	1221	tetracycline; benzalkonium chloride
	1_3059 # 3212395 # 3213072 # 1 # ID=1_3059;partial=00;start_type=GTG;rbs_motif=GAGGA;rbs_spacer=3bp;gc_cont=0.563	1_3059	3212395	3213072	+	Strict	400	422.9	kdpE	91.96	3003841	protein homolog model	n/a	n/a	aminoglycoside antibiotic	antibiotic efflux	kdpDE	GTGACAAACGTTCTGATTGTTGAAGATGAACAGGCCATCCGCCGCTTTCTGCGCGCCGCGCTGGAAGGCGACGGCCTGCGCGTGTATGAAGCTGAAACATTACAACGTGGTTTACTGGAAGCCGCCACGCGAAAGCCCGATCTGATTATTCTCGATCTCGGCCTGCCGGACGGCGACGGAATCGATTTCATTCGCGACCTGCGTCAGTGGAGCGCAATACCGGTGATTGTCCTTTCCGCCCGCAGCGAAGAAAGCGATAAGATTGCCGCGCTTGACGCCGGAGCTGATGATTACCTGAGCAAGCCATTCGGCATTGGCGAGTTGCAGGCGCGTTTGCGTGTCGCGCTGCGACGGCACGCCGCCAGCCCTAGCGCCGATCCGATCGTCCGTTTTTCCGGC…	MTNVLIVEDEQAIRRFLRAALEGDGLRVYEAETLQRGLLEAATRKPDLIILDLGLPDGDGIDFIRDLRQWSAIPVIVLSARSEESDKIAALDAGADDYLSKPFGIGELQARLRVALRRHAASPSADPIVRFSGVTVDLAARLIHRGDEEIHLTPIEFRLLAVLLNNTGKVLTQRQLLNQVWGPNAVEHSHYLRIYMGHLRQKLEQDPTRPRHFITETGIGYRFMP	MTNVLIVEDEQAIRRFLRTALEGDGMRVFEAETLQRGLLEAATRKPDLIILDLGLPDGDGIEFIRDLRQWSAVPVIVLSARSEESDKIAALDAGADDYLSKPFGIGELQARLRVALRRHSATTAPDPLVKFSDVTVDLAARVIHRGEEEVHLTPIEFRLLAVLLNNAGKVLTQRQLLNQVWGPNAVEHSHYLRIYMGHLRQKLEQDPARPRHFITETGIGYRFML	100	gnl|BL_ORD_ID|2101|hsp_num:0	2331			0	672	kanamycin A
	1_3273 # 3438484 # 3439677 # 1 # ID=1_3273;partial=00;start_type=ATG;rbs_motif=GAGG;rbs_spacer=7bp;gc_cont=0.554	1_3273	3438484	3439677	+	Strict	670	691	Escherichia coli acrA	91.69	3004043	protein homolog model	n/a	n/a	fluoroquinolone antibiotic; cephalosporin; glycylcycline; penam; tetracycline antibiotic; rifamycin antibiotic; phenicol antibiotic; disinfecting agents and antiseptics	antibiotic efflux	resistance-nodulation-cell division (RND) antibiotic efflux pump	ATGAACAAAAACAGAGGGTTAACGCCTCTGGCGGTCGTTCTGATGCTCTCAGGCAGCTTAGCGCTAACAGGATGTGACGACAAACAGGACCAGCAAGGCGGCCAGCAGATGCCAGAAGTTGGAGTTGTCACACTAAAAACGGAACCACTGCAAATCACAACTGAACTTCCGGGTCGTACCGTTGCTTACCGTATCGCCGAAGTTCGCCCACAGGTAAGCGGCATTATCCTGAAGCGTAATTTCGTTGAGGGAAGTGATATCGAAGCGGGAGTCTCTCTCTATCAGATTGATCCTGCGACCTACCAGGCGACTTACGACAGCGCTAAGGGCGATCTGGCAAAAGCGCAGGCCGCCGCGAATATCGCTGAACTGACGGTGAAGCGTTATCAAAAGCTGCTG…	MNKNRGLTPLAVVLMLSGSLALTGCDDKQDQQGGQQMPEVGVVTLKTEPLQITTELPGRTVAYRIAEVRPQVSGIILKRNFVEGSDIEAGVSLYQIDPATYQATYDSAKGDLAKAQAAANIAELTVKRYQKLLGTQYISKQEYDQALADAQQATAAVVAAKAAVETARINLAYTKVTSPISGRIGKSSVTEGALVQNGQASALATVQQLDPIYVDVTQSSNDFLRLKQELANGSLKQENGKAKVDLVTSDGIKFPQSGTLEFSDVTVDQTTGSITLRAIFPNPDHTLLPGMFVRARLQEGTKPTALLVPQQGVTRTPRGDATVLVVGADNKVETRQIVASQAIGDKWLVTDGLKAGDRVVVSGLQKVRPGAQVKVQEITADNKQQAASGDQPAQPRS	MNKNRGFTPLAVVLMLSGSLALTGCDDKQAQQGGQQMPAVGVVTVKTEPLQITTELPGRTSAYRIAEVRPQVSGIILKRNFKEGSDIEAGVSLYQIDPATYQATYDSAKGDLAKAQAAANIAQLTVNRYQKLLGTQYISKQEYDQALADAQQANAAVTAAKAAVETARINLAYTKVTSPISGRIGKSNVTEGALVQNGQATALATVQQLDPIYVDVTQSSNDFLRLKQELANGTLKQENGKAKVSLITSDGIKFPQDGTLEFSDVTVDQTTGSITLRAIFPNPDHTLLPGMFVRARLEEGLNPNAILVPQQGVTRTPRGDATVLVVGADDKVETRPIVASQAIGDKWLVTEGLKAGDRVVISGLQKVRPGVQVKAQEVTADNNQQAASGAQPEQSKS	100	gnl|BL_ORD_ID|2319|hsp_num:0	2661			0	1191	tigecycline; tetracycline; rifampin; chloramphenicol; ampicillin; cefalotin; triclosan
	1_3274 # 3439700 # 3442849 # 1 # ID=1_3274;partial=00;start_type=ATG;rbs_motif=AGGAG;rbs_spacer=10bp;gc_cont=0.543	1_3274	3439700	3442849	+	Strict	1900	1902.5	acrB	94.66	3000216	protein homolog model	n/a	n/a	fluoroquinolone antibiotic; cephalosporin; glycylcycline; penam; tetracycline antibiotic; rifamycin antibiotic; phenicol antibiotic; disinfecting agents and antiseptics	antibiotic efflux	resistance-nodulation-cell division (RND) antibiotic efflux pump	ATGCCTAATTTCTTTATCGATCGCCCTATATTTGCGTGGGTGATCGCCATCATCATCATGTTGGCAGGGGGGCTCGCGATCCTCAAATTGCCGGTAGCGCAATATCCGACGATTGCGCCACCAGCAGTGACGATCTCCGCAACCTACCCTGGCGCTGATGCGAAAACGGTACAGGATACCGTCACGCAGGTTATCGAACAGAATATGAACGGTATCGATAACCTGATGTATATGTCCTCCAACAGTGACTCCACGGGGACCGTGCAGATCACGCTGACCTTTGAATCCGGCACCGATGCGGATATCGCGCAGGTTCAGGTTCAGAACAAGTTGCAACTGGCAATGCCTTTACTTCCCCAGGAAGTACAGCAACAGGGCGTGAGCGTTGAGAAGTCCTCA…	MPNFFIDRPIFAWVIAIIIMLAGGLAILKLPVAQYPTIAPPAVTISATYPGADAKTVQDTVTQVIEQNMNGIDNLMYMSSNSDSTGTVQITLTFESGTDADIAQVQVQNKLQLAMPLLPQEVQQQGVSVEKSSSSFLMVVGVINTDGTMTQEDISDYVAANMKDPISRTSGVGDVQLFGSQYAMRIWMNPTELTKYQLTPVDVINAIKAQNAQVAAGQLGGTPPVKGQQLNASIIAQTRLTSTDEFGKILLKVNQDGSQVRLRDVAKIELGGENYDVIAKFNGQPASGLGIKLATGANALDTATAIRAELKKMEPFFPPGMKIVYPYDTTPFVKISIHEVVKTLVEAIILVFLVMYLFLQNFRATLIPTIAVPVVLLGTFAVLAAFGFSINTLTMFGMV…	MPNFFIDRPIFAWVIAIIIMLAGGLAILKLPVAQYPTIAPPAVTISASYPGADAKTVQDTVTQVIEQNMNGIDNLMYMSSNSDSTGTVQITLTFESGTDADIAQVQVQNKLQLAMPLLPQEVQQQGVSVEKSSSSFLMVVGVINTDGTMTQEDISDYVAANMKDAISRTSGVGDVQLFGSQYAMRIWMNPNELNKFQLTPVDVITAIKAQNAQVAAGQLGGTPPVKGQQLNASIIAQTRLTSTEEFGKILLKVNQDGSRVLLRDVAKIELGGENYDIIAEFNGQPASGLGIKLATGANALDTAAAIRAELAKMEPFFPSGLKIVYPYDTTPFVKISIHEVVKTLVEAIILVFLVMYLFLQNFRATLIPTIAVPVVLLGTFAVLAAFGFSINTLTMFGMV…	100	gnl|BL_ORD_ID|1011|hsp_num:0	1104			0	3144	tigecycline; acriflavine; tetracycline; rifampin; chloramphenicol; ampicillin; cefalotin; triclosan
	1_3369 # 3537430 # 3538542 # 1 # ID=1_3369;partial=00;start_type=ATG;rbs_motif=None;rbs_spacer=None;gc_cont=0.517	1_3369	3537430	3538542	+	Strict	250	261.2	vanG	38.87	3002909	protein homolog model	n/a	n/a	glycopeptide antibiotic	antibiotic target alteration	glycopeptide resistance gene cluster; Van ligase	ATGGAATGGGTTTTTAAGATGGCGAAATTGCGGGTAGGAATAGTATTTGGCGGTAAGTCGGCGGAACATGAAGTGTCTTTGCAATCAGCGAAAAATATCGTTGATGCGATCGATAAAACCCGCTTCGACGTGGTGCTGTTAGGGATAGATAAGGCGGGACAATGGCATGTTAACGATGCGGAAAATTATTTGCAGAATGCAGACGATCCGGCACATATCGCGCTACGTCCTTCGGCAATCAGTCTGGCCCAGGTGCCTGGCAAACATCAACACCAATTGATTAACGCCCAGAACGGGCAGCCGCTACCGACGGTAGATGTTATTTTTCCTATCGTCCACGGTACGCTGGGCGAAGACGGCTCATTGCAGGGGATGCTGCGCGTCGCAAACTTACCGTTT…	MEWVFKMAKLRVGIVFGGKSAEHEVSLQSAKNIVDAIDKTRFDVVLLGIDKAGQWHVNDAENYLQNADDPAHIALRPSAISLAQVPGKHQHQLINAQNGQPLPTVDVIFPIVHGTLGEDGSLQGMLRVANLPFVGSDVLSSAACMDKDIAKRLLRDAGLNIAPFITLTRTNRHAFSFAEVESRLGLPLFVKPANQGSSVGVSKVANEAQYQQAVALAFEFDHKVVVEQGIKGREIECAVLGNDNPQASTCGEIVLNSEFYAYDTKYIDDNGAQVVVPAQLPSGVNDKIRAIAIQAYQTLGCAGMARVDVFLTADNEVVINEINTLPGFTNISMYPKLWQASGLGYTDLISRLIELALERHTANNALKTTM	MQNKKIAVIFGGNSTEYEVSLQSASAVFENINTNKFDIIPIGITRSGEWYHYTGEKEKILNNTWFEDSKNLCPVVVSQNRSVKGFLEIASDKYRIIKVDLVFPVLHGKNGEDGTLQGIFELAGIPVVGCDTLSSALCMDKDRAHKLVSLAGISVPKSVTFKRFNEEAAMKEIEANLTYPLFIKPVRAGSSFGITKVIEKQELDAAIELAFEHDTEVIVEETINGFEVGCAVLGIDELIVGRVDEIELSSGFFDYTEKYTLKSSKIYMPARIDAEAEKRIQEAAVTIYKALGCSGFSRVDMFYTPSGEIVFNEVNTIPGFTSHSRYPNMMKGIGLSFSQMLDKLIGLYVE	106.02	gnl|BL_ORD_ID|1069|hsp_num:0	1157			0	1047	vancomycin
	1_3395 # 3570838 # 3571302 # -1 # ID=1_3395;partial=00;start_type=ATG;rbs_motif=AGGAG;rbs_spacer=7bp;gc_cont=0.544	1_3395	3570838	3571302	-	Perfect	290	310.1	golS	100	3000504	protein homolog model	n/a	n/a	monobactam; carbapenem; cephalosporin; cephamycin; penam; phenicol antibiotic; penem	antibiotic efflux	resistance-nodulation-cell division (RND) antibiotic efflux pump	ATGAACATCGGTAAAGCAGCTAAAGCATCGAAAGTCTCGGCCAAAATGATTCGCTACTATGAACAGATTGGTCTGATTCCCGCGGCAAGTCGGACGGATTCCGGCTATCGGGCCTATACCCAGGCTGATGTTAATCAATTGCATTTTATACGCCGCGCGCGCGACCTCGGTTTTTCAGTTGCTGAAATCAGCGACTTACTGAATCTTTGGAATAACCAGTCGCGGCAAAGCGCTGACGTCAAACGCCTGGCGCAGACGCACATTGATGAACTGGACAGACGTATCCAGAACATGCAGCACATGGCGCAAACCCTCAAAGCGCTGATTCACTGCTGCGCCGGCGACGCGCTGCCAGATTGTCCCATTCTGCATACGCTTGGACAACCTGACGATAGCGAG…	MNIGKAAKASKVSAKMIRYYEQIGLIPAASRTDSGYRAYTQADVNQLHFIRRARDLGFSVAEISDLLNLWNNQSRQSADVKRLAQTHIDELDRRIQNMQHMAQTLKALIHCCAGDALPDCPILHTLGQPDDSEPEARTGAVLRRPRRHGLAKRL	MNIGKAAKASKVSAKMIRYYEQIGLIPAASRTDSGYRAYTQADVNQLHFIRRARDLGFSVAEISDLLNLWNNQSRQSADVKRLAQTHIDELDRRIQNMQHMAQTLKALIHCCAGDALPDCPILHTLGQPDDSEPEARTGAVLRRPRRHGLAKRL	100	gnl|BL_ORD_ID|36|hsp_num:0	44			0	462	chloramphenicol
	1_3398 # 3575102 # 3578269 # 1 # ID=1_3398;partial=00;start_type=ATG;rbs_motif=AGG;rbs_spacer=10bp;gc_cont=0.567	1_3398	3575102	3578269	+	Strict	750	1209.9	adeF	60.67	3000777	protein homolog model	n/a	n/a	fluoroquinolone antibiotic; tetracycline antibiotic	antibiotic efflux	resistance-nodulation-cell division (RND) antibiotic efflux pump	ATGAAATTCACCCACTTTTTCATTGCACGACCCATCTTCGCCATCGTCCTGTCGCTGTTAATGCTGCTGGCTGGCGCTATCGCCTTTTTAAAACTGCCGCTGAGTGAATATCCGGCCGTTACGCCGCCCACGGTACAGGTTAGCGCCAGCTACCCCGGCGCTAACCCGCAAGTGATTGCCGATACGGTAGCCGCGCCGCTGGAACAGGTGATCAACGGCGTTGACGGCATGTTGTATATGAATACCCAGATGGCCATTGATGGTCGCATGGTTATCTCTATCGCCTTCGAACAGGGAACCGATCCTGATATGGCGCAAATTCAGGTGCAAAACCGGGTATCCCGCGCGCTGCCTCGCCTGCCCGAAGAAGTCCAGCGAATTGGCGTTGTAACGGAGAAA…	MKFTHFFIARPIFAIVLSLLMLLAGAIAFLKLPLSEYPAVTPPTVQVSASYPGANPQVIADTVAAPLEQVINGVDGMLYMNTQMAIDGRMVISIAFEQGTDPDMAQIQVQNRVSRALPRLPEEVQRIGVVTEKTSPDMLMVVHLVSPQKRYDSLYLSNFAIRQVRDELARLPGVGDVLVWGAGEYAMRVWLDPAKIANRGLTASDIVTALREQNVQVAAGSVGQQPEASAAFQMTVNTLGRLTSEEQFGEIVVKIGADGEVTRLRDVARVTLGADAYTLRSLLNGEAAPALQIIQSPGANAIDVSNAIRGKMDELQQNFPQDIEYRIAYDPTVFVRASLQSVAITLLEALVLVVLVVVLFLQTWRASIIPLVAVPVSLVGTFALMHLFGFSLNTLSLFG…	MNISKFFIDRPIFAGVLSVLILLAGLLSVFQLPISEYPEVVPPSVVVRAQYPGANPKVIAETVASPLEESINGVEDMLYMQSQANSDGNLTITVNFKLGIDPDKAQQLVQNRVSQAMPRLPEDVQRLGVTTLKSSPTLTMVVHLTSPDNRYDMTYLRNYAVLNVKDRLARLQGVGEVGLFGSGDYAMRVWLDPQKVAQRNLTATEIVNAIREQNIQVAAGTIGASPSNSPLQLSVNAQGRLTTEQEFADIILKTAPDGAVTRLGDVARVELAASQYGLRSLLDNKQAVAIPIFQAPGANALQVSDQVRSTMKELSKDFPSSIKYDIVYDPTQFVRASIKAVVHTLLEAITLVVVVVILFLQTWRASIIPLLAVPVSIIGTFALMLAFGYSINALSLFGM…	99.62	gnl|BL_ORD_ID|133|hsp_num:0	153			0	3126	tetracycline
	1_3613 # 3815966 # 3816910 # -1 # ID=1_3613;partial=00;start_type=ATG;rbs_motif=GGAG;rbs_spacer=6bp;gc_cont=0.476	1_3613	3815966	3816910	-	Strict	500	562	leuO	86.62	3003843	protein homolog model	n/a	n/a	nucleoside antibiotic; disinfecting agents and antiseptics	antibiotic efflux	major facilitator superfamily (MFS) antibiotic efflux pump	ATGCCAGAGGTCAAAACCGAAAAGCCGCATCTTTTAGATATGGGCAAACCACAGCTTCGCATGGTTGATTTGAACCTATTGACCGTGTTCGATGCGGTAATGCAAGAGCAGAATATTACGCGCGCCGCCCACACGCTGGGAATGTCGCAGCCTGCGGTCAGTAACGCCGTAGCGCGTCTGAAGGTTATGTTTAATGACGAACTTTTTGTTCGATATGGACGAGGAATTCAGCCGACTGCCCGTGCATTTCAGTTATTTGGTTCAGTCCGTCAGGCGTTACAATTGGTGCAAAATGAATTGCCGGGATCGGGGTTTGAGCCGACCAGCAGCGAACGTGTATTCAATCTTTGCGTGTGCAGTCCGCTGGATAATATCCTGACGTCACAGATTTATAATCGT…	MPEVKTEKPHLLDMGKPQLRMVDLNLLTVFDAVMQEQNITRAAHTLGMSQPAVSNAVARLKVMFNDELFVRYGRGIQPTARAFQLFGSVRQALQLVQNELPGSGFEPTSSERVFNLCVCSPLDNILTSQIYNRVEKIAPNIHVVFKASLNQNTEHQLRYQETEFVISYEEFRRPEFTSVPLFKDEMVLVASRKHPRISGPLLEGDVYNEQHAVVSLDRYASFSQPWYDTPDKQSSVAYQGMVLISVLNVVSQTHLVAIAPRWLAEEFAESLDLQILPLPLKLNSRTCYLSWHEAAGRDKGHQWMEDLLVSVCKR	MPEVQTDHPETAELSKPQLRMVDLNLLTVFDAVMQEQNITRAAHALGMSQPAVSNAVARLKVMFNDELFVRYGRGIQPTARAFQLFGSVRQALQLVQNELPGSGFEPASSERVFHLCVCSPLDSILTSQIYNHIEQIAPNIHVMFKSSLNQNTEHQLRYQETEFVISYEDFHRPEFTSVPLFKDEMVLVASKNHPTIKGPLLKHDVYNEQHAAVSLDRFASFSQTWYDTVDKQASIAYQGMAMMSVLSVVSQTHLVAIAPRWLAEEFAESLELQVLPLPLKQNSRTCYLSWHEAAGRDKGHQWMEEQLVSICKR	100	gnl|BL_ORD_ID|4919|hsp_num:0	5921			0	942	acriflavine; puromycin
	1_54 # 57532 # 58923 # 1 # ID=1_54;partial=00;start_type=ATG;rbs_motif=AGGAG;rbs_spacer=6bp;gc_cont=0.552	1_54	57532	58923	+	Strict	850	867.1	Escherichia coli UhpT with mutation conferring resistance to fosfomycin	95.68	3003890	protein variant model	E350Q	n/a	phosphonic acid antibiotic	antibiotic target alteration	antibiotic-resistant UhpT	ATGCTGGCCTTCTTAAACCAGGTGCGCAAGCCGACCCTGGATCTGCCGCTCGATGTGCGGCGTAAAATGTGGTTCAAGCCGTTCATGCAGTCCTATCTGGTGGTTTTTATCGGCTACCTGACCATGTACCTGATCCGCAAAAACTTTAACATCGCGCAGAACGACATGATTTCTACCTACGGGTTGAGCATGACCGAGCTGGGGATGATTGGCCTGGGCTTCTCGATCACCTACGGCGTGGGGAAAACGCTGGTTTCCTACTACGCTGACGGTAAAAATACCAAGCAGTTTCTACCGTTTATGTTGATCCTCTCCGCTATCTGTATGCTCGGCTTCAGCGCCAGCATGGGCGCGGGGTCAACCAGTCTGTTTCTGATGATCGCTTTCTATGCCCTGAGC…	MLAFLNQVRKPTLDLPLDVRRKMWFKPFMQSYLVVFIGYLTMYLIRKNFNIAQNDMISTYGLSMTELGMIGLGFSITYGVGKTLVSYYADGKNTKQFLPFMLILSAICMLGFSASMGAGSTSLFLMIAFYALSGFFQSTGGSCSYSTITKWTPRRKRGTFLGFWNISHNLGGAGAAGVALFGANYLFDGHVIGMFIFPSIIALIVGFIGLRFGSDSPESYGLGKAEELFGEEISEEDKETEENEMTKWQIFVEYVLKNKVIWLLCFSNIFLYVVRIGIDQWSTVYAFQELKLSKEVAIQGFTLFEVGALVGTLLWGWLSDLANGRRALVACVALALIIATLGVYQHASNQYVYLASLFALGFLVFGPQLLIGVAAVGFVPKKAIGAADGIKGTFAYLIG…	MLAFLNQVRKPTLDLPLEVRRKMWFKPFMQSYLVVFIGYLTMYLIRKNFNIAQNDMISTYGLSMTQLGMIGLGFSITYGVGKTLVSYYADGKNTKQFLPFMLILSAICMLGFSASMGSGSVSLFLMIAFYALSGFFQSTGGSCSYSTITKWTPRRKRGTFLGFWNISHNLGGAGAAGVALFGANYLFDGHVIGMFIFPSIIALIVGFIGLRYGSDSPESYGLGKAEELFGEEISEEDKETESTDMTKWQIFVEYVLKNKVIWLLCFANIFLYVVRIGIDQWSTVYAFQELKLSKAVAIQGFTLFEAGALVGTLLWGWLSDLANGRRGLVACIALALIIATLGVYQHASNEYIYLASLFALGFLVFGPQLLIGVAAVGFVPKKAIGAADGIKGTFAYLIG…	100	gnl|BL_ORD_ID|2126|hsp_num:0	2373			0	1389	fosfomycin
	1_390 # 438579 # 439763 # 1 # ID=1_390;partial=00;start_type=GTG;rbs_motif=AGGA;rbs_spacer=8bp;gc_cont=0.542	1_390	438579	439763	+	Strict	700	786.9	Escherichia coli EF-Tu mutants conferring resistance to Pulvomycin	99.49	3003369	protein variant model	R234F	n/a	elfamycin antibiotic	antibiotic target alteration	elfamycin resistant EF-Tu	GTGTCTAAAGAAAAATTTGAACGTACAAAACCGCACGTTAACGTCGGCACCATCGGCCACGTTGACCACGGTAAAACTACCCTGACCGCTGCAATCACCACCGTACTGGCTAAAACCTACGGCGGTGCTGCTCGTGCATTCGACCAGATCGATAACGCGCCGGAAGAAAAAGCGCGTGGTATCACCATCAACACTTCTCACGTTGAATACGATACCCCGACCCGCCACTACGCACACGTAGACTGCCCGGGGCACGCCGACTATGTTAAAAACATGATCACCGGTGCTGCTCAGATGGACGGCGCGATTCTGGTTGTTGCTGCGACTGACGGCCCGATGCCGCAGACCCGTGAGCACATCCTGCTGGGTCGTCAGGTAGGCGTTCCGTACATCATCGTG…	MSKEKFERTKPHVNVGTIGHVDHGKTTLTAAITTVLAKTYGGAARAFDQIDNAPEEKARGITINTSHVEYDTPTRHYAHVDCPGHADYVKNMITGAAQMDGAILVVAATDGPMPQTREHILLGRQVGVPYIIVFLNKCDMVDDEELLELVEMEVRELLSQYDFPGDDTPIVRGSALKALEGDAEWEAKIIELAGFLDSYIPEPERAIDKPFLLPIEDVFSISGRGTVVTGRVERGIIKVGEEVEIVGIKETQKSTCTGVEMFRKLLDEGRAGENVGVLLRGIKREEIERGQVLAKPGTIKPHTKFESEVYILSKDEGGRHTPFFKGYRPQFYFRTTDVTGTIELPEGVEMVMPGDNIKMVVTLIHPIAMDDGLRFAIREGGRTVGAGVVAKVLG	MLSPEGESTIVRNIAVSKEKFERTKPHVNVGTIGHVDHGKTTLTAAITTVLAKTYGGAARAFDQIDNAPEEKARGITINTSHVEYDTPTRHYAHVDCPGHADYVKNMITGAAQMDGAILVVAATDGPMPQTREHILLGRQVGVPYIIVFLNKCDMVDDEELLELVEMEVRELLSQYDFPGDDTPIVRGSALKALEGDAEWEAKILELAGFLDSYIPEPERAIDKPFLLPIEDVFSISGRGTVVTGRVERGIIKVGEEVEIVGIKETQKSTCTGVEMFRKLLDEGRAGENVGVLLRGIKREEIERGQVLAKPGTIKPHTKFESEVYILSKDEGGRHTPFFKGYRPQFYFRTTDVTGTIELPEGVEMVMPGDNIKMVVTLIHPIAMDDGLRFAIREGGRTV…	96.33	gnl|BL_ORD_ID|1969|hsp_num:0	2158			45	1227	pulvomycin
	1_1454 # 1567453 # 1568811 # 1 # ID=1_1454;partial=00;start_type=ATG;rbs_motif=GGAG;rbs_spacer=8bp;gc_cont=0.548	1_1454	1567453	1568811	+	Strict	850	898.7	Escherichia coli GlpT with mutation conferring resistance to fosfomycin	96.9	3003889	protein variant model	E448K	n/a	phosphonic acid antibiotic	antibiotic target alteration	antibiotic-resistant GlpT	ATGTTGAGTATTTTTAAACCAGCGCCGCATAAAGCGCGCTTGCCAGCGGCGGAGATTGATCCGACCTATCGCCGATTACGCTGGCAGATTTTCCTGGGGATATTCTTTGGCTATGCCGCGTATTATCTGGTGCGCAAGAACTTTGCCCTCGCGATGCCCTACCTGGTAGAACAGGGTTTTTCACGCGGCGATCTGGGCTTTGCGTTGTCCGGGATTTCCATCGCTTATGGTTTTTCGAAATTTATAATGGGTTCGGTGTCCGATCGCTCGAATCCGCGCGTTTTTCTGCCGGCAGGGTTGATTCTGGCCGCAGCAGTCATGTTGTTTATGGGCTTTGTGCCGTGGGCGACATCCAGCATCGCCGTGATGTTTGTGCTGTTGTTCCTTTGCGGCTGGTTC…	MLSIFKPAPHKARLPAAEIDPTYRRLRWQIFLGIFFGYAAYYLVRKNFALAMPYLVEQGFSRGDLGFALSGISIAYGFSKFIMGSVSDRSNPRVFLPAGLILAAAVMLFMGFVPWATSSIAVMFVLLFLCGWFQGMGWPPCGRTMVHWWSQKERGGIVSVWNCAHNVGGGIPPLLFLLGMAWFNDWKAALYMPAFGAIVVALFAFAMMRDTPQSCGLPPIEEYKNDYPDDYNEKAEEELTAKQIFMQYVLPNKLLWYIAIANVFVYLLRYGILDWSPTYLKEVKHFALDKSSWAYFLYEYAGIPGTLLCGWMSDKVFRGNRGATGVFFMTLVTIATIVYWMNPAGNPNVDMACMIIIGFLIYGPVMLIGLHALELAPKKAAGTAAGFTGLFGYLGGSVA…	MLSIFKPAPHKARLPAAEIDPTYRRLRWQIFLGIFFGYAAYYLVRKNFALAMPYLVEQGFSRGDLGFALSGISIAYGFSKFIMGSVSDRSNPRVFLPAGLILAAAVMLFMGFVPWATSSIAVMFVLLFLCGWFQGMGWPPCGRTMVHWWSQKERGGIVSVWNCAHNVGGGIPPLLFLLGMAWFNDWHAALYMPAFCAILVALFAFAMMRDTPQSCGLPPIEEYKNDYPDDYNEKAEQELTAKQIFMQYVLPNKLLWYIAIANVFVYLLRYGILDWSPTYLKEVKHFALDKSSWAYFLYEYAGIPGTLLCGWMSDKVFRGNRGATGVFFMTLVTIATIVYWMNPAGNPTVDMICMIVIGFLIYGPVMLIGLHALELAPKKAAGTAAGFTGLFGYLGGSVA…	100	gnl|BL_ORD_ID|2127|hsp_num:0	2372			0	1356	fosfomycin
	1_1465 # 1581069 # 1583705 # 1 # ID=1_1465;partial=00;start_type=ATG;rbs_motif=GGA;rbs_spacer=10bp;gc_cont=0.559	1_1465	1581069	1583705	+	Strict	1500	1679.5	Salmonella enterica gyrA conferring resistance to fluoroquinolones	99.89	3003926	protein variant model	D87Y	D87Y:1545	fluoroquinolone antibiotic	antibiotic target alteration	fluoroquinolone resistant gyrA	ATGAGCGACCTTGCGAGAGAAATTACACCGGTCAACATTGAGGAAGAGCTGAAAAGCTCCTATCTGGATTATGCGATGTCGGTCATTGTTGGCCGTGCGCTGCCGGATGTCCGAGATGGCCTGAAGCCGGTACACCGTCGCGTACTTTACGCCATGAACGTATTGGGCAATGACTGGAACAAAGCCTATAAAAAATCTGCCCGTGTCGTTGGTGACGTAATCGGTAAATACCATCCCCACGGCGATTCCGCAGTGTATTACACCATCGTTCGTATGGCGCAGCCATTCTCGCTGCGTTACATGCTGGTGGATGGTCAGGGTAACTTCGGTTCTATTGACGGCGACTCCGCGGCGGCAATGCGTTATACGGAGATCCGTCTGGCGAAAATCGCCCACGAA…	MSDLAREITPVNIEEELKSSYLDYAMSVIVGRALPDVRDGLKPVHRRVLYAMNVLGNDWNKAYKKSARVVGDVIGKYHPHGDSAVYYTIVRMAQPFSLRYMLVDGQGNFGSIDGDSAAAMRYTEIRLAKIAHELMADLEKETVDFVDNYDGTEKIPDVMPTKIPNLLVNGSSGIAVGMATNIPPHNLTEVINGCLAYIDNEDISIEGLMEHIPGPDFPTAAIINGRRGIEEAYRTGRGKVYIRARAEVEADAKTGRETIIVHEIPYQVNKARLIEKIAELVKDKRVEGISALRDESDKDGMRIVIEVKRDAVGEVVLNNLYSQTQLQVSFGINMVALHHGQPKIMNLKDIISAFVRHRREVVTRRTIFELRKARDRAHILEALAIALANIDPIIELIRR…	MSDLAREITPVNIEEELKSSYLDYAMSVIVGRALPDVRDGLKPVHRRVLYAMNVLGNDWNKAYKKSARVVGDVIGKYHPHGDSAVYDTIVRMAQPFSLRYMLVDGQGNFGSIDGDSAAAMRYTEIRLAKIAHELMADLEKETVDFVDNYDGTEKIPDVMPTKIPNLLVNGSSGIAVGMATNIPPHNLTEVINGCLAYIDNEDISIEGLMEHIPGPDFPTAAIINGRRGIEEAYRTGRGKVYIRARAEVEADAKTGRETIIVHEIPYQVNKARLIEKIAELVKDKRVEGISALRDESDKDGMRIVIEVKRDAVGEVVLNNLYSQTQLQVSFGINMVALHHGQPKIMNLKDIISAFVRHRREVVTRRTIFELRKARDRAHILEALAIALANIDPIIELIRR…	100	gnl|BL_ORD_ID|2156|hsp_num:0	2403			0	2634	ciprofloxacin; nalidixic acid
	1_3606 # 3807987 # 3809753 # -1 # ID=1_3606;partial=00;start_type=ATG;rbs_motif=AGGA;rbs_spacer=12bp;gc_cont=0.547	1_3606	3807987	3809753	-	Strict	500	564.7	Haemophilus influenzae PBP3 conferring resistance to beta-lactam antibiotics	51.85	3004446	protein variant model	D350N, S357N	n/a	cephalosporin; cephamycin; penam	antibiotic target alteration	Penicillin-binding protein mutations conferring resistance to beta-lactam antibiotics	ATGAAAGCAGCGGCAAAAACGCAAAAATCGAAACGCCAGGAAGAACAGACCAACTTCATCAGTTGGCGTTTTGCGTTGCTGTGCGGCTGTATTTTACTGGCGCTGGTTTTTTTACTTGGACGCGCGGCGTGGCTACAGATTATCGCCCCGGATATGCTGGTGCGTCAGGGCGATATGCGTTCGCTGCGTGTTCAGGAAGTCTCCACCTCACGCGGTATGATTACCGACCGTTCCGGGCGTCCACTGGCGGTCAGCGTACCGGTTAAGGCGATCTGGGCCGACCCGAAAGAAGTTCATGACGCCGGCGGCATCAGCGTTGGCGATCGCTGGAAAGCGCTTTCTACTGCGCTCAATATTCCGCTCGATCAGCTCTCCGCCCGTATCAACGCCAACCCGAAA…	MKAAAKTQKSKRQEEQTNFISWRFALLCGCILLALVFLLGRAAWLQIIAPDMLVRQGDMRSLRVQEVSTSRGMITDRSGRPLAVSVPVKAIWADPKEVHDAGGISVGDRWKALSTALNIPLDQLSARINANPKGRFIYLARQVNPDMADYIKKLKLPGIHLREESRRYYPSGEVTAHLIGFTNVDSQGIEGVEKSFDKWLTGQPGERIVRKDRYGRVIEDISSTDSQAAHNLALSIDERLQALVYRELNNAVAFNKAESGSAVLVDVNTGEVLAMANSPSYNPNNLAGTPKDAMRNRTITDVFEPGSTVKPMVVMTALQRGIVNENTVLNTVPYRINGHEIKDVARYSELTLTGVLQKSSNVGVSKLALAMPSSALVDTYSRFGLGKATNLGLVGERSG…	MVKFNSSRKSGKSKKTIRKLTAPETVKQNKPQKVFEKCFMRGRYMLSTVLILLGLCALVARAAYVQSINADTLSNEADKRSLRKDEVLSVRGSILDRNGQLLSVSVPMSAIVADPKTMLKENSLADKERIAALAEELGMTENDLVKKIEKNSKSGYLYLARQVELSKANYIRRLKIKGIILETEHRRFYPRVEEAAHVVGYTDIDGNGIEGIEKSFNSLLVGKDGSRTVRKDKRGNIVAHISDEKKYDAQDVTLSIDEKLQSMVYREIKKAVSENNAESGTAVLVDVRTGEVLAMATAPSYNPNNRVGVKSELMRNRAITDTFEPGSTVKPFVVLTALQRGVVKRDEIIDTTSFKLSGKEIVDVAPRAQQTLDEILMNSSNRGVSRLALRMPPSALMET…	96.39	gnl|BL_ORD_ID|2491|hsp_num:0	2886			63	1758	ceftriaxone; ampicillin; cefaclor; cefotaxime; cefditoren; cefdinir
	1_4136 # 4403084 # 4404268 # -1 # ID=1_4136;partial=00;start_type=ATG;rbs_motif=GAGG;rbs_spacer=8bp;gc_cont=0.540	1_4136	4403084	4404268	-	Strict	700	786.9	Escherichia coli EF-Tu mutants conferring resistance to Pulvomycin	99.49	3003369	protein variant model	R234F	n/a	elfamycin antibiotic	antibiotic target alteration	elfamycin resistant EF-Tu	ATGTCTAAAGAAAAGTTTGAACGTACAAAACCGCACGTTAACGTCGGTACTATCGGCCACGTTGACCATGGTAAAACAACGCTGACCGCTGCCATTACTACCGTACTGGCTAAAACCTACGGCGGTGCCGCCCGCGCATTCGACCAGATCGATAACGCGCCGGAAGAAAAAGCGCGTGGTATCACCATCAACACTTCTCACGTTGAATACGATACCCCGACCCGCCACTACGCACACGTAGACTGCCCGGGGCACGCCGACTATGTTAAAAACATGATCACCGGTGCTGCTCAGATGGACGGCGCGATTCTGGTTGTTGCTGCGACTGACGGCCCGATGCCGCAGACCCGTGAGCACATCCTGCTGGGTCGTCAGGTAGGCGTTCCGTACATCATCGTG…	MSKEKFERTKPHVNVGTIGHVDHGKTTLTAAITTVLAKTYGGAARAFDQIDNAPEEKARGITINTSHVEYDTPTRHYAHVDCPGHADYVKNMITGAAQMDGAILVVAATDGPMPQTREHILLGRQVGVPYIIVFLNKCDMVDDEELLELVEMEVRELLSQYDFPGDDTPIVRGSALKALEGDAEWEAKIIELAGFLDSYIPEPERAIDKPFLLPIEDVFSISGRGTVVTGRVERGIIKVGEEVEIVGIKETQKSTCTGVEMFRKLLDEGRAGENVGVLLRGIKREEIERGQVLAKPGTIKPHTKFESEVYILSKDEGGRHTPFFKGYRPQFYFRTTDVTGTIELPEGVEMVMPGDNIKMVVTLIHPIAMDDGLRFAIREGGRTVGAGVVAKVLG	MLSPEGESTIVRNIAVSKEKFERTKPHVNVGTIGHVDHGKTTLTAAITTVLAKTYGGAARAFDQIDNAPEEKARGITINTSHVEYDTPTRHYAHVDCPGHADYVKNMITGAAQMDGAILVVAATDGPMPQTREHILLGRQVGVPYIIVFLNKCDMVDDEELLELVEMEVRELLSQYDFPGDDTPIVRGSALKALEGDAEWEAKILELAGFLDSYIPEPERAIDKPFLLPIEDVFSISGRGTVVTGRVERGIIKVGEEVEIVGIKETQKSTCTGVEMFRKLLDEGRAGENVGVLLRGIKREEIERGQVLAKPGTIKPHTKFESEVYILSKDEGGRHTPFFKGYRPQFYFRTTDVTGTIELPEGVEMVMPGDNIKMVVTLIHPIAMDDGLRFAIREGGRTV…	96.33	gnl|BL_ORD_ID|1969|hsp_num:0	2158			45	1227	pulvomycin
	1_1592 # 1721616 # 1722338 # -1 # ID=1_1592;partial=00;start_type=ATG;rbs_motif=GAG;rbs_spacer=6bp;gc_cont=0.537	1_1592	1721616	1722338	-	Strict	450	456.8	baeR	94.14	3000828	protein overexpression model	n/a	n/a	aminoglycoside antibiotic; aminocoumarin antibiotic	antibiotic efflux	resistance-nodulation-cell division (RND) antibiotic efflux pump	ATGACTGAATTACCCATTGATGAAAACACGCCGCGCATTTTGATTGTTGAAGATGAACCCAAGCTGGGTCAGCTGCTTATTGACTACTTACGCGCGGCGAGTTACGCCCCCACGCTCATCAATCACGGCGACAAGGTACTGCCGTATGTGCGTCAAACGCCGCCGGATCTGATTCTGCTGGATCTGATGCTGCCGGGTACCGATGGTCTGACGCTATGCCGGGAGATTCGCCGTTTTTCCGACATCCCCATTGTGATGGTCACAGCCAAAATTGAAGAGATCGACCGGCTGCTGGGGCTGGAAATCGGCGCCGATGATTATATCTGTAAGCCTTACAGCCCGCGCGAAGTCGTGGCCCGCGTGAAAACCATTTTGCGCCGCTGTAAACCGCAGCGCGAA…	MTELPIDENTPRILIVEDEPKLGQLLIDYLRAASYAPTLINHGDKVLPYVRQTPPDLILLDLMLPGTDGLTLCREIRRFSDIPIVMVTAKIEEIDRLLGLEIGADDYICKPYSPREVVARVKTILRRCKPQRELQQQDAESPLMIDESRFQASWCGKALDLTPAEFRLLKTLSLEPGKVFSREQLLNHLYDDYRVVTDRTIDSHIKNLRRKLESLDAEQSFIRAVYGVGYRWEADACRLV	MTELPIDENTPRILIVEDEPKLGQLLIDYLRAASYAPSLISHGDQVLPYVRQTPPDLILLDLMLPGTDGLTLCREIRRFSDVPIVMVTAKIEEIDRLLGLEIGADDYICKPYSPREVVARVKTILRRCKPQRELQVLDAESPLIVDESRFQASWRSKLLDLTPAEFRLLKTLSHEPGKVFSREQLLNHLYDDYRVVTDRTIDSHIKNLRRKLEALDAEQSFIRAVYGVGYRWEADACRIA	100	gnl|BL_ORD_ID|1382|hsp_num:0	1337			0	717	neomycin; amikacin; kanamycin A; tobramycin; novobiocin; gentamicin
	1_2193 # 2319687 # 2320121 # -1 # ID=1_2193;partial=00;start_type=TTG;rbs_motif=None;rbs_spacer=None;gc_cont=0.474	1_2193	2319687	2320121	-	Strict	210	273.5	Escherichia coli AcrAB-TolC with MarR mutations conferring resistance to ciprofloxacin and tetracycline	92.36	3003378	protein overexpression model	n/a	n/a	fluoroquinolone antibiotic; cephalosporin; glycylcycline; penam; tetracycline antibiotic; rifamycin antibiotic; phenicol antibiotic; disinfecting agents and antiseptics	antibiotic target alteration; antibiotic efflux	resistance-nodulation-cell division (RND) antibiotic efflux pump	TTGAAAAGCACCAGTGATCTGTTCAATGAAATCATTCCGCTGGGTCGCTTGATCTACATGGTAAATCAAAAAAAAGATCGCCTGTTAAATAACTATTTATCCCCGCTGGATATCACCGCAACACAGTTTAAAGTGCTTTGCTCGATACGCTGCGCGGGATGTATTACCCCGGTTGAACTTAAAAAAGTGCTGTCTGTCGATCTCGGCGCATTGACGCGAATGCTCGACCGCCTGCTGTGCAAAGGCTGGATCGAAAGACTGCCGAATCCTAATGACAAACGCGGCGTACTGGTGAAGCTAACGCCGGACGGCGCGGCAATTTGTGAGCAATGTCATCAACGACCAGGGCAAGACCTGCATCAGGAATTAACAAAAAACTTAACGGCGGACGAAGTGGCA…	LKSTSDLFNEIIPLGRLIYMVNQKKDRLLNNYLSPLDITATQFKVLCSIRCAGCITPVELKKVLSVDLGALTRMLDRLLCKGWIERLPNPNDKRGVLVKLTPDGAAICEQCHQRPGQDLHQELTKNLTADEVATLEYLLKKILP	MKSTSDLFNEIIPLGRLIHMVNQKKDRLLNEYLSPLDITAAQFKVLCSIRCAACITPVELKKVLSVDLGALTRMLDRLVCKGWVERLPNPNDKRGVLVKLTTGGAAICEQCHQLVGQDLHQELTKNLTADEVATLEYLLKKVLP	100	gnl|BL_ORD_ID|1983|hsp_num:0	431			0	432	tigecycline; ciprofloxacin; tetracycline; rifampin; chloramphenicol; ampicillin; cefalotin; triclosan
	1_4040 # 4274722 # 4275180 # -1 # ID=1_4040;partial=00;start_type=ATG;rbs_motif=AGG;rbs_spacer=11bp;gc_cont=0.549	1_4040	4274722	4275180	-	Strict	300	300.4	Escherichia coli soxR with mutation conferring antibiotic resistance	96.05	3003381	protein overexpression model	n/a	n/a	fluoroquinolone antibiotic; cephalosporin; glycylcycline; penam; tetracycline antibiotic; rifamycin antibiotic; phenicol antibiotic; disinfecting agents and antiseptics	antibiotic target alteration; antibiotic efflux	ATP-binding cassette (ABC) antibiotic efflux pump; major facilitator superfamily (MFS) antibiotic efflux pump; resistance-nodulation-cell division (RND) antibiotic efflux pump	ATGGAAAAAAAATCTCCCCGTTTAAAAGCCTTACTGACGCCGGGGGAAGTTGCGAAACGTAGCGGTGTTGCTGTGTCCGCCCTGCACTTCTATGAAAGCAAAGGGCTAATTACCAGTATCCGTAATAGCGGTAACCAACGGCGATACAAGCGTGACGTGTTGCGTTATGTCGCGATTATCAAGATCGCCCAGCGTATCGGCATCCCGCTGGCAACTATCGGCGACGCGTTTGGTATCTTGCCGGAAGGACATACGTTAAGCGCGAAAGAGTGGAAGCAGCTCTCCTCGCAGTGGCGCGAAGAGTTAGACCGACGTATTCATACGCTGGTGGCGTTGCGCGATGAGCTGGACGGTTGTATCGGCTGCGGCTGTTTATCGCGTAGCGACTGTCCGCTGCGA…	MEKKSPRLKALLTPGEVAKRSGVAVSALHFYESKGLITSIRNSGNQRRYKRDVLRYVAIIKIAQRIGIPLATIGDAFGILPEGHTLSAKEWKQLSSQWREELDRRIHTLVALRDELDGCIGCGCLSRSDCPLRNPGDRLGEHGTGARLLEDD	MEKKLPRIKALLTPGEVAKRSGVAVSALHFYESKGLITSIRNSGNQRRYKRDVLRYVAIIKIAQRIGIPLATIGEAFGVLPEGHTLSAKEWKQLSSQWREELDRRIHTLVALRDELDGCIGCGCLSRSDCPLRNPGDRLGEEGTGARLLEDEQN	98.7	gnl|BL_ORD_ID|1972|hsp_num:0	1005			0	456	tigecycline; ciprofloxacin; tetracycline; rifampin; chloramphenicol; ampicillin; nalidixic acid; norfloxacin; cefalotin; triclosan
	1_4041 # 4275267 # 4275590 # 1 # ID=1_4041;partial=00;start_type=ATG;rbs_motif=GAGG;rbs_spacer=7bp;gc_cont=0.515	1_4041	4275267	4275590	+	Strict	200	209.1	Escherichia coli soxS with mutation conferring antibiotic resistance	95.33	3003511	protein overexpression model	n/a	n/a	fluoroquinolone antibiotic; monobactam; carbapenem; cephalosporin; glycylcycline; cephamycin; penam; tetracycline antibiotic; rifamycin antibiotic; phenicol antibiotic; penem; disinfecting agents and antiseptics	antibiotic target alteration; antibiotic efflux; reduced permeability to antibiotic	ATP-binding cassette (ABC) antibiotic efflux pump; major facilitator superfamily (MFS) antibiotic efflux pump; resistance-nodulation-cell division (RND) antibiotic efflux pump; General Bacterial Porin with reduced permeability to beta-lactams	ATGTCGCATCAGCAGATAATTCAGACCCTTATCGAATGGATTGATGAACATATCGACCAACCGCTAAACATTGATGTGGTGGCAAAAAAATCGGGCTACTCCAAGTGGTATTTGCAGCGGATGTTTCGTACGGTAACGCATCAAACATTAGGCGAGTATATTCGCCAGCGCCGTCTCCTGTTGGCGGCCGTTGAGCTACGAACGACCGAGCGCCCGATTTTTGATATCGCGATGGACCTGGGCTATGTATCGCAGCAAACCTTCTCGCGTGTATTCCGCCGCGAGTTCGATCGCACTCCCAGCGATTACCGTCACCGCCTGTAG	MSHQQIIQTLIEWIDEHIDQPLNIDVVAKKSGYSKWYLQRMFRTVTHQTLGEYIRQRRLLLAAVELRTTERPIFDIAMDLGYVSQQTFSRVFRREFDRTPSDYRHRL	MSHQKIIQDLIAWIDEHIDQPLNIDVVAKKSGYSKWYLQRMFRTVTHQTLGDYIRQRRLLLAAVELRTTERPIFDIAMDLGYVSQQTFSRVFRRQFDRTPSDYRHRL	100	gnl|BL_ORD_ID|1974|hsp_num:0	2066			0	321	tigecycline; ciprofloxacin; tetracycline; rifampin; chloramphenicol; ampicillin; norfloxacin; cefalotin; triclosan; enrofloxacin

## Sheet: ID_SA615
Isolate ID	ORF_ID	Contig	Start	Stop	Orientation	Cut_Off	Pass_Bitscore	Best_Hit_Bitscore	Best_Hit_ARO	Best_Identities	ARO	Model_type	SNPs_in_Best_Hit_ARO	Other_SNPs	Drug Class	Resistance Mechanism	AMR Gene Family	Predicted_DNA	Predicted_Protein	CARD_Protein_Sequence	Percentage Length of Reference Sequence	ID	Model_ID	Nudged	Note	Hit_Start	Hit_End	Antibiotic
SA615	1_369 # 421789 # 422421 # -1 # ID=1_369;partial=00;start_type=ATG;rbs_motif=AGGA;rbs_spacer=9bp;gc_cont=0.506	1_369	421789	422421	-	Strict	400	418.3	CRP	99.05	3000518	protein homolog model	n/a	n/a	macrolide antibiotic; fluoroquinolone antibiotic; penam	antibiotic efflux	resistance-nodulation-cell division (RND) antibiotic efflux pump	ATGGTGCTTGGCAAACCGCAAACAGACCCGACTCTTGAATGGTTCTTGTCTCATTGCCACATTCATAAGTACCCGTCAAAGAGCACGCTGATTCACCAGGGTGAAAAAGCAGAAACGCTGTACTACATCGTTAAAGGCTCCGTGGCAGTGCTGATCAAAGATGAAGAAGGGAAAGAAATGATCCTTTCTTATCTGAATCAGGGTGATTTTATTGGTGAACTGGGCCTGTTTGAAGAAGGCCAGGAACGCAGCGCCTGGGTACGTGCGAAAACCGCATGTGAGGTCGCTGAAATTTCCTACAAAAAATTTCGCCAATTAATCCAGGTCAACCCGGATATTCTGATGCGCCTCTCTTCCCAGATGGCTCGTCGCTTACAAGTCACCTCTGAAAAAGTAGGT…	MVLGKPQTDPTLEWFLSHCHIHKYPSKSTLIHQGEKAETLYYIVKGSVAVLIKDEEGKEMILSYLNQGDFIGELGLFEEGQERSAWVRAKTACEVAEISYKKFRQLIQVNPDILMRLSSQMARRLQVTSEKVGNLAFLDVTGRIAQTLLNLAKQPDAMTHPDGMQIKITRQEIGQIVGCSRETVGRILKMLEDQNLISAHGKTIVVYGTR	MVLGKPQTDPTLEWFLSHCHIHKYPSKSKLIHQGEKAETLYYIVKGSVAVLIKDEEGKEMILSYLNQGDFIGELGLFEEGQERSAWVRAKTACEVAEISYKKFRQLIQVNPDILMRLSAQMARRLQVTSEKVGNLAFLDVTGRIAQTLLNLAKQPDAMTHPDGMQIKITRQEIGQIVGCSRETVGRILKMLEDQNLISAHGKTIVVYGTR	100	gnl|BL_ORD_ID|803|hsp_num:0	869			0	630	erythromycin; cloxacillin; oxacillin; norfloxacin
	1_621 # 660339 # 661160 # 1 # ID=1_621;partial=00;start_type=ATG;rbs_motif=AGG;rbs_spacer=9bp;gc_cont=0.536	1_621	660339	661160	+	Strict	500	511.5	bacA	97.07	3002986	protein homolog model	n/a	n/a	peptide antibiotic	antibiotic target alteration	undecaprenyl pyrophosphate related proteins	ATGAGCGATATGCACTCGCTGCTGATAGCGGCAATTTTGGGTGTGGTCGAAGGATTGACGGAGTTTTTGCCGGTATCCAGCACGGGCCATATGATTATTGTGGGTCATCTGCTGGGGTTTGAAGGCGATACGGCCAAGACATTCGAAGTGGTGATTCAACTTGGATCTATTCTGGCGGTCGTGGTGATGTTCTGGCGGCGGTTGTTTGGCCTCATCGGTATTCACTTTGGCCGCCCGCTACAGCGTGAAGGTGAAAGTAAAGGTCGATTAACGTTGATTCACATCCTGCTGGGCATGATTCCGGCGGTGGTGCTGGGGTTAGTCTTTCATGACACGATCAAGTCGCTATTTAACCCAATTAACGTGATGTACGCGCTGGTGGTAGGCGGTCTGTTGCTG…	MSDMHSLLIAAILGVVEGLTEFLPVSSTGHMIIVGHLLGFEGDTAKTFEVVIQLGSILAVVVMFWRRLFGLIGIHFGRPLQREGESKGRLTLIHILLGMIPAVVLGLVFHDTIKSLFNPINVMYALVVGGLLLIAAECLKPKEPRAPGLDDMTYRQAFMIGCFQCLALWPGFSRSGATISGGMLMGVSRYAASEFSFLLAVPMMMGATVLDLYKSWSFLTAADIPMFAVGFVTAFVVALIAIKTFLQLIKRISFIPFAIYRFVVAAAVYVVFF	MSDMHSLLIAAILGVVEGLTEFLPVSSTGHMIIVGHLLGFEGDTAKTFEVVIQLGSILAVVVMFWRRLFGLIGIHFGRPLQHEGESKGRLTLIHILLGMIPAVVLGLLFHDTIKSLFNPINVMYALVVGGLLLIAAECLKPKEPRAPGLDDMTYRQAFMIGCFQCLALWPGFSRSGATISGGMLMGVSRYAASEFSFLLAVPMMMGATALDLYKSWGFLTSGDIPMFAVGFITAFVVALIAIKTFLQLIKRISFIPFAIYRFIVAAAVYVVFF	100	gnl|BL_ORD_ID|1680|hsp_num:0	1820			0	819	bacitracin; bacitracin A; bacitracin B; bacitracin F
	1_1004 # 1063904 # 1064089 # 1 # ID=1_1004;partial=00;start_type=ATG;rbs_motif=AGGAG;rbs_spacer=6bp;gc_cont=0.511	1_1004	1063904	1064089	+	Strict	100	102.4	rsmA	85.25	3005069	protein homolog model	n/a	n/a	fluoroquinolone antibiotic; diaminopyrimidine antibiotic; phenicol antibiotic	antibiotic efflux	resistance-nodulation-cell division (RND) antibiotic efflux pump	ATGCTGATTCTGACTCGTCGAGTTGGTGAGACCCTCATGATTGGCGATGAGGTCACCGTGACAGTTTTAGGGGTGAAGGGCAACCAGGTGCGTATTGGCGTGAACGCCCCGAAAGAAGTTTCTGTCCATCGTGAAGAGATCTACCAGCGTATCCAGGCTGAAAAATCCCAGCAGTCCAGTTACTAA	MLILTRRVGETLMIGDEVTVTVLGVKGNQVRIGVNAPKEVSVHREEIYQRIQAEKSQQSSY	MLILTRRVGETLMVGDDVTVTVLGVKGNQVRIGVNAPKEVAVHREEIYQRIQKEKDQEPNH	100	gnl|BL_ORD_ID|2788|hsp_num:0	3807			0	183	trimethoprim; chloramphenicol
	1_1010 # 1070400 # 1071938 # -1 # ID=1_1010;partial=00;start_type=ATG;rbs_motif=GAGG;rbs_spacer=8bp;gc_cont=0.571	1_1010	1070400	1071938	-	Strict	900	966.5	emrB	95.9	3000074	protein homolog model	n/a	n/a	fluoroquinolone antibiotic	antibiotic efflux	major facilitator superfamily (MFS) antibiotic efflux pump	ATGCAACAGCAAAAACCGCTGGAGGGCGCGCAGCTCGTCATCATGACGATCGCGCTGTCGCTGGCGACATTCATGCAGGTGCTGGACTCCACCATTGCCAACGTGGCGATTCCGACCATCGCCGGGAACCTGGGTTCTTCCCTAAGCCAGGGGACATGGGTTATCACCTCTTTCGGGGTGGCGAACGCTATCTCGATTCCCTTAACCGGCTGGCTGGCGAAACGTTTTGGCGAAGTCAAACTGTTCATGTGGTCGACGGTCGCCTTTGCCGCGGCCTCCTGGGCCTGTGGCGTATCCAGCAGCCTGAATATGCTTATCTTCTTCCGCGTGGTGCAGGGCGTGGTCGCCGGGCCGCTGATTCCGCTCTCGCAAAGCCTGTTGCTGAATAACTATCCGCCT…	MQQQKPLEGAQLVIMTIALSLATFMQVLDSTIANVAIPTIAGNLGSSLSQGTWVITSFGVANAISIPLTGWLAKRFGEVKLFMWSTVAFAAASWACGVSSSLNMLIFFRVVQGVVAGPLIPLSQSLLLNNYPPAKRSIALALWSMTVIVAPICGPILGGYISDNYHWGWIFFINVPIGIAVVLMTLHTLRGRETHTERRRIDAVGLALLVIGIGSLQIMLDRGKELDWFSSQEIIILTVVAVIAISFLIVWELTDDHPIVDLSLFKSRNFTIGCLCISLAYMLYFGAIVLLPQLLQEVYGYTATWAGLASAPVGIIPVILSPIIGRFAHKLDMRRLVTFSFIMYAVCFYWRAWTFEPGMDFGASAWPQFIQGFAVACFFMPLTTITLSGLPPERLAAAS…	MQQQKPLEGAQLVIMTIALSLATFMQVLDSTIANVAIPTIAGNLGSSLSQGTWVITSFGVANAISIPLTGWLAKRVGEVKLFLWSTIAFAIASWACGVSSSLNMLIFFRVIQGIVAGPLIPLSQSLLLNNYPPAKRSIALALWSMTVIVAPICGPILGGYISDNYHWGWIFFINVPIGVAVVLMTLQTLRGRETRTERRRIDAVGLALLVIGIGSLQIMLDRGKELDWFSSQEIIILTVVAVVAICFLIVWELTDDNPIVDLSLFKSRNFTIGCLCISLAYMLYFGAIVLLPQLLQEVYGYTATWAGLASAPVGIIPVILSPIIGRFAHKLDMRRLVTFSFIMYAVCFYWRAYTFEPGMDFGASAWPQFIQGFAVACFFMPLTTITLSGLPPERLAAAS…	100	gnl|BL_ORD_ID|1705|hsp_num:0	1847			0	1536	nalidixic acid
	1_1012 # 1073254 # 1073784 # -1 # ID=1_1012;partial=00;start_type=ATG;rbs_motif=GAGG;rbs_spacer=10bp;gc_cont=0.482	1_1012	1073254	1073784	-	Strict	280	327	emrR	93.14	3000516	protein homolog model	n/a	n/a	fluoroquinolone antibiotic	antibiotic efflux	major facilitator superfamily (MFS) antibiotic efflux pump	ATGGATAGTTCGTTTACGCCCATTGAACAAATGCTAAAATTTCGCGCCAGCCGTCACGAAGACTTTCCTTATCAGGAAATTCTTTTGACTCGTCTTTGTATGCACATGCAAGGCAAGCTCCTGGAAAACCGCAATAAAATGCTGAAGGCTCAAGGGATTAACGAGACGTTGTTTATGGCGTTGATTACGCTGGAGTCTCAGGAAAACCACAGTATTCAGCCGTCTGAATTAAGCTGCGCGCTGGGTTCATCTCGCACCAATGCGACACGCATTGCAGATGAGCTGGAAAAACGCGGCTGGATTGAGCGTCGTGAGAGCGATAACGACCGCCGTTGCCTGCATCTGCAATTAACGGAGAAAGGCCAGGCATTTTTGCAAGAAGTGCTTCCGCCTCAGCAT…	MDSSFTPIEQMLKFRASRHEDFPYQEILLTRLCMHMQGKLLENRNKMLKAQGINETLFMALITLESQENHSIQPSELSCALGSSRTNATRIADELEKRGWIERRESDNDRRCLHLQLTEKGQAFLQEVLPPQHHCLHQLWSSLSTAEKDQLEHITRKLLTRLDQMEQEGTVLEALR	MDSSFTPIEQMLKFRASRHEDFPYQEILLTRLCMHMQSKLLENRNKMLKAQGINETLFMALITLESQENHSIQPSELSCALGSSRTNATRIADELEKRGWIERRESDNDRRCLHLQLTEKGHEFLREVLPPQHNCLHQLWSALSTTEKDQLEQITRKLLSRLDQMEQDGVVLEAMS	100	gnl|BL_ORD_ID|1225|hsp_num:0	1330			0	525	nalidixic acid
	1_1392 # 1514972 # 1516618 # -1 # ID=1_1392;partial=00;start_type=ATG;rbs_motif=GAG;rbs_spacer=6bp;gc_cont=0.541	1_1392	1514972	1516618	-	Strict	400	718.8	ArnT	62.61	3005053	protein homolog model	n/a	n/a	peptide antibiotic	antibiotic target alteration	pmr phosphoethanolamine transferase	ATGATGAAATCGATACGCTATTATCTGGCTTTCGCCGCATTTATCGCGCTCTACTATGTTATTCCTGTCAATAGCCGCCTGCTCTGGCAGCCGGATGAAACGCGCTATGCCGAAATAAGTCGGGAGATGCTGGCGTCTGGCGACTGGATCGTGCCGCATTTTCTGGGATTACGTTATTTTGAAAAACCGATAGCCGGTTACTGGATAAACAGTCTGGGTCAGTGGCTTTTTGGCGCTACCAATTTTGGCGTGCGGGCTGGCGCTATTTTAACGACATTGCTGGCCGCAGCGCTGGTGGCGTGGCTGACGTTCCGCTTATGGCGGGATAAACGTACCGCGTTGCTCGCCTCCGTTATCTTTCTCTCCCTCTTTGCCGTTTACAGTATCGGGACGTATGCG…	MMKSIRYYLAFAAFIALYYVIPVNSRLLWQPDETRYAEISREMLASGDWIVPHFLGLRYFEKPIAGYWINSLGQWLFGATNFGVRAGAILTTLLAAALVAWLTFRLWRDKRTALLASVIFLSLFAVYSIGTYAVLDPMIALWLTAGMCCFWQGMQATTRTGKIGMFLLLGATCGLGVLTKGFLALAVPVVSVLPWVIVQKRWKDFLLYGWLAVLSCFVVVLPWAIAIARREADFWHYFFWVEHIQRFAMSDAQHKAPFWYYLPVLLAGSLPWLGLLPGALKLGWRERNGAFYLLGWTIMPLLFFSIAKGKLPTYVLSCFAPIAILMARFVLHNVKEGVAALRVNGGINLVFGIIGIVAAFVVSSWGPLKSPVWTHIETYKVFCVWGVFTVWAFVGWYSL…	MKSIRYGVSLIALFALYYLLPLNFRLLWQPDETRYAEISREMLATGDWVVPHFLGLRYFEKPIAGYWINSIGQWLFGHNNFGVRFGSVFAITMTALLVAWLAWRIFRDKRVAILSLIIFLTAMLVYAIGTYAVLDPMITLWLALAMCSFWGAVQAHSRSGKILGYVLLGVACGMGVMTKGFLALAVPVVGVLPWVIARKRWREVLTYGWLAVIVCTLVVLPWGLAIAQREPDFWRYFFWVEHIQRFAEKDAQHKAPFWYYIPFLIAGSLPWLALLPGALKRGWLERDEARGALYLLGWVAMPFLFFSIAKGKLPTYILPCFAPLSILMARYALEAAKTGAKALRINGMINLGVGLLGLIAVLVVSPWGFMHKPVWTKIELYKCLLAAIAFAVWALMGWL…	99.46	gnl|BL_ORD_ID|2779|hsp_num:0	3795			0	1653	colistin A; colistin B
	1_1395 # 1519490 # 1520473 # -1 # ID=1_1395;partial=00;start_type=ATG;rbs_motif=AGGA;rbs_spacer=8bp;gc_cont=0.538	1_1395	1519490	1520473	-	Strict	550	554.7	PmrF	87.42	3003578	protein homolog model	n/a	n/a	peptide antibiotic	antibiotic target alteration	pmr phosphoethanolamine transferase	ATGTTTGACGCCGCCCCCATAAAAAAAGTCTCGGTGGTTATTCCTGTCTATAACGAACAGGAAAGCCTGCCGGAATTGATAAGACGCACCACCGCCGCCTGCGAGAGTCTGGGCAAAGCGTGGGAGATTTTATTGATAGATGATGGTAGCAGCGATAGCTCGGCGGAGCTGATGGTTAAGGCGTCCCAGGAAGCCGATAGCCATATCATCTCTATTTTACTCAACCGTAACTACGGTCAACATGCAGCGATCATGGCGGGGTTTAGCCATGTAAGCGGCGATCTCATCATTACGCTGGATGCCGATCTGCAAAACCCGCCGGAAGAGATCCCGCGCCTGGTGGCGAAAGCCGATGAAGGGTTCGATGTGGTAGGCACCGTGCGCCAGAACCGACAGGAC…	MFDAAPIKKVSVVIPVYNEQESLPELIRRTTAACESLGKAWEILLIDDGSSDSSAELMVKASQEADSHIISILLNRNYGQHAAIMAGFSHVSGDLIITLDADLQNPPEEIPRLVAKADEGFDVVGTVRQNRQDSLFRKSASKIINLLIQRTTGKAMGDYGCMLRAYRRPIIDTMLRCHERSTFIPILANIFARRATEIPVHHAEREFGDSKYSFMRLINLMYDLVTCLTTTPLRLLSLLGSVIAIGGFSLSVLLIVLRLALGPQWAAEGVFMLFAVLFTFIGAQFIGMGLLGEYIGRIYNDVRARPRYFVQQVIYPESTPFTEESHQ	MFEIHPVKKVSVVIPVYNEQESLPELIRRTTTACESLGKEYEILLIDDGSSDNSAHMLVEASQAENSHIVSILLNRNYGQHSAIMAGFSHVTGDLIITLDADLQNPPEEIPRLVAKADEGYDVVGTVRQNRQDSWFRKTASKMINRLIQRTTGKAMGDYGCMLRAYRRHIVDAMLHCHERSTFIPILANIFARRAIEIPVHHAEREFGESKYSFMRLINLMYDLVTCLTTTPLRMLSLLGSIIAIGGFSIAVLLVILRLTFGPQWAAEGVFMLFAVLFTFIGAQFIGMGLLGEYIGRIYTDVRARPRYFVQQVIRPSSKENE	101.55	gnl|BL_ORD_ID|1936|hsp_num:0	2014			0	954	polymyxin B
	1_1668 # 1820416 # 1821840 # 1 # ID=1_1668;partial=00;start_type=TTG;rbs_motif=AGG;rbs_spacer=6bp;gc_cont=0.538	1_1668	1820416	1821840	+	Strict	900	909.1	MdtK	99.16	3001327	protein homolog model	n/a	n/a	fluoroquinolone antibiotic	antibiotic efflux	multidrug and toxic compound extrusion (MATE) transporter	TTGAACGTCTCCACTGCCTTACGCCAGGCTGTCGTCCGTACGCCCTGGTATGCCAAACGCAAGAGCTACAAAGTGTTGTTCTGGCGTGAAATCACCCCACTTGCTATCCCTATTTTTCTGGAAAATACCTGTGTTTTGCTAATGGGCGTGCTCAGTACTTTTCTCGTCAGTTGGCTGGGCAAGGAAGCAATGGCGGGCGTGGGGCTTGCCGACAGTTTTAATATGGTAATTATGGCTTTTTTTGCGGCTATCGATCTTGGTACTACGGTGGTGGTTGCCTTTAGCCTGGGCAAGCGCGACAGGCGACGGGCAAGGGCGGCGGCGCGCCAGTCGCTGGTGATTATGACGCTATTTGCCGTTGTGCTGGCAGTGGTCATTCATTATTTCGGCAGTGAAATT…	MNVSTALRQAVVRTPWYAKRKSYKVLFWREITPLAIPIFLENTCVLLMGVLSTFLVSWLGKEAMAGVGLADSFNMVIMAFFAAIDLGTTVVVAFSLGKRDRRRARAAARQSLVIMTLFAVVLAVVIHYFGSEIINIVAGEATSEVKGLALTYLELTVLSYPAAAIALIGSGALRGAGNTKIPLMINGGMNILNIIISSILIYGAFSWQGLGFAGAGLGLTISRYIGAVAIIWVLMIGFNPALRIPLKSYLKPLNFGIIWEVMGIGIPASIESVLFNGGKLLTQMFVAGMGTNVIAGNFIAFSVAALINLPGNALGSASTIITGKRLGTGQIGQAERQLRHVFWMSTIVLTAIAWGTAPFAGLFASFYTQEQDVKEVVKVLLWLNAVFMPIWAAAWVLPS…	MNVSTALRQAVVRTPWYAKRKSYKVLFWREITPLAIPIFLENTCVLLMGVLSTFLVSWLGKEAMAGVGLADSFNMVIMAFFAAIDLGTTVVVAFSLGKRDRRRARAAARQSLVIMTLFAVVLAVVIHYFGSEIINIVAGEATPEVKGLALTYLELTVLSYPAAAIALIGSGALRGAGNTKIPLMINGGMNILNIIISSILIYGAFSWQGLGFAGAGLGLTISRYIGAVAIIWVLMIGFNPALRIPLKSYLKPLNFGIIWEVMGIGIPASIESVLFNGSKLLTQMFVAGMGTNVIAGNFIAFSVAALINLPGNALGSASTIITGKRLGTGQIGQAERQLRHVFWMSTIVLTAIAWGTAPFAGLFASFYTQEQDVKEVVKVLLWLNAAFMPIWAAAWVLPS…	100	gnl|BL_ORD_ID|1649|hsp_num:0	1752			0	1422	ciprofloxacin
	1_2111 # 2250561 # 2250923 # 1 # ID=1_2111;partial=00;start_type=ATG;rbs_motif=AGGAG;rbs_spacer=7bp;gc_cont=0.446	1_2111	2250561	2250923	+	Strict	150	169.1	Klebsiella pneumoniae KpnE	76.67	3004580	protein homolog model	n/a	n/a	macrolide antibiotic; aminoglycoside antibiotic; cephalosporin; tetracycline antibiotic; peptide antibiotic; rifamycin antibiotic; disinfecting agents and antiseptics	antibiotic efflux	small multidrug resistance (SMR) antibiotic efflux pump	ATGTTTTACTGGATTTTATTAGCTCTGGCTATCGCGACTGAAATTACCGGCACGCTCTCAATGAAATGGGCTAGCGTGGGTAATGGCAATGCGGGTTTTATTTTAATGCTGGTGATGATCACGCTGTCATATATATTTCTTTCTTTTGCGGTAAAAAAGATTGCCCTGGGTGTAGCGTATGCCTTATGGGAAGGGATCGGCATTTTATTTATTACCATTTTTAGCGTGCTGCTATTTGATGAAGCATTATCAACCATGAAGATTGCCGGCTTGCTGACGCTGGTCGCCGGCATAGTATTGATCAAATCAGGGACGCGTAAACCCGGCAAACCGGTGAAGGAGGCGACTCGTGCAACAATTTGA	MFYWILLALAIATEITGTLSMKWASVGNGNAGFILMLVMITLSYIFLSFAVKKIALGVAYALWEGIGILFITIFSVLLFDEALSTMKIAGLLTLVAGIVLIKSGTRKPGKPVKEATRATI	MFYWILLALAIIAEITGTLSMKWASVSGGHTGFILMLAMIALSYIFLAFAVKKIALGVAYALWEGIGILLITLFSVLLFDESLSLLKIAGLTTLVIGIVLIKSGTQKKASSQQEVAHAAV	100	gnl|BL_ORD_ID|2715|hsp_num:0	3283			0	360	erythromycin; streptomycin; tetracycline; cefepime; ceftriaxone; rifampin; colistin A; colistin B; triclosan; benzalkonium chloride; chlorhexidine
	1_2112 # 2250910 # 2251239 # 1 # ID=1_2112;partial=00;start_type=GTG;rbs_motif=AGGAG;rbs_spacer=7bp;gc_cont=0.558	1_2112	2250910	2251239	+	Strict	150	189.1	Klebsiella pneumoniae KpnF	87.16	3004583	protein homolog model	n/a	n/a	macrolide antibiotic; aminoglycoside antibiotic; cephalosporin; tetracycline antibiotic; peptide antibiotic; rifamycin antibiotic; disinfecting agents and antiseptics	antibiotic efflux	small multidrug resistance (SMR) antibiotic efflux pump	GTGCAACAATTTGAATGGATACACGGCGCCTGGCTTGGGCTGGCAATAATGCTGGAAATCGCGGCTAACGTACTGTTGAAATTTTCGGACGGCTTTCGCCGTAAATGCTATGGCATCTTATCGCTTGCCGCTGTTCTGGCCGCCTTCAGCGCGCTTTCCCAGGCGGTAAAAGGGATAGACCTGTCGGTGGCGTATGCGTTATGGGGCGGTTTTGGTATTGCCGCCACGCTGGCGGCGGGCTGGGTGCTCTTCGGCCAGCGCTTAAACCCCAAAGGCTGGGTTGGCGTGATATTGCTGCTCGCCGGAATGGTCATGATCAAATTTGCCTGA	MQQFEWIHGAWLGLAIMLEIAANVLLKFSDGFRRKCYGILSLAAVLAAFSALSQAVKGIDLSVAYALWGGFGIAATLAAGWVLFGQRLNPKGWVGVILLLAGMVMIKFA	MQQFEWIHAAWLAIAIVLEIIANVFLKFSDGFRRKIYGILSLAAVLGAFSALSQAVKGIDLSVAYALWGGFGIAATIAAGWVLFGQRLNNKGWAGVILLVAGMVLIKLA	100	gnl|BL_ORD_ID|2717|hsp_num:0	3286			0	327	erythromycin; streptomycin; tetracycline; cefepime; ceftriaxone; rifampin; colistin A; colistin B; triclosan; benzalkonium chloride; chlorhexidine
	1_2149 # 2287420 # 2287803 # -1 # ID=1_2149;partial=00;start_type=ATG;rbs_motif=GAGG;rbs_spacer=7bp;gc_cont=0.471	1_2149	2287420	2287803	-	Strict	230	247.3	marA	95.24	3000263	protein homolog model	n/a	n/a	fluoroquinolone antibiotic; monobactam; carbapenem; cephalosporin; glycylcycline; cephamycin; penam; tetracycline antibiotic; rifamycin antibiotic; phenicol antibiotic; penem; disinfecting agents and antiseptics	antibiotic efflux; reduced permeability to antibiotic	resistance-nodulation-cell division (RND) antibiotic efflux pump; General Bacterial Porin with reduced permeability to beta-lactams	ATGTCCAGACGCAACACTGACGCTATTACTATTCATAGCATTTTGGACTGGATCGAGGATAACCTGGAGTCGCCGCTCTCACTGGAAAAAGTGTCTGAGCGTTCAGGATATTCCAAATGGCACCTGCAACGGATGTTTAAAAAAGAGACCGGTCATTCATTAGGCCAATACATCCGCAGCCGTAAAATGACGGAAATCGCGCAAAAATTAAAAGAGAGCAACGAGCCCATTCTCTATCTGGCGGAACGCTATGGCTTTGAGTCACAGCAAACATTGACCCGGACGTTCAAAAACTACTTTGATGTGCCGCCACACAAATACCGGATCACCAATATGCATGGCGAATCACGGTATATGCTGCCGCTGAACCATGGCAACTACTAG	MSRRNTDAITIHSILDWIEDNLESPLSLEKVSERSGYSKWHLQRMFKKETGHSLGQYIRSRKMTEIAQKLKESNEPILYLAERYGFESQQTLTRTFKNYFDVPPHKYRITNMHGESRYMLPLNHGNY	MSRRNTDAITIHSILDWIEDNLESPLSLEKVSERSGYSKWHLQRMFKKETGHSLGQYIRSRKMTEIAQKLKESNEPILYLAERYGFESQQTLTRTFKNYFDVPPHKYRMTNMQGESRFLHPLNHYNS	100	gnl|BL_ORD_ID|1771|hsp_num:0	1922			0	378	tigecycline; tetracycline; rifampin; chloramphenicol; ampicillin; cefalotin; triclosan
	1_2244 # 2393159 # 2393596 # 1 # ID=1_2244;partial=00;start_type=ATG;rbs_motif=AGGAG;rbs_spacer=7bp;gc_cont=0.523	1_2244	2393159	2393596	+	Strict	275	298.1	AAC(6')-Iy	97.24	3002569	protein homolog model	n/a	n/a	aminoglycoside antibiotic	antibiotic inactivation	AAC(6')	ATGGACATCAGGCAAATGAACAAAACCCATCTGGAGCACTGGCGCGGATTGCGAAAACAGCTCTGGCCCGGTCACCCGGATGACGCCCATCTGGCAGACGGCGAAGAAATCCTGCAAGCCGATCATTTGGCATCATTTGTTGCGATGGCAGACGGGGTGGCGATTGGCTTTGCGGATGCCTCAATCCGCCACGATTATGTCAATGGCTGTGACAGTTCGCCCGTGGCTTTTCTTGAAGGTATTTTTGTTCTCCCCTCGTTCCGTCAACGCGGCGTAGCGAAACAATTGATTGCAGCGGTGCAACGATGGGGAACGAATAAAGGGTGTCGGGAAATGGCCTCTGATACCACGCCGGAAAATACAATTTCCCAGAAAGTTCACCTGGCATTAGGATTTGAG…	MDIRQMNKTHLEHWRGLRKQLWPGHPDDAHLADGEEILQADHLASFVAMADGVAIGFADASIRHDYVNGCDSSPVAFLEGIFVLPSFRQRGVAKQLIAAVQRWGTNKGCREMASDTTPENTISQKVHLALGFEETERVIFYRKRC	MDIRQMNKTHLEHWRGLRKQLWPGHPDDAHLADGEEILQADHLASFIAMADGVAIGFADASIRHDYVNGCDSSPVVFLEGIFVLPSFRQRGVAKQLIAAVQRWGTNKGCREMASDTSPENTISQKVHQALGFEETERVIFYRKRC	100	gnl|BL_ORD_ID|330|hsp_num:0	360			0	435	dibekacin; amikacin; sisomicin; netilmicin; tobramycin; 2'-N-ethylnetilmicin; 5-episisomicin
	1_2403 # 2550216 # 2550629 # 1 # ID=1_2403;partial=00;start_type=ATG;rbs_motif=GAG;rbs_spacer=9bp;gc_cont=0.454	1_2403	2550216	2550629	+	Strict	240	245.7	H-NS	94.89	3000676	protein homolog model	n/a	n/a	macrolide antibiotic; fluoroquinolone antibiotic; cephalosporin; cephamycin; penam; tetracycline antibiotic	antibiotic efflux	major facilitator superfamily (MFS) antibiotic efflux pump; resistance-nodulation-cell division (RND) antibiotic efflux pump	ATGAGCGAAGCACTTAAAATTCTGAACAACATCCGTACTCTTCGTGCGCAGGCAAGAGAATGTACTCTGGAAACGCTTGAAGAAATGCTGGAAAAATTAGAAGTTGTCGTTAATGAGCGTCGTGAAGAAGAAAGCGCTGCTGCTGCTGAAGTGGAAGAACGCACTCGTAAACTGCAACAGTATCGTGAAATGTTAATTGCCGACGGCATTGACCCGAATGAACTGCTGAATAGCATGGCTGCCGCTAAATCCGGTACCAAAGCTAAACGCGCAGCTCGTCCGGCTAAATATAGCTATGTTGACGAAAACGGTGAAACTAAAACCTGGACTGGCCAGGGTCGTACACCGGCTGTAATCAAAAAAGCAATGGAAGAACAAGGTAAGCAACTGGAAGATTTC…	MSEALKILNNIRTLRAQARECTLETLEEMLEKLEVVVNERREEESAAAAEVEERTRKLQQYREMLIADGIDPNELLNSMAAAKSGTKAKRAARPAKYSYVDENGETKTWTGQGRTPAVIKKAMEEQGKQLEDFLIKE	MSEALKILNNIRTLRAQARECTLETLEEMLEKLEVVVNERREEESAAAAEVEERTRKLQQYREMLIADGIDPNELLNSLAAVKSGTKAKRAQRPAKYSYVDENGETKTWTGQGRTPAVIKKAMDEQGKSLDDFLIKQ	100	gnl|BL_ORD_ID|1144|hsp_num:0	1248			0	411	erythromycin; cloxacillin; ciprofloxacin; tetracycline; oxacillin; norfloxacin
	1_2621 # 2764208 # 2764930 # -1 # ID=1_2621;partial=00;start_type=ATG;rbs_motif=None;rbs_spacer=None;gc_cont=0.492	1_2621	2764208	2764930	-	Strict	470	488.4	sdiA	99.58	3000826	protein homolog model	n/a	n/a	fluoroquinolone antibiotic; cephalosporin; glycylcycline; penam; tetracycline antibiotic; rifamycin antibiotic; phenicol antibiotic; disinfecting agents and antiseptics	antibiotic efflux	resistance-nodulation-cell division (RND) antibiotic efflux pump	ATGCAGGAAAATGATTTCTTCACCTGGCGACGCGCAATGTTGTTACGCTTTCAGGAGATGGCGGCAGCAGAGGATGTTTATACTGAATTGCAATATCAGACACAGCGGCTGGAATTTGATTATTATGCCCTGTGTGTTCGTCATCCCGTCCCCTTTACCCGGCCTAAAATATCGCTTCGTACCACTTATCCTCCGGCGTGGGTAACGCATTACCAGTCCGAAAACTATTTTGCGATCGATCCGGTATTAAAGCCGGAAAATTTCAGGCAGGGTCATTTACATTGGGATGACGTGCTATTTCATGAAGCGCAGGCGATGTGGGATGCCGCCCAGCGTTTCGGATTACGCAGAGGCGTAACCCAGTGTGTGATGTTGCCGAACCGGGCGCTGGGCTTTTTA…	MQENDFFTWRRAMLLRFQEMAAAEDVYTELQYQTQRLEFDYYALCVRHPVPFTRPKISLRTTYPPAWVTHYQSENYFAIDPVLKPENFRQGHLHWDDVLFHEAQAMWDAAQRFGLRRGVTQCVMLPNRALGFLSFSRSSLRCSSFTYDEVELRLQLLARESLSALTRFEDDMVMAPEMRFSKREKEILKWTAEGKTSSEIAIILSISENTVNFHQKNMQKKFNAPNKTQIACYAAATGLI	MQENDFFTWRRAMLLRFQEMAAAEDVYTELQYQTQRLEFDYYALCVRHPVPFTRPKISLRTTYPPAWVTHYQSENYFAIDPVLKPENFRQGHLHWDDVLFHEAKAMWDAAQRFGLRRGVTQCVMLPNRALGFLSFSRSSLRCSSFTYDEVELRLQLLARESLSALTRFEDDMVMAPEMRFSKREKEILKWTAEGKTSSEIAIILSISENTVNFHQKNMQKKFNAPNKTQIACYAAATGLI	100	gnl|BL_ORD_ID|208|hsp_num:0	228			0	720	tigecycline; tetracycline; rifampin; chloramphenicol; ampicillin; cefalotin; triclosan
	1_2791 # 2932277 # 2934025 # -1 # ID=1_2791;partial=00;start_type=ATG;rbs_motif=None;rbs_spacer=None;gc_cont=0.516	1_2791	2932277	2934025	-	Strict	1000	1067.4	msbA	96.39	3003950	protein homolog model	n/a	n/a	nitroimidazole antibiotic	antibiotic efflux	ATP-binding cassette (ABC) antibiotic efflux pump	ATGCATAACGATAAAGATCTCTCTACGTGGCAGACCTTCCGCCGACTGTGGCCAACCATAGCGCCTTTTAAAGCAGGTCTGATCGTGGCGGGCATAGCGTTAATTCTCAACGCAGCCAGCGATACCTTCATGCTATCGCTCCTCAAGCCATTACTGGATGATGGTTTCGGTAAAACGGATCGCTCAGTGTTGCTGTGGATGCCGCTGGTGGTTATTGGGCTGATGATATTACGAGGCATCACTAGCTATATCTCCAGCTACTGTATTTCATGGGTGTCAGGCAAGGTGGTAATGACCATGCGCCGTCGCCTGTTTGGCCATATGATGGGAATGCCCGTCGCCTTCTTTGATAAACAGTCTACCGGTACGCTGCTGTCGCGTATTACTTACGATTCAGAA…	MHNDKDLSTWQTFRRLWPTIAPFKAGLIVAGIALILNAASDTFMLSLLKPLLDDGFGKTDRSVLLWMPLVVIGLMILRGITSYISSYCISWVSGKVVMTMRRRLFGHMMGMPVAFFDKQSTGTLLSRITYDSEQVASSSSGALITVVREGASIIGLFIMMFYYSWQLSIILVVLAPIVSIAIRVVSKRFRSISKNMQNTMGQVTTSAEQMLKGHKEVLIFGGQEVETKRFDKVSNKMRLQGMKMVSASSISDPIIQLIASLALAFVLYAASFPSVMDSLTAGTITVVFSSMIALMRPLKSLTNVNAQFQRGMAACQTLFAILDSEQEKDEGKRVIDRATGDLEFRNVTFTYPGREVPALRNINLKIPAGKTVALVGRSGSGKSTIASLITRFYDIDEGH…	MHNDKDLSTWQTFRRLWPTIAPFKAGLIVAGVALILNAASDTFMLSLLKPLLDDGFGKTDRSVLVWMPLVVIGLMILRGITSYVSSYCISWVSGKVVMTMRRRLFGHMMGMPVSFFDKQSTGTLLSRITYDSEQVASSSSGALITVVREGASIIGLFIMMFYYSWQLSIILIVLAPIVSIAIRVVSKRFRNISKNMQNTMGQVTTSAEQMLKGHKEVLIFGGQEVETKRFDKVSNRMRLQGMKMVSASSISDPIIQLIASLALAFVLYAASFPSVMDSLTAGTITVVFSSMIALMRPLKSLTNVNAQFQRGMAACQTLFTILDSEQEKDEGKRVIERATGDVEFRNVTFTYPGRDVPALRNINLKIPAGKTVALVGRSGSGKSTIASLITRFYDIDEGE…	100	gnl|BL_ORD_ID|2183|hsp_num:0	2423			0	1746	metronidazole
	1_2866 # 3020996 # 3022228 # -1 # ID=1_2866;partial=00;start_type=ATG;rbs_motif=GAG;rbs_spacer=5bp;gc_cont=0.554	1_2866	3020996	3022228	-	Strict	700	700.7	Escherichia coli mdfA	87.71	3001328	protein homolog model	n/a	n/a	tetracycline antibiotic; disinfecting agents and antiseptics	antibiotic efflux	major facilitator superfamily (MFS) antibiotic efflux pump	ATGCAGAATCGTTTACAATCAGGCGGCAGGCTGGGACGTCAGGCGCTGCTTTTTCCTCTCTGTCTGGTGCTGTACGAATTTTCTACTTATATTGGCAACGACATGATCCAGCCGGGTATGCTGGCGGTGGTTGAGCAGTATCAGGCGTGCCTGGACTGGGTTCCGACGTCCATGACCGCTTATCTGGCGGGCGGTATGTTCTTACAGTGGCTGCTTGGCCCGTTGTCTGACCGGATTGGCCGTCGTCCCGTGATGCTGGCGGGCGTCGTGTGGTTTATTGTCACCTGCCTGGCGACGTTACTGGCGAAAAACATCGAACAATTTACCTTCCTGCGTTTTTTGCAAGGGATTAGCCTGTGTTTTATCGGCGCTGTAGGGTATGCCGCGATTCAGGAGTCC…	MQNRLQSGGRLGRQALLFPLCLVLYEFSTYIGNDMIQPGMLAVVEQYQACLDWVPTSMTAYLAGGMFLQWLLGPLSDRIGRRPVMLAGVVWFIVTCLATLLAKNIEQFTFLRFLQGISLCFIGAVGYAAIQESFEEAVCIKITALMANVALIAPLLGPLVGAAWVHVLPWEGMFILFAALAAIAFFGLQRAMPETATRRGETLSFKALGRDYRLVIKNRRFVAGALALGFVSLPLLAWIAQSPIIIISGEQLSSYEYGLLQVPVFGALIAGNLVLARLTSRRTVRSLIVMGGWPIVAGLIIAAAATVVSSHAYLWMTAGLSVYAFGIGLANAGLVRLTLFSSDMSKGTVSAAMGMLQMLIFTVGIEVSKHAWLSGGNGLFSLFNLANGILWLLLMLVFL…	MQNKLASGARLGRQALLFPLCLVLYEFSTYIGNDMRQPGMLENVEQYQAGIEWVPTSMNAYLAGGMFIQWLLGPLSDRIGRRPVMLAGVVWFIVTCLAILLAQNIEQFTLLRFLHGISLCFIGAVGYDAIQESFEEAVCIKITALMANVALIAPLLGPLVGASWIHVLPWEGMFVLFAALAAISFFGLQRAMPETATRIGEKLSLKELGRDYKLVLKNGRFVAGALALGFLSLPLLAWIAQSPIIIITGEQLSSYEYGLLQVPIFGALIAGNLLLARLTSRRTVRSLIIMGGWPIMIGLLVAAAATVISSHAYLWMTAGLSIYAFGIGLANAGLVRLTLFASVMSKGTVSAAMGMLQMLIFTVGIEISKHAWLNGGNGLFNLFNLVNGILLLSLMVIFL…	100	gnl|BL_ORD_ID|2417|hsp_num:0	37			0	1221	tetracycline; benzalkonium chloride
	1_3016 # 3180528 # 3181205 # 1 # ID=1_3016;partial=00;start_type=GTG;rbs_motif=GAGGA;rbs_spacer=3bp;gc_cont=0.563	1_3016	3180528	3181205	+	Strict	400	422.9	kdpE	91.96	3003841	protein homolog model	n/a	n/a	aminoglycoside antibiotic	antibiotic efflux	kdpDE	GTGACAAACGTTCTGATTGTTGAAGATGAACAGGCCATCCGCCGCTTTCTGCGCGCCGCGCTGGAAGGCGACGGCCTGCGCGTGTATGAAGCTGAAACATTACAACGTGGTTTACTGGAAGCCGCCACGCGAAAGCCCGATCTGATTATTCTCGATCTCGGCCTGCCGGACGGCGACGGAATCGATTTCATTCGCGACCTGCGTCAGTGGAGCGCAATACCGGTGATTGTCCTTTCCGCCCGCAGCGAAGAAAGCGATAAGATTGCCGCGCTTGACGCCGGAGCTGATGATTACCTGAGCAAGCCATTCGGCATTGGCGAGTTGCAGGCGCGTTTGCGTGTCGCGCTGCGACGGCACGCCGCCAGCCCTAGCGCCGATCCGATCGTCCGTTTTTCCGGC…	MTNVLIVEDEQAIRRFLRAALEGDGLRVYEAETLQRGLLEAATRKPDLIILDLGLPDGDGIDFIRDLRQWSAIPVIVLSARSEESDKIAALDAGADDYLSKPFGIGELQARLRVALRRHAASPSADPIVRFSGVTVDLAARLIHRGDEEIHLTPIEFRLLAVLLNNTGKVLTQRQLLNQVWGPNAVEHSHYLRIYMGHLRQKLEQDPTRPRHFITETGIGYRFMP	MTNVLIVEDEQAIRRFLRTALEGDGMRVFEAETLQRGLLEAATRKPDLIILDLGLPDGDGIEFIRDLRQWSAVPVIVLSARSEESDKIAALDAGADDYLSKPFGIGELQARLRVALRRHSATTAPDPLVKFSDVTVDLAARVIHRGEEEVHLTPIEFRLLAVLLNNAGKVLTQRQLLNQVWGPNAVEHSHYLRIYMGHLRQKLEQDPARPRHFITETGIGYRFML	100	gnl|BL_ORD_ID|2101|hsp_num:0	2331			0	672	kanamycin A
	1_3232 # 3406630 # 3407823 # 1 # ID=1_3232;partial=00;start_type=ATG;rbs_motif=GAGG;rbs_spacer=7bp;gc_cont=0.554	1_3232	3406630	3407823	+	Strict	670	691	Escherichia coli acrA	91.69	3004043	protein homolog model	n/a	n/a	fluoroquinolone antibiotic; cephalosporin; glycylcycline; penam; tetracycline antibiotic; rifamycin antibiotic; phenicol antibiotic; disinfecting agents and antiseptics	antibiotic efflux	resistance-nodulation-cell division (RND) antibiotic efflux pump	ATGAACAAAAACAGAGGGTTAACGCCTCTGGCGGTCGTTCTGATGCTCTCAGGCAGCTTAGCGCTAACAGGATGTGACGACAAACAGGACCAGCAAGGCGGCCAGCAGATGCCAGAAGTTGGAGTTGTCACACTAAAAACGGAACCACTGCAAATCACAACTGAACTTCCGGGTCGTACCGTTGCTTACCGTATCGCCGAAGTTCGCCCACAGGTAAGCGGCATTATCCTGAAGCGTAATTTCGTTGAGGGAAGTGATATCGAAGCGGGAGTCTCTCTCTATCAGATTGATCCTGCGACCTACCAGGCGACTTACGACAGCGCTAAGGGCGATCTGGCAAAAGCGCAGGCCGCCGCGAATATCGCTGAACTGACGGTGAAGCGTTATCAAAAGCTGCTG…	MNKNRGLTPLAVVLMLSGSLALTGCDDKQDQQGGQQMPEVGVVTLKTEPLQITTELPGRTVAYRIAEVRPQVSGIILKRNFVEGSDIEAGVSLYQIDPATYQATYDSAKGDLAKAQAAANIAELTVKRYQKLLGTQYISKQEYDQALADAQQATAAVVAAKAAVETARINLAYTKVTSPISGRIGKSSVTEGALVQNGQASALATVQQLDPIYVDVTQSSNDFLRLKQELANGSLKQENGKAKVDLVTSDGIKFPQSGTLEFSDVTVDQTTGSITLRAIFPNPDHTLLPGMFVRARLQEGTKPTALLVPQQGVTRTPRGDATVLVVGADNKVETRQIVASQAIGDKWLVTDGLKAGDRVVVSGLQKVRPGAQVKVQEITADNKQQAASGDQPAQPRS	MNKNRGFTPLAVVLMLSGSLALTGCDDKQAQQGGQQMPAVGVVTVKTEPLQITTELPGRTSAYRIAEVRPQVSGIILKRNFKEGSDIEAGVSLYQIDPATYQATYDSAKGDLAKAQAAANIAQLTVNRYQKLLGTQYISKQEYDQALADAQQANAAVTAAKAAVETARINLAYTKVTSPISGRIGKSNVTEGALVQNGQATALATVQQLDPIYVDVTQSSNDFLRLKQELANGTLKQENGKAKVSLITSDGIKFPQDGTLEFSDVTVDQTTGSITLRAIFPNPDHTLLPGMFVRARLEEGLNPNAILVPQQGVTRTPRGDATVLVVGADDKVETRPIVASQAIGDKWLVTEGLKAGDRVVISGLQKVRPGVQVKAQEVTADNNQQAASGAQPEQSKS	100	gnl|BL_ORD_ID|2319|hsp_num:0	2661			0	1191	tigecycline; tetracycline; rifampin; chloramphenicol; ampicillin; cefalotin; triclosan
	1_3233 # 3407846 # 3410995 # 1 # ID=1_3233;partial=00;start_type=ATG;rbs_motif=AGGAG;rbs_spacer=10bp;gc_cont=0.543	1_3233	3407846	3410995	+	Strict	1900	1902.5	acrB	94.66	3000216	protein homolog model	n/a	n/a	fluoroquinolone antibiotic; cephalosporin; glycylcycline; penam; tetracycline antibiotic; rifamycin antibiotic; phenicol antibiotic; disinfecting agents and antiseptics	antibiotic efflux	resistance-nodulation-cell division (RND) antibiotic efflux pump	ATGCCTAATTTCTTTATCGATCGCCCTATATTTGCGTGGGTGATCGCCATCATCATCATGTTGGCAGGGGGGCTCGCGATCCTCAAATTGCCGGTAGCGCAATATCCGACGATTGCGCCACCAGCAGTGACGATCTCCGCAACCTACCCTGGCGCTGATGCGAAAACGGTACAGGATACCGTCACGCAGGTTATCGAACAGAATATGAACGGTATCGATAACCTGATGTATATGTCCTCCAACAGTGACTCCACGGGGACCGTGCAGATCACGCTGACCTTTGAATCCGGCACCGATGCGGATATCGCGCAGGTTCAGGTTCAGAACAAGTTGCAACTGGCAATGCCTTTACTTCCCCAGGAAGTACAGCAACAGGGCGTGAGCGTTGAGAAGTCCTCA…	MPNFFIDRPIFAWVIAIIIMLAGGLAILKLPVAQYPTIAPPAVTISATYPGADAKTVQDTVTQVIEQNMNGIDNLMYMSSNSDSTGTVQITLTFESGTDADIAQVQVQNKLQLAMPLLPQEVQQQGVSVEKSSSSFLMVVGVINTDGTMTQEDISDYVAANMKDPISRTSGVGDVQLFGSQYAMRIWMNPTELTKYQLTPVDVINAIKAQNAQVAAGQLGGTPPVKGQQLNASIIAQTRLTSTDEFGKILLKVNQDGSQVRLRDVAKIELGGENYDVIAKFNGQPASGLGIKLATGANALDTATAIRAELKKMEPFFPPGMKIVYPYDTTPFVKISIHEVVKTLVEAIILVFLVMYLFLQNFRATLIPTIAVPVVLLGTFAVLAAFGFSINTLTMFGMV…	MPNFFIDRPIFAWVIAIIIMLAGGLAILKLPVAQYPTIAPPAVTISASYPGADAKTVQDTVTQVIEQNMNGIDNLMYMSSNSDSTGTVQITLTFESGTDADIAQVQVQNKLQLAMPLLPQEVQQQGVSVEKSSSSFLMVVGVINTDGTMTQEDISDYVAANMKDAISRTSGVGDVQLFGSQYAMRIWMNPNELNKFQLTPVDVITAIKAQNAQVAAGQLGGTPPVKGQQLNASIIAQTRLTSTEEFGKILLKVNQDGSRVLLRDVAKIELGGENYDIIAEFNGQPASGLGIKLATGANALDTAAAIRAELAKMEPFFPSGLKIVYPYDTTPFVKISIHEVVKTLVEAIILVFLVMYLFLQNFRATLIPTIAVPVVLLGTFAVLAAFGFSINTLTMFGMV…	100	gnl|BL_ORD_ID|1011|hsp_num:0	1104			0	3144	tigecycline; acriflavine; tetracycline; rifampin; chloramphenicol; ampicillin; cefalotin; triclosan
	1_3328 # 3505576 # 3506688 # 1 # ID=1_3328;partial=00;start_type=ATG;rbs_motif=None;rbs_spacer=None;gc_cont=0.517	1_3328	3505576	3506688	+	Strict	250	261.2	vanG	38.87	3002909	protein homolog model	n/a	n/a	glycopeptide antibiotic	antibiotic target alteration	glycopeptide resistance gene cluster; Van ligase	ATGGAATGGGTTTTTAAGATGGCGAAATTGCGGGTAGGAATAGTATTTGGCGGTAAGTCGGCGGAACATGAAGTGTCTTTGCAATCAGCGAAAAATATCGTTGATGCGATCGATAAAACCCGCTTCGACGTGGTGCTGTTAGGGATAGATAAGGCGGGACAATGGCATGTTAACGATGCGGAAAATTATTTGCAGAATGCAGACGATCCGGCACATATCGCGCTACGTCCTTCGGCAATCAGTCTGGCCCAGGTGCCTGGCAAACATCAACACCAATTGATTAACGCCCAGAACGGGCAGCCGCTACCGACGGTAGATGTTATTTTTCCTATCGTCCACGGTACGCTGGGCGAAGACGGCTCATTGCAGGGGATGCTGCGCGTCGCAAACTTACCGTTT…	MEWVFKMAKLRVGIVFGGKSAEHEVSLQSAKNIVDAIDKTRFDVVLLGIDKAGQWHVNDAENYLQNADDPAHIALRPSAISLAQVPGKHQHQLINAQNGQPLPTVDVIFPIVHGTLGEDGSLQGMLRVANLPFVGSDVLSSAACMDKDIAKRLLRDAGLNIAPFITLTRTNRHAFSFAEVESRLGLPLFVKPANQGSSVGVSKVANEAQYQQAVALAFEFDHKVVVEQGIKGREIECAVLGNDNPQASTCGEIVLNSEFYAYDTKYIDDNGAQVVVPAQLPSGVNDKIRAIAIQAYQTLGCAGMARVDVFLTADNEVVINEINTLPGFTNISMYPKLWQASGLGYTDLISRLIELALERHTANNALKTTM	MQNKKIAVIFGGNSTEYEVSLQSASAVFENINTNKFDIIPIGITRSGEWYHYTGEKEKILNNTWFEDSKNLCPVVVSQNRSVKGFLEIASDKYRIIKVDLVFPVLHGKNGEDGTLQGIFELAGIPVVGCDTLSSALCMDKDRAHKLVSLAGISVPKSVTFKRFNEEAAMKEIEANLTYPLFIKPVRAGSSFGITKVIEKQELDAAIELAFEHDTEVIVEETINGFEVGCAVLGIDELIVGRVDEIELSSGFFDYTEKYTLKSSKIYMPARIDAEAEKRIQEAAVTIYKALGCSGFSRVDMFYTPSGEIVFNEVNTIPGFTSHSRYPNMMKGIGLSFSQMLDKLIGLYVE	106.02	gnl|BL_ORD_ID|1069|hsp_num:0	1157			0	1047	vancomycin
	1_3354 # 3538984 # 3539448 # -1 # ID=1_3354;partial=00;start_type=ATG;rbs_motif=AGGAG;rbs_spacer=7bp;gc_cont=0.544	1_3354	3538984	3539448	-	Perfect	290	310.1	golS	100	3000504	protein homolog model	n/a	n/a	monobactam; carbapenem; cephalosporin; cephamycin; penam; phenicol antibiotic; penem	antibiotic efflux	resistance-nodulation-cell division (RND) antibiotic efflux pump	ATGAACATCGGTAAAGCAGCTAAAGCATCGAAAGTCTCGGCCAAAATGATTCGCTACTATGAACAGATTGGTCTGATTCCCGCGGCAAGTCGGACGGATTCCGGCTATCGGGCCTATACCCAGGCTGATGTTAATCAATTGCATTTTATACGCCGCGCGCGCGACCTCGGTTTTTCAGTTGCTGAAATCAGCGACTTACTGAATCTTTGGAATAACCAGTCGCGGCAAAGCGCTGACGTCAAACGCCTGGCGCAGACGCACATTGATGAACTGGACAGACGTATCCAGAACATGCAGCACATGGCGCAAACCCTCAAAGCGCTGATTCACTGCTGCGCCGGCGACGCGCTGCCAGATTGTCCCATTCTGCATACGCTTGGACAACCTGACGATAGCGAG…	MNIGKAAKASKVSAKMIRYYEQIGLIPAASRTDSGYRAYTQADVNQLHFIRRARDLGFSVAEISDLLNLWNNQSRQSADVKRLAQTHIDELDRRIQNMQHMAQTLKALIHCCAGDALPDCPILHTLGQPDDSEPEARTGAVLRRPRRHGLAKRL	MNIGKAAKASKVSAKMIRYYEQIGLIPAASRTDSGYRAYTQADVNQLHFIRRARDLGFSVAEISDLLNLWNNQSRQSADVKRLAQTHIDELDRRIQNMQHMAQTLKALIHCCAGDALPDCPILHTLGQPDDSEPEARTGAVLRRPRRHGLAKRL	100	gnl|BL_ORD_ID|36|hsp_num:0	44			0	462	chloramphenicol
	1_3357 # 3543248 # 3546415 # 1 # ID=1_3357;partial=00;start_type=ATG;rbs_motif=AGG;rbs_spacer=10bp;gc_cont=0.567	1_3357	3543248	3546415	+	Strict	750	1209.9	adeF	60.67	3000777	protein homolog model	n/a	n/a	fluoroquinolone antibiotic; tetracycline antibiotic	antibiotic efflux	resistance-nodulation-cell division (RND) antibiotic efflux pump	ATGAAATTCACCCACTTTTTCATTGCACGACCCATCTTCGCCATCGTCCTGTCGCTGTTAATGCTGCTGGCTGGCGCTATCGCCTTTTTAAAACTGCCGCTGAGTGAATATCCGGCCGTTACGCCGCCCACGGTACAGGTTAGCGCCAGCTACCCCGGCGCTAACCCGCAAGTGATTGCCGATACGGTAGCCGCGCCGCTGGAACAGGTGATCAACGGCGTTGACGGCATGTTGTATATGAATACCCAGATGGCCATTGATGGTCGCATGGTTATCTCTATCGCCTTCGAACAGGGAACCGATCCTGATATGGCGCAAATTCAGGTGCAAAACCGGGTATCCCGCGCGCTGCCTCGCCTGCCCGAAGAAGTCCAGCGAATTGGCGTTGTAACGGAGAAA…	MKFTHFFIARPIFAIVLSLLMLLAGAIAFLKLPLSEYPAVTPPTVQVSASYPGANPQVIADTVAAPLEQVINGVDGMLYMNTQMAIDGRMVISIAFEQGTDPDMAQIQVQNRVSRALPRLPEEVQRIGVVTEKTSPDMLMVVHLVSPQKRYDSLYLSNFAIRQVRDELARLPGVGDVLVWGAGEYAMRVWLDPAKIANRGLTASDIVTALREQNVQVAAGSVGQQPEASAAFQMTVNTLGRLTSEEQFGEIVVKIGADGEVTRLRDVARVTLGADAYTLRSLLNGEAAPALQIIQSPGANAIDVSNAIRGKMDELQQNFPQDIEYRIAYDPTVFVRASLQSVAITLLEALVLVVLVVVLFLQTWRASIIPLVAVPVSLVGTFALMHLFGFSLNTLSLFG…	MNISKFFIDRPIFAGVLSVLILLAGLLSVFQLPISEYPEVVPPSVVVRAQYPGANPKVIAETVASPLEESINGVEDMLYMQSQANSDGNLTITVNFKLGIDPDKAQQLVQNRVSQAMPRLPEDVQRLGVTTLKSSPTLTMVVHLTSPDNRYDMTYLRNYAVLNVKDRLARLQGVGEVGLFGSGDYAMRVWLDPQKVAQRNLTATEIVNAIREQNIQVAAGTIGASPSNSPLQLSVNAQGRLTTEQEFADIILKTAPDGAVTRLGDVARVELAASQYGLRSLLDNKQAVAIPIFQAPGANALQVSDQVRSTMKELSKDFPSSIKYDIVYDPTQFVRASIKAVVHTLLEAITLVVVVVILFLQTWRASIIPLLAVPVSIIGTFALMLAFGYSINALSLFGM…	99.62	gnl|BL_ORD_ID|133|hsp_num:0	153			0	3126	tetracycline
	1_3572 # 3784416 # 3785360 # -1 # ID=1_3572;partial=00;start_type=ATG;rbs_motif=GGAG;rbs_spacer=6bp;gc_cont=0.476	1_3572	3784416	3785360	-	Strict	500	562	leuO	86.62	3003843	protein homolog model	n/a	n/a	nucleoside antibiotic; disinfecting agents and antiseptics	antibiotic efflux	major facilitator superfamily (MFS) antibiotic efflux pump	ATGCCAGAGGTCAAAACCGAAAAGCCGCATCTTTTAGATATGGGCAAACCACAGCTTCGCATGGTTGATTTGAACCTATTGACCGTGTTCGATGCGGTAATGCAAGAGCAGAATATTACGCGCGCCGCCCACACGCTGGGAATGTCGCAGCCTGCGGTCAGTAACGCCGTAGCGCGTCTGAAGGTTATGTTTAATGACGAACTTTTTGTTCGATATGGACGAGGAATTCAGCCGACTGCCCGTGCATTTCAGTTATTTGGTTCAGTCCGTCAGGCGTTACAATTGGTGCAAAATGAATTGCCGGGATCGGGGTTTGAGCCGACCAGCAGCGAACGTGTATTCAATCTTTGCGTGTGCAGTCCGCTGGATAATATCCTGACGTCACAGATTTATAATCGT…	MPEVKTEKPHLLDMGKPQLRMVDLNLLTVFDAVMQEQNITRAAHTLGMSQPAVSNAVARLKVMFNDELFVRYGRGIQPTARAFQLFGSVRQALQLVQNELPGSGFEPTSSERVFNLCVCSPLDNILTSQIYNRVEKIAPNIHVVFKASLNQNTEHQLRYQETEFVISYEEFRRPEFTSVPLFKDEMVLVASRKHPRISGPLLEGDVYNEQHAVVSLDRYASFSQPWYDTPDKQSSVAYQGMVLISVLNVVSQTHLVAIAPRWLAEEFAESLDLQILPLPLKLNSRTCYLSWHEAAGRDKGHQWMEDLLVSVCKR	MPEVQTDHPETAELSKPQLRMVDLNLLTVFDAVMQEQNITRAAHALGMSQPAVSNAVARLKVMFNDELFVRYGRGIQPTARAFQLFGSVRQALQLVQNELPGSGFEPASSERVFHLCVCSPLDSILTSQIYNHIEQIAPNIHVMFKSSLNQNTEHQLRYQETEFVISYEDFHRPEFTSVPLFKDEMVLVASKNHPTIKGPLLKHDVYNEQHAAVSLDRFASFSQTWYDTVDKQASIAYQGMAMMSVLSVVSQTHLVAIAPRWLAEEFAESLELQVLPLPLKQNSRTCYLSWHEAAGRDKGHQWMEEQLVSICKR	100	gnl|BL_ORD_ID|4919|hsp_num:0	5921			0	942	acriflavine; puromycin
	3_11 # 7019 # 7879 # -1 # ID=3_11;partial=00;start_type=ATG;rbs_motif=AGGA;rbs_spacer=5bp;gc_cont=0.490	3_11	7019	7879	-	Perfect	500	571.2	TEM-135	100	3000999	protein homolog model	n/a	n/a	monobactam; cephalosporin; penam; penem	antibiotic inactivation	TEM beta-lactamase	ATGAGTATTCAACATTTTCGTGTCGCCCTTATTCCCTTTTTTGCGGCATTTTGCCTTCCTGTTTTTGCTCACCCAGAAACGCTGGTGAAAGTAAAAGATGCTGAAGATCAGTTGGGTGCACGAGTGGGTTACATCGAACTGGATCTCAACAGCGGTAAGATCCTTGAGAGTTTTCGCCCCGAAGAACGTTTTCCAATGATGAGCACTTTTAAAGTTCTGCTATGTGGTGCGGTATTATCCCGTGTTGACGCCGGGCAAGAGCAACTCGGTCGCCGCATACACTATTCTCAGAATGACTTGGTTGAGTACTCACCAGTCACAGAAAAGCATCTTACGGATGGCATGACAGTAAGAGAATTATGCAGTGCTGCCATAACCATGAGTGATAACACTGCTGCC…	MSIQHFRVALIPFFAAFCLPVFAHPETLVKVKDAEDQLGARVGYIELDLNSGKILESFRPEERFPMMSTFKVLLCGAVLSRVDAGQEQLGRRIHYSQNDLVEYSPVTEKHLTDGMTVRELCSAAITMSDNTAANLLLTTIGGPKELTAFLHNMGDHVTRLDRWEPELNEAIPNDERDTTTPAAMATTLRKLLTGELLTLASRQQLIDWMEADKVAGPLLRSALPAGWFIADKSGAGERGSRGIIAALGPDGKPSRIVVIYTTGSQATMDERNRQIAEIGASLIKHW	MSIQHFRVALIPFFAAFCLPVFAHPETLVKVKDAEDQLGARVGYIELDLNSGKILESFRPEERFPMMSTFKVLLCGAVLSRVDAGQEQLGRRIHYSQNDLVEYSPVTEKHLTDGMTVRELCSAAITMSDNTAANLLLTTIGGPKELTAFLHNMGDHVTRLDRWEPELNEAIPNDERDTTTPAAMATTLRKLLTGELLTLASRQQLIDWMEADKVAGPLLRSALPAGWFIADKSGAGERGSRGIIAALGPDGKPSRIVVIYTTGSQATMDERNRQIAEIGASLIKHW	100	gnl|BL_ORD_ID|1558|hsp_num:0	1697			0	858	penicillin; ampicillin
	1_54 # 57532 # 58923 # 1 # ID=1_54;partial=00;start_type=ATG;rbs_motif=AGGAG;rbs_spacer=6bp;gc_cont=0.552	1_54	57532	58923	+	Strict	850	867.1	Escherichia coli UhpT with mutation conferring resistance to fosfomycin	95.68	3003890	protein variant model	E350Q	n/a	phosphonic acid antibiotic	antibiotic target alteration	antibiotic-resistant UhpT	ATGCTGGCCTTCTTAAACCAGGTGCGCAAGCCGACCCTGGATCTGCCGCTCGATGTGCGGCGTAAAATGTGGTTCAAGCCGTTCATGCAGTCCTATCTGGTGGTTTTTATCGGCTACCTGACCATGTACCTGATCCGCAAAAACTTTAACATCGCGCAGAACGACATGATTTCTACCTACGGGTTGAGCATGACCGAGCTGGGGATGATTGGCCTGGGCTTCTCGATCACCTACGGCGTGGGGAAAACGCTGGTTTCCTACTACGCTGACGGTAAAAATACCAAGCAGTTTCTACCGTTTATGTTGATCCTCTCCGCTATCTGTATGCTCGGCTTCAGCGCCAGCATGGGCGCGGGGTCAACCAGTCTGTTTCTGATGATCGCTTTCTATGCCCTGAGC…	MLAFLNQVRKPTLDLPLDVRRKMWFKPFMQSYLVVFIGYLTMYLIRKNFNIAQNDMISTYGLSMTELGMIGLGFSITYGVGKTLVSYYADGKNTKQFLPFMLILSAICMLGFSASMGAGSTSLFLMIAFYALSGFFQSTGGSCSYSTITKWTPRRKRGTFLGFWNISHNLGGAGAAGVALFGANYLFDGHVIGMFIFPSIIALIVGFIGLRFGSDSPESYGLGKAEELFGEEISEEDKETEENEMTKWQIFVEYVLKNKVIWLLCFSNIFLYVVRIGIDQWSTVYAFQELKLSKEVAIQGFTLFEVGALVGTLLWGWLSDLANGRRALVACVALALIIATLGVYQHASNQYVYLASLFALGFLVFGPQLLIGVAAVGFVPKKAIGAADGIKGTFAYLIG…	MLAFLNQVRKPTLDLPLEVRRKMWFKPFMQSYLVVFIGYLTMYLIRKNFNIAQNDMISTYGLSMTQLGMIGLGFSITYGVGKTLVSYYADGKNTKQFLPFMLILSAICMLGFSASMGSGSVSLFLMIAFYALSGFFQSTGGSCSYSTITKWTPRRKRGTFLGFWNISHNLGGAGAAGVALFGANYLFDGHVIGMFIFPSIIALIVGFIGLRYGSDSPESYGLGKAEELFGEEISEEDKETESTDMTKWQIFVEYVLKNKVIWLLCFANIFLYVVRIGIDQWSTVYAFQELKLSKAVAIQGFTLFEAGALVGTLLWGWLSDLANGRRGLVACIALALIIATLGVYQHASNEYIYLASLFALGFLVFGPQLLIGVAAVGFVPKKAIGAADGIKGTFAYLIG…	100	gnl|BL_ORD_ID|2126|hsp_num:0	2373			0	1389	fosfomycin
	1_390 # 438579 # 439763 # 1 # ID=1_390;partial=00;start_type=GTG;rbs_motif=AGGA;rbs_spacer=8bp;gc_cont=0.542	1_390	438579	439763	+	Strict	700	786.9	Escherichia coli EF-Tu mutants conferring resistance to Pulvomycin	99.49	3003369	protein variant model	R234F	n/a	elfamycin antibiotic	antibiotic target alteration	elfamycin resistant EF-Tu	GTGTCTAAAGAAAAATTTGAACGTACAAAACCGCACGTTAACGTCGGCACCATCGGCCACGTTGACCACGGTAAAACTACCCTGACCGCTGCAATCACCACCGTACTGGCTAAAACCTACGGCGGTGCTGCTCGTGCATTCGACCAGATCGATAACGCGCCGGAAGAAAAAGCGCGTGGTATCACCATCAACACTTCTCACGTTGAATACGATACCCCGACCCGCCACTACGCACACGTAGACTGCCCGGGGCACGCCGACTATGTTAAAAACATGATCACCGGTGCTGCTCAGATGGACGGCGCGATTCTGGTTGTTGCTGCGACTGACGGCCCGATGCCGCAGACCCGTGAGCACATCCTGCTGGGTCGTCAGGTAGGCGTTCCGTACATCATCGTG…	MSKEKFERTKPHVNVGTIGHVDHGKTTLTAAITTVLAKTYGGAARAFDQIDNAPEEKARGITINTSHVEYDTPTRHYAHVDCPGHADYVKNMITGAAQMDGAILVVAATDGPMPQTREHILLGRQVGVPYIIVFLNKCDMVDDEELLELVEMEVRELLSQYDFPGDDTPIVRGSALKALEGDAEWEAKIIELAGFLDSYIPEPERAIDKPFLLPIEDVFSISGRGTVVTGRVERGIIKVGEEVEIVGIKETQKSTCTGVEMFRKLLDEGRAGENVGVLLRGIKREEIERGQVLAKPGTIKPHTKFESEVYILSKDEGGRHTPFFKGYRPQFYFRTTDVTGTIELPEGVEMVMPGDNIKMVVTLIHPIAMDDGLRFAIREGGRTVGAGVVAKVLG	MLSPEGESTIVRNIAVSKEKFERTKPHVNVGTIGHVDHGKTTLTAAITTVLAKTYGGAARAFDQIDNAPEEKARGITINTSHVEYDTPTRHYAHVDCPGHADYVKNMITGAAQMDGAILVVAATDGPMPQTREHILLGRQVGVPYIIVFLNKCDMVDDEELLELVEMEVRELLSQYDFPGDDTPIVRGSALKALEGDAEWEAKILELAGFLDSYIPEPERAIDKPFLLPIEDVFSISGRGTVVTGRVERGIIKVGEEVEIVGIKETQKSTCTGVEMFRKLLDEGRAGENVGVLLRGIKREEIERGQVLAKPGTIKPHTKFESEVYILSKDEGGRHTPFFKGYRPQFYFRTTDVTGTIELPEGVEMVMPGDNIKMVVTLIHPIAMDDGLRFAIREGGRTV…	96.33	gnl|BL_ORD_ID|1969|hsp_num:0	2158			45	1227	pulvomycin
	1_1411 # 1535600 # 1536958 # 1 # ID=1_1411;partial=00;start_type=ATG;rbs_motif=GGAG;rbs_spacer=8bp;gc_cont=0.548	1_1411	1535600	1536958	+	Strict	850	898.7	Escherichia coli GlpT with mutation conferring resistance to fosfomycin	96.9	3003889	protein variant model	E448K	n/a	phosphonic acid antibiotic	antibiotic target alteration	antibiotic-resistant GlpT	ATGTTGAGTATTTTTAAACCAGCGCCGCATAAAGCGCGCTTGCCAGCGGCGGAGATTGATCCGACCTATCGCCGATTACGCTGGCAGATTTTCCTGGGGATATTCTTTGGCTATGCCGCGTATTATCTGGTGCGCAAGAACTTTGCCCTCGCGATGCCCTACCTGGTAGAACAGGGTTTTTCACGCGGCGATCTGGGCTTTGCGTTGTCCGGGATTTCCATCGCTTATGGTTTTTCGAAATTTATAATGGGTTCGGTGTCCGATCGCTCGAATCCGCGCGTTTTTCTGCCGGCAGGGTTGATTCTGGCCGCAGCAGTCATGTTGTTTATGGGCTTTGTGCCGTGGGCGACATCCAGCATCGCCGTGATGTTTGTGCTGTTGTTCCTTTGCGGCTGGTTC…	MLSIFKPAPHKARLPAAEIDPTYRRLRWQIFLGIFFGYAAYYLVRKNFALAMPYLVEQGFSRGDLGFALSGISIAYGFSKFIMGSVSDRSNPRVFLPAGLILAAAVMLFMGFVPWATSSIAVMFVLLFLCGWFQGMGWPPCGRTMVHWWSQKERGGIVSVWNCAHNVGGGIPPLLFLLGMAWFNDWKAALYMPAFGAIVVALFAFAMMRDTPQSCGLPPIEEYKNDYPDDYNEKAEEELTAKQIFMQYVLPNKLLWYIAIANVFVYLLRYGILDWSPTYLKEVKHFALDKSSWAYFLYEYAGIPGTLLCGWMSDKVFRGNRGATGVFFMTLVTIATIVYWMNPAGNPNVDMACMIIIGFLIYGPVMLIGLHALELAPKKAAGTAAGFTGLFGYLGGSVA…	MLSIFKPAPHKARLPAAEIDPTYRRLRWQIFLGIFFGYAAYYLVRKNFALAMPYLVEQGFSRGDLGFALSGISIAYGFSKFIMGSVSDRSNPRVFLPAGLILAAAVMLFMGFVPWATSSIAVMFVLLFLCGWFQGMGWPPCGRTMVHWWSQKERGGIVSVWNCAHNVGGGIPPLLFLLGMAWFNDWHAALYMPAFCAILVALFAFAMMRDTPQSCGLPPIEEYKNDYPDDYNEKAEQELTAKQIFMQYVLPNKLLWYIAIANVFVYLLRYGILDWSPTYLKEVKHFALDKSSWAYFLYEYAGIPGTLLCGWMSDKVFRGNRGATGVFFMTLVTIATIVYWMNPAGNPTVDMICMIVIGFLIYGPVMLIGLHALELAPKKAAGTAAGFTGLFGYLGGSVA…	100	gnl|BL_ORD_ID|2127|hsp_num:0	2372			0	1356	fosfomycin
	1_1422 # 1549216 # 1551852 # 1 # ID=1_1422;partial=00;start_type=ATG;rbs_motif=GGA;rbs_spacer=10bp;gc_cont=0.559	1_1422	1549216	1551852	+	Strict	1500	1679.5	Salmonella enterica gyrA conferring resistance to fluoroquinolones	99.89	3003926	protein variant model	D87Y	D87Y:1545	fluoroquinolone antibiotic	antibiotic target alteration	fluoroquinolone resistant gyrA	ATGAGCGACCTTGCGAGAGAAATTACACCGGTCAACATTGAGGAAGAGCTGAAAAGCTCCTATCTGGATTATGCGATGTCGGTCATTGTTGGCCGTGCGCTGCCGGATGTCCGAGATGGCCTGAAGCCGGTACACCGTCGCGTACTTTACGCCATGAACGTATTGGGCAATGACTGGAACAAAGCCTATAAAAAATCTGCCCGTGTCGTTGGTGACGTAATCGGTAAATACCATCCCCACGGCGATTCCGCAGTGTATTACACCATCGTTCGTATGGCGCAGCCATTCTCGCTGCGTTACATGCTGGTGGATGGTCAGGGTAACTTCGGTTCTATTGACGGCGACTCCGCGGCGGCAATGCGTTATACGGAGATCCGTCTGGCGAAAATCGCCCACGAA…	MSDLAREITPVNIEEELKSSYLDYAMSVIVGRALPDVRDGLKPVHRRVLYAMNVLGNDWNKAYKKSARVVGDVIGKYHPHGDSAVYYTIVRMAQPFSLRYMLVDGQGNFGSIDGDSAAAMRYTEIRLAKIAHELMADLEKETVDFVDNYDGTEKIPDVMPTKIPNLLVNGSSGIAVGMATNIPPHNLTEVINGCLAYIDNEDISIEGLMEHIPGPDFPTAAIINGRRGIEEAYRTGRGKVYIRARAEVEADAKTGRETIIVHEIPYQVNKARLIEKIAELVKDKRVEGISALRDESDKDGMRIVIEVKRDAVGEVVLNNLYSQTQLQVSFGINMVALHHGQPKIMNLKDIISAFVRHRREVVTRRTIFELRKARDRAHILEALAIALANIDPIIELIRR…	MSDLAREITPVNIEEELKSSYLDYAMSVIVGRALPDVRDGLKPVHRRVLYAMNVLGNDWNKAYKKSARVVGDVIGKYHPHGDSAVYDTIVRMAQPFSLRYMLVDGQGNFGSIDGDSAAAMRYTEIRLAKIAHELMADLEKETVDFVDNYDGTEKIPDVMPTKIPNLLVNGSSGIAVGMATNIPPHNLTEVINGCLAYIDNEDISIEGLMEHIPGPDFPTAAIINGRRGIEEAYRTGRGKVYIRARAEVEADAKTGRETIIVHEIPYQVNKARLIEKIAELVKDKRVEGISALRDESDKDGMRIVIEVKRDAVGEVVLNNLYSQTQLQVSFGINMVALHHGQPKIMNLKDIISAFVRHRREVVTRRTIFELRKARDRAHILEALAIALANIDPIIELIRR…	100	gnl|BL_ORD_ID|2156|hsp_num:0	2403			0	2634	ciprofloxacin; nalidixic acid
	1_3565 # 3776437 # 3778203 # -1 # ID=1_3565;partial=00;start_type=ATG;rbs_motif=AGGA;rbs_spacer=12bp;gc_cont=0.547	1_3565	3776437	3778203	-	Strict	500	564.7	Haemophilus influenzae PBP3 conferring resistance to beta-lactam antibiotics	51.85	3004446	protein variant model	D350N, S357N	n/a	cephalosporin; cephamycin; penam	antibiotic target alteration	Penicillin-binding protein mutations conferring resistance to beta-lactam antibiotics	ATGAAAGCAGCGGCAAAAACGCAAAAATCGAAACGCCAGGAAGAACAGACCAACTTCATCAGTTGGCGTTTTGCGTTGCTGTGCGGCTGTATTTTACTGGCGCTGGTTTTTTTACTTGGACGCGCGGCGTGGCTACAGATTATCGCCCCGGATATGCTGGTGCGTCAGGGCGATATGCGTTCGCTGCGTGTTCAGGAAGTCTCCACCTCACGCGGTATGATTACCGACCGTTCCGGGCGTCCACTGGCGGTCAGCGTACCGGTTAAGGCGATCTGGGCCGACCCGAAAGAAGTTCATGACGCCGGCGGCATCAGCGTTGGCGATCGCTGGAAAGCGCTTTCTACTGCGCTCAATATTCCGCTCGATCAGCTCTCCGCCCGTATCAACGCCAACCCGAAA…	MKAAAKTQKSKRQEEQTNFISWRFALLCGCILLALVFLLGRAAWLQIIAPDMLVRQGDMRSLRVQEVSTSRGMITDRSGRPLAVSVPVKAIWADPKEVHDAGGISVGDRWKALSTALNIPLDQLSARINANPKGRFIYLARQVNPDMADYIKKLKLPGIHLREESRRYYPSGEVTAHLIGFTNVDSQGIEGVEKSFDKWLTGQPGERIVRKDRYGRVIEDISSTDSQAAHNLALSIDERLQALVYRELNNAVAFNKAESGSAVLVDVNTGEVLAMANSPSYNPNNLAGTPKDAMRNRTITDVFEPGSTVKPMVVMTALQRGIVNENTVLNTVPYRINGHEIKDVARYSELTLTGVLQKSSNVGVSKLALAMPSSALVDTYSRFGLGKATNLGLVGERSG…	MVKFNSSRKSGKSKKTIRKLTAPETVKQNKPQKVFEKCFMRGRYMLSTVLILLGLCALVARAAYVQSINADTLSNEADKRSLRKDEVLSVRGSILDRNGQLLSVSVPMSAIVADPKTMLKENSLADKERIAALAEELGMTENDLVKKIEKNSKSGYLYLARQVELSKANYIRRLKIKGIILETEHRRFYPRVEEAAHVVGYTDIDGNGIEGIEKSFNSLLVGKDGSRTVRKDKRGNIVAHISDEKKYDAQDVTLSIDEKLQSMVYREIKKAVSENNAESGTAVLVDVRTGEVLAMATAPSYNPNNRVGVKSELMRNRAITDTFEPGSTVKPFVVLTALQRGVVKRDEIIDTTSFKLSGKEIVDVAPRAQQTLDEILMNSSNRGVSRLALRMPPSALMET…	96.39	gnl|BL_ORD_ID|2491|hsp_num:0	2886			63	1758	ceftriaxone; ampicillin; cefaclor; cefotaxime; cefditoren; cefdinir
	1_4096 # 4371328 # 4372512 # -1 # ID=1_4096;partial=00;start_type=ATG;rbs_motif=GAGG;rbs_spacer=8bp;gc_cont=0.540	1_4096	4371328	4372512	-	Strict	700	786.9	Escherichia coli EF-Tu mutants conferring resistance to Pulvomycin	99.49	3003369	protein variant model	R234F	n/a	elfamycin antibiotic	antibiotic target alteration	elfamycin resistant EF-Tu	ATGTCTAAAGAAAAGTTTGAACGTACAAAACCGCACGTTAACGTCGGTACTATCGGCCACGTTGACCATGGTAAAACAACGCTGACCGCTGCCATTACTACCGTACTGGCTAAAACCTACGGCGGTGCCGCCCGCGCATTCGACCAGATCGATAACGCGCCGGAAGAAAAAGCGCGTGGTATCACCATCAACACTTCTCACGTTGAATACGATACCCCGACCCGCCACTACGCACACGTAGACTGCCCGGGGCACGCCGACTATGTTAAAAACATGATCACCGGTGCTGCTCAGATGGACGGCGCGATTCTGGTTGTTGCTGCGACTGACGGCCCGATGCCGCAGACCCGTGAGCACATCCTGCTGGGTCGTCAGGTAGGCGTTCCGTACATCATCGTG…	MSKEKFERTKPHVNVGTIGHVDHGKTTLTAAITTVLAKTYGGAARAFDQIDNAPEEKARGITINTSHVEYDTPTRHYAHVDCPGHADYVKNMITGAAQMDGAILVVAATDGPMPQTREHILLGRQVGVPYIIVFLNKCDMVDDEELLELVEMEVRELLSQYDFPGDDTPIVRGSALKALEGDAEWEAKIIELAGFLDSYIPEPERAIDKPFLLPIEDVFSISGRGTVVTGRVERGIIKVGEEVEIVGIKETQKSTCTGVEMFRKLLDEGRAGENVGVLLRGIKREEIERGQVLAKPGTIKPHTKFESEVYILSKDEGGRHTPFFKGYRPQFYFRTTDVTGTIELPEGVEMVMPGDNIKMVVTLIHPIAMDDGLRFAIREGGRTVGAGVVAKVLG	MLSPEGESTIVRNIAVSKEKFERTKPHVNVGTIGHVDHGKTTLTAAITTVLAKTYGGAARAFDQIDNAPEEKARGITINTSHVEYDTPTRHYAHVDCPGHADYVKNMITGAAQMDGAILVVAATDGPMPQTREHILLGRQVGVPYIIVFLNKCDMVDDEELLELVEMEVRELLSQYDFPGDDTPIVRGSALKALEGDAEWEAKILELAGFLDSYIPEPERAIDKPFLLPIEDVFSISGRGTVVTGRVERGIIKVGEEVEIVGIKETQKSTCTGVEMFRKLLDEGRAGENVGVLLRGIKREEIERGQVLAKPGTIKPHTKFESEVYILSKDEGGRHTPFFKGYRPQFYFRTTDVTGTIELPEGVEMVMPGDNIKMVVTLIHPIAMDDGLRFAIREGGRTV…	96.33	gnl|BL_ORD_ID|1969|hsp_num:0	2158			45	1227	pulvomycin
	1_1549 # 1689763 # 1690485 # -1 # ID=1_1549;partial=00;start_type=ATG;rbs_motif=GAG;rbs_spacer=6bp;gc_cont=0.537	1_1549	1689763	1690485	-	Strict	450	456.8	baeR	94.14	3000828	protein overexpression model	n/a	n/a	aminoglycoside antibiotic; aminocoumarin antibiotic	antibiotic efflux	resistance-nodulation-cell division (RND) antibiotic efflux pump	ATGACTGAATTACCCATTGATGAAAACACGCCGCGCATTTTGATTGTTGAAGATGAACCCAAGCTGGGTCAGCTGCTTATTGACTACTTACGCGCGGCGAGTTACGCCCCCACGCTCATCAATCACGGCGACAAGGTACTGCCGTATGTGCGTCAAACGCCGCCGGATCTGATTCTGCTGGATCTGATGCTGCCGGGTACCGATGGTCTGACGCTATGCCGGGAGATTCGCCGTTTTTCCGACATCCCCATTGTGATGGTCACAGCCAAAATTGAAGAGATCGACCGGCTGCTGGGGCTGGAAATCGGCGCCGATGATTATATCTGTAAGCCTTACAGCCCGCGCGAAGTCGTGGCCCGCGTGAAAACCATTTTGCGCCGCTGTAAACCGCAGCGCGAA…	MTELPIDENTPRILIVEDEPKLGQLLIDYLRAASYAPTLINHGDKVLPYVRQTPPDLILLDLMLPGTDGLTLCREIRRFSDIPIVMVTAKIEEIDRLLGLEIGADDYICKPYSPREVVARVKTILRRCKPQRELQQQDAESPLMIDESRFQASWCGKALDLTPAEFRLLKTLSLEPGKVFSREQLLNHLYDDYRVVTDRTIDSHIKNLRRKLESLDAEQSFIRAVYGVGYRWEADACRLV	MTELPIDENTPRILIVEDEPKLGQLLIDYLRAASYAPSLISHGDQVLPYVRQTPPDLILLDLMLPGTDGLTLCREIRRFSDVPIVMVTAKIEEIDRLLGLEIGADDYICKPYSPREVVARVKTILRRCKPQRELQVLDAESPLIVDESRFQASWRSKLLDLTPAEFRLLKTLSHEPGKVFSREQLLNHLYDDYRVVTDRTIDSHIKNLRRKLEALDAEQSFIRAVYGVGYRWEADACRIA	100	gnl|BL_ORD_ID|1382|hsp_num:0	1337			0	717	neomycin; amikacin; kanamycin A; tobramycin; novobiocin; gentamicin
	1_2150 # 2287823 # 2288257 # -1 # ID=1_2150;partial=00;start_type=TTG;rbs_motif=None;rbs_spacer=None;gc_cont=0.474	1_2150	2287823	2288257	-	Strict	210	273.5	Escherichia coli AcrAB-TolC with MarR mutations conferring resistance to ciprofloxacin and tetracycline	92.36	3003378	protein overexpression model	n/a	n/a	fluoroquinolone antibiotic; cephalosporin; glycylcycline; penam; tetracycline antibiotic; rifamycin antibiotic; phenicol antibiotic; disinfecting agents and antiseptics	antibiotic target alteration; antibiotic efflux	resistance-nodulation-cell division (RND) antibiotic efflux pump	TTGAAAAGCACCAGTGATCTGTTCAATGAAATCATTCCGCTGGGTCGCTTGATCTACATGGTAAATCAAAAAAAAGATCGCCTGTTAAATAACTATTTATCCCCGCTGGATATCACCGCAACACAGTTTAAAGTGCTTTGCTCGATACGCTGCGCGGGATGTATTACCCCGGTTGAACTTAAAAAAGTGCTGTCTGTCGATCTCGGCGCATTGACGCGAATGCTCGACCGCCTGCTGTGCAAAGGCTGGATCGAAAGACTGCCGAATCCTAATGACAAACGCGGCGTACTGGTGAAGCTAACGCCGGACGGCGCGGCAATTTGTGAGCAATGTCATCAACGACCAGGGCAAGACCTGCATCAGGAATTAACAAAAAACTTAACGGCGGACGAAGTGGCA…	LKSTSDLFNEIIPLGRLIYMVNQKKDRLLNNYLSPLDITATQFKVLCSIRCAGCITPVELKKVLSVDLGALTRMLDRLLCKGWIERLPNPNDKRGVLVKLTPDGAAICEQCHQRPGQDLHQELTKNLTADEVATLEYLLKKILP	MKSTSDLFNEIIPLGRLIHMVNQKKDRLLNEYLSPLDITAAQFKVLCSIRCAACITPVELKKVLSVDLGALTRMLDRLVCKGWVERLPNPNDKRGVLVKLTTGGAAICEQCHQLVGQDLHQELTKNLTADEVATLEYLLKKVLP	100	gnl|BL_ORD_ID|1983|hsp_num:0	431			0	432	tigecycline; ciprofloxacin; tetracycline; rifampin; chloramphenicol; ampicillin; cefalotin; triclosan
	1_4000 # 4243160 # 4243618 # -1 # ID=1_4000;partial=00;start_type=ATG;rbs_motif=AGG;rbs_spacer=11bp;gc_cont=0.549	1_4000	4243160	4243618	-	Strict	300	300.4	Escherichia coli soxR with mutation conferring antibiotic resistance	96.05	3003381	protein overexpression model	n/a	n/a	fluoroquinolone antibiotic; cephalosporin; glycylcycline; penam; tetracycline antibiotic; rifamycin antibiotic; phenicol antibiotic; disinfecting agents and antiseptics	antibiotic target alteration; antibiotic efflux	ATP-binding cassette (ABC) antibiotic efflux pump; major facilitator superfamily (MFS) antibiotic efflux pump; resistance-nodulation-cell division (RND) antibiotic efflux pump	ATGGAAAAAAAATCTCCCCGTTTAAAAGCCTTACTGACGCCGGGGGAAGTTGCGAAACGTAGCGGTGTTGCTGTGTCCGCCCTGCACTTCTATGAAAGCAAAGGGCTAATTACCAGTATCCGTAATAGCGGTAACCAACGGCGATACAAGCGTGACGTGTTGCGTTATGTCGCGATTATCAAGATCGCCCAGCGTATCGGCATCCCGCTGGCAACTATCGGCGACGCGTTTGGTATCTTGCCGGAAGGACATACGTTAAGCGCGAAAGAGTGGAAGCAGCTCTCCTCGCAGTGGCGCGAAGAGTTAGACCGACGTATTCATACGCTGGTGGCGTTGCGCGATGAGCTGGACGGTTGTATCGGCTGCGGCTGTTTATCGCGTAGCGACTGTCCGCTGCGA…	MEKKSPRLKALLTPGEVAKRSGVAVSALHFYESKGLITSIRNSGNQRRYKRDVLRYVAIIKIAQRIGIPLATIGDAFGILPEGHTLSAKEWKQLSSQWREELDRRIHTLVALRDELDGCIGCGCLSRSDCPLRNPGDRLGEHGTGARLLEDD	MEKKLPRIKALLTPGEVAKRSGVAVSALHFYESKGLITSIRNSGNQRRYKRDVLRYVAIIKIAQRIGIPLATIGEAFGVLPEGHTLSAKEWKQLSSQWREELDRRIHTLVALRDELDGCIGCGCLSRSDCPLRNPGDRLGEEGTGARLLEDEQN	98.7	gnl|BL_ORD_ID|1972|hsp_num:0	1005			0	456	tigecycline; ciprofloxacin; tetracycline; rifampin; chloramphenicol; ampicillin; nalidixic acid; norfloxacin; cefalotin; triclosan
	1_4001 # 4243705 # 4244028 # 1 # ID=1_4001;partial=00;start_type=ATG;rbs_motif=GAGG;rbs_spacer=7bp;gc_cont=0.515	1_4001	4243705	4244028	+	Strict	200	209.1	Escherichia coli soxS with mutation conferring antibiotic resistance	95.33	3003511	protein overexpression model	n/a	n/a	fluoroquinolone antibiotic; monobactam; carbapenem; cephalosporin; glycylcycline; cephamycin; penam; tetracycline antibiotic; rifamycin antibiotic; phenicol antibiotic; penem; disinfecting agents and antiseptics	antibiotic target alteration; antibiotic efflux; reduced permeability to antibiotic	ATP-binding cassette (ABC) antibiotic efflux pump; major facilitator superfamily (MFS) antibiotic efflux pump; resistance-nodulation-cell division (RND) antibiotic efflux pump; General Bacterial Porin with reduced permeability to beta-lactams	ATGTCGCATCAGCAGATAATTCAGACCCTTATCGAATGGATTGATGAACATATCGACCAACCGCTAAACATTGATGTGGTGGCAAAAAAATCGGGCTACTCCAAGTGGTATTTGCAGCGGATGTTTCGTACGGTAACGCATCAAACATTAGGCGAGTATATTCGCCAGCGCCGTCTCCTGTTGGCGGCCGTTGAGCTACGAACGACCGAGCGCCCGATTTTTGATATCGCGATGGACCTGGGCTATGTATCGCAGCAAACCTTCTCGCGTGTATTCCGCCGCGAGTTCGATCGCACTCCCAGCGATTACCGTCACCGCCTGTAG	MSHQQIIQTLIEWIDEHIDQPLNIDVVAKKSGYSKWYLQRMFRTVTHQTLGEYIRQRRLLLAAVELRTTERPIFDIAMDLGYVSQQTFSRVFRREFDRTPSDYRHRL	MSHQKIIQDLIAWIDEHIDQPLNIDVVAKKSGYSKWYLQRMFRTVTHQTLGDYIRQRRLLLAAVELRTTERPIFDIAMDLGYVSQQTFSRVFRRQFDRTPSDYRHRL	100	gnl|BL_ORD_ID|1974|hsp_num:0	2066			0	321	tigecycline; ciprofloxacin; tetracycline; rifampin; chloramphenicol; ampicillin; norfloxacin; cefalotin; triclosan; enrofloxacin

## Sheet: ID_SA616
Isolate ID	ORF_ID	Contig	Start	Stop	Orientation	Cut_Off	Pass_Bitscore	Best_Hit_Bitscore	Best_Hit_ARO	Best_Identities	ARO	Model_type	SNPs_in_Best_Hit_ARO	Other_SNPs	Drug Class	Resistance Mechanism	AMR Gene Family	Predicted_DNA	Predicted_Protein	CARD_Protein_Sequence	Percentage Length of Reference Sequence	ID	Model_ID	Nudged	Note	Hit_Start	Hit_End	Antibiotic
SA616	1_369 # 421789 # 422421 # -1 # ID=1_369;partial=00;start_type=ATG;rbs_motif=AGGA;rbs_spacer=9bp;gc_cont=0.506	1_369	421789	422421	-	Strict	400	418.3	CRP	99.05	3000518	protein homolog model	n/a	n/a	macrolide antibiotic; fluoroquinolone antibiotic; penam	antibiotic efflux	resistance-nodulation-cell division (RND) antibiotic efflux pump	ATGGTGCTTGGCAAACCGCAAACAGACCCGACTCTTGAATGGTTCTTGTCTCATTGCCACATTCATAAGTACCCGTCAAAGAGCACGCTGATTCACCAGGGTGAAAAAGCAGAAACGCTGTACTACATCGTTAAAGGCTCCGTGGCAGTGCTGATCAAAGATGAAGAAGGGAAAGAAATGATCCTTTCTTATCTGAATCAGGGTGATTTTATTGGTGAACTGGGCCTGTTTGAAGAAGGCCAGGAACGCAGCGCCTGGGTACGTGCGAAAACCGCATGTGAGGTCGCTGAAATTTCCTACAAAAAATTTCGCCAATTAATCCAGGTCAACCCGGATATTCTGATGCGCCTCTCTTCCCAGATGGCTCGTCGCTTACAAGTCACCTCTGAAAAAGTAGGT…	MVLGKPQTDPTLEWFLSHCHIHKYPSKSTLIHQGEKAETLYYIVKGSVAVLIKDEEGKEMILSYLNQGDFIGELGLFEEGQERSAWVRAKTACEVAEISYKKFRQLIQVNPDILMRLSSQMARRLQVTSEKVGNLAFLDVTGRIAQTLLNLAKQPDAMTHPDGMQIKITRQEIGQIVGCSRETVGRILKMLEDQNLISAHGKTIVVYGTR	MVLGKPQTDPTLEWFLSHCHIHKYPSKSKLIHQGEKAETLYYIVKGSVAVLIKDEEGKEMILSYLNQGDFIGELGLFEEGQERSAWVRAKTACEVAEISYKKFRQLIQVNPDILMRLSAQMARRLQVTSEKVGNLAFLDVTGRIAQTLLNLAKQPDAMTHPDGMQIKITRQEIGQIVGCSRETVGRILKMLEDQNLISAHGKTIVVYGTR	100	gnl|BL_ORD_ID|803|hsp_num:0	869			0	630	erythromycin; cloxacillin; oxacillin; norfloxacin
	1_621 # 660339 # 661160 # 1 # ID=1_621;partial=00;start_type=ATG;rbs_motif=AGG;rbs_spacer=9bp;gc_cont=0.536	1_621	660339	661160	+	Strict	500	511.5	bacA	97.07	3002986	protein homolog model	n/a	n/a	peptide antibiotic	antibiotic target alteration	undecaprenyl pyrophosphate related proteins	ATGAGCGATATGCACTCGCTGCTGATAGCGGCAATTTTGGGTGTGGTCGAAGGATTGACGGAGTTTTTGCCGGTATCCAGCACGGGCCATATGATTATTGTGGGTCATCTGCTGGGGTTTGAAGGCGATACGGCCAAGACATTCGAAGTGGTGATTCAACTTGGATCTATTCTGGCGGTCGTGGTGATGTTCTGGCGGCGGTTGTTTGGCCTCATCGGTATTCACTTTGGCCGCCCGCTACAGCGTGAAGGTGAAAGTAAAGGTCGATTAACGTTGATTCACATCCTGCTGGGCATGATTCCGGCGGTGGTGCTGGGGTTAGTCTTTCATGACACGATCAAGTCGCTATTTAACCCAATTAACGTGATGTACGCGCTGGTGGTAGGCGGTCTGTTGCTG…	MSDMHSLLIAAILGVVEGLTEFLPVSSTGHMIIVGHLLGFEGDTAKTFEVVIQLGSILAVVVMFWRRLFGLIGIHFGRPLQREGESKGRLTLIHILLGMIPAVVLGLVFHDTIKSLFNPINVMYALVVGGLLLIAAECLKPKEPRAPGLDDMTYRQAFMIGCFQCLALWPGFSRSGATISGGMLMGVSRYAASEFSFLLAVPMMMGATVLDLYKSWSFLTAADIPMFAVGFVTAFVVALIAIKTFLQLIKRISFIPFAIYRFVVAAAVYVVFF	MSDMHSLLIAAILGVVEGLTEFLPVSSTGHMIIVGHLLGFEGDTAKTFEVVIQLGSILAVVVMFWRRLFGLIGIHFGRPLQHEGESKGRLTLIHILLGMIPAVVLGLLFHDTIKSLFNPINVMYALVVGGLLLIAAECLKPKEPRAPGLDDMTYRQAFMIGCFQCLALWPGFSRSGATISGGMLMGVSRYAASEFSFLLAVPMMMGATALDLYKSWGFLTSGDIPMFAVGFITAFVVALIAIKTFLQLIKRISFIPFAIYRFIVAAAVYVVFF	100	gnl|BL_ORD_ID|1680|hsp_num:0	1820			0	819	bacitracin; bacitracin A; bacitracin B; bacitracin F
	1_1004 # 1063904 # 1064089 # 1 # ID=1_1004;partial=00;start_type=ATG;rbs_motif=AGGAG;rbs_spacer=6bp;gc_cont=0.511	1_1004	1063904	1064089	+	Strict	100	102.4	rsmA	85.25	3005069	protein homolog model	n/a	n/a	fluoroquinolone antibiotic; diaminopyrimidine antibiotic; phenicol antibiotic	antibiotic efflux	resistance-nodulation-cell division (RND) antibiotic efflux pump	ATGCTGATTCTGACTCGTCGAGTTGGTGAGACCCTCATGATTGGCGATGAGGTCACCGTGACAGTTTTAGGGGTGAAGGGCAACCAGGTGCGTATTGGCGTGAACGCCCCGAAAGAAGTTTCTGTCCATCGTGAAGAGATCTACCAGCGTATCCAGGCTGAAAAATCCCAGCAGTCCAGTTACTAA	MLILTRRVGETLMIGDEVTVTVLGVKGNQVRIGVNAPKEVSVHREEIYQRIQAEKSQQSSY	MLILTRRVGETLMVGDDVTVTVLGVKGNQVRIGVNAPKEVAVHREEIYQRIQKEKDQEPNH	100	gnl|BL_ORD_ID|2788|hsp_num:0	3807			0	183	trimethoprim; chloramphenicol
	1_1010 # 1070400 # 1071938 # -1 # ID=1_1010;partial=00;start_type=ATG;rbs_motif=GAGG;rbs_spacer=8bp;gc_cont=0.571	1_1010	1070400	1071938	-	Strict	900	966.5	emrB	95.9	3000074	protein homolog model	n/a	n/a	fluoroquinolone antibiotic	antibiotic efflux	major facilitator superfamily (MFS) antibiotic efflux pump	ATGCAACAGCAAAAACCGCTGGAGGGCGCGCAGCTCGTCATCATGACGATCGCGCTGTCGCTGGCGACATTCATGCAGGTGCTGGACTCCACCATTGCCAACGTGGCGATTCCGACCATCGCCGGGAACCTGGGTTCTTCCCTAAGCCAGGGGACATGGGTTATCACCTCTTTCGGGGTGGCGAACGCTATCTCGATTCCCTTAACCGGCTGGCTGGCGAAACGTTTTGGCGAAGTCAAACTGTTCATGTGGTCGACGGTCGCCTTTGCCGCGGCCTCCTGGGCCTGTGGCGTATCCAGCAGCCTGAATATGCTTATCTTCTTCCGCGTGGTGCAGGGCGTGGTCGCCGGGCCGCTGATTCCGCTCTCGCAAAGCCTGTTGCTGAATAACTATCCGCCT…	MQQQKPLEGAQLVIMTIALSLATFMQVLDSTIANVAIPTIAGNLGSSLSQGTWVITSFGVANAISIPLTGWLAKRFGEVKLFMWSTVAFAAASWACGVSSSLNMLIFFRVVQGVVAGPLIPLSQSLLLNNYPPAKRSIALALWSMTVIVAPICGPILGGYISDNYHWGWIFFINVPIGIAVVLMTLHTLRGRETHTERRRIDAVGLALLVIGIGSLQIMLDRGKELDWFSSQEIIILTVVAVIAISFLIVWELTDDHPIVDLSLFKSRNFTIGCLCISLAYMLYFGAIVLLPQLLQEVYGYTATWAGLASAPVGIIPVILSPIIGRFAHKLDMRRLVTFSFIMYAVCFYWRAWTFEPGMDFGASAWPQFIQGFAVACFFMPLTTITLSGLPPERLAAAS…	MQQQKPLEGAQLVIMTIALSLATFMQVLDSTIANVAIPTIAGNLGSSLSQGTWVITSFGVANAISIPLTGWLAKRVGEVKLFLWSTIAFAIASWACGVSSSLNMLIFFRVIQGIVAGPLIPLSQSLLLNNYPPAKRSIALALWSMTVIVAPICGPILGGYISDNYHWGWIFFINVPIGVAVVLMTLQTLRGRETRTERRRIDAVGLALLVIGIGSLQIMLDRGKELDWFSSQEIIILTVVAVVAICFLIVWELTDDNPIVDLSLFKSRNFTIGCLCISLAYMLYFGAIVLLPQLLQEVYGYTATWAGLASAPVGIIPVILSPIIGRFAHKLDMRRLVTFSFIMYAVCFYWRAYTFEPGMDFGASAWPQFIQGFAVACFFMPLTTITLSGLPPERLAAAS…	100	gnl|BL_ORD_ID|1705|hsp_num:0	1847			0	1536	nalidixic acid
	1_1012 # 1073254 # 1073784 # -1 # ID=1_1012;partial=00;start_type=ATG;rbs_motif=GAGG;rbs_spacer=10bp;gc_cont=0.482	1_1012	1073254	1073784	-	Strict	280	327	emrR	93.14	3000516	protein homolog model	n/a	n/a	fluoroquinolone antibiotic	antibiotic efflux	major facilitator superfamily (MFS) antibiotic efflux pump	ATGGATAGTTCGTTTACGCCCATTGAACAAATGCTAAAATTTCGCGCCAGCCGTCACGAAGACTTTCCTTATCAGGAAATTCTTTTGACTCGTCTTTGTATGCACATGCAAGGCAAGCTCCTGGAAAACCGCAATAAAATGCTGAAGGCTCAAGGGATTAACGAGACGTTGTTTATGGCGTTGATTACGCTGGAGTCTCAGGAAAACCACAGTATTCAGCCGTCTGAATTAAGCTGCGCGCTGGGTTCATCTCGCACCAATGCGACACGCATTGCAGATGAGCTGGAAAAACGCGGCTGGATTGAGCGTCGTGAGAGCGATAACGACCGCCGTTGCCTGCATCTGCAATTAACGGAGAAAGGCCAGGCATTTTTGCAAGAAGTGCTTCCGCCTCAGCAT…	MDSSFTPIEQMLKFRASRHEDFPYQEILLTRLCMHMQGKLLENRNKMLKAQGINETLFMALITLESQENHSIQPSELSCALGSSRTNATRIADELEKRGWIERRESDNDRRCLHLQLTEKGQAFLQEVLPPQHHCLHQLWSSLSTAEKDQLEHITRKLLTRLDQMEQEGTVLEALR	MDSSFTPIEQMLKFRASRHEDFPYQEILLTRLCMHMQSKLLENRNKMLKAQGINETLFMALITLESQENHSIQPSELSCALGSSRTNATRIADELEKRGWIERRESDNDRRCLHLQLTEKGHEFLREVLPPQHNCLHQLWSALSTTEKDQLEQITRKLLSRLDQMEQDGVVLEAMS	100	gnl|BL_ORD_ID|1225|hsp_num:0	1330			0	525	nalidixic acid
	1_1392 # 1514972 # 1516618 # -1 # ID=1_1392;partial=00;start_type=ATG;rbs_motif=GAG;rbs_spacer=6bp;gc_cont=0.541	1_1392	1514972	1516618	-	Strict	400	718.8	ArnT	62.61	3005053	protein homolog model	n/a	n/a	peptide antibiotic	antibiotic target alteration	pmr phosphoethanolamine transferase	ATGATGAAATCGATACGCTATTATCTGGCTTTCGCCGCATTTATCGCGCTCTACTATGTTATTCCTGTCAATAGCCGCCTGCTCTGGCAGCCGGATGAAACGCGCTATGCCGAAATAAGTCGGGAGATGCTGGCGTCTGGCGACTGGATCGTGCCGCATTTTCTGGGATTACGTTATTTTGAAAAACCGATAGCCGGTTACTGGATAAACAGTCTGGGTCAGTGGCTTTTTGGCGCTACCAATTTTGGCGTGCGGGCTGGCGCTATTTTAACGACATTGCTGGCCGCAGCGCTGGTGGCGTGGCTGACGTTCCGCTTATGGCGGGATAAACGTACCGCGTTGCTCGCCTCCGTTATCTTTCTCTCCCTCTTTGCCGTTTACAGTATCGGGACGTATGCG…	MMKSIRYYLAFAAFIALYYVIPVNSRLLWQPDETRYAEISREMLASGDWIVPHFLGLRYFEKPIAGYWINSLGQWLFGATNFGVRAGAILTTLLAAALVAWLTFRLWRDKRTALLASVIFLSLFAVYSIGTYAVLDPMIALWLTAGMCCFWQGMQATTRTGKIGMFLLLGATCGLGVLTKGFLALAVPVVSVLPWVIVQKRWKDFLLYGWLAVLSCFVVVLPWAIAIARREADFWHYFFWVEHIQRFAMSDAQHKAPFWYYLPVLLAGSLPWLGLLPGALKLGWRERNGAFYLLGWTIMPLLFFSIAKGKLPTYVLSCFAPIAILMARFVLHNVKEGVAALRVNGGINLVFGIIGIVAAFVVSSWGPLKSPVWTHIETYKVFCVWGVFTVWAFVGWYSL…	MKSIRYGVSLIALFALYYLLPLNFRLLWQPDETRYAEISREMLATGDWVVPHFLGLRYFEKPIAGYWINSIGQWLFGHNNFGVRFGSVFAITMTALLVAWLAWRIFRDKRVAILSLIIFLTAMLVYAIGTYAVLDPMITLWLALAMCSFWGAVQAHSRSGKILGYVLLGVACGMGVMTKGFLALAVPVVGVLPWVIARKRWREVLTYGWLAVIVCTLVVLPWGLAIAQREPDFWRYFFWVEHIQRFAEKDAQHKAPFWYYIPFLIAGSLPWLALLPGALKRGWLERDEARGALYLLGWVAMPFLFFSIAKGKLPTYILPCFAPLSILMARYALEAAKTGAKALRINGMINLGVGLLGLIAVLVVSPWGFMHKPVWTKIELYKCLLAAIAFAVWALMGWL…	99.46	gnl|BL_ORD_ID|2779|hsp_num:0	3795			0	1653	colistin A; colistin B
	1_1395 # 1519490 # 1520473 # -1 # ID=1_1395;partial=00;start_type=ATG;rbs_motif=AGGA;rbs_spacer=8bp;gc_cont=0.538	1_1395	1519490	1520473	-	Strict	550	554.7	PmrF	87.42	3003578	protein homolog model	n/a	n/a	peptide antibiotic	antibiotic target alteration	pmr phosphoethanolamine transferase	ATGTTTGACGCCGCCCCCATAAAAAAAGTCTCGGTGGTTATTCCTGTCTATAACGAACAGGAAAGCCTGCCGGAATTGATAAGACGCACCACCGCCGCCTGCGAGAGTCTGGGCAAAGCGTGGGAGATTTTATTGATAGATGATGGTAGCAGCGATAGCTCGGCGGAGCTGATGGTTAAGGCGTCCCAGGAAGCCGATAGCCATATCATCTCTATTTTACTCAACCGTAACTACGGTCAACATGCAGCGATCATGGCGGGGTTTAGCCATGTAAGCGGCGATCTCATCATTACGCTGGATGCCGATCTGCAAAACCCGCCGGAAGAGATCCCGCGCCTGGTGGCGAAAGCCGATGAAGGGTTCGATGTGGTAGGCACCGTGCGCCAGAACCGACAGGAC…	MFDAAPIKKVSVVIPVYNEQESLPELIRRTTAACESLGKAWEILLIDDGSSDSSAELMVKASQEADSHIISILLNRNYGQHAAIMAGFSHVSGDLIITLDADLQNPPEEIPRLVAKADEGFDVVGTVRQNRQDSLFRKSASKIINLLIQRTTGKAMGDYGCMLRAYRRPIIDTMLRCHERSTFIPILANIFARRATEIPVHHAEREFGDSKYSFMRLINLMYDLVTCLTTTPLRLLSLLGSVIAIGGFSLSVLLIVLRLALGPQWAAEGVFMLFAVLFTFIGAQFIGMGLLGEYIGRIYNDVRARPRYFVQQVIYPESTPFTEESHQ	MFEIHPVKKVSVVIPVYNEQESLPELIRRTTTACESLGKEYEILLIDDGSSDNSAHMLVEASQAENSHIVSILLNRNYGQHSAIMAGFSHVTGDLIITLDADLQNPPEEIPRLVAKADEGYDVVGTVRQNRQDSWFRKTASKMINRLIQRTTGKAMGDYGCMLRAYRRHIVDAMLHCHERSTFIPILANIFARRAIEIPVHHAEREFGESKYSFMRLINLMYDLVTCLTTTPLRMLSLLGSIIAIGGFSIAVLLVILRLTFGPQWAAEGVFMLFAVLFTFIGAQFIGMGLLGEYIGRIYTDVRARPRYFVQQVIRPSSKENE	101.55	gnl|BL_ORD_ID|1936|hsp_num:0	2014			0	954	polymyxin B
	1_1668 # 1820416 # 1821840 # 1 # ID=1_1668;partial=00;start_type=TTG;rbs_motif=AGG;rbs_spacer=6bp;gc_cont=0.538	1_1668	1820416	1821840	+	Strict	900	909.1	MdtK	99.16	3001327	protein homolog model	n/a	n/a	fluoroquinolone antibiotic	antibiotic efflux	multidrug and toxic compound extrusion (MATE) transporter	TTGAACGTCTCCACTGCCTTACGCCAGGCTGTCGTCCGTACGCCCTGGTATGCCAAACGCAAGAGCTACAAAGTGTTGTTCTGGCGTGAAATCACCCCACTTGCTATCCCTATTTTTCTGGAAAATACCTGTGTTTTGCTAATGGGCGTGCTCAGTACTTTTCTCGTCAGTTGGCTGGGCAAGGAAGCAATGGCGGGCGTGGGGCTTGCCGACAGTTTTAATATGGTAATTATGGCTTTTTTTGCGGCTATCGATCTTGGTACTACGGTGGTGGTTGCCTTTAGCCTGGGCAAGCGCGACAGGCGACGGGCAAGGGCGGCGGCGCGCCAGTCGCTGGTGATTATGACGCTATTTGCCGTTGTGCTGGCAGTGGTCATTCATTATTTCGGCAGTGAAATT…	MNVSTALRQAVVRTPWYAKRKSYKVLFWREITPLAIPIFLENTCVLLMGVLSTFLVSWLGKEAMAGVGLADSFNMVIMAFFAAIDLGTTVVVAFSLGKRDRRRARAAARQSLVIMTLFAVVLAVVIHYFGSEIINIVAGEATSEVKGLALTYLELTVLSYPAAAIALIGSGALRGAGNTKIPLMINGGMNILNIIISSILIYGAFSWQGLGFAGAGLGLTISRYIGAVAIIWVLMIGFNPALRIPLKSYLKPLNFGIIWEVMGIGIPASIESVLFNGGKLLTQMFVAGMGTNVIAGNFIAFSVAALINLPGNALGSASTIITGKRLGTGQIGQAERQLRHVFWMSTIVLTAIAWGTAPFAGLFASFYTQEQDVKEVVKVLLWLNAVFMPIWAAAWVLPS…	MNVSTALRQAVVRTPWYAKRKSYKVLFWREITPLAIPIFLENTCVLLMGVLSTFLVSWLGKEAMAGVGLADSFNMVIMAFFAAIDLGTTVVVAFSLGKRDRRRARAAARQSLVIMTLFAVVLAVVIHYFGSEIINIVAGEATPEVKGLALTYLELTVLSYPAAAIALIGSGALRGAGNTKIPLMINGGMNILNIIISSILIYGAFSWQGLGFAGAGLGLTISRYIGAVAIIWVLMIGFNPALRIPLKSYLKPLNFGIIWEVMGIGIPASIESVLFNGSKLLTQMFVAGMGTNVIAGNFIAFSVAALINLPGNALGSASTIITGKRLGTGQIGQAERQLRHVFWMSTIVLTAIAWGTAPFAGLFASFYTQEQDVKEVVKVLLWLNAAFMPIWAAAWVLPS…	100	gnl|BL_ORD_ID|1649|hsp_num:0	1752			0	1422	ciprofloxacin
	1_2111 # 2250561 # 2250923 # 1 # ID=1_2111;partial=00;start_type=ATG;rbs_motif=AGGAG;rbs_spacer=7bp;gc_cont=0.446	1_2111	2250561	2250923	+	Strict	150	169.1	Klebsiella pneumoniae KpnE	76.67	3004580	protein homolog model	n/a	n/a	macrolide antibiotic; aminoglycoside antibiotic; cephalosporin; tetracycline antibiotic; peptide antibiotic; rifamycin antibiotic; disinfecting agents and antiseptics	antibiotic efflux	small multidrug resistance (SMR) antibiotic efflux pump	ATGTTTTACTGGATTTTATTAGCTCTGGCTATCGCGACTGAAATTACCGGCACGCTCTCAATGAAATGGGCTAGCGTGGGTAATGGCAATGCGGGTTTTATTTTAATGCTGGTGATGATCACGCTGTCATATATATTTCTTTCTTTTGCGGTAAAAAAGATTGCCCTGGGTGTAGCGTATGCCTTATGGGAAGGGATCGGCATTTTATTTATTACCATTTTTAGCGTGCTGCTATTTGATGAAGCATTATCAACCATGAAGATTGCCGGCTTGCTGACGCTGGTCGCCGGCATAGTATTGATCAAATCAGGGACGCGTAAACCCGGCAAACCGGTGAAGGAGGCGACTCGTGCAACAATTTGA	MFYWILLALAIATEITGTLSMKWASVGNGNAGFILMLVMITLSYIFLSFAVKKIALGVAYALWEGIGILFITIFSVLLFDEALSTMKIAGLLTLVAGIVLIKSGTRKPGKPVKEATRATI	MFYWILLALAIIAEITGTLSMKWASVSGGHTGFILMLAMIALSYIFLAFAVKKIALGVAYALWEGIGILLITLFSVLLFDESLSLLKIAGLTTLVIGIVLIKSGTQKKASSQQEVAHAAV	100	gnl|BL_ORD_ID|2715|hsp_num:0	3283			0	360	erythromycin; streptomycin; tetracycline; cefepime; ceftriaxone; rifampin; colistin A; colistin B; triclosan; benzalkonium chloride; chlorhexidine
	1_2112 # 2250910 # 2251239 # 1 # ID=1_2112;partial=00;start_type=GTG;rbs_motif=AGGAG;rbs_spacer=7bp;gc_cont=0.558	1_2112	2250910	2251239	+	Strict	150	189.1	Klebsiella pneumoniae KpnF	87.16	3004583	protein homolog model	n/a	n/a	macrolide antibiotic; aminoglycoside antibiotic; cephalosporin; tetracycline antibiotic; peptide antibiotic; rifamycin antibiotic; disinfecting agents and antiseptics	antibiotic efflux	small multidrug resistance (SMR) antibiotic efflux pump	GTGCAACAATTTGAATGGATACACGGCGCCTGGCTTGGGCTGGCAATAATGCTGGAAATCGCGGCTAACGTACTGTTGAAATTTTCGGACGGCTTTCGCCGTAAATGCTATGGCATCTTATCGCTTGCCGCTGTTCTGGCCGCCTTCAGCGCGCTTTCCCAGGCGGTAAAAGGGATAGACCTGTCGGTGGCGTATGCGTTATGGGGCGGTTTTGGTATTGCCGCCACGCTGGCGGCGGGCTGGGTGCTCTTCGGCCAGCGCTTAAACCCCAAAGGCTGGGTTGGCGTGATATTGCTGCTCGCCGGAATGGTCATGATCAAATTTGCCTGA	MQQFEWIHGAWLGLAIMLEIAANVLLKFSDGFRRKCYGILSLAAVLAAFSALSQAVKGIDLSVAYALWGGFGIAATLAAGWVLFGQRLNPKGWVGVILLLAGMVMIKFA	MQQFEWIHAAWLAIAIVLEIIANVFLKFSDGFRRKIYGILSLAAVLGAFSALSQAVKGIDLSVAYALWGGFGIAATIAAGWVLFGQRLNNKGWAGVILLVAGMVLIKLA	100	gnl|BL_ORD_ID|2717|hsp_num:0	3286			0	327	erythromycin; streptomycin; tetracycline; cefepime; ceftriaxone; rifampin; colistin A; colistin B; triclosan; benzalkonium chloride; chlorhexidine
	1_2149 # 2287420 # 2287803 # -1 # ID=1_2149;partial=00;start_type=ATG;rbs_motif=GAGG;rbs_spacer=7bp;gc_cont=0.471	1_2149	2287420	2287803	-	Strict	230	247.3	marA	95.24	3000263	protein homolog model	n/a	n/a	fluoroquinolone antibiotic; monobactam; carbapenem; cephalosporin; glycylcycline; cephamycin; penam; tetracycline antibiotic; rifamycin antibiotic; phenicol antibiotic; penem; disinfecting agents and antiseptics	antibiotic efflux; reduced permeability to antibiotic	resistance-nodulation-cell division (RND) antibiotic efflux pump; General Bacterial Porin with reduced permeability to beta-lactams	ATGTCCAGACGCAACACTGACGCTATTACTATTCATAGCATTTTGGACTGGATCGAGGATAACCTGGAGTCGCCGCTCTCACTGGAAAAAGTGTCTGAGCGTTCAGGATATTCCAAATGGCACCTGCAACGGATGTTTAAAAAAGAGACCGGTCATTCATTAGGCCAATACATCCGCAGCCGTAAAATGACGGAAATCGCGCAAAAATTAAAAGAGAGCAACGAGCCCATTCTCTATCTGGCGGAACGCTATGGCTTTGAGTCACAGCAAACATTGACCCGGACGTTCAAAAACTACTTTGATGTGCCGCCACACAAATACCGGATCACCAATATGCATGGCGAATCACGGTATATGCTGCCGCTGAACCATGGCAACTACTAG	MSRRNTDAITIHSILDWIEDNLESPLSLEKVSERSGYSKWHLQRMFKKETGHSLGQYIRSRKMTEIAQKLKESNEPILYLAERYGFESQQTLTRTFKNYFDVPPHKYRITNMHGESRYMLPLNHGNY	MSRRNTDAITIHSILDWIEDNLESPLSLEKVSERSGYSKWHLQRMFKKETGHSLGQYIRSRKMTEIAQKLKESNEPILYLAERYGFESQQTLTRTFKNYFDVPPHKYRMTNMQGESRFLHPLNHYNS	100	gnl|BL_ORD_ID|1771|hsp_num:0	1922			0	378	tigecycline; tetracycline; rifampin; chloramphenicol; ampicillin; cefalotin; triclosan
	1_2244 # 2393159 # 2393596 # 1 # ID=1_2244;partial=00;start_type=ATG;rbs_motif=AGGAG;rbs_spacer=7bp;gc_cont=0.523	1_2244	2393159	2393596	+	Strict	275	298.1	AAC(6')-Iy	97.24	3002569	protein homolog model	n/a	n/a	aminoglycoside antibiotic	antibiotic inactivation	AAC(6')	ATGGACATCAGGCAAATGAACAAAACCCATCTGGAGCACTGGCGCGGATTGCGAAAACAGCTCTGGCCCGGTCACCCGGATGACGCCCATCTGGCAGACGGCGAAGAAATCCTGCAAGCCGATCATTTGGCATCATTTGTTGCGATGGCAGACGGGGTGGCGATTGGCTTTGCGGATGCCTCAATCCGCCACGATTATGTCAATGGCTGTGACAGTTCGCCCGTGGCTTTTCTTGAAGGTATTTTTGTTCTCCCCTCGTTCCGTCAACGCGGCGTAGCGAAACAATTGATTGCAGCGGTGCAACGATGGGGAACGAATAAAGGGTGTCGGGAAATGGCCTCTGATACCACGCCGGAAAATACAATTTCCCAGAAAGTTCACCTGGCATTAGGATTTGAG…	MDIRQMNKTHLEHWRGLRKQLWPGHPDDAHLADGEEILQADHLASFVAMADGVAIGFADASIRHDYVNGCDSSPVAFLEGIFVLPSFRQRGVAKQLIAAVQRWGTNKGCREMASDTTPENTISQKVHLALGFEETERVIFYRKRC	MDIRQMNKTHLEHWRGLRKQLWPGHPDDAHLADGEEILQADHLASFIAMADGVAIGFADASIRHDYVNGCDSSPVVFLEGIFVLPSFRQRGVAKQLIAAVQRWGTNKGCREMASDTSPENTISQKVHQALGFEETERVIFYRKRC	100	gnl|BL_ORD_ID|330|hsp_num:0	360			0	435	dibekacin; amikacin; sisomicin; netilmicin; tobramycin; 2'-N-ethylnetilmicin; 5-episisomicin
	1_2403 # 2550216 # 2550629 # 1 # ID=1_2403;partial=00;start_type=ATG;rbs_motif=GAG;rbs_spacer=9bp;gc_cont=0.454	1_2403	2550216	2550629	+	Strict	240	245.7	H-NS	94.89	3000676	protein homolog model	n/a	n/a	macrolide antibiotic; fluoroquinolone antibiotic; cephalosporin; cephamycin; penam; tetracycline antibiotic	antibiotic efflux	major facilitator superfamily (MFS) antibiotic efflux pump; resistance-nodulation-cell division (RND) antibiotic efflux pump	ATGAGCGAAGCACTTAAAATTCTGAACAACATCCGTACTCTTCGTGCGCAGGCAAGAGAATGTACTCTGGAAACGCTTGAAGAAATGCTGGAAAAATTAGAAGTTGTCGTTAATGAGCGTCGTGAAGAAGAAAGCGCTGCTGCTGCTGAAGTGGAAGAACGCACTCGTAAACTGCAACAGTATCGTGAAATGTTAATTGCCGACGGCATTGACCCGAATGAACTGCTGAATAGCATGGCTGCCGCTAAATCCGGTACCAAAGCTAAACGCGCAGCTCGTCCGGCTAAATATAGCTATGTTGACGAAAACGGTGAAACTAAAACCTGGACTGGCCAGGGTCGTACACCGGCTGTAATCAAAAAAGCAATGGAAGAACAAGGTAAGCAACTGGAAGATTTC…	MSEALKILNNIRTLRAQARECTLETLEEMLEKLEVVVNERREEESAAAAEVEERTRKLQQYREMLIADGIDPNELLNSMAAAKSGTKAKRAARPAKYSYVDENGETKTWTGQGRTPAVIKKAMEEQGKQLEDFLIKE	MSEALKILNNIRTLRAQARECTLETLEEMLEKLEVVVNERREEESAAAAEVEERTRKLQQYREMLIADGIDPNELLNSLAAVKSGTKAKRAQRPAKYSYVDENGETKTWTGQGRTPAVIKKAMDEQGKSLDDFLIKQ	100	gnl|BL_ORD_ID|1144|hsp_num:0	1248			0	411	erythromycin; cloxacillin; ciprofloxacin; tetracycline; oxacillin; norfloxacin
	1_2621 # 2764208 # 2764930 # -1 # ID=1_2621;partial=00;start_type=ATG;rbs_motif=None;rbs_spacer=None;gc_cont=0.492	1_2621	2764208	2764930	-	Strict	470	488.4	sdiA	99.58	3000826	protein homolog model	n/a	n/a	fluoroquinolone antibiotic; cephalosporin; glycylcycline; penam; tetracycline antibiotic; rifamycin antibiotic; phenicol antibiotic; disinfecting agents and antiseptics	antibiotic efflux	resistance-nodulation-cell division (RND) antibiotic efflux pump	ATGCAGGAAAATGATTTCTTCACCTGGCGACGCGCAATGTTGTTACGCTTTCAGGAGATGGCGGCAGCAGAGGATGTTTATACTGAATTGCAATATCAGACACAGCGGCTGGAATTTGATTATTATGCCCTGTGTGTTCGTCATCCCGTCCCCTTTACCCGGCCTAAAATATCGCTTCGTACCACTTATCCTCCGGCGTGGGTAACGCATTACCAGTCCGAAAACTATTTTGCGATCGATCCGGTATTAAAGCCGGAAAATTTCAGGCAGGGTCATTTACATTGGGATGACGTGCTATTTCATGAAGCGCAGGCGATGTGGGATGCCGCCCAGCGTTTCGGATTACGCAGAGGCGTAACCCAGTGTGTGATGTTGCCGAACCGGGCGCTGGGCTTTTTA…	MQENDFFTWRRAMLLRFQEMAAAEDVYTELQYQTQRLEFDYYALCVRHPVPFTRPKISLRTTYPPAWVTHYQSENYFAIDPVLKPENFRQGHLHWDDVLFHEAQAMWDAAQRFGLRRGVTQCVMLPNRALGFLSFSRSSLRCSSFTYDEVELRLQLLARESLSALTRFEDDMVMAPEMRFSKREKEILKWTAEGKTSSEIAIILSISENTVNFHQKNMQKKFNAPNKTQIACYAAATGLI	MQENDFFTWRRAMLLRFQEMAAAEDVYTELQYQTQRLEFDYYALCVRHPVPFTRPKISLRTTYPPAWVTHYQSENYFAIDPVLKPENFRQGHLHWDDVLFHEAKAMWDAAQRFGLRRGVTQCVMLPNRALGFLSFSRSSLRCSSFTYDEVELRLQLLARESLSALTRFEDDMVMAPEMRFSKREKEILKWTAEGKTSSEIAIILSISENTVNFHQKNMQKKFNAPNKTQIACYAAATGLI	100	gnl|BL_ORD_ID|208|hsp_num:0	228			0	720	tigecycline; tetracycline; rifampin; chloramphenicol; ampicillin; cefalotin; triclosan
	1_2791 # 2932277 # 2934025 # -1 # ID=1_2791;partial=00;start_type=ATG;rbs_motif=None;rbs_spacer=None;gc_cont=0.516	1_2791	2932277	2934025	-	Strict	1000	1067.4	msbA	96.39	3003950	protein homolog model	n/a	n/a	nitroimidazole antibiotic	antibiotic efflux	ATP-binding cassette (ABC) antibiotic efflux pump	ATGCATAACGATAAAGATCTCTCTACGTGGCAGACCTTCCGCCGACTGTGGCCAACCATAGCGCCTTTTAAAGCAGGTCTGATCGTGGCGGGCATAGCGTTAATTCTCAACGCAGCCAGCGATACCTTCATGCTATCGCTCCTCAAGCCATTACTGGATGATGGTTTCGGTAAAACGGATCGCTCAGTGTTGCTGTGGATGCCGCTGGTGGTTATTGGGCTGATGATATTACGAGGCATCACTAGCTATATCTCCAGCTACTGTATTTCATGGGTGTCAGGCAAGGTGGTAATGACCATGCGCCGTCGCCTGTTTGGCCATATGATGGGAATGCCCGTCGCCTTCTTTGATAAACAGTCTACCGGTACGCTGCTGTCGCGTATTACTTACGATTCAGAA…	MHNDKDLSTWQTFRRLWPTIAPFKAGLIVAGIALILNAASDTFMLSLLKPLLDDGFGKTDRSVLLWMPLVVIGLMILRGITSYISSYCISWVSGKVVMTMRRRLFGHMMGMPVAFFDKQSTGTLLSRITYDSEQVASSSSGALITVVREGASIIGLFIMMFYYSWQLSIILVVLAPIVSIAIRVVSKRFRSISKNMQNTMGQVTTSAEQMLKGHKEVLIFGGQEVETKRFDKVSNKMRLQGMKMVSASSISDPIIQLIASLALAFVLYAASFPSVMDSLTAGTITVVFSSMIALMRPLKSLTNVNAQFQRGMAACQTLFAILDSEQEKDEGKRVIDRATGDLEFRNVTFTYPGREVPALRNINLKIPAGKTVALVGRSGSGKSTIASLITRFYDIDEGH…	MHNDKDLSTWQTFRRLWPTIAPFKAGLIVAGVALILNAASDTFMLSLLKPLLDDGFGKTDRSVLVWMPLVVIGLMILRGITSYVSSYCISWVSGKVVMTMRRRLFGHMMGMPVSFFDKQSTGTLLSRITYDSEQVASSSSGALITVVREGASIIGLFIMMFYYSWQLSIILIVLAPIVSIAIRVVSKRFRNISKNMQNTMGQVTTSAEQMLKGHKEVLIFGGQEVETKRFDKVSNRMRLQGMKMVSASSISDPIIQLIASLALAFVLYAASFPSVMDSLTAGTITVVFSSMIALMRPLKSLTNVNAQFQRGMAACQTLFTILDSEQEKDEGKRVIERATGDVEFRNVTFTYPGRDVPALRNINLKIPAGKTVALVGRSGSGKSTIASLITRFYDIDEGE…	100	gnl|BL_ORD_ID|2183|hsp_num:0	2423			0	1746	metronidazole
	1_2866 # 3020996 # 3022228 # -1 # ID=1_2866;partial=00;start_type=ATG;rbs_motif=GAG;rbs_spacer=5bp;gc_cont=0.554	1_2866	3020996	3022228	-	Strict	700	700.7	Escherichia coli mdfA	87.71	3001328	protein homolog model	n/a	n/a	tetracycline antibiotic; disinfecting agents and antiseptics	antibiotic efflux	major facilitator superfamily (MFS) antibiotic efflux pump	ATGCAGAATCGTTTACAATCAGGCGGCAGGCTGGGACGTCAGGCGCTGCTTTTTCCTCTCTGTCTGGTGCTGTACGAATTTTCTACTTATATTGGCAACGACATGATCCAGCCGGGTATGCTGGCGGTGGTTGAGCAGTATCAGGCGTGCCTGGACTGGGTTCCGACGTCCATGACCGCTTATCTGGCGGGCGGTATGTTCTTACAGTGGCTGCTTGGCCCGTTGTCTGACCGGATTGGCCGTCGTCCCGTGATGCTGGCGGGCGTCGTGTGGTTTATTGTCACCTGCCTGGCGACGTTACTGGCGAAAAACATCGAACAATTTACCTTCCTGCGTTTTTTGCAAGGGATTAGCCTGTGTTTTATCGGCGCTGTAGGGTATGCCGCGATTCAGGAGTCC…	MQNRLQSGGRLGRQALLFPLCLVLYEFSTYIGNDMIQPGMLAVVEQYQACLDWVPTSMTAYLAGGMFLQWLLGPLSDRIGRRPVMLAGVVWFIVTCLATLLAKNIEQFTFLRFLQGISLCFIGAVGYAAIQESFEEAVCIKITALMANVALIAPLLGPLVGAAWVHVLPWEGMFILFAALAAIAFFGLQRAMPETATRRGETLSFKALGRDYRLVIKNRRFVAGALALGFVSLPLLAWIAQSPIIIISGEQLSSYEYGLLQVPVFGALIAGNLVLARLTSRRTVRSLIVMGGWPIVAGLIIAAAATVVSSHAYLWMTAGLSVYAFGIGLANAGLVRLTLFSSDMSKGTVSAAMGMLQMLIFTVGIEVSKHAWLSGGNGLFSLFNLANGILWLLLMLVFL…	MQNKLASGARLGRQALLFPLCLVLYEFSTYIGNDMRQPGMLENVEQYQAGIEWVPTSMNAYLAGGMFIQWLLGPLSDRIGRRPVMLAGVVWFIVTCLAILLAQNIEQFTLLRFLHGISLCFIGAVGYDAIQESFEEAVCIKITALMANVALIAPLLGPLVGASWIHVLPWEGMFVLFAALAAISFFGLQRAMPETATRIGEKLSLKELGRDYKLVLKNGRFVAGALALGFLSLPLLAWIAQSPIIIITGEQLSSYEYGLLQVPIFGALIAGNLLLARLTSRRTVRSLIIMGGWPIMIGLLVAAAATVISSHAYLWMTAGLSIYAFGIGLANAGLVRLTLFASVMSKGTVSAAMGMLQMLIFTVGIEISKHAWLNGGNGLFNLFNLVNGILLLSLMVIFL…	100	gnl|BL_ORD_ID|2417|hsp_num:0	37			0	1221	tetracycline; benzalkonium chloride
	1_3016 # 3180528 # 3181205 # 1 # ID=1_3016;partial=00;start_type=GTG;rbs_motif=GAGGA;rbs_spacer=3bp;gc_cont=0.563	1_3016	3180528	3181205	+	Strict	400	422.9	kdpE	91.96	3003841	protein homolog model	n/a	n/a	aminoglycoside antibiotic	antibiotic efflux	kdpDE	GTGACAAACGTTCTGATTGTTGAAGATGAACAGGCCATCCGCCGCTTTCTGCGCGCCGCGCTGGAAGGCGACGGCCTGCGCGTGTATGAAGCTGAAACATTACAACGTGGTTTACTGGAAGCCGCCACGCGAAAGCCCGATCTGATTATTCTCGATCTCGGCCTGCCGGACGGCGACGGAATCGATTTCATTCGCGACCTGCGTCAGTGGAGCGCAATACCGGTGATTGTCCTTTCCGCCCGCAGCGAAGAAAGCGATAAGATTGCCGCGCTTGACGCCGGAGCTGATGATTACCTGAGCAAGCCATTCGGCATTGGCGAGTTGCAGGCGCGTTTGCGTGTCGCGCTGCGACGGCACGCCGCCAGCCCTAGCGCCGATCCGATCGTCCGTTTTTCCGGC…	MTNVLIVEDEQAIRRFLRAALEGDGLRVYEAETLQRGLLEAATRKPDLIILDLGLPDGDGIDFIRDLRQWSAIPVIVLSARSEESDKIAALDAGADDYLSKPFGIGELQARLRVALRRHAASPSADPIVRFSGVTVDLAARLIHRGDEEIHLTPIEFRLLAVLLNNTGKVLTQRQLLNQVWGPNAVEHSHYLRIYMGHLRQKLEQDPTRPRHFITETGIGYRFMP	MTNVLIVEDEQAIRRFLRTALEGDGMRVFEAETLQRGLLEAATRKPDLIILDLGLPDGDGIEFIRDLRQWSAVPVIVLSARSEESDKIAALDAGADDYLSKPFGIGELQARLRVALRRHSATTAPDPLVKFSDVTVDLAARVIHRGEEEVHLTPIEFRLLAVLLNNAGKVLTQRQLLNQVWGPNAVEHSHYLRIYMGHLRQKLEQDPARPRHFITETGIGYRFML	100	gnl|BL_ORD_ID|2101|hsp_num:0	2331			0	672	kanamycin A
	1_3232 # 3406630 # 3407823 # 1 # ID=1_3232;partial=00;start_type=ATG;rbs_motif=GAGG;rbs_spacer=7bp;gc_cont=0.554	1_3232	3406630	3407823	+	Strict	670	691	Escherichia coli acrA	91.69	3004043	protein homolog model	n/a	n/a	fluoroquinolone antibiotic; cephalosporin; glycylcycline; penam; tetracycline antibiotic; rifamycin antibiotic; phenicol antibiotic; disinfecting agents and antiseptics	antibiotic efflux	resistance-nodulation-cell division (RND) antibiotic efflux pump	ATGAACAAAAACAGAGGGTTAACGCCTCTGGCGGTCGTTCTGATGCTCTCAGGCAGCTTAGCGCTAACAGGATGTGACGACAAACAGGACCAGCAAGGCGGCCAGCAGATGCCAGAAGTTGGAGTTGTCACACTAAAAACGGAACCACTGCAAATCACAACTGAACTTCCGGGTCGTACCGTTGCTTACCGTATCGCCGAAGTTCGCCCACAGGTAAGCGGCATTATCCTGAAGCGTAATTTCGTTGAGGGAAGTGATATCGAAGCGGGAGTCTCTCTCTATCAGATTGATCCTGCGACCTACCAGGCGACTTACGACAGCGCTAAGGGCGATCTGGCAAAAGCGCAGGCCGCCGCGAATATCGCTGAACTGACGGTGAAGCGTTATCAAAAGCTGCTG…	MNKNRGLTPLAVVLMLSGSLALTGCDDKQDQQGGQQMPEVGVVTLKTEPLQITTELPGRTVAYRIAEVRPQVSGIILKRNFVEGSDIEAGVSLYQIDPATYQATYDSAKGDLAKAQAAANIAELTVKRYQKLLGTQYISKQEYDQALADAQQATAAVVAAKAAVETARINLAYTKVTSPISGRIGKSSVTEGALVQNGQASALATVQQLDPIYVDVTQSSNDFLRLKQELANGSLKQENGKAKVDLVTSDGIKFPQSGTLEFSDVTVDQTTGSITLRAIFPNPDHTLLPGMFVRARLQEGTKPTALLVPQQGVTRTPRGDATVLVVGADNKVETRQIVASQAIGDKWLVTDGLKAGDRVVVSGLQKVRPGAQVKVQEITADNKQQAASGDQPAQPRS	MNKNRGFTPLAVVLMLSGSLALTGCDDKQAQQGGQQMPAVGVVTVKTEPLQITTELPGRTSAYRIAEVRPQVSGIILKRNFKEGSDIEAGVSLYQIDPATYQATYDSAKGDLAKAQAAANIAQLTVNRYQKLLGTQYISKQEYDQALADAQQANAAVTAAKAAVETARINLAYTKVTSPISGRIGKSNVTEGALVQNGQATALATVQQLDPIYVDVTQSSNDFLRLKQELANGTLKQENGKAKVSLITSDGIKFPQDGTLEFSDVTVDQTTGSITLRAIFPNPDHTLLPGMFVRARLEEGLNPNAILVPQQGVTRTPRGDATVLVVGADDKVETRPIVASQAIGDKWLVTEGLKAGDRVVISGLQKVRPGVQVKAQEVTADNNQQAASGAQPEQSKS	100	gnl|BL_ORD_ID|2319|hsp_num:0	2661			0	1191	tigecycline; tetracycline; rifampin; chloramphenicol; ampicillin; cefalotin; triclosan
	1_3233 # 3407846 # 3410995 # 1 # ID=1_3233;partial=00;start_type=ATG;rbs_motif=AGGAG;rbs_spacer=10bp;gc_cont=0.543	1_3233	3407846	3410995	+	Strict	1900	1902.5	acrB	94.66	3000216	protein homolog model	n/a	n/a	fluoroquinolone antibiotic; cephalosporin; glycylcycline; penam; tetracycline antibiotic; rifamycin antibiotic; phenicol antibiotic; disinfecting agents and antiseptics	antibiotic efflux	resistance-nodulation-cell division (RND) antibiotic efflux pump	ATGCCTAATTTCTTTATCGATCGCCCTATATTTGCGTGGGTGATCGCCATCATCATCATGTTGGCAGGGGGGCTCGCGATCCTCAAATTGCCGGTAGCGCAATATCCGACGATTGCGCCACCAGCAGTGACGATCTCCGCAACCTACCCTGGCGCTGATGCGAAAACGGTACAGGATACCGTCACGCAGGTTATCGAACAGAATATGAACGGTATCGATAACCTGATGTATATGTCCTCCAACAGTGACTCCACGGGGACCGTGCAGATCACGCTGACCTTTGAATCCGGCACCGATGCGGATATCGCGCAGGTTCAGGTTCAGAACAAGTTGCAACTGGCAATGCCTTTACTTCCCCAGGAAGTACAGCAACAGGGCGTGAGCGTTGAGAAGTCCTCA…	MPNFFIDRPIFAWVIAIIIMLAGGLAILKLPVAQYPTIAPPAVTISATYPGADAKTVQDTVTQVIEQNMNGIDNLMYMSSNSDSTGTVQITLTFESGTDADIAQVQVQNKLQLAMPLLPQEVQQQGVSVEKSSSSFLMVVGVINTDGTMTQEDISDYVAANMKDPISRTSGVGDVQLFGSQYAMRIWMNPTELTKYQLTPVDVINAIKAQNAQVAAGQLGGTPPVKGQQLNASIIAQTRLTSTDEFGKILLKVNQDGSQVRLRDVAKIELGGENYDVIAKFNGQPASGLGIKLATGANALDTATAIRAELKKMEPFFPPGMKIVYPYDTTPFVKISIHEVVKTLVEAIILVFLVMYLFLQNFRATLIPTIAVPVVLLGTFAVLAAFGFSINTLTMFGMV…	MPNFFIDRPIFAWVIAIIIMLAGGLAILKLPVAQYPTIAPPAVTISASYPGADAKTVQDTVTQVIEQNMNGIDNLMYMSSNSDSTGTVQITLTFESGTDADIAQVQVQNKLQLAMPLLPQEVQQQGVSVEKSSSSFLMVVGVINTDGTMTQEDISDYVAANMKDAISRTSGVGDVQLFGSQYAMRIWMNPNELNKFQLTPVDVITAIKAQNAQVAAGQLGGTPPVKGQQLNASIIAQTRLTSTEEFGKILLKVNQDGSRVLLRDVAKIELGGENYDIIAEFNGQPASGLGIKLATGANALDTAAAIRAELAKMEPFFPSGLKIVYPYDTTPFVKISIHEVVKTLVEAIILVFLVMYLFLQNFRATLIPTIAVPVVLLGTFAVLAAFGFSINTLTMFGMV…	100	gnl|BL_ORD_ID|1011|hsp_num:0	1104			0	3144	tigecycline; acriflavine; tetracycline; rifampin; chloramphenicol; ampicillin; cefalotin; triclosan
	1_3328 # 3505576 # 3506688 # 1 # ID=1_3328;partial=00;start_type=ATG;rbs_motif=None;rbs_spacer=None;gc_cont=0.517	1_3328	3505576	3506688	+	Strict	250	261.2	vanG	38.87	3002909	protein homolog model	n/a	n/a	glycopeptide antibiotic	antibiotic target alteration	glycopeptide resistance gene cluster; Van ligase	ATGGAATGGGTTTTTAAGATGGCGAAATTGCGGGTAGGAATAGTATTTGGCGGTAAGTCGGCGGAACATGAAGTGTCTTTGCAATCAGCGAAAAATATCGTTGATGCGATCGATAAAACCCGCTTCGACGTGGTGCTGTTAGGGATAGATAAGGCGGGACAATGGCATGTTAACGATGCGGAAAATTATTTGCAGAATGCAGACGATCCGGCACATATCGCGCTACGTCCTTCGGCAATCAGTCTGGCCCAGGTGCCTGGCAAACATCAACACCAATTGATTAACGCCCAGAACGGGCAGCCGCTACCGACGGTAGATGTTATTTTTCCTATCGTCCACGGTACGCTGGGCGAAGACGGCTCATTGCAGGGGATGCTGCGCGTCGCAAACTTACCGTTT…	MEWVFKMAKLRVGIVFGGKSAEHEVSLQSAKNIVDAIDKTRFDVVLLGIDKAGQWHVNDAENYLQNADDPAHIALRPSAISLAQVPGKHQHQLINAQNGQPLPTVDVIFPIVHGTLGEDGSLQGMLRVANLPFVGSDVLSSAACMDKDIAKRLLRDAGLNIAPFITLTRTNRHAFSFAEVESRLGLPLFVKPANQGSSVGVSKVANEAQYQQAVALAFEFDHKVVVEQGIKGREIECAVLGNDNPQASTCGEIVLNSEFYAYDTKYIDDNGAQVVVPAQLPSGVNDKIRAIAIQAYQTLGCAGMARVDVFLTADNEVVINEINTLPGFTNISMYPKLWQASGLGYTDLISRLIELALERHTANNALKTTM	MQNKKIAVIFGGNSTEYEVSLQSASAVFENINTNKFDIIPIGITRSGEWYHYTGEKEKILNNTWFEDSKNLCPVVVSQNRSVKGFLEIASDKYRIIKVDLVFPVLHGKNGEDGTLQGIFELAGIPVVGCDTLSSALCMDKDRAHKLVSLAGISVPKSVTFKRFNEEAAMKEIEANLTYPLFIKPVRAGSSFGITKVIEKQELDAAIELAFEHDTEVIVEETINGFEVGCAVLGIDELIVGRVDEIELSSGFFDYTEKYTLKSSKIYMPARIDAEAEKRIQEAAVTIYKALGCSGFSRVDMFYTPSGEIVFNEVNTIPGFTSHSRYPNMMKGIGLSFSQMLDKLIGLYVE	106.02	gnl|BL_ORD_ID|1069|hsp_num:0	1157			0	1047	vancomycin
	1_3354 # 3538984 # 3539448 # -1 # ID=1_3354;partial=00;start_type=ATG;rbs_motif=AGGAG;rbs_spacer=7bp;gc_cont=0.544	1_3354	3538984	3539448	-	Perfect	290	310.1	golS	100	3000504	protein homolog model	n/a	n/a	monobactam; carbapenem; cephalosporin; cephamycin; penam; phenicol antibiotic; penem	antibiotic efflux	resistance-nodulation-cell division (RND) antibiotic efflux pump	ATGAACATCGGTAAAGCAGCTAAAGCATCGAAAGTCTCGGCCAAAATGATTCGCTACTATGAACAGATTGGTCTGATTCCCGCGGCAAGTCGGACGGATTCCGGCTATCGGGCCTATACCCAGGCTGATGTTAATCAATTGCATTTTATACGCCGCGCGCGCGACCTCGGTTTTTCAGTTGCTGAAATCAGCGACTTACTGAATCTTTGGAATAACCAGTCGCGGCAAAGCGCTGACGTCAAACGCCTGGCGCAGACGCACATTGATGAACTGGACAGACGTATCCAGAACATGCAGCACATGGCGCAAACCCTCAAAGCGCTGATTCACTGCTGCGCCGGCGACGCGCTGCCAGATTGTCCCATTCTGCATACGCTTGGACAACCTGACGATAGCGAG…	MNIGKAAKASKVSAKMIRYYEQIGLIPAASRTDSGYRAYTQADVNQLHFIRRARDLGFSVAEISDLLNLWNNQSRQSADVKRLAQTHIDELDRRIQNMQHMAQTLKALIHCCAGDALPDCPILHTLGQPDDSEPEARTGAVLRRPRRHGLAKRL	MNIGKAAKASKVSAKMIRYYEQIGLIPAASRTDSGYRAYTQADVNQLHFIRRARDLGFSVAEISDLLNLWNNQSRQSADVKRLAQTHIDELDRRIQNMQHMAQTLKALIHCCAGDALPDCPILHTLGQPDDSEPEARTGAVLRRPRRHGLAKRL	100	gnl|BL_ORD_ID|36|hsp_num:0	44			0	462	chloramphenicol
	1_3357 # 3543248 # 3546415 # 1 # ID=1_3357;partial=00;start_type=ATG;rbs_motif=AGG;rbs_spacer=10bp;gc_cont=0.567	1_3357	3543248	3546415	+	Strict	750	1209.9	adeF	60.67	3000777	protein homolog model	n/a	n/a	fluoroquinolone antibiotic; tetracycline antibiotic	antibiotic efflux	resistance-nodulation-cell division (RND) antibiotic efflux pump	ATGAAATTCACCCACTTTTTCATTGCACGACCCATCTTCGCCATCGTCCTGTCGCTGTTAATGCTGCTGGCTGGCGCTATCGCCTTTTTAAAACTGCCGCTGAGTGAATATCCGGCCGTTACGCCGCCCACGGTACAGGTTAGCGCCAGCTACCCCGGCGCTAACCCGCAAGTGATTGCCGATACGGTAGCCGCGCCGCTGGAACAGGTGATCAACGGCGTTGACGGCATGTTGTATATGAATACCCAGATGGCCATTGATGGTCGCATGGTTATCTCTATCGCCTTCGAACAGGGAACCGATCCTGATATGGCGCAAATTCAGGTGCAAAACCGGGTATCCCGCGCGCTGCCTCGCCTGCCCGAAGAAGTCCAGCGAATTGGCGTTGTAACGGAGAAA…	MKFTHFFIARPIFAIVLSLLMLLAGAIAFLKLPLSEYPAVTPPTVQVSASYPGANPQVIADTVAAPLEQVINGVDGMLYMNTQMAIDGRMVISIAFEQGTDPDMAQIQVQNRVSRALPRLPEEVQRIGVVTEKTSPDMLMVVHLVSPQKRYDSLYLSNFAIRQVRDELARLPGVGDVLVWGAGEYAMRVWLDPAKIANRGLTASDIVTALREQNVQVAAGSVGQQPEASAAFQMTVNTLGRLTSEEQFGEIVVKIGADGEVTRLRDVARVTLGADAYTLRSLLNGEAAPALQIIQSPGANAIDVSNAIRGKMDELQQNFPQDIEYRIAYDPTVFVRASLQSVAITLLEALVLVVLVVVLFLQTWRASIIPLVAVPVSLVGTFALMHLFGFSLNTLSLFG…	MNISKFFIDRPIFAGVLSVLILLAGLLSVFQLPISEYPEVVPPSVVVRAQYPGANPKVIAETVASPLEESINGVEDMLYMQSQANSDGNLTITVNFKLGIDPDKAQQLVQNRVSQAMPRLPEDVQRLGVTTLKSSPTLTMVVHLTSPDNRYDMTYLRNYAVLNVKDRLARLQGVGEVGLFGSGDYAMRVWLDPQKVAQRNLTATEIVNAIREQNIQVAAGTIGASPSNSPLQLSVNAQGRLTTEQEFADIILKTAPDGAVTRLGDVARVELAASQYGLRSLLDNKQAVAIPIFQAPGANALQVSDQVRSTMKELSKDFPSSIKYDIVYDPTQFVRASIKAVVHTLLEAITLVVVVVILFLQTWRASIIPLLAVPVSIIGTFALMLAFGYSINALSLFGM…	99.62	gnl|BL_ORD_ID|133|hsp_num:0	153			0	3126	tetracycline
	1_3572 # 3784416 # 3785360 # -1 # ID=1_3572;partial=00;start_type=ATG;rbs_motif=GGAG;rbs_spacer=6bp;gc_cont=0.476	1_3572	3784416	3785360	-	Strict	500	562	leuO	86.62	3003843	protein homolog model	n/a	n/a	nucleoside antibiotic; disinfecting agents and antiseptics	antibiotic efflux	major facilitator superfamily (MFS) antibiotic efflux pump	ATGCCAGAGGTCAAAACCGAAAAGCCGCATCTTTTAGATATGGGCAAACCACAGCTTCGCATGGTTGATTTGAACCTATTGACCGTGTTCGATGCGGTAATGCAAGAGCAGAATATTACGCGCGCCGCCCACACGCTGGGAATGTCGCAGCCTGCGGTCAGTAACGCCGTAGCGCGTCTGAAGGTTATGTTTAATGACGAACTTTTTGTTCGATATGGACGAGGAATTCAGCCGACTGCCCGTGCATTTCAGTTATTTGGTTCAGTCCGTCAGGCGTTACAATTGGTGCAAAATGAATTGCCGGGATCGGGGTTTGAGCCGACCAGCAGCGAACGTGTATTCAATCTTTGCGTGTGCAGTCCGCTGGATAATATCCTGACGTCACAGATTTATAATCGT…	MPEVKTEKPHLLDMGKPQLRMVDLNLLTVFDAVMQEQNITRAAHTLGMSQPAVSNAVARLKVMFNDELFVRYGRGIQPTARAFQLFGSVRQALQLVQNELPGSGFEPTSSERVFNLCVCSPLDNILTSQIYNRVEKIAPNIHVVFKASLNQNTEHQLRYQETEFVISYEEFRRPEFTSVPLFKDEMVLVASRKHPRISGPLLEGDVYNEQHAVVSLDRYASFSQPWYDTPDKQSSVAYQGMVLISVLNVVSQTHLVAIAPRWLAEEFAESLDLQILPLPLKLNSRTCYLSWHEAAGRDKGHQWMEDLLVSVCKR	MPEVQTDHPETAELSKPQLRMVDLNLLTVFDAVMQEQNITRAAHALGMSQPAVSNAVARLKVMFNDELFVRYGRGIQPTARAFQLFGSVRQALQLVQNELPGSGFEPASSERVFHLCVCSPLDSILTSQIYNHIEQIAPNIHVMFKSSLNQNTEHQLRYQETEFVISYEDFHRPEFTSVPLFKDEMVLVASKNHPTIKGPLLKHDVYNEQHAAVSLDRFASFSQTWYDTVDKQASIAYQGMAMMSVLSVVSQTHLVAIAPRWLAEEFAESLELQVLPLPLKQNSRTCYLSWHEAAGRDKGHQWMEEQLVSICKR	100	gnl|BL_ORD_ID|4919|hsp_num:0	5921			0	942	acriflavine; puromycin
	3_11 # 7019 # 7879 # -1 # ID=3_11;partial=00;start_type=ATG;rbs_motif=AGGA;rbs_spacer=5bp;gc_cont=0.490	3_11	7019	7879	-	Perfect	500	571.2	TEM-135	100	3000999	protein homolog model	n/a	n/a	monobactam; cephalosporin; penam; penem	antibiotic inactivation	TEM beta-lactamase	ATGAGTATTCAACATTTTCGTGTCGCCCTTATTCCCTTTTTTGCGGCATTTTGCCTTCCTGTTTTTGCTCACCCAGAAACGCTGGTGAAAGTAAAAGATGCTGAAGATCAGTTGGGTGCACGAGTGGGTTACATCGAACTGGATCTCAACAGCGGTAAGATCCTTGAGAGTTTTCGCCCCGAAGAACGTTTTCCAATGATGAGCACTTTTAAAGTTCTGCTATGTGGTGCGGTATTATCCCGTGTTGACGCCGGGCAAGAGCAACTCGGTCGCCGCATACACTATTCTCAGAATGACTTGGTTGAGTACTCACCAGTCACAGAAAAGCATCTTACGGATGGCATGACAGTAAGAGAATTATGCAGTGCTGCCATAACCATGAGTGATAACACTGCTGCC…	MSIQHFRVALIPFFAAFCLPVFAHPETLVKVKDAEDQLGARVGYIELDLNSGKILESFRPEERFPMMSTFKVLLCGAVLSRVDAGQEQLGRRIHYSQNDLVEYSPVTEKHLTDGMTVRELCSAAITMSDNTAANLLLTTIGGPKELTAFLHNMGDHVTRLDRWEPELNEAIPNDERDTTTPAAMATTLRKLLTGELLTLASRQQLIDWMEADKVAGPLLRSALPAGWFIADKSGAGERGSRGIIAALGPDGKPSRIVVIYTTGSQATMDERNRQIAEIGASLIKHW	MSIQHFRVALIPFFAAFCLPVFAHPETLVKVKDAEDQLGARVGYIELDLNSGKILESFRPEERFPMMSTFKVLLCGAVLSRVDAGQEQLGRRIHYSQNDLVEYSPVTEKHLTDGMTVRELCSAAITMSDNTAANLLLTTIGGPKELTAFLHNMGDHVTRLDRWEPELNEAIPNDERDTTTPAAMATTLRKLLTGELLTLASRQQLIDWMEADKVAGPLLRSALPAGWFIADKSGAGERGSRGIIAALGPDGKPSRIVVIYTTGSQATMDERNRQIAEIGASLIKHW	100	gnl|BL_ORD_ID|1558|hsp_num:0	1697			0	858	penicillin; ampicillin
	1_54 # 57532 # 58923 # 1 # ID=1_54;partial=00;start_type=ATG;rbs_motif=AGGAG;rbs_spacer=6bp;gc_cont=0.552	1_54	57532	58923	+	Strict	850	867.1	Escherichia coli UhpT with mutation conferring resistance to fosfomycin	95.68	3003890	protein variant model	E350Q	n/a	phosphonic acid antibiotic	antibiotic target alteration	antibiotic-resistant UhpT	ATGCTGGCCTTCTTAAACCAGGTGCGCAAGCCGACCCTGGATCTGCCGCTCGATGTGCGGCGTAAAATGTGGTTCAAGCCGTTCATGCAGTCCTATCTGGTGGTTTTTATCGGCTACCTGACCATGTACCTGATCCGCAAAAACTTTAACATCGCGCAGAACGACATGATTTCTACCTACGGGTTGAGCATGACCGAGCTGGGGATGATTGGCCTGGGCTTCTCGATCACCTACGGCGTGGGGAAAACGCTGGTTTCCTACTACGCTGACGGTAAAAATACCAAGCAGTTTCTACCGTTTATGTTGATCCTCTCCGCTATCTGTATGCTCGGCTTCAGCGCCAGCATGGGCGCGGGGTCAACCAGTCTGTTTCTGATGATCGCTTTCTATGCCCTGAGC…	MLAFLNQVRKPTLDLPLDVRRKMWFKPFMQSYLVVFIGYLTMYLIRKNFNIAQNDMISTYGLSMTELGMIGLGFSITYGVGKTLVSYYADGKNTKQFLPFMLILSAICMLGFSASMGAGSTSLFLMIAFYALSGFFQSTGGSCSYSTITKWTPRRKRGTFLGFWNISHNLGGAGAAGVALFGANYLFDGHVIGMFIFPSIIALIVGFIGLRFGSDSPESYGLGKAEELFGEEISEEDKETEENEMTKWQIFVEYVLKNKVIWLLCFSNIFLYVVRIGIDQWSTVYAFQELKLSKEVAIQGFTLFEVGALVGTLLWGWLSDLANGRRALVACVALALIIATLGVYQHASNQYVYLASLFALGFLVFGPQLLIGVAAVGFVPKKAIGAADGIKGTFAYLIG…	MLAFLNQVRKPTLDLPLEVRRKMWFKPFMQSYLVVFIGYLTMYLIRKNFNIAQNDMISTYGLSMTQLGMIGLGFSITYGVGKTLVSYYADGKNTKQFLPFMLILSAICMLGFSASMGSGSVSLFLMIAFYALSGFFQSTGGSCSYSTITKWTPRRKRGTFLGFWNISHNLGGAGAAGVALFGANYLFDGHVIGMFIFPSIIALIVGFIGLRYGSDSPESYGLGKAEELFGEEISEEDKETESTDMTKWQIFVEYVLKNKVIWLLCFANIFLYVVRIGIDQWSTVYAFQELKLSKAVAIQGFTLFEAGALVGTLLWGWLSDLANGRRGLVACIALALIIATLGVYQHASNEYIYLASLFALGFLVFGPQLLIGVAAVGFVPKKAIGAADGIKGTFAYLIG…	100	gnl|BL_ORD_ID|2126|hsp_num:0	2373			0	1389	fosfomycin
	1_390 # 438579 # 439763 # 1 # ID=1_390;partial=00;start_type=GTG;rbs_motif=AGGA;rbs_spacer=8bp;gc_cont=0.542	1_390	438579	439763	+	Strict	700	786.9	Escherichia coli EF-Tu mutants conferring resistance to Pulvomycin	99.49	3003369	protein variant model	R234F	n/a	elfamycin antibiotic	antibiotic target alteration	elfamycin resistant EF-Tu	GTGTCTAAAGAAAAATTTGAACGTACAAAACCGCACGTTAACGTCGGCACCATCGGCCACGTTGACCACGGTAAAACTACCCTGACCGCTGCAATCACCACCGTACTGGCTAAAACCTACGGCGGTGCTGCTCGTGCATTCGACCAGATCGATAACGCGCCGGAAGAAAAAGCGCGTGGTATCACCATCAACACTTCTCACGTTGAATACGATACCCCGACCCGCCACTACGCACACGTAGACTGCCCGGGGCACGCCGACTATGTTAAAAACATGATCACCGGTGCTGCTCAGATGGACGGCGCGATTCTGGTTGTTGCTGCGACTGACGGCCCGATGCCGCAGACCCGTGAGCACATCCTGCTGGGTCGTCAGGTAGGCGTTCCGTACATCATCGTG…	MSKEKFERTKPHVNVGTIGHVDHGKTTLTAAITTVLAKTYGGAARAFDQIDNAPEEKARGITINTSHVEYDTPTRHYAHVDCPGHADYVKNMITGAAQMDGAILVVAATDGPMPQTREHILLGRQVGVPYIIVFLNKCDMVDDEELLELVEMEVRELLSQYDFPGDDTPIVRGSALKALEGDAEWEAKIIELAGFLDSYIPEPERAIDKPFLLPIEDVFSISGRGTVVTGRVERGIIKVGEEVEIVGIKETQKSTCTGVEMFRKLLDEGRAGENVGVLLRGIKREEIERGQVLAKPGTIKPHTKFESEVYILSKDEGGRHTPFFKGYRPQFYFRTTDVTGTIELPEGVEMVMPGDNIKMVVTLIHPIAMDDGLRFAIREGGRTVGAGVVAKVLG	MLSPEGESTIVRNIAVSKEKFERTKPHVNVGTIGHVDHGKTTLTAAITTVLAKTYGGAARAFDQIDNAPEEKARGITINTSHVEYDTPTRHYAHVDCPGHADYVKNMITGAAQMDGAILVVAATDGPMPQTREHILLGRQVGVPYIIVFLNKCDMVDDEELLELVEMEVRELLSQYDFPGDDTPIVRGSALKALEGDAEWEAKILELAGFLDSYIPEPERAIDKPFLLPIEDVFSISGRGTVVTGRVERGIIKVGEEVEIVGIKETQKSTCTGVEMFRKLLDEGRAGENVGVLLRGIKREEIERGQVLAKPGTIKPHTKFESEVYILSKDEGGRHTPFFKGYRPQFYFRTTDVTGTIELPEGVEMVMPGDNIKMVVTLIHPIAMDDGLRFAIREGGRTV…	96.33	gnl|BL_ORD_ID|1969|hsp_num:0	2158			45	1227	pulvomycin
	1_1411 # 1535600 # 1536958 # 1 # ID=1_1411;partial=00;start_type=ATG;rbs_motif=GGAG;rbs_spacer=8bp;gc_cont=0.548	1_1411	1535600	1536958	+	Strict	850	898.7	Escherichia coli GlpT with mutation conferring resistance to fosfomycin	96.9	3003889	protein variant model	E448K	n/a	phosphonic acid antibiotic	antibiotic target alteration	antibiotic-resistant GlpT	ATGTTGAGTATTTTTAAACCAGCGCCGCATAAAGCGCGCTTGCCAGCGGCGGAGATTGATCCGACCTATCGCCGATTACGCTGGCAGATTTTCCTGGGGATATTCTTTGGCTATGCCGCGTATTATCTGGTGCGCAAGAACTTTGCCCTCGCGATGCCCTACCTGGTAGAACAGGGTTTTTCACGCGGCGATCTGGGCTTTGCGTTGTCCGGGATTTCCATCGCTTATGGTTTTTCGAAATTTATAATGGGTTCGGTGTCCGATCGCTCGAATCCGCGCGTTTTTCTGCCGGCAGGGTTGATTCTGGCCGCAGCAGTCATGTTGTTTATGGGCTTTGTGCCGTGGGCGACATCCAGCATCGCCGTGATGTTTGTGCTGTTGTTCCTTTGCGGCTGGTTC…	MLSIFKPAPHKARLPAAEIDPTYRRLRWQIFLGIFFGYAAYYLVRKNFALAMPYLVEQGFSRGDLGFALSGISIAYGFSKFIMGSVSDRSNPRVFLPAGLILAAAVMLFMGFVPWATSSIAVMFVLLFLCGWFQGMGWPPCGRTMVHWWSQKERGGIVSVWNCAHNVGGGIPPLLFLLGMAWFNDWKAALYMPAFGAIVVALFAFAMMRDTPQSCGLPPIEEYKNDYPDDYNEKAEEELTAKQIFMQYVLPNKLLWYIAIANVFVYLLRYGILDWSPTYLKEVKHFALDKSSWAYFLYEYAGIPGTLLCGWMSDKVFRGNRGATGVFFMTLVTIATIVYWMNPAGNPNVDMACMIIIGFLIYGPVMLIGLHALELAPKKAAGTAAGFTGLFGYLGGSVA…	MLSIFKPAPHKARLPAAEIDPTYRRLRWQIFLGIFFGYAAYYLVRKNFALAMPYLVEQGFSRGDLGFALSGISIAYGFSKFIMGSVSDRSNPRVFLPAGLILAAAVMLFMGFVPWATSSIAVMFVLLFLCGWFQGMGWPPCGRTMVHWWSQKERGGIVSVWNCAHNVGGGIPPLLFLLGMAWFNDWHAALYMPAFCAILVALFAFAMMRDTPQSCGLPPIEEYKNDYPDDYNEKAEQELTAKQIFMQYVLPNKLLWYIAIANVFVYLLRYGILDWSPTYLKEVKHFALDKSSWAYFLYEYAGIPGTLLCGWMSDKVFRGNRGATGVFFMTLVTIATIVYWMNPAGNPTVDMICMIVIGFLIYGPVMLIGLHALELAPKKAAGTAAGFTGLFGYLGGSVA…	100	gnl|BL_ORD_ID|2127|hsp_num:0	2372			0	1356	fosfomycin
	1_1422 # 1549216 # 1551852 # 1 # ID=1_1422;partial=00;start_type=ATG;rbs_motif=GGA;rbs_spacer=10bp;gc_cont=0.559	1_1422	1549216	1551852	+	Strict	1500	1679.5	Salmonella enterica gyrA conferring resistance to fluoroquinolones	99.89	3003926	protein variant model	D87Y	D87Y:1545	fluoroquinolone antibiotic	antibiotic target alteration	fluoroquinolone resistant gyrA	ATGAGCGACCTTGCGAGAGAAATTACACCGGTCAACATTGAGGAAGAGCTGAAAAGCTCCTATCTGGATTATGCGATGTCGGTCATTGTTGGCCGTGCGCTGCCGGATGTCCGAGATGGCCTGAAGCCGGTACACCGTCGCGTACTTTACGCCATGAACGTATTGGGCAATGACTGGAACAAAGCCTATAAAAAATCTGCCCGTGTCGTTGGTGACGTAATCGGTAAATACCATCCCCACGGCGATTCCGCAGTGTATTACACCATCGTTCGTATGGCGCAGCCATTCTCGCTGCGTTACATGCTGGTGGATGGTCAGGGTAACTTCGGTTCTATTGACGGCGACTCCGCGGCGGCAATGCGTTATACGGAGATCCGTCTGGCGAAAATCGCCCACGAA…	MSDLAREITPVNIEEELKSSYLDYAMSVIVGRALPDVRDGLKPVHRRVLYAMNVLGNDWNKAYKKSARVVGDVIGKYHPHGDSAVYYTIVRMAQPFSLRYMLVDGQGNFGSIDGDSAAAMRYTEIRLAKIAHELMADLEKETVDFVDNYDGTEKIPDVMPTKIPNLLVNGSSGIAVGMATNIPPHNLTEVINGCLAYIDNEDISIEGLMEHIPGPDFPTAAIINGRRGIEEAYRTGRGKVYIRARAEVEADAKTGRETIIVHEIPYQVNKARLIEKIAELVKDKRVEGISALRDESDKDGMRIVIEVKRDAVGEVVLNNLYSQTQLQVSFGINMVALHHGQPKIMNLKDIISAFVRHRREVVTRRTIFELRKARDRAHILEALAIALANIDPIIELIRR…	MSDLAREITPVNIEEELKSSYLDYAMSVIVGRALPDVRDGLKPVHRRVLYAMNVLGNDWNKAYKKSARVVGDVIGKYHPHGDSAVYDTIVRMAQPFSLRYMLVDGQGNFGSIDGDSAAAMRYTEIRLAKIAHELMADLEKETVDFVDNYDGTEKIPDVMPTKIPNLLVNGSSGIAVGMATNIPPHNLTEVINGCLAYIDNEDISIEGLMEHIPGPDFPTAAIINGRRGIEEAYRTGRGKVYIRARAEVEADAKTGRETIIVHEIPYQVNKARLIEKIAELVKDKRVEGISALRDESDKDGMRIVIEVKRDAVGEVVLNNLYSQTQLQVSFGINMVALHHGQPKIMNLKDIISAFVRHRREVVTRRTIFELRKARDRAHILEALAIALANIDPIIELIRR…	100	gnl|BL_ORD_ID|2156|hsp_num:0	2403			0	2634	ciprofloxacin; nalidixic acid
	1_3565 # 3776437 # 3778203 # -1 # ID=1_3565;partial=00;start_type=ATG;rbs_motif=AGGA;rbs_spacer=12bp;gc_cont=0.547	1_3565	3776437	3778203	-	Strict	500	564.7	Haemophilus influenzae PBP3 conferring resistance to beta-lactam antibiotics	51.85	3004446	protein variant model	D350N, S357N	n/a	cephalosporin; cephamycin; penam	antibiotic target alteration	Penicillin-binding protein mutations conferring resistance to beta-lactam antibiotics	ATGAAAGCAGCGGCAAAAACGCAAAAATCGAAACGCCAGGAAGAACAGACCAACTTCATCAGTTGGCGTTTTGCGTTGCTGTGCGGCTGTATTTTACTGGCGCTGGTTTTTTTACTTGGACGCGCGGCGTGGCTACAGATTATCGCCCCGGATATGCTGGTGCGTCAGGGCGATATGCGTTCGCTGCGTGTTCAGGAAGTCTCCACCTCACGCGGTATGATTACCGACCGTTCCGGGCGTCCACTGGCGGTCAGCGTACCGGTTAAGGCGATCTGGGCCGACCCGAAAGAAGTTCATGACGCCGGCGGCATCAGCGTTGGCGATCGCTGGAAAGCGCTTTCTACTGCGCTCAATATTCCGCTCGATCAGCTCTCCGCCCGTATCAACGCCAACCCGAAA…	MKAAAKTQKSKRQEEQTNFISWRFALLCGCILLALVFLLGRAAWLQIIAPDMLVRQGDMRSLRVQEVSTSRGMITDRSGRPLAVSVPVKAIWADPKEVHDAGGISVGDRWKALSTALNIPLDQLSARINANPKGRFIYLARQVNPDMADYIKKLKLPGIHLREESRRYYPSGEVTAHLIGFTNVDSQGIEGVEKSFDKWLTGQPGERIVRKDRYGRVIEDISSTDSQAAHNLALSIDERLQALVYRELNNAVAFNKAESGSAVLVDVNTGEVLAMANSPSYNPNNLAGTPKDAMRNRTITDVFEPGSTVKPMVVMTALQRGIVNENTVLNTVPYRINGHEIKDVARYSELTLTGVLQKSSNVGVSKLALAMPSSALVDTYSRFGLGKATNLGLVGERSG…	MVKFNSSRKSGKSKKTIRKLTAPETVKQNKPQKVFEKCFMRGRYMLSTVLILLGLCALVARAAYVQSINADTLSNEADKRSLRKDEVLSVRGSILDRNGQLLSVSVPMSAIVADPKTMLKENSLADKERIAALAEELGMTENDLVKKIEKNSKSGYLYLARQVELSKANYIRRLKIKGIILETEHRRFYPRVEEAAHVVGYTDIDGNGIEGIEKSFNSLLVGKDGSRTVRKDKRGNIVAHISDEKKYDAQDVTLSIDEKLQSMVYREIKKAVSENNAESGTAVLVDVRTGEVLAMATAPSYNPNNRVGVKSELMRNRAITDTFEPGSTVKPFVVLTALQRGVVKRDEIIDTTSFKLSGKEIVDVAPRAQQTLDEILMNSSNRGVSRLALRMPPSALMET…	96.39	gnl|BL_ORD_ID|2491|hsp_num:0	2886			63	1758	ceftriaxone; ampicillin; cefaclor; cefotaxime; cefditoren; cefdinir
	1_4096 # 4371328 # 4372512 # -1 # ID=1_4096;partial=00;start_type=ATG;rbs_motif=GAGG;rbs_spacer=8bp;gc_cont=0.540	1_4096	4371328	4372512	-	Strict	700	786.9	Escherichia coli EF-Tu mutants conferring resistance to Pulvomycin	99.49	3003369	protein variant model	R234F	n/a	elfamycin antibiotic	antibiotic target alteration	elfamycin resistant EF-Tu	ATGTCTAAAGAAAAGTTTGAACGTACAAAACCGCACGTTAACGTCGGTACTATCGGCCACGTTGACCATGGTAAAACAACGCTGACCGCTGCCATTACTACCGTACTGGCTAAAACCTACGGCGGTGCCGCCCGCGCATTCGACCAGATCGATAACGCGCCGGAAGAAAAAGCGCGTGGTATCACCATCAACACTTCTCACGTTGAATACGATACCCCGACCCGCCACTACGCACACGTAGACTGCCCGGGGCACGCCGACTATGTTAAAAACATGATCACCGGTGCTGCTCAGATGGACGGCGCGATTCTGGTTGTTGCTGCGACTGACGGCCCGATGCCGCAGACCCGTGAGCACATCCTGCTGGGTCGTCAGGTAGGCGTTCCGTACATCATCGTG…	MSKEKFERTKPHVNVGTIGHVDHGKTTLTAAITTVLAKTYGGAARAFDQIDNAPEEKARGITINTSHVEYDTPTRHYAHVDCPGHADYVKNMITGAAQMDGAILVVAATDGPMPQTREHILLGRQVGVPYIIVFLNKCDMVDDEELLELVEMEVRELLSQYDFPGDDTPIVRGSALKALEGDAEWEAKIIELAGFLDSYIPEPERAIDKPFLLPIEDVFSISGRGTVVTGRVERGIIKVGEEVEIVGIKETQKSTCTGVEMFRKLLDEGRAGENVGVLLRGIKREEIERGQVLAKPGTIKPHTKFESEVYILSKDEGGRHTPFFKGYRPQFYFRTTDVTGTIELPEGVEMVMPGDNIKMVVTLIHPIAMDDGLRFAIREGGRTVGAGVVAKVLG	MLSPEGESTIVRNIAVSKEKFERTKPHVNVGTIGHVDHGKTTLTAAITTVLAKTYGGAARAFDQIDNAPEEKARGITINTSHVEYDTPTRHYAHVDCPGHADYVKNMITGAAQMDGAILVVAATDGPMPQTREHILLGRQVGVPYIIVFLNKCDMVDDEELLELVEMEVRELLSQYDFPGDDTPIVRGSALKALEGDAEWEAKILELAGFLDSYIPEPERAIDKPFLLPIEDVFSISGRGTVVTGRVERGIIKVGEEVEIVGIKETQKSTCTGVEMFRKLLDEGRAGENVGVLLRGIKREEIERGQVLAKPGTIKPHTKFESEVYILSKDEGGRHTPFFKGYRPQFYFRTTDVTGTIELPEGVEMVMPGDNIKMVVTLIHPIAMDDGLRFAIREGGRTV…	96.33	gnl|BL_ORD_ID|1969|hsp_num:0	2158			45	1227	pulvomycin
	1_1549 # 1689763 # 1690485 # -1 # ID=1_1549;partial=00;start_type=ATG;rbs_motif=GAG;rbs_spacer=6bp;gc_cont=0.537	1_1549	1689763	1690485	-	Strict	450	456.8	baeR	94.14	3000828	protein overexpression model	n/a	n/a	aminoglycoside antibiotic; aminocoumarin antibiotic	antibiotic efflux	resistance-nodulation-cell division (RND) antibiotic efflux pump	ATGACTGAATTACCCATTGATGAAAACACGCCGCGCATTTTGATTGTTGAAGATGAACCCAAGCTGGGTCAGCTGCTTATTGACTACTTACGCGCGGCGAGTTACGCCCCCACGCTCATCAATCACGGCGACAAGGTACTGCCGTATGTGCGTCAAACGCCGCCGGATCTGATTCTGCTGGATCTGATGCTGCCGGGTACCGATGGTCTGACGCTATGCCGGGAGATTCGCCGTTTTTCCGACATCCCCATTGTGATGGTCACAGCCAAAATTGAAGAGATCGACCGGCTGCTGGGGCTGGAAATCGGCGCCGATGATTATATCTGTAAGCCTTACAGCCCGCGCGAAGTCGTGGCCCGCGTGAAAACCATTTTGCGCCGCTGTAAACCGCAGCGCGAA…	MTELPIDENTPRILIVEDEPKLGQLLIDYLRAASYAPTLINHGDKVLPYVRQTPPDLILLDLMLPGTDGLTLCREIRRFSDIPIVMVTAKIEEIDRLLGLEIGADDYICKPYSPREVVARVKTILRRCKPQRELQQQDAESPLMIDESRFQASWCGKALDLTPAEFRLLKTLSLEPGKVFSREQLLNHLYDDYRVVTDRTIDSHIKNLRRKLESLDAEQSFIRAVYGVGYRWEADACRLV	MTELPIDENTPRILIVEDEPKLGQLLIDYLRAASYAPSLISHGDQVLPYVRQTPPDLILLDLMLPGTDGLTLCREIRRFSDVPIVMVTAKIEEIDRLLGLEIGADDYICKPYSPREVVARVKTILRRCKPQRELQVLDAESPLIVDESRFQASWRSKLLDLTPAEFRLLKTLSHEPGKVFSREQLLNHLYDDYRVVTDRTIDSHIKNLRRKLEALDAEQSFIRAVYGVGYRWEADACRIA	100	gnl|BL_ORD_ID|1382|hsp_num:0	1337			0	717	neomycin; amikacin; kanamycin A; tobramycin; novobiocin; gentamicin
	1_2150 # 2287823 # 2288257 # -1 # ID=1_2150;partial=00;start_type=TTG;rbs_motif=None;rbs_spacer=None;gc_cont=0.474	1_2150	2287823	2288257	-	Strict	210	273.5	Escherichia coli AcrAB-TolC with MarR mutations conferring resistance to ciprofloxacin and tetracycline	92.36	3003378	protein overexpression model	n/a	n/a	fluoroquinolone antibiotic; cephalosporin; glycylcycline; penam; tetracycline antibiotic; rifamycin antibiotic; phenicol antibiotic; disinfecting agents and antiseptics	antibiotic target alteration; antibiotic efflux	resistance-nodulation-cell division (RND) antibiotic efflux pump	TTGAAAAGCACCAGTGATCTGTTCAATGAAATCATTCCGCTGGGTCGCTTGATCTACATGGTAAATCAAAAAAAAGATCGCCTGTTAAATAACTATTTATCCCCGCTGGATATCACCGCAACACAGTTTAAAGTGCTTTGCTCGATACGCTGCGCGGGATGTATTACCCCGGTTGAACTTAAAAAAGTGCTGTCTGTCGATCTCGGCGCATTGACGCGAATGCTCGACCGCCTGCTGTGCAAAGGCTGGATCGAAAGACTGCCGAATCCTAATGACAAACGCGGCGTACTGGTGAAGCTAACGCCGGACGGCGCGGCAATTTGTGAGCAATGTCATCAACGACCAGGGCAAGACCTGCATCAGGAATTAACAAAAAACTTAACGGCGGACGAAGTGGCA…	LKSTSDLFNEIIPLGRLIYMVNQKKDRLLNNYLSPLDITATQFKVLCSIRCAGCITPVELKKVLSVDLGALTRMLDRLLCKGWIERLPNPNDKRGVLVKLTPDGAAICEQCHQRPGQDLHQELTKNLTADEVATLEYLLKKILP	MKSTSDLFNEIIPLGRLIHMVNQKKDRLLNEYLSPLDITAAQFKVLCSIRCAACITPVELKKVLSVDLGALTRMLDRLVCKGWVERLPNPNDKRGVLVKLTTGGAAICEQCHQLVGQDLHQELTKNLTADEVATLEYLLKKVLP	100	gnl|BL_ORD_ID|1983|hsp_num:0	431			0	432	tigecycline; ciprofloxacin; tetracycline; rifampin; chloramphenicol; ampicillin; cefalotin; triclosan
	1_4000 # 4243160 # 4243618 # -1 # ID=1_4000;partial=00;start_type=ATG;rbs_motif=AGG;rbs_spacer=11bp;gc_cont=0.549	1_4000	4243160	4243618	-	Strict	300	300.4	Escherichia coli soxR with mutation conferring antibiotic resistance	96.05	3003381	protein overexpression model	n/a	n/a	fluoroquinolone antibiotic; cephalosporin; glycylcycline; penam; tetracycline antibiotic; rifamycin antibiotic; phenicol antibiotic; disinfecting agents and antiseptics	antibiotic target alteration; antibiotic efflux	ATP-binding cassette (ABC) antibiotic efflux pump; major facilitator superfamily (MFS) antibiotic efflux pump; resistance-nodulation-cell division (RND) antibiotic efflux pump	ATGGAAAAAAAATCTCCCCGTTTAAAAGCCTTACTGACGCCGGGGGAAGTTGCGAAACGTAGCGGTGTTGCTGTGTCCGCCCTGCACTTCTATGAAAGCAAAGGGCTAATTACCAGTATCCGTAATAGCGGTAACCAACGGCGATACAAGCGTGACGTGTTGCGTTATGTCGCGATTATCAAGATCGCCCAGCGTATCGGCATCCCGCTGGCAACTATCGGCGACGCGTTTGGTATCTTGCCGGAAGGACATACGTTAAGCGCGAAAGAGTGGAAGCAGCTCTCCTCGCAGTGGCGCGAAGAGTTAGACCGACGTATTCATACGCTGGTGGCGTTGCGCGATGAGCTGGACGGTTGTATCGGCTGCGGCTGTTTATCGCGTAGCGACTGTCCGCTGCGA…	MEKKSPRLKALLTPGEVAKRSGVAVSALHFYESKGLITSIRNSGNQRRYKRDVLRYVAIIKIAQRIGIPLATIGDAFGILPEGHTLSAKEWKQLSSQWREELDRRIHTLVALRDELDGCIGCGCLSRSDCPLRNPGDRLGEHGTGARLLEDD	MEKKLPRIKALLTPGEVAKRSGVAVSALHFYESKGLITSIRNSGNQRRYKRDVLRYVAIIKIAQRIGIPLATIGEAFGVLPEGHTLSAKEWKQLSSQWREELDRRIHTLVALRDELDGCIGCGCLSRSDCPLRNPGDRLGEEGTGARLLEDEQN	98.7	gnl|BL_ORD_ID|1972|hsp_num:0	1005			0	456	tigecycline; ciprofloxacin; tetracycline; rifampin; chloramphenicol; ampicillin; nalidixic acid; norfloxacin; cefalotin; triclosan
	1_4001 # 4243705 # 4244028 # 1 # ID=1_4001;partial=00;start_type=ATG;rbs_motif=GAGG;rbs_spacer=7bp;gc_cont=0.515	1_4001	4243705	4244028	+	Strict	200	209.1	Escherichia coli soxS with mutation conferring antibiotic resistance	95.33	3003511	protein overexpression model	n/a	n/a	fluoroquinolone antibiotic; monobactam; carbapenem; cephalosporin; glycylcycline; cephamycin; penam; tetracycline antibiotic; rifamycin antibiotic; phenicol antibiotic; penem; disinfecting agents and antiseptics	antibiotic target alteration; antibiotic efflux; reduced permeability to antibiotic	ATP-binding cassette (ABC) antibiotic efflux pump; major facilitator superfamily (MFS) antibiotic efflux pump; resistance-nodulation-cell division (RND) antibiotic efflux pump; General Bacterial Porin with reduced permeability to beta-lactams	ATGTCGCATCAGCAGATAATTCAGACCCTTATCGAATGGATTGATGAACATATCGACCAACCGCTAAACATTGATGTGGTGGCAAAAAAATCGGGCTACTCCAAGTGGTATTTGCAGCGGATGTTTCGTACGGTAACGCATCAAACATTAGGCGAGTATATTCGCCAGCGCCGTCTCCTGTTGGCGGCCGTTGAGCTACGAACGACCGAGCGCCCGATTTTTGATATCGCGATGGACCTGGGCTATGTATCGCAGCAAACCTTCTCGCGTGTATTCCGCCGCGAGTTCGATCGCACTCCCAGCGATTACCGTCACCGCCTGTAG	MSHQQIIQTLIEWIDEHIDQPLNIDVVAKKSGYSKWYLQRMFRTVTHQTLGEYIRQRRLLLAAVELRTTERPIFDIAMDLGYVSQQTFSRVFRREFDRTPSDYRHRL	MSHQKIIQDLIAWIDEHIDQPLNIDVVAKKSGYSKWYLQRMFRTVTHQTLGDYIRQRRLLLAAVELRTTERPIFDIAMDLGYVSQQTFSRVFRRQFDRTPSDYRHRL	100	gnl|BL_ORD_ID|1974|hsp_num:0	2066			0	321	tigecycline; ciprofloxacin; tetracycline; rifampin; chloramphenicol; ampicillin; norfloxacin; cefalotin; triclosan; enrofloxacin

## Sheet: ID_SA617
Isolate ID	ORF_ID	Contig	Start	Stop	Orientation	Cut_Off	Pass_Bitscore	Best_Hit_Bitscore	Best_Hit_ARO	Best_Identities	ARO	Model_type	SNPs_in_Best_Hit_ARO	Other_SNPs	Drug Class	Resistance Mechanism	AMR Gene Family	Predicted_DNA	Predicted_Protein	CARD_Protein_Sequence	Percentage Length of Reference Sequence	ID	Model_ID	Nudged	Note	Hit_Start	Hit_End	Antibiotic
SA617	1_369 # 421789 # 422421 # -1 # ID=1_369;partial=00;start_type=ATG;rbs_motif=AGGA;rbs_spacer=9bp;gc_cont=0.506	1_369	421789	422421	-	Strict	400	418.3	CRP	99.05	3000518	protein homolog model	n/a	n/a	macrolide antibiotic; fluoroquinolone antibiotic; penam	antibiotic efflux	resistance-nodulation-cell division (RND) antibiotic efflux pump	ATGGTGCTTGGCAAACCGCAAACAGACCCGACTCTTGAATGGTTCTTGTCTCATTGCCACATTCATAAGTACCCGTCAAAGAGCACGCTGATTCACCAGGGTGAAAAAGCAGAAACGCTGTACTACATCGTTAAAGGCTCCGTGGCAGTGCTGATCAAAGATGAAGAAGGGAAAGAAATGATCCTTTCTTATCTGAATCAGGGTGATTTTATTGGTGAACTGGGCCTGTTTGAAGAAGGCCAGGAACGCAGCGCCTGGGTACGTGCGAAAACCGCATGTGAGGTCGCTGAAATTTCCTACAAAAAATTTCGCCAATTAATCCAGGTCAACCCGGATATTCTGATGCGCCTCTCTTCCCAGATGGCTCGTCGCTTACAAGTCACCTCTGAAAAAGTAGGT…	MVLGKPQTDPTLEWFLSHCHIHKYPSKSTLIHQGEKAETLYYIVKGSVAVLIKDEEGKEMILSYLNQGDFIGELGLFEEGQERSAWVRAKTACEVAEISYKKFRQLIQVNPDILMRLSSQMARRLQVTSEKVGNLAFLDVTGRIAQTLLNLAKQPDAMTHPDGMQIKITRQEIGQIVGCSRETVGRILKMLEDQNLISAHGKTIVVYGTR	MVLGKPQTDPTLEWFLSHCHIHKYPSKSKLIHQGEKAETLYYIVKGSVAVLIKDEEGKEMILSYLNQGDFIGELGLFEEGQERSAWVRAKTACEVAEISYKKFRQLIQVNPDILMRLSAQMARRLQVTSEKVGNLAFLDVTGRIAQTLLNLAKQPDAMTHPDGMQIKITRQEIGQIVGCSRETVGRILKMLEDQNLISAHGKTIVVYGTR	100	gnl|BL_ORD_ID|803|hsp_num:0	869			0	630	erythromycin; cloxacillin; oxacillin; norfloxacin
	1_621 # 660339 # 661160 # 1 # ID=1_621;partial=00;start_type=ATG;rbs_motif=AGG;rbs_spacer=9bp;gc_cont=0.536	1_621	660339	661160	+	Strict	500	511.5	bacA	97.07	3002986	protein homolog model	n/a	n/a	peptide antibiotic	antibiotic target alteration	undecaprenyl pyrophosphate related proteins	ATGAGCGATATGCACTCGCTGCTGATAGCGGCAATTTTGGGTGTGGTCGAAGGATTGACGGAGTTTTTGCCGGTATCCAGCACGGGCCATATGATTATTGTGGGTCATCTGCTGGGGTTTGAAGGCGATACGGCCAAGACATTCGAAGTGGTGATTCAACTTGGATCTATTCTGGCGGTCGTGGTGATGTTCTGGCGGCGGTTGTTTGGCCTCATCGGTATTCACTTTGGCCGCCCGCTACAGCGTGAAGGTGAAAGTAAAGGTCGATTAACGTTGATTCACATCCTGCTGGGCATGATTCCGGCGGTGGTGCTGGGGTTAGTCTTTCATGACACGATCAAGTCGCTATTTAACCCAATTAACGTGATGTACGCGCTGGTGGTAGGCGGTCTGTTGCTG…	MSDMHSLLIAAILGVVEGLTEFLPVSSTGHMIIVGHLLGFEGDTAKTFEVVIQLGSILAVVVMFWRRLFGLIGIHFGRPLQREGESKGRLTLIHILLGMIPAVVLGLVFHDTIKSLFNPINVMYALVVGGLLLIAAECLKPKEPRAPGLDDMTYRQAFMIGCFQCLALWPGFSRSGATISGGMLMGVSRYAASEFSFLLAVPMMMGATVLDLYKSWSFLTAADIPMFAVGFVTAFVVALIAIKTFLQLIKRISFIPFAIYRFVVAAAVYVVFF	MSDMHSLLIAAILGVVEGLTEFLPVSSTGHMIIVGHLLGFEGDTAKTFEVVIQLGSILAVVVMFWRRLFGLIGIHFGRPLQHEGESKGRLTLIHILLGMIPAVVLGLLFHDTIKSLFNPINVMYALVVGGLLLIAAECLKPKEPRAPGLDDMTYRQAFMIGCFQCLALWPGFSRSGATISGGMLMGVSRYAASEFSFLLAVPMMMGATALDLYKSWGFLTSGDIPMFAVGFITAFVVALIAIKTFLQLIKRISFIPFAIYRFIVAAAVYVVFF	100	gnl|BL_ORD_ID|1680|hsp_num:0	1820			0	819	bacitracin; bacitracin A; bacitracin B; bacitracin F
	1_1004 # 1063904 # 1064089 # 1 # ID=1_1004;partial=00;start_type=ATG;rbs_motif=AGGAG;rbs_spacer=6bp;gc_cont=0.511	1_1004	1063904	1064089	+	Strict	100	102.4	rsmA	85.25	3005069	protein homolog model	n/a	n/a	fluoroquinolone antibiotic; diaminopyrimidine antibiotic; phenicol antibiotic	antibiotic efflux	resistance-nodulation-cell division (RND) antibiotic efflux pump	ATGCTGATTCTGACTCGTCGAGTTGGTGAGACCCTCATGATTGGCGATGAGGTCACCGTGACAGTTTTAGGGGTGAAGGGCAACCAGGTGCGTATTGGCGTGAACGCCCCGAAAGAAGTTTCTGTCCATCGTGAAGAGATCTACCAGCGTATCCAGGCTGAAAAATCCCAGCAGTCCAGTTACTAA	MLILTRRVGETLMIGDEVTVTVLGVKGNQVRIGVNAPKEVSVHREEIYQRIQAEKSQQSSY	MLILTRRVGETLMVGDDVTVTVLGVKGNQVRIGVNAPKEVAVHREEIYQRIQKEKDQEPNH	100	gnl|BL_ORD_ID|2788|hsp_num:0	3807			0	183	trimethoprim; chloramphenicol
	1_1010 # 1070400 # 1071938 # -1 # ID=1_1010;partial=00;start_type=ATG;rbs_motif=GAGG;rbs_spacer=8bp;gc_cont=0.571	1_1010	1070400	1071938	-	Strict	900	966.5	emrB	95.9	3000074	protein homolog model	n/a	n/a	fluoroquinolone antibiotic	antibiotic efflux	major facilitator superfamily (MFS) antibiotic efflux pump	ATGCAACAGCAAAAACCGCTGGAGGGCGCGCAGCTCGTCATCATGACGATCGCGCTGTCGCTGGCGACATTCATGCAGGTGCTGGACTCCACCATTGCCAACGTGGCGATTCCGACCATCGCCGGGAACCTGGGTTCTTCCCTAAGCCAGGGGACATGGGTTATCACCTCTTTCGGGGTGGCGAACGCTATCTCGATTCCCTTAACCGGCTGGCTGGCGAAACGTTTTGGCGAAGTCAAACTGTTCATGTGGTCGACGGTCGCCTTTGCCGCGGCCTCCTGGGCCTGTGGCGTATCCAGCAGCCTGAATATGCTTATCTTCTTCCGCGTGGTGCAGGGCGTGGTCGCCGGGCCGCTGATTCCGCTCTCGCAAAGCCTGTTGCTGAATAACTATCCGCCT…	MQQQKPLEGAQLVIMTIALSLATFMQVLDSTIANVAIPTIAGNLGSSLSQGTWVITSFGVANAISIPLTGWLAKRFGEVKLFMWSTVAFAAASWACGVSSSLNMLIFFRVVQGVVAGPLIPLSQSLLLNNYPPAKRSIALALWSMTVIVAPICGPILGGYISDNYHWGWIFFINVPIGIAVVLMTLHTLRGRETHTERRRIDAVGLALLVIGIGSLQIMLDRGKELDWFSSQEIIILTVVAVIAISFLIVWELTDDHPIVDLSLFKSRNFTIGCLCISLAYMLYFGAIVLLPQLLQEVYGYTATWAGLASAPVGIIPVILSPIIGRFAHKLDMRRLVTFSFIMYAVCFYWRAWTFEPGMDFGASAWPQFIQGFAVACFFMPLTTITLSGLPPERLAAAS…	MQQQKPLEGAQLVIMTIALSLATFMQVLDSTIANVAIPTIAGNLGSSLSQGTWVITSFGVANAISIPLTGWLAKRVGEVKLFLWSTIAFAIASWACGVSSSLNMLIFFRVIQGIVAGPLIPLSQSLLLNNYPPAKRSIALALWSMTVIVAPICGPILGGYISDNYHWGWIFFINVPIGVAVVLMTLQTLRGRETRTERRRIDAVGLALLVIGIGSLQIMLDRGKELDWFSSQEIIILTVVAVVAICFLIVWELTDDNPIVDLSLFKSRNFTIGCLCISLAYMLYFGAIVLLPQLLQEVYGYTATWAGLASAPVGIIPVILSPIIGRFAHKLDMRRLVTFSFIMYAVCFYWRAYTFEPGMDFGASAWPQFIQGFAVACFFMPLTTITLSGLPPERLAAAS…	100	gnl|BL_ORD_ID|1705|hsp_num:0	1847			0	1536	nalidixic acid
	1_1012 # 1073254 # 1073784 # -1 # ID=1_1012;partial=00;start_type=ATG;rbs_motif=GAGG;rbs_spacer=10bp;gc_cont=0.482	1_1012	1073254	1073784	-	Strict	280	327	emrR	93.14	3000516	protein homolog model	n/a	n/a	fluoroquinolone antibiotic	antibiotic efflux	major facilitator superfamily (MFS) antibiotic efflux pump	ATGGATAGTTCGTTTACGCCCATTGAACAAATGCTAAAATTTCGCGCCAGCCGTCACGAAGACTTTCCTTATCAGGAAATTCTTTTGACTCGTCTTTGTATGCACATGCAAGGCAAGCTCCTGGAAAACCGCAATAAAATGCTGAAGGCTCAAGGGATTAACGAGACGTTGTTTATGGCGTTGATTACGCTGGAGTCTCAGGAAAACCACAGTATTCAGCCGTCTGAATTAAGCTGCGCGCTGGGTTCATCTCGCACCAATGCGACACGCATTGCAGATGAGCTGGAAAAACGCGGCTGGATTGAGCGTCGTGAGAGCGATAACGACCGCCGTTGCCTGCATCTGCAATTAACGGAGAAAGGCCAGGCATTTTTGCAAGAAGTGCTTCCGCCTCAGCAT…	MDSSFTPIEQMLKFRASRHEDFPYQEILLTRLCMHMQGKLLENRNKMLKAQGINETLFMALITLESQENHSIQPSELSCALGSSRTNATRIADELEKRGWIERRESDNDRRCLHLQLTEKGQAFLQEVLPPQHHCLHQLWSSLSTAEKDQLEHITRKLLTRLDQMEQEGTVLEALR	MDSSFTPIEQMLKFRASRHEDFPYQEILLTRLCMHMQSKLLENRNKMLKAQGINETLFMALITLESQENHSIQPSELSCALGSSRTNATRIADELEKRGWIERRESDNDRRCLHLQLTEKGHEFLREVLPPQHNCLHQLWSALSTTEKDQLEQITRKLLSRLDQMEQDGVVLEAMS	100	gnl|BL_ORD_ID|1225|hsp_num:0	1330			0	525	nalidixic acid
	1_1392 # 1514972 # 1516618 # -1 # ID=1_1392;partial=00;start_type=ATG;rbs_motif=GAG;rbs_spacer=6bp;gc_cont=0.541	1_1392	1514972	1516618	-	Strict	400	718.8	ArnT	62.61	3005053	protein homolog model	n/a	n/a	peptide antibiotic	antibiotic target alteration	pmr phosphoethanolamine transferase	ATGATGAAATCGATACGCTATTATCTGGCTTTCGCCGCATTTATCGCGCTCTACTATGTTATTCCTGTCAATAGCCGCCTGCTCTGGCAGCCGGATGAAACGCGCTATGCCGAAATAAGTCGGGAGATGCTGGCGTCTGGCGACTGGATCGTGCCGCATTTTCTGGGATTACGTTATTTTGAAAAACCGATAGCCGGTTACTGGATAAACAGTCTGGGTCAGTGGCTTTTTGGCGCTACCAATTTTGGCGTGCGGGCTGGCGCTATTTTAACGACATTGCTGGCCGCAGCGCTGGTGGCGTGGCTGACGTTCCGCTTATGGCGGGATAAACGTACCGCGTTGCTCGCCTCCGTTATCTTTCTCTCCCTCTTTGCCGTTTACAGTATCGGGACGTATGCG…	MMKSIRYYLAFAAFIALYYVIPVNSRLLWQPDETRYAEISREMLASGDWIVPHFLGLRYFEKPIAGYWINSLGQWLFGATNFGVRAGAILTTLLAAALVAWLTFRLWRDKRTALLASVIFLSLFAVYSIGTYAVLDPMIALWLTAGMCCFWQGMQATTRTGKIGMFLLLGATCGLGVLTKGFLALAVPVVSVLPWVIVQKRWKDFLLYGWLAVLSCFVVVLPWAIAIARREADFWHYFFWVEHIQRFAMSDAQHKAPFWYYLPVLLAGSLPWLGLLPGALKLGWRERNGAFYLLGWTIMPLLFFSIAKGKLPTYVLSCFAPIAILMARFVLHNVKEGVAALRVNGGINLVFGIIGIVAAFVVSSWGPLKSPVWTHIETYKVFCVWGVFTVWAFVGWYSL…	MKSIRYGVSLIALFALYYLLPLNFRLLWQPDETRYAEISREMLATGDWVVPHFLGLRYFEKPIAGYWINSIGQWLFGHNNFGVRFGSVFAITMTALLVAWLAWRIFRDKRVAILSLIIFLTAMLVYAIGTYAVLDPMITLWLALAMCSFWGAVQAHSRSGKILGYVLLGVACGMGVMTKGFLALAVPVVGVLPWVIARKRWREVLTYGWLAVIVCTLVVLPWGLAIAQREPDFWRYFFWVEHIQRFAEKDAQHKAPFWYYIPFLIAGSLPWLALLPGALKRGWLERDEARGALYLLGWVAMPFLFFSIAKGKLPTYILPCFAPLSILMARYALEAAKTGAKALRINGMINLGVGLLGLIAVLVVSPWGFMHKPVWTKIELYKCLLAAIAFAVWALMGWL…	99.46	gnl|BL_ORD_ID|2779|hsp_num:0	3795			0	1653	colistin A; colistin B
	1_1395 # 1519490 # 1520473 # -1 # ID=1_1395;partial=00;start_type=ATG;rbs_motif=AGGA;rbs_spacer=8bp;gc_cont=0.538	1_1395	1519490	1520473	-	Strict	550	554.7	PmrF	87.42	3003578	protein homolog model	n/a	n/a	peptide antibiotic	antibiotic target alteration	pmr phosphoethanolamine transferase	ATGTTTGACGCCGCCCCCATAAAAAAAGTCTCGGTGGTTATTCCTGTCTATAACGAACAGGAAAGCCTGCCGGAATTGATAAGACGCACCACCGCCGCCTGCGAGAGTCTGGGCAAAGCGTGGGAGATTTTATTGATAGATGATGGTAGCAGCGATAGCTCGGCGGAGCTGATGGTTAAGGCGTCCCAGGAAGCCGATAGCCATATCATCTCTATTTTACTCAACCGTAACTACGGTCAACATGCAGCGATCATGGCGGGGTTTAGCCATGTAAGCGGCGATCTCATCATTACGCTGGATGCCGATCTGCAAAACCCGCCGGAAGAGATCCCGCGCCTGGTGGCGAAAGCCGATGAAGGGTTCGATGTGGTAGGCACCGTGCGCCAGAACCGACAGGAC…	MFDAAPIKKVSVVIPVYNEQESLPELIRRTTAACESLGKAWEILLIDDGSSDSSAELMVKASQEADSHIISILLNRNYGQHAAIMAGFSHVSGDLIITLDADLQNPPEEIPRLVAKADEGFDVVGTVRQNRQDSLFRKSASKIINLLIQRTTGKAMGDYGCMLRAYRRPIIDTMLRCHERSTFIPILANIFARRATEIPVHHAEREFGDSKYSFMRLINLMYDLVTCLTTTPLRLLSLLGSVIAIGGFSLSVLLIVLRLALGPQWAAEGVFMLFAVLFTFIGAQFIGMGLLGEYIGRIYNDVRARPRYFVQQVIYPESTPFTEESHQ	MFEIHPVKKVSVVIPVYNEQESLPELIRRTTTACESLGKEYEILLIDDGSSDNSAHMLVEASQAENSHIVSILLNRNYGQHSAIMAGFSHVTGDLIITLDADLQNPPEEIPRLVAKADEGYDVVGTVRQNRQDSWFRKTASKMINRLIQRTTGKAMGDYGCMLRAYRRHIVDAMLHCHERSTFIPILANIFARRAIEIPVHHAEREFGESKYSFMRLINLMYDLVTCLTTTPLRMLSLLGSIIAIGGFSIAVLLVILRLTFGPQWAAEGVFMLFAVLFTFIGAQFIGMGLLGEYIGRIYTDVRARPRYFVQQVIRPSSKENE	101.55	gnl|BL_ORD_ID|1936|hsp_num:0	2014			0	954	polymyxin B
	1_1668 # 1820416 # 1821840 # 1 # ID=1_1668;partial=00;start_type=TTG;rbs_motif=AGG;rbs_spacer=6bp;gc_cont=0.538	1_1668	1820416	1821840	+	Strict	900	909.1	MdtK	99.16	3001327	protein homolog model	n/a	n/a	fluoroquinolone antibiotic	antibiotic efflux	multidrug and toxic compound extrusion (MATE) transporter	TTGAACGTCTCCACTGCCTTACGCCAGGCTGTCGTCCGTACGCCCTGGTATGCCAAACGCAAGAGCTACAAAGTGTTGTTCTGGCGTGAAATCACCCCACTTGCTATCCCTATTTTTCTGGAAAATACCTGTGTTTTGCTAATGGGCGTGCTCAGTACTTTTCTCGTCAGTTGGCTGGGCAAGGAAGCAATGGCGGGCGTGGGGCTTGCCGACAGTTTTAATATGGTAATTATGGCTTTTTTTGCGGCTATCGATCTTGGTACTACGGTGGTGGTTGCCTTTAGCCTGGGCAAGCGCGACAGGCGACGGGCAAGGGCGGCGGCGCGCCAGTCGCTGGTGATTATGACGCTATTTGCCGTTGTGCTGGCAGTGGTCATTCATTATTTCGGCAGTGAAATT…	MNVSTALRQAVVRTPWYAKRKSYKVLFWREITPLAIPIFLENTCVLLMGVLSTFLVSWLGKEAMAGVGLADSFNMVIMAFFAAIDLGTTVVVAFSLGKRDRRRARAAARQSLVIMTLFAVVLAVVIHYFGSEIINIVAGEATSEVKGLALTYLELTVLSYPAAAIALIGSGALRGAGNTKIPLMINGGMNILNIIISSILIYGAFSWQGLGFAGAGLGLTISRYIGAVAIIWVLMIGFNPALRIPLKSYLKPLNFGIIWEVMGIGIPASIESVLFNGGKLLTQMFVAGMGTNVIAGNFIAFSVAALINLPGNALGSASTIITGKRLGTGQIGQAERQLRHVFWMSTIVLTAIAWGTAPFAGLFASFYTQEQDVKEVVKVLLWLNAVFMPIWAAAWVLPS…	MNVSTALRQAVVRTPWYAKRKSYKVLFWREITPLAIPIFLENTCVLLMGVLSTFLVSWLGKEAMAGVGLADSFNMVIMAFFAAIDLGTTVVVAFSLGKRDRRRARAAARQSLVIMTLFAVVLAVVIHYFGSEIINIVAGEATPEVKGLALTYLELTVLSYPAAAIALIGSGALRGAGNTKIPLMINGGMNILNIIISSILIYGAFSWQGLGFAGAGLGLTISRYIGAVAIIWVLMIGFNPALRIPLKSYLKPLNFGIIWEVMGIGIPASIESVLFNGSKLLTQMFVAGMGTNVIAGNFIAFSVAALINLPGNALGSASTIITGKRLGTGQIGQAERQLRHVFWMSTIVLTAIAWGTAPFAGLFASFYTQEQDVKEVVKVLLWLNAAFMPIWAAAWVLPS…	100	gnl|BL_ORD_ID|1649|hsp_num:0	1752			0	1422	ciprofloxacin
	1_2111 # 2250561 # 2250923 # 1 # ID=1_2111;partial=00;start_type=ATG;rbs_motif=AGGAG;rbs_spacer=7bp;gc_cont=0.446	1_2111	2250561	2250923	+	Strict	150	169.1	Klebsiella pneumoniae KpnE	76.67	3004580	protein homolog model	n/a	n/a	macrolide antibiotic; aminoglycoside antibiotic; cephalosporin; tetracycline antibiotic; peptide antibiotic; rifamycin antibiotic; disinfecting agents and antiseptics	antibiotic efflux	small multidrug resistance (SMR) antibiotic efflux pump	ATGTTTTACTGGATTTTATTAGCTCTGGCTATCGCGACTGAAATTACCGGCACGCTCTCAATGAAATGGGCTAGCGTGGGTAATGGCAATGCGGGTTTTATTTTAATGCTGGTGATGATCACGCTGTCATATATATTTCTTTCTTTTGCGGTAAAAAAGATTGCCCTGGGTGTAGCGTATGCCTTATGGGAAGGGATCGGCATTTTATTTATTACCATTTTTAGCGTGCTGCTATTTGATGAAGCATTATCAACCATGAAGATTGCCGGCTTGCTGACGCTGGTCGCCGGCATAGTATTGATCAAATCAGGGACGCGTAAACCCGGCAAACCGGTGAAGGAGGCGACTCGTGCAACAATTTGA	MFYWILLALAIATEITGTLSMKWASVGNGNAGFILMLVMITLSYIFLSFAVKKIALGVAYALWEGIGILFITIFSVLLFDEALSTMKIAGLLTLVAGIVLIKSGTRKPGKPVKEATRATI	MFYWILLALAIIAEITGTLSMKWASVSGGHTGFILMLAMIALSYIFLAFAVKKIALGVAYALWEGIGILLITLFSVLLFDESLSLLKIAGLTTLVIGIVLIKSGTQKKASSQQEVAHAAV	100	gnl|BL_ORD_ID|2715|hsp_num:0	3283			0	360	erythromycin; streptomycin; tetracycline; cefepime; ceftriaxone; rifampin; colistin A; colistin B; triclosan; benzalkonium chloride; chlorhexidine
	1_2112 # 2250910 # 2251239 # 1 # ID=1_2112;partial=00;start_type=GTG;rbs_motif=AGGAG;rbs_spacer=7bp;gc_cont=0.558	1_2112	2250910	2251239	+	Strict	150	189.1	Klebsiella pneumoniae KpnF	87.16	3004583	protein homolog model	n/a	n/a	macrolide antibiotic; aminoglycoside antibiotic; cephalosporin; tetracycline antibiotic; peptide antibiotic; rifamycin antibiotic; disinfecting agents and antiseptics	antibiotic efflux	small multidrug resistance (SMR) antibiotic efflux pump	GTGCAACAATTTGAATGGATACACGGCGCCTGGCTTGGGCTGGCAATAATGCTGGAAATCGCGGCTAACGTACTGTTGAAATTTTCGGACGGCTTTCGCCGTAAATGCTATGGCATCTTATCGCTTGCCGCTGTTCTGGCCGCCTTCAGCGCGCTTTCCCAGGCGGTAAAAGGGATAGACCTGTCGGTGGCGTATGCGTTATGGGGCGGTTTTGGTATTGCCGCCACGCTGGCGGCGGGCTGGGTGCTCTTCGGCCAGCGCTTAAACCCCAAAGGCTGGGTTGGCGTGATATTGCTGCTCGCCGGAATGGTCATGATCAAATTTGCCTGA	MQQFEWIHGAWLGLAIMLEIAANVLLKFSDGFRRKCYGILSLAAVLAAFSALSQAVKGIDLSVAYALWGGFGIAATLAAGWVLFGQRLNPKGWVGVILLLAGMVMIKFA	MQQFEWIHAAWLAIAIVLEIIANVFLKFSDGFRRKIYGILSLAAVLGAFSALSQAVKGIDLSVAYALWGGFGIAATIAAGWVLFGQRLNNKGWAGVILLVAGMVLIKLA	100	gnl|BL_ORD_ID|2717|hsp_num:0	3286			0	327	erythromycin; streptomycin; tetracycline; cefepime; ceftriaxone; rifampin; colistin A; colistin B; triclosan; benzalkonium chloride; chlorhexidine
	1_2149 # 2287420 # 2287803 # -1 # ID=1_2149;partial=00;start_type=ATG;rbs_motif=GAGG;rbs_spacer=7bp;gc_cont=0.471	1_2149	2287420	2287803	-	Strict	230	247.3	marA	95.24	3000263	protein homolog model	n/a	n/a	fluoroquinolone antibiotic; monobactam; carbapenem; cephalosporin; glycylcycline; cephamycin; penam; tetracycline antibiotic; rifamycin antibiotic; phenicol antibiotic; penem; disinfecting agents and antiseptics	antibiotic efflux; reduced permeability to antibiotic	resistance-nodulation-cell division (RND) antibiotic efflux pump; General Bacterial Porin with reduced permeability to beta-lactams	ATGTCCAGACGCAACACTGACGCTATTACTATTCATAGCATTTTGGACTGGATCGAGGATAACCTGGAGTCGCCGCTCTCACTGGAAAAAGTGTCTGAGCGTTCAGGATATTCCAAATGGCACCTGCAACGGATGTTTAAAAAAGAGACCGGTCATTCATTAGGCCAATACATCCGCAGCCGTAAAATGACGGAAATCGCGCAAAAATTAAAAGAGAGCAACGAGCCCATTCTCTATCTGGCGGAACGCTATGGCTTTGAGTCACAGCAAACATTGACCCGGACGTTCAAAAACTACTTTGATGTGCCGCCACACAAATACCGGATCACCAATATGCATGGCGAATCACGGTATATGCTGCCGCTGAACCATGGCAACTACTAG	MSRRNTDAITIHSILDWIEDNLESPLSLEKVSERSGYSKWHLQRMFKKETGHSLGQYIRSRKMTEIAQKLKESNEPILYLAERYGFESQQTLTRTFKNYFDVPPHKYRITNMHGESRYMLPLNHGNY	MSRRNTDAITIHSILDWIEDNLESPLSLEKVSERSGYSKWHLQRMFKKETGHSLGQYIRSRKMTEIAQKLKESNEPILYLAERYGFESQQTLTRTFKNYFDVPPHKYRMTNMQGESRFLHPLNHYNS	100	gnl|BL_ORD_ID|1771|hsp_num:0	1922			0	378	tigecycline; tetracycline; rifampin; chloramphenicol; ampicillin; cefalotin; triclosan
	1_2244 # 2393159 # 2393596 # 1 # ID=1_2244;partial=00;start_type=ATG;rbs_motif=AGGAG;rbs_spacer=7bp;gc_cont=0.523	1_2244	2393159	2393596	+	Strict	275	298.1	AAC(6')-Iy	97.24	3002569	protein homolog model	n/a	n/a	aminoglycoside antibiotic	antibiotic inactivation	AAC(6')	ATGGACATCAGGCAAATGAACAAAACCCATCTGGAGCACTGGCGCGGATTGCGAAAACAGCTCTGGCCCGGTCACCCGGATGACGCCCATCTGGCAGACGGCGAAGAAATCCTGCAAGCCGATCATTTGGCATCATTTGTTGCGATGGCAGACGGGGTGGCGATTGGCTTTGCGGATGCCTCAATCCGCCACGATTATGTCAATGGCTGTGACAGTTCGCCCGTGGCTTTTCTTGAAGGTATTTTTGTTCTCCCCTCGTTCCGTCAACGCGGCGTAGCGAAACAATTGATTGCAGCGGTGCAACGATGGGGAACGAATAAAGGGTGTCGGGAAATGGCCTCTGATACCACGCCGGAAAATACAATTTCCCAGAAAGTTCACCTGGCATTAGGATTTGAG…	MDIRQMNKTHLEHWRGLRKQLWPGHPDDAHLADGEEILQADHLASFVAMADGVAIGFADASIRHDYVNGCDSSPVAFLEGIFVLPSFRQRGVAKQLIAAVQRWGTNKGCREMASDTTPENTISQKVHLALGFEETERVIFYRKRC	MDIRQMNKTHLEHWRGLRKQLWPGHPDDAHLADGEEILQADHLASFIAMADGVAIGFADASIRHDYVNGCDSSPVVFLEGIFVLPSFRQRGVAKQLIAAVQRWGTNKGCREMASDTSPENTISQKVHQALGFEETERVIFYRKRC	100	gnl|BL_ORD_ID|330|hsp_num:0	360			0	435	dibekacin; amikacin; sisomicin; netilmicin; tobramycin; 2'-N-ethylnetilmicin; 5-episisomicin
	1_2403 # 2550216 # 2550629 # 1 # ID=1_2403;partial=00;start_type=ATG;rbs_motif=GAG;rbs_spacer=9bp;gc_cont=0.454	1_2403	2550216	2550629	+	Strict	240	245.7	H-NS	94.89	3000676	protein homolog model	n/a	n/a	macrolide antibiotic; fluoroquinolone antibiotic; cephalosporin; cephamycin; penam; tetracycline antibiotic	antibiotic efflux	major facilitator superfamily (MFS) antibiotic efflux pump; resistance-nodulation-cell division (RND) antibiotic efflux pump	ATGAGCGAAGCACTTAAAATTCTGAACAACATCCGTACTCTTCGTGCGCAGGCAAGAGAATGTACTCTGGAAACGCTTGAAGAAATGCTGGAAAAATTAGAAGTTGTCGTTAATGAGCGTCGTGAAGAAGAAAGCGCTGCTGCTGCTGAAGTGGAAGAACGCACTCGTAAACTGCAACAGTATCGTGAAATGTTAATTGCCGACGGCATTGACCCGAATGAACTGCTGAATAGCATGGCTGCCGCTAAATCCGGTACCAAAGCTAAACGCGCAGCTCGTCCGGCTAAATATAGCTATGTTGACGAAAACGGTGAAACTAAAACCTGGACTGGCCAGGGTCGTACACCGGCTGTAATCAAAAAAGCAATGGAAGAACAAGGTAAGCAACTGGAAGATTTC…	MSEALKILNNIRTLRAQARECTLETLEEMLEKLEVVVNERREEESAAAAEVEERTRKLQQYREMLIADGIDPNELLNSMAAAKSGTKAKRAARPAKYSYVDENGETKTWTGQGRTPAVIKKAMEEQGKQLEDFLIKE	MSEALKILNNIRTLRAQARECTLETLEEMLEKLEVVVNERREEESAAAAEVEERTRKLQQYREMLIADGIDPNELLNSLAAVKSGTKAKRAQRPAKYSYVDENGETKTWTGQGRTPAVIKKAMDEQGKSLDDFLIKQ	100	gnl|BL_ORD_ID|1144|hsp_num:0	1248			0	411	erythromycin; cloxacillin; ciprofloxacin; tetracycline; oxacillin; norfloxacin
	1_2621 # 2764208 # 2764930 # -1 # ID=1_2621;partial=00;start_type=ATG;rbs_motif=None;rbs_spacer=None;gc_cont=0.492	1_2621	2764208	2764930	-	Strict	470	488.4	sdiA	99.58	3000826	protein homolog model	n/a	n/a	fluoroquinolone antibiotic; cephalosporin; glycylcycline; penam; tetracycline antibiotic; rifamycin antibiotic; phenicol antibiotic; disinfecting agents and antiseptics	antibiotic efflux	resistance-nodulation-cell division (RND) antibiotic efflux pump	ATGCAGGAAAATGATTTCTTCACCTGGCGACGCGCAATGTTGTTACGCTTTCAGGAGATGGCGGCAGCAGAGGATGTTTATACTGAATTGCAATATCAGACACAGCGGCTGGAATTTGATTATTATGCCCTGTGTGTTCGTCATCCCGTCCCCTTTACCCGGCCTAAAATATCGCTTCGTACCACTTATCCTCCGGCGTGGGTAACGCATTACCAGTCCGAAAACTATTTTGCGATCGATCCGGTATTAAAGCCGGAAAATTTCAGGCAGGGTCATTTACATTGGGATGACGTGCTATTTCATGAAGCGCAGGCGATGTGGGATGCCGCCCAGCGTTTCGGATTACGCAGAGGCGTAACCCAGTGTGTGATGTTGCCGAACCGGGCGCTGGGCTTTTTA…	MQENDFFTWRRAMLLRFQEMAAAEDVYTELQYQTQRLEFDYYALCVRHPVPFTRPKISLRTTYPPAWVTHYQSENYFAIDPVLKPENFRQGHLHWDDVLFHEAQAMWDAAQRFGLRRGVTQCVMLPNRALGFLSFSRSSLRCSSFTYDEVELRLQLLARESLSALTRFEDDMVMAPEMRFSKREKEILKWTAEGKTSSEIAIILSISENTVNFHQKNMQKKFNAPNKTQIACYAAATGLI	MQENDFFTWRRAMLLRFQEMAAAEDVYTELQYQTQRLEFDYYALCVRHPVPFTRPKISLRTTYPPAWVTHYQSENYFAIDPVLKPENFRQGHLHWDDVLFHEAKAMWDAAQRFGLRRGVTQCVMLPNRALGFLSFSRSSLRCSSFTYDEVELRLQLLARESLSALTRFEDDMVMAPEMRFSKREKEILKWTAEGKTSSEIAIILSISENTVNFHQKNMQKKFNAPNKTQIACYAAATGLI	100	gnl|BL_ORD_ID|208|hsp_num:0	228			0	720	tigecycline; tetracycline; rifampin; chloramphenicol; ampicillin; cefalotin; triclosan
	1_2791 # 2932277 # 2934025 # -1 # ID=1_2791;partial=00;start_type=ATG;rbs_motif=None;rbs_spacer=None;gc_cont=0.516	1_2791	2932277	2934025	-	Strict	1000	1067.4	msbA	96.39	3003950	protein homolog model	n/a	n/a	nitroimidazole antibiotic	antibiotic efflux	ATP-binding cassette (ABC) antibiotic efflux pump	ATGCATAACGATAAAGATCTCTCTACGTGGCAGACCTTCCGCCGACTGTGGCCAACCATAGCGCCTTTTAAAGCAGGTCTGATCGTGGCGGGCATAGCGTTAATTCTCAACGCAGCCAGCGATACCTTCATGCTATCGCTCCTCAAGCCATTACTGGATGATGGTTTCGGTAAAACGGATCGCTCAGTGTTGCTGTGGATGCCGCTGGTGGTTATTGGGCTGATGATATTACGAGGCATCACTAGCTATATCTCCAGCTACTGTATTTCATGGGTGTCAGGCAAGGTGGTAATGACCATGCGCCGTCGCCTGTTTGGCCATATGATGGGAATGCCCGTCGCCTTCTTTGATAAACAGTCTACCGGTACGCTGCTGTCGCGTATTACTTACGATTCAGAA…	MHNDKDLSTWQTFRRLWPTIAPFKAGLIVAGIALILNAASDTFMLSLLKPLLDDGFGKTDRSVLLWMPLVVIGLMILRGITSYISSYCISWVSGKVVMTMRRRLFGHMMGMPVAFFDKQSTGTLLSRITYDSEQVASSSSGALITVVREGASIIGLFIMMFYYSWQLSIILVVLAPIVSIAIRVVSKRFRSISKNMQNTMGQVTTSAEQMLKGHKEVLIFGGQEVETKRFDKVSNKMRLQGMKMVSASSISDPIIQLIASLALAFVLYAASFPSVMDSLTAGTITVVFSSMIALMRPLKSLTNVNAQFQRGMAACQTLFAILDSEQEKDEGKRVIDRATGDLEFRNVTFTYPGREVPALRNINLKIPAGKTVALVGRSGSGKSTIASLITRFYDIDEGH…	MHNDKDLSTWQTFRRLWPTIAPFKAGLIVAGVALILNAASDTFMLSLLKPLLDDGFGKTDRSVLVWMPLVVIGLMILRGITSYVSSYCISWVSGKVVMTMRRRLFGHMMGMPVSFFDKQSTGTLLSRITYDSEQVASSSSGALITVVREGASIIGLFIMMFYYSWQLSIILIVLAPIVSIAIRVVSKRFRNISKNMQNTMGQVTTSAEQMLKGHKEVLIFGGQEVETKRFDKVSNRMRLQGMKMVSASSISDPIIQLIASLALAFVLYAASFPSVMDSLTAGTITVVFSSMIALMRPLKSLTNVNAQFQRGMAACQTLFTILDSEQEKDEGKRVIERATGDVEFRNVTFTYPGRDVPALRNINLKIPAGKTVALVGRSGSGKSTIASLITRFYDIDEGE…	100	gnl|BL_ORD_ID|2183|hsp_num:0	2423			0	1746	metronidazole
	1_2866 # 3020996 # 3022228 # -1 # ID=1_2866;partial=00;start_type=ATG;rbs_motif=GAG;rbs_spacer=5bp;gc_cont=0.554	1_2866	3020996	3022228	-	Strict	700	700.7	Escherichia coli mdfA	87.71	3001328	protein homolog model	n/a	n/a	tetracycline antibiotic; disinfecting agents and antiseptics	antibiotic efflux	major facilitator superfamily (MFS) antibiotic efflux pump	ATGCAGAATCGTTTACAATCAGGCGGCAGGCTGGGACGTCAGGCGCTGCTTTTTCCTCTCTGTCTGGTGCTGTACGAATTTTCTACTTATATTGGCAACGACATGATCCAGCCGGGTATGCTGGCGGTGGTTGAGCAGTATCAGGCGTGCCTGGACTGGGTTCCGACGTCCATGACCGCTTATCTGGCGGGCGGTATGTTCTTACAGTGGCTGCTTGGCCCGTTGTCTGACCGGATTGGCCGTCGTCCCGTGATGCTGGCGGGCGTCGTGTGGTTTATTGTCACCTGCCTGGCGACGTTACTGGCGAAAAACATCGAACAATTTACCTTCCTGCGTTTTTTGCAAGGGATTAGCCTGTGTTTTATCGGCGCTGTAGGGTATGCCGCGATTCAGGAGTCC…	MQNRLQSGGRLGRQALLFPLCLVLYEFSTYIGNDMIQPGMLAVVEQYQACLDWVPTSMTAYLAGGMFLQWLLGPLSDRIGRRPVMLAGVVWFIVTCLATLLAKNIEQFTFLRFLQGISLCFIGAVGYAAIQESFEEAVCIKITALMANVALIAPLLGPLVGAAWVHVLPWEGMFILFAALAAIAFFGLQRAMPETATRRGETLSFKALGRDYRLVIKNRRFVAGALALGFVSLPLLAWIAQSPIIIISGEQLSSYEYGLLQVPVFGALIAGNLVLARLTSRRTVRSLIVMGGWPIVAGLIIAAAATVVSSHAYLWMTAGLSVYAFGIGLANAGLVRLTLFSSDMSKGTVSAAMGMLQMLIFTVGIEVSKHAWLSGGNGLFSLFNLANGILWLLLMLVFL…	MQNKLASGARLGRQALLFPLCLVLYEFSTYIGNDMRQPGMLENVEQYQAGIEWVPTSMNAYLAGGMFIQWLLGPLSDRIGRRPVMLAGVVWFIVTCLAILLAQNIEQFTLLRFLHGISLCFIGAVGYDAIQESFEEAVCIKITALMANVALIAPLLGPLVGASWIHVLPWEGMFVLFAALAAISFFGLQRAMPETATRIGEKLSLKELGRDYKLVLKNGRFVAGALALGFLSLPLLAWIAQSPIIIITGEQLSSYEYGLLQVPIFGALIAGNLLLARLTSRRTVRSLIIMGGWPIMIGLLVAAAATVISSHAYLWMTAGLSIYAFGIGLANAGLVRLTLFASVMSKGTVSAAMGMLQMLIFTVGIEISKHAWLNGGNGLFNLFNLVNGILLLSLMVIFL…	100	gnl|BL_ORD_ID|2417|hsp_num:0	37			0	1221	tetracycline; benzalkonium chloride
	1_3016 # 3180528 # 3181205 # 1 # ID=1_3016;partial=00;start_type=GTG;rbs_motif=GAGGA;rbs_spacer=3bp;gc_cont=0.563	1_3016	3180528	3181205	+	Strict	400	422.9	kdpE	91.96	3003841	protein homolog model	n/a	n/a	aminoglycoside antibiotic	antibiotic efflux	kdpDE	GTGACAAACGTTCTGATTGTTGAAGATGAACAGGCCATCCGCCGCTTTCTGCGCGCCGCGCTGGAAGGCGACGGCCTGCGCGTGTATGAAGCTGAAACATTACAACGTGGTTTACTGGAAGCCGCCACGCGAAAGCCCGATCTGATTATTCTCGATCTCGGCCTGCCGGACGGCGACGGAATCGATTTCATTCGCGACCTGCGTCAGTGGAGCGCAATACCGGTGATTGTCCTTTCCGCCCGCAGCGAAGAAAGCGATAAGATTGCCGCGCTTGACGCCGGAGCTGATGATTACCTGAGCAAGCCATTCGGCATTGGCGAGTTGCAGGCGCGTTTGCGTGTCGCGCTGCGACGGCACGCCGCCAGCCCTAGCGCCGATCCGATCGTCCGTTTTTCCGGC…	MTNVLIVEDEQAIRRFLRAALEGDGLRVYEAETLQRGLLEAATRKPDLIILDLGLPDGDGIDFIRDLRQWSAIPVIVLSARSEESDKIAALDAGADDYLSKPFGIGELQARLRVALRRHAASPSADPIVRFSGVTVDLAARLIHRGDEEIHLTPIEFRLLAVLLNNTGKVLTQRQLLNQVWGPNAVEHSHYLRIYMGHLRQKLEQDPTRPRHFITETGIGYRFMP	MTNVLIVEDEQAIRRFLRTALEGDGMRVFEAETLQRGLLEAATRKPDLIILDLGLPDGDGIEFIRDLRQWSAVPVIVLSARSEESDKIAALDAGADDYLSKPFGIGELQARLRVALRRHSATTAPDPLVKFSDVTVDLAARVIHRGEEEVHLTPIEFRLLAVLLNNAGKVLTQRQLLNQVWGPNAVEHSHYLRIYMGHLRQKLEQDPARPRHFITETGIGYRFML	100	gnl|BL_ORD_ID|2101|hsp_num:0	2331			0	672	kanamycin A
	1_3232 # 3406630 # 3407823 # 1 # ID=1_3232;partial=00;start_type=ATG;rbs_motif=GAGG;rbs_spacer=7bp;gc_cont=0.554	1_3232	3406630	3407823	+	Strict	670	691	Escherichia coli acrA	91.69	3004043	protein homolog model	n/a	n/a	fluoroquinolone antibiotic; cephalosporin; glycylcycline; penam; tetracycline antibiotic; rifamycin antibiotic; phenicol antibiotic; disinfecting agents and antiseptics	antibiotic efflux	resistance-nodulation-cell division (RND) antibiotic efflux pump	ATGAACAAAAACAGAGGGTTAACGCCTCTGGCGGTCGTTCTGATGCTCTCAGGCAGCTTAGCGCTAACAGGATGTGACGACAAACAGGACCAGCAAGGCGGCCAGCAGATGCCAGAAGTTGGAGTTGTCACACTAAAAACGGAACCACTGCAAATCACAACTGAACTTCCGGGTCGTACCGTTGCTTACCGTATCGCCGAAGTTCGCCCACAGGTAAGCGGCATTATCCTGAAGCGTAATTTCGTTGAGGGAAGTGATATCGAAGCGGGAGTCTCTCTCTATCAGATTGATCCTGCGACCTACCAGGCGACTTACGACAGCGCTAAGGGCGATCTGGCAAAAGCGCAGGCCGCCGCGAATATCGCTGAACTGACGGTGAAGCGTTATCAAAAGCTGCTG…	MNKNRGLTPLAVVLMLSGSLALTGCDDKQDQQGGQQMPEVGVVTLKTEPLQITTELPGRTVAYRIAEVRPQVSGIILKRNFVEGSDIEAGVSLYQIDPATYQATYDSAKGDLAKAQAAANIAELTVKRYQKLLGTQYISKQEYDQALADAQQATAAVVAAKAAVETARINLAYTKVTSPISGRIGKSSVTEGALVQNGQASALATVQQLDPIYVDVTQSSNDFLRLKQELANGSLKQENGKAKVDLVTSDGIKFPQSGTLEFSDVTVDQTTGSITLRAIFPNPDHTLLPGMFVRARLQEGTKPTALLVPQQGVTRTPRGDATVLVVGADNKVETRQIVASQAIGDKWLVTDGLKAGDRVVVSGLQKVRPGAQVKVQEITADNKQQAASGDQPAQPRS	MNKNRGFTPLAVVLMLSGSLALTGCDDKQAQQGGQQMPAVGVVTVKTEPLQITTELPGRTSAYRIAEVRPQVSGIILKRNFKEGSDIEAGVSLYQIDPATYQATYDSAKGDLAKAQAAANIAQLTVNRYQKLLGTQYISKQEYDQALADAQQANAAVTAAKAAVETARINLAYTKVTSPISGRIGKSNVTEGALVQNGQATALATVQQLDPIYVDVTQSSNDFLRLKQELANGTLKQENGKAKVSLITSDGIKFPQDGTLEFSDVTVDQTTGSITLRAIFPNPDHTLLPGMFVRARLEEGLNPNAILVPQQGVTRTPRGDATVLVVGADDKVETRPIVASQAIGDKWLVTEGLKAGDRVVISGLQKVRPGVQVKAQEVTADNNQQAASGAQPEQSKS	100	gnl|BL_ORD_ID|2319|hsp_num:0	2661			0	1191	tigecycline; tetracycline; rifampin; chloramphenicol; ampicillin; cefalotin; triclosan
	1_3233 # 3407846 # 3410995 # 1 # ID=1_3233;partial=00;start_type=ATG;rbs_motif=AGGAG;rbs_spacer=10bp;gc_cont=0.543	1_3233	3407846	3410995	+	Strict	1900	1902.5	acrB	94.66	3000216	protein homolog model	n/a	n/a	fluoroquinolone antibiotic; cephalosporin; glycylcycline; penam; tetracycline antibiotic; rifamycin antibiotic; phenicol antibiotic; disinfecting agents and antiseptics	antibiotic efflux	resistance-nodulation-cell division (RND) antibiotic efflux pump	ATGCCTAATTTCTTTATCGATCGCCCTATATTTGCGTGGGTGATCGCCATCATCATCATGTTGGCAGGGGGGCTCGCGATCCTCAAATTGCCGGTAGCGCAATATCCGACGATTGCGCCACCAGCAGTGACGATCTCCGCAACCTACCCTGGCGCTGATGCGAAAACGGTACAGGATACCGTCACGCAGGTTATCGAACAGAATATGAACGGTATCGATAACCTGATGTATATGTCCTCCAACAGTGACTCCACGGGGACCGTGCAGATCACGCTGACCTTTGAATCCGGCACCGATGCGGATATCGCGCAGGTTCAGGTTCAGAACAAGTTGCAACTGGCAATGCCTTTACTTCCCCAGGAAGTACAGCAACAGGGCGTGAGCGTTGAGAAGTCCTCA…	MPNFFIDRPIFAWVIAIIIMLAGGLAILKLPVAQYPTIAPPAVTISATYPGADAKTVQDTVTQVIEQNMNGIDNLMYMSSNSDSTGTVQITLTFESGTDADIAQVQVQNKLQLAMPLLPQEVQQQGVSVEKSSSSFLMVVGVINTDGTMTQEDISDYVAANMKDPISRTSGVGDVQLFGSQYAMRIWMNPTELTKYQLTPVDVINAIKAQNAQVAAGQLGGTPPVKGQQLNASIIAQTRLTSTDEFGKILLKVNQDGSQVRLRDVAKIELGGENYDVIAKFNGQPASGLGIKLATGANALDTATAIRAELKKMEPFFPPGMKIVYPYDTTPFVKISIHEVVKTLVEAIILVFLVMYLFLQNFRATLIPTIAVPVVLLGTFAVLAAFGFSINTLTMFGMV…	MPNFFIDRPIFAWVIAIIIMLAGGLAILKLPVAQYPTIAPPAVTISASYPGADAKTVQDTVTQVIEQNMNGIDNLMYMSSNSDSTGTVQITLTFESGTDADIAQVQVQNKLQLAMPLLPQEVQQQGVSVEKSSSSFLMVVGVINTDGTMTQEDISDYVAANMKDAISRTSGVGDVQLFGSQYAMRIWMNPNELNKFQLTPVDVITAIKAQNAQVAAGQLGGTPPVKGQQLNASIIAQTRLTSTEEFGKILLKVNQDGSRVLLRDVAKIELGGENYDIIAEFNGQPASGLGIKLATGANALDTAAAIRAELAKMEPFFPSGLKIVYPYDTTPFVKISIHEVVKTLVEAIILVFLVMYLFLQNFRATLIPTIAVPVVLLGTFAVLAAFGFSINTLTMFGMV…	100	gnl|BL_ORD_ID|1011|hsp_num:0	1104			0	3144	tigecycline; acriflavine; tetracycline; rifampin; chloramphenicol; ampicillin; cefalotin; triclosan
	1_3328 # 3505576 # 3506688 # 1 # ID=1_3328;partial=00;start_type=ATG;rbs_motif=None;rbs_spacer=None;gc_cont=0.517	1_3328	3505576	3506688	+	Strict	250	261.2	vanG	38.87	3002909	protein homolog model	n/a	n/a	glycopeptide antibiotic	antibiotic target alteration	glycopeptide resistance gene cluster; Van ligase	ATGGAATGGGTTTTTAAGATGGCGAAATTGCGGGTAGGAATAGTATTTGGCGGTAAGTCGGCGGAACATGAAGTGTCTTTGCAATCAGCGAAAAATATCGTTGATGCGATCGATAAAACCCGCTTCGACGTGGTGCTGTTAGGGATAGATAAGGCGGGACAATGGCATGTTAACGATGCGGAAAATTATTTGCAGAATGCAGACGATCCGGCACATATCGCGCTACGTCCTTCGGCAATCAGTCTGGCCCAGGTGCCTGGCAAACATCAACACCAATTGATTAACGCCCAGAACGGGCAGCCGCTACCGACGGTAGATGTTATTTTTCCTATCGTCCACGGTACGCTGGGCGAAGACGGCTCATTGCAGGGGATGCTGCGCGTCGCAAACTTACCGTTT…	MEWVFKMAKLRVGIVFGGKSAEHEVSLQSAKNIVDAIDKTRFDVVLLGIDKAGQWHVNDAENYLQNADDPAHIALRPSAISLAQVPGKHQHQLINAQNGQPLPTVDVIFPIVHGTLGEDGSLQGMLRVANLPFVGSDVLSSAACMDKDIAKRLLRDAGLNIAPFITLTRTNRHAFSFAEVESRLGLPLFVKPANQGSSVGVSKVANEAQYQQAVALAFEFDHKVVVEQGIKGREIECAVLGNDNPQASTCGEIVLNSEFYAYDTKYIDDNGAQVVVPAQLPSGVNDKIRAIAIQAYQTLGCAGMARVDVFLTADNEVVINEINTLPGFTNISMYPKLWQASGLGYTDLISRLIELALERHTANNALKTTM	MQNKKIAVIFGGNSTEYEVSLQSASAVFENINTNKFDIIPIGITRSGEWYHYTGEKEKILNNTWFEDSKNLCPVVVSQNRSVKGFLEIASDKYRIIKVDLVFPVLHGKNGEDGTLQGIFELAGIPVVGCDTLSSALCMDKDRAHKLVSLAGISVPKSVTFKRFNEEAAMKEIEANLTYPLFIKPVRAGSSFGITKVIEKQELDAAIELAFEHDTEVIVEETINGFEVGCAVLGIDELIVGRVDEIELSSGFFDYTEKYTLKSSKIYMPARIDAEAEKRIQEAAVTIYKALGCSGFSRVDMFYTPSGEIVFNEVNTIPGFTSHSRYPNMMKGIGLSFSQMLDKLIGLYVE	106.02	gnl|BL_ORD_ID|1069|hsp_num:0	1157			0	1047	vancomycin
	1_3354 # 3538984 # 3539448 # -1 # ID=1_3354;partial=00;start_type=ATG;rbs_motif=AGGAG;rbs_spacer=7bp;gc_cont=0.544	1_3354	3538984	3539448	-	Perfect	290	310.1	golS	100	3000504	protein homolog model	n/a	n/a	monobactam; carbapenem; cephalosporin; cephamycin; penam; phenicol antibiotic; penem	antibiotic efflux	resistance-nodulation-cell division (RND) antibiotic efflux pump	ATGAACATCGGTAAAGCAGCTAAAGCATCGAAAGTCTCGGCCAAAATGATTCGCTACTATGAACAGATTGGTCTGATTCCCGCGGCAAGTCGGACGGATTCCGGCTATCGGGCCTATACCCAGGCTGATGTTAATCAATTGCATTTTATACGCCGCGCGCGCGACCTCGGTTTTTCAGTTGCTGAAATCAGCGACTTACTGAATCTTTGGAATAACCAGTCGCGGCAAAGCGCTGACGTCAAACGCCTGGCGCAGACGCACATTGATGAACTGGACAGACGTATCCAGAACATGCAGCACATGGCGCAAACCCTCAAAGCGCTGATTCACTGCTGCGCCGGCGACGCGCTGCCAGATTGTCCCATTCTGCATACGCTTGGACAACCTGACGATAGCGAG…	MNIGKAAKASKVSAKMIRYYEQIGLIPAASRTDSGYRAYTQADVNQLHFIRRARDLGFSVAEISDLLNLWNNQSRQSADVKRLAQTHIDELDRRIQNMQHMAQTLKALIHCCAGDALPDCPILHTLGQPDDSEPEARTGAVLRRPRRHGLAKRL	MNIGKAAKASKVSAKMIRYYEQIGLIPAASRTDSGYRAYTQADVNQLHFIRRARDLGFSVAEISDLLNLWNNQSRQSADVKRLAQTHIDELDRRIQNMQHMAQTLKALIHCCAGDALPDCPILHTLGQPDDSEPEARTGAVLRRPRRHGLAKRL	100	gnl|BL_ORD_ID|36|hsp_num:0	44			0	462	chloramphenicol
	1_3357 # 3543248 # 3546415 # 1 # ID=1_3357;partial=00;start_type=ATG;rbs_motif=AGG;rbs_spacer=10bp;gc_cont=0.567	1_3357	3543248	3546415	+	Strict	750	1209.9	adeF	60.67	3000777	protein homolog model	n/a	n/a	fluoroquinolone antibiotic; tetracycline antibiotic	antibiotic efflux	resistance-nodulation-cell division (RND) antibiotic efflux pump	ATGAAATTCACCCACTTTTTCATTGCACGACCCATCTTCGCCATCGTCCTGTCGCTGTTAATGCTGCTGGCTGGCGCTATCGCCTTTTTAAAACTGCCGCTGAGTGAATATCCGGCCGTTACGCCGCCCACGGTACAGGTTAGCGCCAGCTACCCCGGCGCTAACCCGCAAGTGATTGCCGATACGGTAGCCGCGCCGCTGGAACAGGTGATCAACGGCGTTGACGGCATGTTGTATATGAATACCCAGATGGCCATTGATGGTCGCATGGTTATCTCTATCGCCTTCGAACAGGGAACCGATCCTGATATGGCGCAAATTCAGGTGCAAAACCGGGTATCCCGCGCGCTGCCTCGCCTGCCCGAAGAAGTCCAGCGAATTGGCGTTGTAACGGAGAAA…	MKFTHFFIARPIFAIVLSLLMLLAGAIAFLKLPLSEYPAVTPPTVQVSASYPGANPQVIADTVAAPLEQVINGVDGMLYMNTQMAIDGRMVISIAFEQGTDPDMAQIQVQNRVSRALPRLPEEVQRIGVVTEKTSPDMLMVVHLVSPQKRYDSLYLSNFAIRQVRDELARLPGVGDVLVWGAGEYAMRVWLDPAKIANRGLTASDIVTALREQNVQVAAGSVGQQPEASAAFQMTVNTLGRLTSEEQFGEIVVKIGADGEVTRLRDVARVTLGADAYTLRSLLNGEAAPALQIIQSPGANAIDVSNAIRGKMDELQQNFPQDIEYRIAYDPTVFVRASLQSVAITLLEALVLVVLVVVLFLQTWRASIIPLVAVPVSLVGTFALMHLFGFSLNTLSLFG…	MNISKFFIDRPIFAGVLSVLILLAGLLSVFQLPISEYPEVVPPSVVVRAQYPGANPKVIAETVASPLEESINGVEDMLYMQSQANSDGNLTITVNFKLGIDPDKAQQLVQNRVSQAMPRLPEDVQRLGVTTLKSSPTLTMVVHLTSPDNRYDMTYLRNYAVLNVKDRLARLQGVGEVGLFGSGDYAMRVWLDPQKVAQRNLTATEIVNAIREQNIQVAAGTIGASPSNSPLQLSVNAQGRLTTEQEFADIILKTAPDGAVTRLGDVARVELAASQYGLRSLLDNKQAVAIPIFQAPGANALQVSDQVRSTMKELSKDFPSSIKYDIVYDPTQFVRASIKAVVHTLLEAITLVVVVVILFLQTWRASIIPLLAVPVSIIGTFALMLAFGYSINALSLFGM…	99.62	gnl|BL_ORD_ID|133|hsp_num:0	153			0	3126	tetracycline
	1_3572 # 3784416 # 3785360 # -1 # ID=1_3572;partial=00;start_type=ATG;rbs_motif=GGAG;rbs_spacer=6bp;gc_cont=0.476	1_3572	3784416	3785360	-	Strict	500	562	leuO	86.62	3003843	protein homolog model	n/a	n/a	nucleoside antibiotic; disinfecting agents and antiseptics	antibiotic efflux	major facilitator superfamily (MFS) antibiotic efflux pump	ATGCCAGAGGTCAAAACCGAAAAGCCGCATCTTTTAGATATGGGCAAACCACAGCTTCGCATGGTTGATTTGAACCTATTGACCGTGTTCGATGCGGTAATGCAAGAGCAGAATATTACGCGCGCCGCCCACACGCTGGGAATGTCGCAGCCTGCGGTCAGTAACGCCGTAGCGCGTCTGAAGGTTATGTTTAATGACGAACTTTTTGTTCGATATGGACGAGGAATTCAGCCGACTGCCCGTGCATTTCAGTTATTTGGTTCAGTCCGTCAGGCGTTACAATTGGTGCAAAATGAATTGCCGGGATCGGGGTTTGAGCCGACCAGCAGCGAACGTGTATTCAATCTTTGCGTGTGCAGTCCGCTGGATAATATCCTGACGTCACAGATTTATAATCGT…	MPEVKTEKPHLLDMGKPQLRMVDLNLLTVFDAVMQEQNITRAAHTLGMSQPAVSNAVARLKVMFNDELFVRYGRGIQPTARAFQLFGSVRQALQLVQNELPGSGFEPTSSERVFNLCVCSPLDNILTSQIYNRVEKIAPNIHVVFKASLNQNTEHQLRYQETEFVISYEEFRRPEFTSVPLFKDEMVLVASRKHPRISGPLLEGDVYNEQHAVVSLDRYASFSQPWYDTPDKQSSVAYQGMVLISVLNVVSQTHLVAIAPRWLAEEFAESLDLQILPLPLKLNSRTCYLSWHEAAGRDKGHQWMEDLLVSVCKR	MPEVQTDHPETAELSKPQLRMVDLNLLTVFDAVMQEQNITRAAHALGMSQPAVSNAVARLKVMFNDELFVRYGRGIQPTARAFQLFGSVRQALQLVQNELPGSGFEPASSERVFHLCVCSPLDSILTSQIYNHIEQIAPNIHVMFKSSLNQNTEHQLRYQETEFVISYEDFHRPEFTSVPLFKDEMVLVASKNHPTIKGPLLKHDVYNEQHAAVSLDRFASFSQTWYDTVDKQASIAYQGMAMMSVLSVVSQTHLVAIAPRWLAEEFAESLELQVLPLPLKQNSRTCYLSWHEAAGRDKGHQWMEEQLVSICKR	100	gnl|BL_ORD_ID|4919|hsp_num:0	5921			0	942	acriflavine; puromycin
	3_11 # 7019 # 7879 # -1 # ID=3_11;partial=00;start_type=ATG;rbs_motif=AGGA;rbs_spacer=5bp;gc_cont=0.490	3_11	7019	7879	-	Perfect	500	571.2	TEM-135	100	3000999	protein homolog model	n/a	n/a	monobactam; cephalosporin; penam; penem	antibiotic inactivation	TEM beta-lactamase	ATGAGTATTCAACATTTTCGTGTCGCCCTTATTCCCTTTTTTGCGGCATTTTGCCTTCCTGTTTTTGCTCACCCAGAAACGCTGGTGAAAGTAAAAGATGCTGAAGATCAGTTGGGTGCACGAGTGGGTTACATCGAACTGGATCTCAACAGCGGTAAGATCCTTGAGAGTTTTCGCCCCGAAGAACGTTTTCCAATGATGAGCACTTTTAAAGTTCTGCTATGTGGTGCGGTATTATCCCGTGTTGACGCCGGGCAAGAGCAACTCGGTCGCCGCATACACTATTCTCAGAATGACTTGGTTGAGTACTCACCAGTCACAGAAAAGCATCTTACGGATGGCATGACAGTAAGAGAATTATGCAGTGCTGCCATAACCATGAGTGATAACACTGCTGCC…	MSIQHFRVALIPFFAAFCLPVFAHPETLVKVKDAEDQLGARVGYIELDLNSGKILESFRPEERFPMMSTFKVLLCGAVLSRVDAGQEQLGRRIHYSQNDLVEYSPVTEKHLTDGMTVRELCSAAITMSDNTAANLLLTTIGGPKELTAFLHNMGDHVTRLDRWEPELNEAIPNDERDTTTPAAMATTLRKLLTGELLTLASRQQLIDWMEADKVAGPLLRSALPAGWFIADKSGAGERGSRGIIAALGPDGKPSRIVVIYTTGSQATMDERNRQIAEIGASLIKHW	MSIQHFRVALIPFFAAFCLPVFAHPETLVKVKDAEDQLGARVGYIELDLNSGKILESFRPEERFPMMSTFKVLLCGAVLSRVDAGQEQLGRRIHYSQNDLVEYSPVTEKHLTDGMTVRELCSAAITMSDNTAANLLLTTIGGPKELTAFLHNMGDHVTRLDRWEPELNEAIPNDERDTTTPAAMATTLRKLLTGELLTLASRQQLIDWMEADKVAGPLLRSALPAGWFIADKSGAGERGSRGIIAALGPDGKPSRIVVIYTTGSQATMDERNRQIAEIGASLIKHW	100	gnl|BL_ORD_ID|1558|hsp_num:0	1697			0	858	penicillin; ampicillin
	1_54 # 57532 # 58923 # 1 # ID=1_54;partial=00;start_type=ATG;rbs_motif=AGGAG;rbs_spacer=6bp;gc_cont=0.552	1_54	57532	58923	+	Strict	850	867.1	Escherichia coli UhpT with mutation conferring resistance to fosfomycin	95.68	3003890	protein variant model	E350Q	n/a	phosphonic acid antibiotic	antibiotic target alteration	antibiotic-resistant UhpT	ATGCTGGCCTTCTTAAACCAGGTGCGCAAGCCGACCCTGGATCTGCCGCTCGATGTGCGGCGTAAAATGTGGTTCAAGCCGTTCATGCAGTCCTATCTGGTGGTTTTTATCGGCTACCTGACCATGTACCTGATCCGCAAAAACTTTAACATCGCGCAGAACGACATGATTTCTACCTACGGGTTGAGCATGACCGAGCTGGGGATGATTGGCCTGGGCTTCTCGATCACCTACGGCGTGGGGAAAACGCTGGTTTCCTACTACGCTGACGGTAAAAATACCAAGCAGTTTCTACCGTTTATGTTGATCCTCTCCGCTATCTGTATGCTCGGCTTCAGCGCCAGCATGGGCGCGGGGTCAACCAGTCTGTTTCTGATGATCGCTTTCTATGCCCTGAGC…	MLAFLNQVRKPTLDLPLDVRRKMWFKPFMQSYLVVFIGYLTMYLIRKNFNIAQNDMISTYGLSMTELGMIGLGFSITYGVGKTLVSYYADGKNTKQFLPFMLILSAICMLGFSASMGAGSTSLFLMIAFYALSGFFQSTGGSCSYSTITKWTPRRKRGTFLGFWNISHNLGGAGAAGVALFGANYLFDGHVIGMFIFPSIIALIVGFIGLRFGSDSPESYGLGKAEELFGEEISEEDKETEENEMTKWQIFVEYVLKNKVIWLLCFSNIFLYVVRIGIDQWSTVYAFQELKLSKEVAIQGFTLFEVGALVGTLLWGWLSDLANGRRALVACVALALIIATLGVYQHASNQYVYLASLFALGFLVFGPQLLIGVAAVGFVPKKAIGAADGIKGTFAYLIG…	MLAFLNQVRKPTLDLPLEVRRKMWFKPFMQSYLVVFIGYLTMYLIRKNFNIAQNDMISTYGLSMTQLGMIGLGFSITYGVGKTLVSYYADGKNTKQFLPFMLILSAICMLGFSASMGSGSVSLFLMIAFYALSGFFQSTGGSCSYSTITKWTPRRKRGTFLGFWNISHNLGGAGAAGVALFGANYLFDGHVIGMFIFPSIIALIVGFIGLRYGSDSPESYGLGKAEELFGEEISEEDKETESTDMTKWQIFVEYVLKNKVIWLLCFANIFLYVVRIGIDQWSTVYAFQELKLSKAVAIQGFTLFEAGALVGTLLWGWLSDLANGRRGLVACIALALIIATLGVYQHASNEYIYLASLFALGFLVFGPQLLIGVAAVGFVPKKAIGAADGIKGTFAYLIG…	100	gnl|BL_ORD_ID|2126|hsp_num:0	2373			0	1389	fosfomycin
	1_390 # 438579 # 439763 # 1 # ID=1_390;partial=00;start_type=GTG;rbs_motif=AGGA;rbs_spacer=8bp;gc_cont=0.542	1_390	438579	439763	+	Strict	700	786.9	Escherichia coli EF-Tu mutants conferring resistance to Pulvomycin	99.49	3003369	protein variant model	R234F	n/a	elfamycin antibiotic	antibiotic target alteration	elfamycin resistant EF-Tu	GTGTCTAAAGAAAAATTTGAACGTACAAAACCGCACGTTAACGTCGGCACCATCGGCCACGTTGACCACGGTAAAACTACCCTGACCGCTGCAATCACCACCGTACTGGCTAAAACCTACGGCGGTGCTGCTCGTGCATTCGACCAGATCGATAACGCGCCGGAAGAAAAAGCGCGTGGTATCACCATCAACACTTCTCACGTTGAATACGATACCCCGACCCGCCACTACGCACACGTAGACTGCCCGGGGCACGCCGACTATGTTAAAAACATGATCACCGGTGCTGCTCAGATGGACGGCGCGATTCTGGTTGTTGCTGCGACTGACGGCCCGATGCCGCAGACCCGTGAGCACATCCTGCTGGGTCGTCAGGTAGGCGTTCCGTACATCATCGTG…	MSKEKFERTKPHVNVGTIGHVDHGKTTLTAAITTVLAKTYGGAARAFDQIDNAPEEKARGITINTSHVEYDTPTRHYAHVDCPGHADYVKNMITGAAQMDGAILVVAATDGPMPQTREHILLGRQVGVPYIIVFLNKCDMVDDEELLELVEMEVRELLSQYDFPGDDTPIVRGSALKALEGDAEWEAKIIELAGFLDSYIPEPERAIDKPFLLPIEDVFSISGRGTVVTGRVERGIIKVGEEVEIVGIKETQKSTCTGVEMFRKLLDEGRAGENVGVLLRGIKREEIERGQVLAKPGTIKPHTKFESEVYILSKDEGGRHTPFFKGYRPQFYFRTTDVTGTIELPEGVEMVMPGDNIKMVVTLIHPIAMDDGLRFAIREGGRTVGAGVVAKVLG	MLSPEGESTIVRNIAVSKEKFERTKPHVNVGTIGHVDHGKTTLTAAITTVLAKTYGGAARAFDQIDNAPEEKARGITINTSHVEYDTPTRHYAHVDCPGHADYVKNMITGAAQMDGAILVVAATDGPMPQTREHILLGRQVGVPYIIVFLNKCDMVDDEELLELVEMEVRELLSQYDFPGDDTPIVRGSALKALEGDAEWEAKILELAGFLDSYIPEPERAIDKPFLLPIEDVFSISGRGTVVTGRVERGIIKVGEEVEIVGIKETQKSTCTGVEMFRKLLDEGRAGENVGVLLRGIKREEIERGQVLAKPGTIKPHTKFESEVYILSKDEGGRHTPFFKGYRPQFYFRTTDVTGTIELPEGVEMVMPGDNIKMVVTLIHPIAMDDGLRFAIREGGRTV…	96.33	gnl|BL_ORD_ID|1969|hsp_num:0	2158			45	1227	pulvomycin
	1_1411 # 1535600 # 1536958 # 1 # ID=1_1411;partial=00;start_type=ATG;rbs_motif=GGAG;rbs_spacer=8bp;gc_cont=0.548	1_1411	1535600	1536958	+	Strict	850	898.7	Escherichia coli GlpT with mutation conferring resistance to fosfomycin	96.9	3003889	protein variant model	E448K	n/a	phosphonic acid antibiotic	antibiotic target alteration	antibiotic-resistant GlpT	ATGTTGAGTATTTTTAAACCAGCGCCGCATAAAGCGCGCTTGCCAGCGGCGGAGATTGATCCGACCTATCGCCGATTACGCTGGCAGATTTTCCTGGGGATATTCTTTGGCTATGCCGCGTATTATCTGGTGCGCAAGAACTTTGCCCTCGCGATGCCCTACCTGGTAGAACAGGGTTTTTCACGCGGCGATCTGGGCTTTGCGTTGTCCGGGATTTCCATCGCTTATGGTTTTTCGAAATTTATAATGGGTTCGGTGTCCGATCGCTCGAATCCGCGCGTTTTTCTGCCGGCAGGGTTGATTCTGGCCGCAGCAGTCATGTTGTTTATGGGCTTTGTGCCGTGGGCGACATCCAGCATCGCCGTGATGTTTGTGCTGTTGTTCCTTTGCGGCTGGTTC…	MLSIFKPAPHKARLPAAEIDPTYRRLRWQIFLGIFFGYAAYYLVRKNFALAMPYLVEQGFSRGDLGFALSGISIAYGFSKFIMGSVSDRSNPRVFLPAGLILAAAVMLFMGFVPWATSSIAVMFVLLFLCGWFQGMGWPPCGRTMVHWWSQKERGGIVSVWNCAHNVGGGIPPLLFLLGMAWFNDWKAALYMPAFGAIVVALFAFAMMRDTPQSCGLPPIEEYKNDYPDDYNEKAEEELTAKQIFMQYVLPNKLLWYIAIANVFVYLLRYGILDWSPTYLKEVKHFALDKSSWAYFLYEYAGIPGTLLCGWMSDKVFRGNRGATGVFFMTLVTIATIVYWMNPAGNPNVDMACMIIIGFLIYGPVMLIGLHALELAPKKAAGTAAGFTGLFGYLGGSVA…	MLSIFKPAPHKARLPAAEIDPTYRRLRWQIFLGIFFGYAAYYLVRKNFALAMPYLVEQGFSRGDLGFALSGISIAYGFSKFIMGSVSDRSNPRVFLPAGLILAAAVMLFMGFVPWATSSIAVMFVLLFLCGWFQGMGWPPCGRTMVHWWSQKERGGIVSVWNCAHNVGGGIPPLLFLLGMAWFNDWHAALYMPAFCAILVALFAFAMMRDTPQSCGLPPIEEYKNDYPDDYNEKAEQELTAKQIFMQYVLPNKLLWYIAIANVFVYLLRYGILDWSPTYLKEVKHFALDKSSWAYFLYEYAGIPGTLLCGWMSDKVFRGNRGATGVFFMTLVTIATIVYWMNPAGNPTVDMICMIVIGFLIYGPVMLIGLHALELAPKKAAGTAAGFTGLFGYLGGSVA…	100	gnl|BL_ORD_ID|2127|hsp_num:0	2372			0	1356	fosfomycin
	1_1422 # 1549216 # 1551852 # 1 # ID=1_1422;partial=00;start_type=ATG;rbs_motif=GGA;rbs_spacer=10bp;gc_cont=0.559	1_1422	1549216	1551852	+	Strict	1500	1679.5	Salmonella enterica gyrA conferring resistance to fluoroquinolones	99.89	3003926	protein variant model	D87Y	D87Y:1545	fluoroquinolone antibiotic	antibiotic target alteration	fluoroquinolone resistant gyrA	ATGAGCGACCTTGCGAGAGAAATTACACCGGTCAACATTGAGGAAGAGCTGAAAAGCTCCTATCTGGATTATGCGATGTCGGTCATTGTTGGCCGTGCGCTGCCGGATGTCCGAGATGGCCTGAAGCCGGTACACCGTCGCGTACTTTACGCCATGAACGTATTGGGCAATGACTGGAACAAAGCCTATAAAAAATCTGCCCGTGTCGTTGGTGACGTAATCGGTAAATACCATCCCCACGGCGATTCCGCAGTGTATTACACCATCGTTCGTATGGCGCAGCCATTCTCGCTGCGTTACATGCTGGTGGATGGTCAGGGTAACTTCGGTTCTATTGACGGCGACTCCGCGGCGGCAATGCGTTATACGGAGATCCGTCTGGCGAAAATCGCCCACGAA…	MSDLAREITPVNIEEELKSSYLDYAMSVIVGRALPDVRDGLKPVHRRVLYAMNVLGNDWNKAYKKSARVVGDVIGKYHPHGDSAVYYTIVRMAQPFSLRYMLVDGQGNFGSIDGDSAAAMRYTEIRLAKIAHELMADLEKETVDFVDNYDGTEKIPDVMPTKIPNLLVNGSSGIAVGMATNIPPHNLTEVINGCLAYIDNEDISIEGLMEHIPGPDFPTAAIINGRRGIEEAYRTGRGKVYIRARAEVEADAKTGRETIIVHEIPYQVNKARLIEKIAELVKDKRVEGISALRDESDKDGMRIVIEVKRDAVGEVVLNNLYSQTQLQVSFGINMVALHHGQPKIMNLKDIISAFVRHRREVVTRRTIFELRKARDRAHILEALAIALANIDPIIELIRR…	MSDLAREITPVNIEEELKSSYLDYAMSVIVGRALPDVRDGLKPVHRRVLYAMNVLGNDWNKAYKKSARVVGDVIGKYHPHGDSAVYDTIVRMAQPFSLRYMLVDGQGNFGSIDGDSAAAMRYTEIRLAKIAHELMADLEKETVDFVDNYDGTEKIPDVMPTKIPNLLVNGSSGIAVGMATNIPPHNLTEVINGCLAYIDNEDISIEGLMEHIPGPDFPTAAIINGRRGIEEAYRTGRGKVYIRARAEVEADAKTGRETIIVHEIPYQVNKARLIEKIAELVKDKRVEGISALRDESDKDGMRIVIEVKRDAVGEVVLNNLYSQTQLQVSFGINMVALHHGQPKIMNLKDIISAFVRHRREVVTRRTIFELRKARDRAHILEALAIALANIDPIIELIRR…	100	gnl|BL_ORD_ID|2156|hsp_num:0	2403			0	2634	ciprofloxacin; nalidixic acid
	1_3565 # 3776437 # 3778203 # -1 # ID=1_3565;partial=00;start_type=ATG;rbs_motif=AGGA;rbs_spacer=12bp;gc_cont=0.547	1_3565	3776437	3778203	-	Strict	500	564.7	Haemophilus influenzae PBP3 conferring resistance to beta-lactam antibiotics	51.85	3004446	protein variant model	D350N, S357N	n/a	cephalosporin; cephamycin; penam	antibiotic target alteration	Penicillin-binding protein mutations conferring resistance to beta-lactam antibiotics	ATGAAAGCAGCGGCAAAAACGCAAAAATCGAAACGCCAGGAAGAACAGACCAACTTCATCAGTTGGCGTTTTGCGTTGCTGTGCGGCTGTATTTTACTGGCGCTGGTTTTTTTACTTGGACGCGCGGCGTGGCTACAGATTATCGCCCCGGATATGCTGGTGCGTCAGGGCGATATGCGTTCGCTGCGTGTTCAGGAAGTCTCCACCTCACGCGGTATGATTACCGACCGTTCCGGGCGTCCACTGGCGGTCAGCGTACCGGTTAAGGCGATCTGGGCCGACCCGAAAGAAGTTCATGACGCCGGCGGCATCAGCGTTGGCGATCGCTGGAAAGCGCTTTCTACTGCGCTCAATATTCCGCTCGATCAGCTCTCCGCCCGTATCAACGCCAACCCGAAA…	MKAAAKTQKSKRQEEQTNFISWRFALLCGCILLALVFLLGRAAWLQIIAPDMLVRQGDMRSLRVQEVSTSRGMITDRSGRPLAVSVPVKAIWADPKEVHDAGGISVGDRWKALSTALNIPLDQLSARINANPKGRFIYLARQVNPDMADYIKKLKLPGIHLREESRRYYPSGEVTAHLIGFTNVDSQGIEGVEKSFDKWLTGQPGERIVRKDRYGRVIEDISSTDSQAAHNLALSIDERLQALVYRELNNAVAFNKAESGSAVLVDVNTGEVLAMANSPSYNPNNLAGTPKDAMRNRTITDVFEPGSTVKPMVVMTALQRGIVNENTVLNTVPYRINGHEIKDVARYSELTLTGVLQKSSNVGVSKLALAMPSSALVDTYSRFGLGKATNLGLVGERSG…	MVKFNSSRKSGKSKKTIRKLTAPETVKQNKPQKVFEKCFMRGRYMLSTVLILLGLCALVARAAYVQSINADTLSNEADKRSLRKDEVLSVRGSILDRNGQLLSVSVPMSAIVADPKTMLKENSLADKERIAALAEELGMTENDLVKKIEKNSKSGYLYLARQVELSKANYIRRLKIKGIILETEHRRFYPRVEEAAHVVGYTDIDGNGIEGIEKSFNSLLVGKDGSRTVRKDKRGNIVAHISDEKKYDAQDVTLSIDEKLQSMVYREIKKAVSENNAESGTAVLVDVRTGEVLAMATAPSYNPNNRVGVKSELMRNRAITDTFEPGSTVKPFVVLTALQRGVVKRDEIIDTTSFKLSGKEIVDVAPRAQQTLDEILMNSSNRGVSRLALRMPPSALMET…	96.39	gnl|BL_ORD_ID|2491|hsp_num:0	2886			63	1758	ceftriaxone; ampicillin; cefaclor; cefotaxime; cefditoren; cefdinir
	1_4096 # 4371328 # 4372512 # -1 # ID=1_4096;partial=00;start_type=ATG;rbs_motif=GAGG;rbs_spacer=8bp;gc_cont=0.540	1_4096	4371328	4372512	-	Strict	700	786.9	Escherichia coli EF-Tu mutants conferring resistance to Pulvomycin	99.49	3003369	protein variant model	R234F	n/a	elfamycin antibiotic	antibiotic target alteration	elfamycin resistant EF-Tu	ATGTCTAAAGAAAAGTTTGAACGTACAAAACCGCACGTTAACGTCGGTACTATCGGCCACGTTGACCATGGTAAAACAACGCTGACCGCTGCCATTACTACCGTACTGGCTAAAACCTACGGCGGTGCCGCCCGCGCATTCGACCAGATCGATAACGCGCCGGAAGAAAAAGCGCGTGGTATCACCATCAACACTTCTCACGTTGAATACGATACCCCGACCCGCCACTACGCACACGTAGACTGCCCGGGGCACGCCGACTATGTTAAAAACATGATCACCGGTGCTGCTCAGATGGACGGCGCGATTCTGGTTGTTGCTGCGACTGACGGCCCGATGCCGCAGACCCGTGAGCACATCCTGCTGGGTCGTCAGGTAGGCGTTCCGTACATCATCGTG…	MSKEKFERTKPHVNVGTIGHVDHGKTTLTAAITTVLAKTYGGAARAFDQIDNAPEEKARGITINTSHVEYDTPTRHYAHVDCPGHADYVKNMITGAAQMDGAILVVAATDGPMPQTREHILLGRQVGVPYIIVFLNKCDMVDDEELLELVEMEVRELLSQYDFPGDDTPIVRGSALKALEGDAEWEAKIIELAGFLDSYIPEPERAIDKPFLLPIEDVFSISGRGTVVTGRVERGIIKVGEEVEIVGIKETQKSTCTGVEMFRKLLDEGRAGENVGVLLRGIKREEIERGQVLAKPGTIKPHTKFESEVYILSKDEGGRHTPFFKGYRPQFYFRTTDVTGTIELPEGVEMVMPGDNIKMVVTLIHPIAMDDGLRFAIREGGRTVGAGVVAKVLG	MLSPEGESTIVRNIAVSKEKFERTKPHVNVGTIGHVDHGKTTLTAAITTVLAKTYGGAARAFDQIDNAPEEKARGITINTSHVEYDTPTRHYAHVDCPGHADYVKNMITGAAQMDGAILVVAATDGPMPQTREHILLGRQVGVPYIIVFLNKCDMVDDEELLELVEMEVRELLSQYDFPGDDTPIVRGSALKALEGDAEWEAKILELAGFLDSYIPEPERAIDKPFLLPIEDVFSISGRGTVVTGRVERGIIKVGEEVEIVGIKETQKSTCTGVEMFRKLLDEGRAGENVGVLLRGIKREEIERGQVLAKPGTIKPHTKFESEVYILSKDEGGRHTPFFKGYRPQFYFRTTDVTGTIELPEGVEMVMPGDNIKMVVTLIHPIAMDDGLRFAIREGGRTV…	96.33	gnl|BL_ORD_ID|1969|hsp_num:0	2158			45	1227	pulvomycin
	1_1549 # 1689763 # 1690485 # -1 # ID=1_1549;partial=00;start_type=ATG;rbs_motif=GAG;rbs_spacer=6bp;gc_cont=0.537	1_1549	1689763	1690485	-	Strict	450	456.8	baeR	94.14	3000828	protein overexpression model	n/a	n/a	aminoglycoside antibiotic; aminocoumarin antibiotic	antibiotic efflux	resistance-nodulation-cell division (RND) antibiotic efflux pump	ATGACTGAATTACCCATTGATGAAAACACGCCGCGCATTTTGATTGTTGAAGATGAACCCAAGCTGGGTCAGCTGCTTATTGACTACTTACGCGCGGCGAGTTACGCCCCCACGCTCATCAATCACGGCGACAAGGTACTGCCGTATGTGCGTCAAACGCCGCCGGATCTGATTCTGCTGGATCTGATGCTGCCGGGTACCGATGGTCTGACGCTATGCCGGGAGATTCGCCGTTTTTCCGACATCCCCATTGTGATGGTCACAGCCAAAATTGAAGAGATCGACCGGCTGCTGGGGCTGGAAATCGGCGCCGATGATTATATCTGTAAGCCTTACAGCCCGCGCGAAGTCGTGGCCCGCGTGAAAACCATTTTGCGCCGCTGTAAACCGCAGCGCGAA…	MTELPIDENTPRILIVEDEPKLGQLLIDYLRAASYAPTLINHGDKVLPYVRQTPPDLILLDLMLPGTDGLTLCREIRRFSDIPIVMVTAKIEEIDRLLGLEIGADDYICKPYSPREVVARVKTILRRCKPQRELQQQDAESPLMIDESRFQASWCGKALDLTPAEFRLLKTLSLEPGKVFSREQLLNHLYDDYRVVTDRTIDSHIKNLRRKLESLDAEQSFIRAVYGVGYRWEADACRLV	MTELPIDENTPRILIVEDEPKLGQLLIDYLRAASYAPSLISHGDQVLPYVRQTPPDLILLDLMLPGTDGLTLCREIRRFSDVPIVMVTAKIEEIDRLLGLEIGADDYICKPYSPREVVARVKTILRRCKPQRELQVLDAESPLIVDESRFQASWRSKLLDLTPAEFRLLKTLSHEPGKVFSREQLLNHLYDDYRVVTDRTIDSHIKNLRRKLEALDAEQSFIRAVYGVGYRWEADACRIA	100	gnl|BL_ORD_ID|1382|hsp_num:0	1337			0	717	neomycin; amikacin; kanamycin A; tobramycin; novobiocin; gentamicin
	1_2150 # 2287823 # 2288257 # -1 # ID=1_2150;partial=00;start_type=TTG;rbs_motif=None;rbs_spacer=None;gc_cont=0.474	1_2150	2287823	2288257	-	Strict	210	273.5	Escherichia coli AcrAB-TolC with MarR mutations conferring resistance to ciprofloxacin and tetracycline	92.36	3003378	protein overexpression model	n/a	n/a	fluoroquinolone antibiotic; cephalosporin; glycylcycline; penam; tetracycline antibiotic; rifamycin antibiotic; phenicol antibiotic; disinfecting agents and antiseptics	antibiotic target alteration; antibiotic efflux	resistance-nodulation-cell division (RND) antibiotic efflux pump	TTGAAAAGCACCAGTGATCTGTTCAATGAAATCATTCCGCTGGGTCGCTTGATCTACATGGTAAATCAAAAAAAAGATCGCCTGTTAAATAACTATTTATCCCCGCTGGATATCACCGCAACACAGTTTAAAGTGCTTTGCTCGATACGCTGCGCGGGATGTATTACCCCGGTTGAACTTAAAAAAGTGCTGTCTGTCGATCTCGGCGCATTGACGCGAATGCTCGACCGCCTGCTGTGCAAAGGCTGGATCGAAAGACTGCCGAATCCTAATGACAAACGCGGCGTACTGGTGAAGCTAACGCCGGACGGCGCGGCAATTTGTGAGCAATGTCATCAACGACCAGGGCAAGACCTGCATCAGGAATTAACAAAAAACTTAACGGCGGACGAAGTGGCA…	LKSTSDLFNEIIPLGRLIYMVNQKKDRLLNNYLSPLDITATQFKVLCSIRCAGCITPVELKKVLSVDLGALTRMLDRLLCKGWIERLPNPNDKRGVLVKLTPDGAAICEQCHQRPGQDLHQELTKNLTADEVATLEYLLKKILP	MKSTSDLFNEIIPLGRLIHMVNQKKDRLLNEYLSPLDITAAQFKVLCSIRCAACITPVELKKVLSVDLGALTRMLDRLVCKGWVERLPNPNDKRGVLVKLTTGGAAICEQCHQLVGQDLHQELTKNLTADEVATLEYLLKKVLP	100	gnl|BL_ORD_ID|1983|hsp_num:0	431			0	432	tigecycline; ciprofloxacin; tetracycline; rifampin; chloramphenicol; ampicillin; cefalotin; triclosan
	1_4000 # 4243160 # 4243618 # -1 # ID=1_4000;partial=00;start_type=ATG;rbs_motif=AGG;rbs_spacer=11bp;gc_cont=0.549	1_4000	4243160	4243618	-	Strict	300	300.4	Escherichia coli soxR with mutation conferring antibiotic resistance	96.05	3003381	protein overexpression model	n/a	n/a	fluoroquinolone antibiotic; cephalosporin; glycylcycline; penam; tetracycline antibiotic; rifamycin antibiotic; phenicol antibiotic; disinfecting agents and antiseptics	antibiotic target alteration; antibiotic efflux	ATP-binding cassette (ABC) antibiotic efflux pump; major facilitator superfamily (MFS) antibiotic efflux pump; resistance-nodulation-cell division (RND) antibiotic efflux pump	ATGGAAAAAAAATCTCCCCGTTTAAAAGCCTTACTGACGCCGGGGGAAGTTGCGAAACGTAGCGGTGTTGCTGTGTCCGCCCTGCACTTCTATGAAAGCAAAGGGCTAATTACCAGTATCCGTAATAGCGGTAACCAACGGCGATACAAGCGTGACGTGTTGCGTTATGTCGCGATTATCAAGATCGCCCAGCGTATCGGCATCCCGCTGGCAACTATCGGCGACGCGTTTGGTATCTTGCCGGAAGGACATACGTTAAGCGCGAAAGAGTGGAAGCAGCTCTCCTCGCAGTGGCGCGAAGAGTTAGACCGACGTATTCATACGCTGGTGGCGTTGCGCGATGAGCTGGACGGTTGTATCGGCTGCGGCTGTTTATCGCGTAGCGACTGTCCGCTGCGA…	MEKKSPRLKALLTPGEVAKRSGVAVSALHFYESKGLITSIRNSGNQRRYKRDVLRYVAIIKIAQRIGIPLATIGDAFGILPEGHTLSAKEWKQLSSQWREELDRRIHTLVALRDELDGCIGCGCLSRSDCPLRNPGDRLGEHGTGARLLEDD	MEKKLPRIKALLTPGEVAKRSGVAVSALHFYESKGLITSIRNSGNQRRYKRDVLRYVAIIKIAQRIGIPLATIGEAFGVLPEGHTLSAKEWKQLSSQWREELDRRIHTLVALRDELDGCIGCGCLSRSDCPLRNPGDRLGEEGTGARLLEDEQN	98.7	gnl|BL_ORD_ID|1972|hsp_num:0	1005			0	456	tigecycline; ciprofloxacin; tetracycline; rifampin; chloramphenicol; ampicillin; nalidixic acid; norfloxacin; cefalotin; triclosan
	1_4001 # 4243705 # 4244028 # 1 # ID=1_4001;partial=00;start_type=ATG;rbs_motif=GAGG;rbs_spacer=7bp;gc_cont=0.515	1_4001	4243705	4244028	+	Strict	200	209.1	Escherichia coli soxS with mutation conferring antibiotic resistance	95.33	3003511	protein overexpression model	n/a	n/a	fluoroquinolone antibiotic; monobactam; carbapenem; cephalosporin; glycylcycline; cephamycin; penam; tetracycline antibiotic; rifamycin antibiotic; phenicol antibiotic; penem; disinfecting agents and antiseptics	antibiotic target alteration; antibiotic efflux; reduced permeability to antibiotic	ATP-binding cassette (ABC) antibiotic efflux pump; major facilitator superfamily (MFS) antibiotic efflux pump; resistance-nodulation-cell division (RND) antibiotic efflux pump; General Bacterial Porin with reduced permeability to beta-lactams	ATGTCGCATCAGCAGATAATTCAGACCCTTATCGAATGGATTGATGAACATATCGACCAACCGCTAAACATTGATGTGGTGGCAAAAAAATCGGGCTACTCCAAGTGGTATTTGCAGCGGATGTTTCGTACGGTAACGCATCAAACATTAGGCGAGTATATTCGCCAGCGCCGTCTCCTGTTGGCGGCCGTTGAGCTACGAACGACCGAGCGCCCGATTTTTGATATCGCGATGGACCTGGGCTATGTATCGCAGCAAACCTTCTCGCGTGTATTCCGCCGCGAGTTCGATCGCACTCCCAGCGATTACCGTCACCGCCTGTAG	MSHQQIIQTLIEWIDEHIDQPLNIDVVAKKSGYSKWYLQRMFRTVTHQTLGEYIRQRRLLLAAVELRTTERPIFDIAMDLGYVSQQTFSRVFRREFDRTPSDYRHRL	MSHQKIIQDLIAWIDEHIDQPLNIDVVAKKSGYSKWYLQRMFRTVTHQTLGDYIRQRRLLLAAVELRTTERPIFDIAMDLGYVSQQTFSRVFRRQFDRTPSDYRHRL	100	gnl|BL_ORD_ID|1974|hsp_num:0	2066			0	321	tigecycline; ciprofloxacin; tetracycline; rifampin; chloramphenicol; ampicillin; norfloxacin; cefalotin; triclosan; enrofloxacin
