# Supplementary material for: Antimicrobial resistance and plasmid-associated virulence genes in Salmonella isolated from pigs, pork, and humans in border provinces of Thailand and neighboring countries
Source: PeerJ. 2025 Aug 25;13:e19884. doi: 10.7717/peerj.19884 (PMC12393075; doi:10.7717/peerj.19884)
Supplement: Supplemental Information 3 [file peerj-13-19884-s003.xlsx]

## Sheet: ID_SA607
Isolate ID	mge_no	name	synonyms	prediction method	type	allele_len	depth	e_value	identity	coverage	gaps	substitution	contig	start	stop	cigar
SA607	2	ISSty2		alignment to reference	Insertion sequence	1245		0	0.968229	0.98888	14	26	1 length=4717634 depth=1.00x circular=true	2837510	2838754	M459 I13 M773 I1 M13
	4	ISKpn2		alignment to reference	Insertion sequence	1294		0	0.963303	0.987749	16	32	1 length=4717634 depth=1.00x circular=true	1935250	1936543	M1136 D1 M62 I2 M1 I8 M1 I4 M7 D1 M85
	7	ISEcl10		alignment to reference	Insertion sequence	1207		0	0.932063	1	0	82	1 length=4717634 depth=1.00x circular=true	1151379	1152585	M1207
	8	ISEcl10		alignment to reference	Insertion sequence	1206		0	0.940348	0.999171	1	71	1 length=4717634 depth=1.00x circular=true	4057211	4058416	M868 I1 M338
	41	MITEEc1		alignment to reference	Miniature Inverted Repeat	123		7.636e-42	0.934959	1	0	8	1 length=4717634 depth=1.00x circular=true	1138610	1138732	M123
	42	MITEEc1		alignment to reference	Miniature Inverted Repeat	122		2.74639e-41	0.934426	0.99187	0	8	1 length=4717634 depth=1.00x circular=true	1316475	1316596	M122
	73	ISSen7		alignment to reference	Insertion sequence	1247		0	0.985565	0.996782	4	14	2 length=59372 depth=1.01x circular=true	33581	34827	M1018 D4 M225

## Sheet: ID_SA608
Isolate ID	mge_no	name	synonyms	prediction method	type	allele_len	depth	e_value	identity	coverage	gaps	substitution	contig	start	stop	cigar
SA608	2	ISSty2		alignment to reference	Insertion sequence	1245		0	0.968229	0.98888	14	26	1 length=4717402 depth=1.00x circular=true	2837510	2838754	M459 I13 M773 I1 M13
	4	ISKpn2		alignment to reference	Insertion sequence	1294		0	0.963303	0.987749	16	32	1 length=4717402 depth=1.00x circular=true	1935250	1936543	M1136 D1 M62 I2 M1 I8 M1 I4 M7 D1 M85
	7	ISEcl10		alignment to reference	Insertion sequence	1207		0	0.932063	1	0	82	1 length=4717402 depth=1.00x circular=true	1151379	1152585	M1207
	8	ISEcl10		alignment to reference	Insertion sequence	1206		0	0.940348	0.999171	1	71	1 length=4717402 depth=1.00x circular=true	4057211	4058416	M868 I1 M338
	41	MITEEc1		alignment to reference	Miniature Inverted Repeat	123		7.63562e-42	0.934959	1	0	8	1 length=4717402 depth=1.00x circular=true	1138610	1138732	M123
	42	MITEEc1		alignment to reference	Miniature Inverted Repeat	122		2.74626e-41	0.934426	0.99187	0	8	1 length=4717402 depth=1.00x circular=true	1316475	1316596	M122
	73	ISSen7		alignment to reference	Insertion sequence	1247		0	0.985565	0.996782	4	14	2 length=59372 depth=0.58x circular=true	33581	34827	M1018 D4 M225

## Sheet: ID_SA615
Isolate ID	mge_no	name	synonyms	prediction method	type	allele_len	depth	e_value	identity	coverage	gaps	substitution	contig	start	stop	cigar
SA615	1	ISKpn2		alignment to reference	Insertion sequence	1294		0	0.963303	0.987749	16	32	1 length=4685645 depth=1.00x circular=true	1903397	1904690	M1136 D1 M62 I2 M1 I8 M1 I4 M7 D1 M85
	3	ISSty2		alignment to reference	Insertion sequence	1245		0	0.965846	0.98888	14	29	1 length=4685645 depth=1.00x circular=true	2805643	2806887	M459 I13 M773 I1 M13
	7	ISEcl10		alignment to reference	Insertion sequence	1207		0	0.932063	1	0	82	1 length=4685645 depth=1.00x circular=true	1119532	1120738	M1207
	8	ISEcl10		alignment to reference	Insertion sequence	1206		0	0.940348	0.999171	1	71	1 length=4685645 depth=1.00x circular=true	4025663	4026868	M868 I1 M338
	41	MITEEc1		alignment to reference	Miniature Inverted Repeat	123		7.58422e-42	0.934959	1	0	8	1 length=4685645 depth=1.00x circular=true	1106763	1106885	M123
	42	MITEEc1		alignment to reference	Miniature Inverted Repeat	122		2.72777e-41	0.934426	0.99187	0	8	1 length=4685645 depth=1.00x circular=true	1284615	1284736	M122
	73	ISSen7		alignment to reference	Insertion sequence	1247		0	0.985565	0.996782	4	14	2 length=59372 depth=0.73x circular=true	33581	34827	M1018 D4 M225
	75	Tn2		alignment to reference	Unit transposon	4950		0	0.99798	1	0	10	3 length=45040 depth=0.94x circular=true	6872	11821	M4950

## Sheet: ID_SA616
Isolate ID	mge_no	name	synonyms	prediction method	type	allele_len	depth	e_value	identity	coverage	gaps	substitution	contig	start	stop	cigar
SA616	1	ISKpn2		alignment to reference	Insertion sequence	1294		0	0.963303	0.987749	16	32	1 length=4685645 depth=1.00x circular=true	1903397	1904690	M1136 D1 M62 I2 M1 I8 M1 I4 M7 D1 M85
	3	ISSty2		alignment to reference	Insertion sequence	1245		0	0.965846	0.98888	14	29	1 length=4685645 depth=1.00x circular=true	2805643	2806887	M459 I13 M773 I1 M13
	7	ISEcl10		alignment to reference	Insertion sequence	1207		0	0.932063	1	0	82	1 length=4685645 depth=1.00x circular=true	1119532	1120738	M1207
	8	ISEcl10		alignment to reference	Insertion sequence	1206		0	0.940348	0.999171	1	71	1 length=4685645 depth=1.00x circular=true	4025663	4026868	M868 I1 M338
	41	MITEEc1		alignment to reference	Miniature Inverted Repeat	123		7.58422e-42	0.934959	1	0	8	1 length=4685645 depth=1.00x circular=true	1106763	1106885	M123
	42	MITEEc1		alignment to reference	Miniature Inverted Repeat	122		2.72777e-41	0.934426	0.99187	0	8	1 length=4685645 depth=1.00x circular=true	1284615	1284736	M122
	73	ISSen7		alignment to reference	Insertion sequence	1247		0	0.985565	0.996782	4	14	2 length=59372 depth=0.66x circular=true	33581	34827	M1018 D4 M225
	75	Tn2		alignment to reference	Unit transposon	4950		0	0.99798	1	0	10	3 length=45040 depth=0.91x circular=true	6872	11821	M4950

## Sheet: ID_SA617
Isolate ID	mge_no	name	synonyms	prediction method	type	allele_len	depth	e_value	identity	coverage	gaps	substitution	contig	start	stop	cigar
SA617	1	ISKpn2		alignment to reference	Insertion sequence	1294		0	0.963303	0.987749	16	32	1 length=4685645 depth=1.00x circular=true	1903397	1904690	M1136 D1 M62 I2 M1 I8 M1 I4 M7 D1 M85
	3	ISSty2		alignment to reference	Insertion sequence	1245		0	0.965846	0.98888	14	29	1 length=4685645 depth=1.00x circular=true	2805643	2806887	M459 I13 M773 I1 M13
	7	ISEcl10		alignment to reference	Insertion sequence	1207		0	0.932063	1	0	82	1 length=4685645 depth=1.00x circular=true	1119532	1120738	M1207
	8	ISEcl10		alignment to reference	Insertion sequence	1206		0	0.940348	0.999171	1	71	1 length=4685645 depth=1.00x circular=true	4025663	4026868	M868 I1 M338
	41	MITEEc1		alignment to reference	Miniature Inverted Repeat	123		7.58422e-42	0.934959	1	0	8	1 length=4685645 depth=1.00x circular=true	1106763	1106885	M123
	42	MITEEc1		alignment to reference	Miniature Inverted Repeat	122		2.72777e-41	0.934426	0.99187	0	8	1 length=4685645 depth=1.00x circular=true	1284615	1284736	M122
	73	ISSen7		alignment to reference	Insertion sequence	1247		0	0.985565	0.996782	4	14	2 length=59372 depth=0.90x circular=true	33581	34827	M1018 D4 M225
	75	Tn2		alignment to reference	Unit transposon	4950		0	0.99798	1	0	10	3 length=45040 depth=1.29x circular=true	6872	11821	M4950
