# Supplementary material for: Antimicrobial resistance and plasmid-associated virulence genes in Salmonella isolated from pigs, pork, and humans in border provinces of Thailand and neighboring countries
Source: PeerJ. 2025 Aug 25;13:e19884. doi: 10.7717/peerj.19884 (PMC12393075; doi:10.7717/peerj.19884)
Supplement: Supplemental Information 4 [file peerj-13-19884-s004.xlsx]

## Sheet: Summary genomic profile
Isolates ID	Accession number	MLST	Genome size (bp)	CG content	Coding genes	Plasmid type/Chomosome	Chromosome/plasmid size	Plasmid replicon	Plasmid-associated virulence gens	Resistance genes via Resfinder	Accession number of chromosome/plasmid
SA607	SAMN37159800	11	4777006	0.522	4382	Chromosome	4717634	-	-	aac(6')-Iaa, gyrA mutation (p.D87Y)	CP133435.1
						Virulence plasmid	59372	IncFIB(S)/ IncFII(S)	spvBCD, pefABCD, rck, mig-5	ND	CP133436.1
SA608	SAMN37160125	11	4776774	0.522	4381	Chromosome	4717402	-	ND	aac(6')-Iaa, gyrA mutation (p.D87Y)	CP133438.1
						Virulence plasmid	59372	IncFIB(S)/ IncFII(S)	spvBCD, pefABCD, rck, mig-5	ND	CP133439.1
SA615	SAMN37156895	11	4790057	0.521	4394	Chromosome	4685645	-	-	aac(6')-Iaa, gyrA mutation (p.D87Y)	CP133426.1
						Virulence plasmid	59372	IncFIB(S)/ IncFII(S)	spvBCD, pefABCD, rck, mig-5	ND	CP133427.1
						Resistant plasmid	45040	IncX1	ND	blaTEM-1B, blaTEM-106, blaTEM-126, blaTEM-135, blaTEM-220	CP133428.1
SA616	SAMN37156981	11	4790057	0.521	4394	Chromosome	4685645	-	-	aac(6')-Iaa, gyrA mutation (p.D87Y)	CP133429.1
						Virulence plasmid	59372	IncFIB(S)/ IncFII(S)	spvBCD, pefABCD, rck, mig-5	ND	CP133430.1
						Resistance plasmid	45040	IncX1	ND	blaTEM-1B, blaTEM-106, blaTEM-126, blaTEM-135, blaTEM-220	CP133431.1
SA617	SAMN37156982	11	4790057	0.521	4394	Chromosome	4685645	-	-	aac(6')-Iaa, gyrA mutation (p.D87Y)	NZ_CP133432.1
						Virulence plasmid	59372	IncFIB(S)/ IncFII(S)	spvBCD, pefABCD, rck, mig-5	ND	NZ_CP133433.1
						Resistance plasmid	45040	IncX1	ND	blaTEM-1B, blaTEM-106, blaTEM-126, blaTEM-135, blaTEM-220	NZ_CP133434.1

## Sheet: ResFinder
Isolate ID	ResFinder identified
	Resistance gene									Mutation
	gene	Identity	Alignment Length/Gene Length	Coverage	Position in reference	Contig	Position in contig	Phenotype	Accession no.	Mutation	Nucleotide change	Amino acid change	Resistance	PMID	position
SA607	aac(6')-Iaa	96.35	438/438	100	1..438	1 length=4717634 depth=1.00x circular=true	2425023..2425460	Amikacin, Tobramycin	NC_003197	gyrA p.D87Y	GAC -> TAC	D -> Y	Nalidixic Acid, Ciprofloxacin	7492118	1581069..1583705
SA608	aac(6')-Iaa	96.35	438/438	100	1..438	1 length=4717402 depth=1.00x circular=true	2425023..2425460	Amikacin, Tobramycin	NC_003197	gyrA p.D87Y	GAC -> TAC	D -> Y	Nalidixic Acid, Ciprofloxacin	7492118	1581069..1583705
SA615	aac(6')-Iaa	96.35	438/438	100	1..438	con1_SA615 Salmonella enterica subsp. enterica serovar Enteritidis strain SA615 chromosome, complete genome	2393159..2393596	Amikacin, Tobramycin	NC_003197	gyrA p.D87gyrA p.D87Y GAC -> TAC D -> Y Nalidixic Acid, Ciprofloxacin 7492118 1549216..1551852 Y	GAC -> TAC	D -> Y	Nalidixic Acid, Ciprofloxacin	7492118	1581069..1583705
	blaTEM-220	99.88	861/861	100	1..861	con3_SA615 Salmonella enterica subsp. enterica serovar Enteritidis strain SA615 plasmid unnamed3, complete sequence	7019..7879	Unknown Beta-lactam	KM998962
	blaTEM-135	99.88	861/861	100	1..861	con3_SA615 Salmonella enterica subsp. enterica serovar Enteritidis strain SA615 plasmid unnamed3, complete sequence	7019..7879	Amoxicillin, Ampicillin, Cephalothin, Piperacillin, Ticarcillin	GQ896333
	blaTEM-126	99.88	861/861	100	1..861	con3_SA615 Salmonella enterica subsp. enterica serovar Enteritidis strain SA615 plasmid unnamed3, complete sequence	7019..7879	Amoxicillin, Ampicillin, Aztreonam, Cefepime, Cefotaxime, Ceftazidime, Ceftriaxone, Piperacillin, Ticarcillin	AY628199
	blaTEM-106	99.88	861/861	100	1..861	con3_SA615 Salmonella enterica subsp. enterica serovar Enteritidis strain SA615 plasmid unnamed3, complete sequence	7019..7879	Amoxicillin, Ampicillin, Aztreonam, Cefepime, Cefotaxime, Ceftazidime, Ceftriaxone, Piperacillin, Ticarcillin	AY101578
	blaTEM-1B	99.88	861/861	100	1..861	con3_SA615 Salmonella enterica subsp. enterica serovar Enteritidis strain SA615 plasmid unnamed3, complete sequence	7019..7879	Amoxicillin, Ampicillin, Cephalothin, Piperacillin, Ticarcillin	AY458016
SA616	aac(6')-Iaa	96.35	438/438	100	1..438	con1_SA616 Salmonella enterica subsp. enterica serovar Enteritidis strain SA616 chromosome, complete genome	2393159..2393596	Amikacin, Tobramycin	NC_003197	gyrA p.D87Y	GAC -> TAC	D -> Y	Nalidixic Acid, Ciprofloxacin	7492118	1549216..1551852
	blaTEM-220	99.88	861/861	100	1..861	con3_SA616 Salmonella enterica subsp. enterica serovar Enteritidis strain SA616 plasmid unnamed3, complete sequence	7019..7879	Unknown Beta-lactam	KM998962
	blaTEM-135	99.88	861/861	100	1..861	con3_SA616 Salmonella enterica subsp. enterica serovar Enteritidis strain SA616 plasmid unnamed3, complete sequence	7019..7879	Amoxicillin, Ampicillin, Cephalothin, Piperacillin, Ticarcillin	GQ896333
	blaTEM-126	99.88	861/861	100	1..861	con3_SA616 Salmonella enterica subsp. enterica serovar Enteritidis strain SA616 plasmid unnamed3, complete sequence	7019..7879	Amoxicillin, Ampicillin, Aztreonam, Cefepime, Cefotaxime, Ceftazidime, Ceftriaxone, Piperacillin, Ticarcillin	AY628199
	blaTEM-106	99.88	861/861	100	1..861	con3_SA616 Salmonella enterica subsp. enterica serovar Enteritidis strain SA616 plasmid unnamed3, complete sequence	7019..7879	Amoxicillin, Ampicillin, Aztreonam, Cefepime, Cefotaxime, Ceftazidime, Ceftriaxone, Piperacillin, Ticarcillin	AY101578
	blaTEM-1B	99.88	861/861	100	1..861	con3_SA616 Salmonella enterica subsp. enterica serovar Enteritidis strain SA616 plasmid unnamed3, complete sequence	7019..7879	Amoxicillin, Ampicillin, Cephalothin, Piperacillin, Ticarcillin	AY458016
SA617	aac(6')-Iaa	96.35	438/438	100	1..438	con1_SA617 Salmonella enterica subsp. enterica serovar Enteritidis strain SA617 chromosome, complete genome	2393159..2393596	Amikacin, Tobramycin	NC_003197	gyrA p.D87Y	GAC -> TAC	D -> Y	Nalidixic Acid, Ciprofloxacin	7492118	1549216..1551852
	blaTEM-220	99.88	861/861	100	1..861	con3_SA617 Salmonella enterica subsp. enterica serovar Enteritidis strain SA617 plasmid unnamed3, complete sequence	7019..7879	Unknown Beta-lactam	KM998962
	blaTEM-135	99.88	861/861	100	1..861	con3_SA617 Salmonella enterica subsp. enterica serovar Enteritidis strain SA617 plasmid unnamed3, complete sequence	7019..7879	Amoxicillin, Ampicillin, Cephalothin, Piperacillin, Ticarcillin	GQ896333
	blaTEM-126	99.88	861/861	100	1..861	con3_SA617 Salmonella enterica subsp. enterica serovar Enteritidis strain SA617 plasmid unnamed3, complete sequence	7019..7879	Amoxicillin, Ampicillin, Aztreonam, Cefepime, Cefotaxime, Ceftazidime, Ceftriaxone, Piperacillin, Ticarcillin	AY628199
	blaTEM-106	99.88	861/861	100	1..861	con3_SA617 Salmonella enterica subsp. enterica serovar Enteritidis strain SA617 plasmid unnamed3, complete sequence	7019..7879	Amoxicillin, Ampicillin, Aztreonam, Cefepime, Cefotaxime, Ceftazidime, Ceftriaxone, Piperacillin, Ticarcillin	AY101578
	blaTEM-1B	99.88	861/861	100	1..861	con3_SA617 Salmonella enterica subsp. enterica serovar Enteritidis strain SA617 plasmid unnamed3, complete sequence	7019..7879	Amoxicillin, Ampicillin, Cephalothin, Piperacillin, Ticarcillin	AY458016

## Sheet: CARD
Isolate ID	ORF_ID	Contig	Start	Stop	Orientation	Cut_Off	Pass_Bitscore	Best_Hit_Bitscore	Best_Hit_ARO	Best_Identities	ARO	Model_type	SNPs_in_Best_Hit_ARO	Other_SNPs	Drug Class	Resistance Mechanism	AMR Gene Family	Predicted_DNA	Predicted_Protein	CARD_Protein_Sequence	Percentage Length of Reference Sequence	ID	Model_ID	Nudged	Note	Hit_Start	Hit_End	Antibiotic
SA607	1_369 # 421789 # 422421 # -1 # ID=1_369;partial=00;start_type=ATG;rbs_motif=AGGA;rbs_spacer=9bp;gc_cont=0.506	1_369	421789	422421	-	Strict	400	418.3	CRP	99.05	3000518	protein homolog model	n/a	n/a	macrolide antibiotic; fluoroquinolone antibiotic; penam	antibiotic efflux	resistance-nodulation-cell division (RND) antibiotic efflux pump	ATGGTGCTTGGCAAACCGCAAACAGACCCGACTCTTGAATGGTTCTTGTCTCATTGCCACATTCATAAGTACCCGTCAAAGAGCACGCTGATTCACCAGGGTGAAAAAGCAGAAACGCTGTACTACATCGTTAAAGGCTCCGTGGCAGTGCTGATCAAAGATGAAGAAGGGAAAGAAATGATCCTTTCTTATCTGAATCAGGGTGATTTTATTGGTGAACTGGGCCTGTTTGAAGAAGGCCAGGAACGCAGCGCCTGGGTACGTGCGAAAACCGCATGTGAGGTCGCTGAAATTTCCTACAAAAAATTTCGCCAATTAATCCAGGTCAACCCGGATATTCTGATGCGCCTCTCTTCCCAGATGGCTCGTCGCTTACAAGTCACCTCTGAAAAAGTAGGT…	MVLGKPQTDPTLEWFLSHCHIHKYPSKSTLIHQGEKAETLYYIVKGSVAVLIKDEEGKEMILSYLNQGDFIGELGLFEEGQERSAWVRAKTACEVAEISYKKFRQLIQVNPDILMRLSSQMARRLQVTSEKVGNLAFLDVTGRIAQTLLNLAKQPDAMTHPDGMQIKITRQEIGQIVGCSRETVGRILKMLEDQNLISAHGKTIVVYGTR	MVLGKPQTDPTLEWFLSHCHIHKYPSKSKLIHQGEKAETLYYIVKGSVAVLIKDEEGKEMILSYLNQGDFIGELGLFEEGQERSAWVRAKTACEVAEISYKKFRQLIQVNPDILMRLSAQMARRLQVTSEKVGNLAFLDVTGRIAQTLLNLAKQPDAMTHPDGMQIKITRQEIGQIVGCSRETVGRILKMLEDQNLISAHGKTIVVYGTR	100	gnl|BL_ORD_ID|803|hsp_num:0	869			0	630	erythromycin; cloxacillin; oxacillin; norfloxacin
	1_662 # 692198 # 693019 # 1 # ID=1_662;partial=00;start_type=ATG;rbs_motif=AGG;rbs_spacer=9bp;gc_cont=0.536	1_662	692198	693019	+	Strict	500	511.5	bacA	97.07	3002986	protein homolog model	n/a	n/a	peptide antibiotic	antibiotic target alteration	undecaprenyl pyrophosphate related proteins	ATGAGCGATATGCACTCGCTGCTGATAGCGGCAATTTTGGGTGTGGTCGAAGGATTGACGGAGTTTTTGCCGGTATCCAGCACGGGCCATATGATTATTGTGGGTCATCTGCTGGGGTTTGAAGGCGATACGGCCAAGACATTCGAAGTGGTGATTCAACTTGGATCTATTCTGGCGGTCGTGGTGATGTTCTGGCGGCGGTTGTTTGGCCTCATCGGTATTCACTTTGGCCGCCCGCTACAGCGTGAAGGTGAAAGTAAAGGTCGATTAACGTTGATTCACATCCTGCTGGGCATGATTCCGGCGGTGGTGCTGGGGTTAGTCTTTCATGACACGATCAAGTCGCTATTTAACCCAATTAACGTGATGTACGCGCTGGTGGTAGGCGGTCTGTTGCTG…	MSDMHSLLIAAILGVVEGLTEFLPVSSTGHMIIVGHLLGFEGDTAKTFEVVIQLGSILAVVVMFWRRLFGLIGIHFGRPLQREGESKGRLTLIHILLGMIPAVVLGLVFHDTIKSLFNPINVMYALVVGGLLLIAAECLKPKEPRAPGLDDMTYRQAFMIGCFQCLALWPGFSRSGATISGGMLMGVSRYAASEFSFLLAVPMMMGATVLDLYKSWSFLTAADIPMFAVGFVTAFVVALIAIKTFLQLIKRISFIPFAIYRFVVAAAVYVVFF	MSDMHSLLIAAILGVVEGLTEFLPVSSTGHMIIVGHLLGFEGDTAKTFEVVIQLGSILAVVVMFWRRLFGLIGIHFGRPLQHEGESKGRLTLIHILLGMIPAVVLGLLFHDTIKSLFNPINVMYALVVGGLLLIAAECLKPKEPRAPGLDDMTYRQAFMIGCFQCLALWPGFSRSGATISGGMLMGVSRYAASEFSFLLAVPMMMGATALDLYKSWGFLTSGDIPMFAVGFITAFVVALIAIKTFLQLIKRISFIPFAIYRFIVAAAVYVVFF	100	gnl|BL_ORD_ID|1680|hsp_num:0	1820			0	819	bacitracin; bacitracin A; bacitracin B; bacitracin F
	1_1045 # 1095751 # 1095936 # 1 # ID=1_1045;partial=00;start_type=ATG;rbs_motif=AGGAG;rbs_spacer=6bp;gc_cont=0.511	1_1045	1095751	1095936	+	Strict	100	102.4	rsmA	85.25	3005069	protein homolog model	n/a	n/a	fluoroquinolone antibiotic; diaminopyrimidine antibiotic; phenicol antibiotic	antibiotic efflux	resistance-nodulation-cell division (RND) antibiotic efflux pump	ATGCTGATTCTGACTCGTCGAGTTGGTGAGACCCTCATGATTGGCGATGAGGTCACCGTGACAGTTTTAGGGGTGAAGGGCAACCAGGTGCGTATTGGCGTGAACGCCCCGAAAGAAGTTTCTGTCCATCGTGAAGAGATCTACCAGCGTATCCAGGCTGAAAAATCCCAGCAGTCCAGTTACTAA	MLILTRRVGETLMIGDEVTVTVLGVKGNQVRIGVNAPKEVSVHREEIYQRIQAEKSQQSSY	MLILTRRVGETLMVGDDVTVTVLGVKGNQVRIGVNAPKEVAVHREEIYQRIQKEKDQEPNH	100	gnl|BL_ORD_ID|2788|hsp_num:0	3807			0	183	trimethoprim; chloramphenicol
	1_1051 # 1102247 # 1103785 # -1 # ID=1_1051;partial=00;start_type=ATG;rbs_motif=GAGG;rbs_spacer=8bp;gc_cont=0.571	1_1051	1102247	1103785	-	Strict	900	966.5	emrB	95.9	3000074	protein homolog model	n/a	n/a	fluoroquinolone antibiotic	antibiotic efflux	major facilitator superfamily (MFS) antibiotic efflux pump	ATGCAACAGCAAAAACCGCTGGAGGGCGCGCAGCTCGTCATCATGACGATCGCGCTGTCGCTGGCGACATTCATGCAGGTGCTGGACTCCACCATTGCCAACGTGGCGATTCCGACCATCGCCGGGAACCTGGGTTCTTCCCTAAGCCAGGGGACATGGGTTATCACCTCTTTCGGGGTGGCGAACGCTATCTCGATTCCCTTAACCGGCTGGCTGGCGAAACGTTTTGGCGAAGTCAAACTGTTCATGTGGTCGACGGTCGCCTTTGCCGCGGCCTCCTGGGCCTGTGGCGTATCCAGCAGCCTGAATATGCTTATCTTCTTCCGCGTGGTGCAGGGCGTGGTCGCCGGGCCGCTGATTCCGCTCTCGCAAAGCCTGTTGCTGAATAACTATCCGCCT…	MQQQKPLEGAQLVIMTIALSLATFMQVLDSTIANVAIPTIAGNLGSSLSQGTWVITSFGVANAISIPLTGWLAKRFGEVKLFMWSTVAFAAASWACGVSSSLNMLIFFRVVQGVVAGPLIPLSQSLLLNNYPPAKRSIALALWSMTVIVAPICGPILGGYISDNYHWGWIFFINVPIGIAVVLMTLHTLRGRETHTERRRIDAVGLALLVIGIGSLQIMLDRGKELDWFSSQEIIILTVVAVIAISFLIVWELTDDHPIVDLSLFKSRNFTIGCLCISLAYMLYFGAIVLLPQLLQEVYGYTATWAGLASAPVGIIPVILSPIIGRFAHKLDMRRLVTFSFIMYAVCFYWRAWTFEPGMDFGASAWPQFIQGFAVACFFMPLTTITLSGLPPERLAAAS…	MQQQKPLEGAQLVIMTIALSLATFMQVLDSTIANVAIPTIAGNLGSSLSQGTWVITSFGVANAISIPLTGWLAKRVGEVKLFLWSTIAFAIASWACGVSSSLNMLIFFRVIQGIVAGPLIPLSQSLLLNNYPPAKRSIALALWSMTVIVAPICGPILGGYISDNYHWGWIFFINVPIGVAVVLMTLQTLRGRETRTERRRIDAVGLALLVIGIGSLQIMLDRGKELDWFSSQEIIILTVVAVVAICFLIVWELTDDNPIVDLSLFKSRNFTIGCLCISLAYMLYFGAIVLLPQLLQEVYGYTATWAGLASAPVGIIPVILSPIIGRFAHKLDMRRLVTFSFIMYAVCFYWRAYTFEPGMDFGASAWPQFIQGFAVACFFMPLTTITLSGLPPERLAAAS…	100	gnl|BL_ORD_ID|1705|hsp_num:0	1847			0	1536	nalidixic acid
	1_1053 # 1105101 # 1105631 # -1 # ID=1_1053;partial=00;start_type=ATG;rbs_motif=GAGG;rbs_spacer=10bp;gc_cont=0.482	1_1053	1105101	1105631	-	Strict	280	327	emrR	93.14	3000516	protein homolog model	n/a	n/a	fluoroquinolone antibiotic	antibiotic efflux	major facilitator superfamily (MFS) antibiotic efflux pump	ATGGATAGTTCGTTTACGCCCATTGAACAAATGCTAAAATTTCGCGCCAGCCGTCACGAAGACTTTCCTTATCAGGAAATTCTTTTGACTCGTCTTTGTATGCACATGCAAGGCAAGCTCCTGGAAAACCGCAATAAAATGCTGAAGGCTCAAGGGATTAACGAGACGTTGTTTATGGCGTTGATTACGCTGGAGTCTCAGGAAAACCACAGTATTCAGCCGTCTGAATTAAGCTGCGCGCTGGGTTCATCTCGCACCAATGCGACACGCATTGCAGATGAGCTGGAAAAACGCGGCTGGATTGAGCGTCGTGAGAGCGATAACGACCGCCGTTGCCTGCATCTGCAATTAACGGAGAAAGGCCAGGCATTTTTGCAAGAAGTGCTTCCGCCTCAGCAT…	MDSSFTPIEQMLKFRASRHEDFPYQEILLTRLCMHMQGKLLENRNKMLKAQGINETLFMALITLESQENHSIQPSELSCALGSSRTNATRIADELEKRGWIERRESDNDRRCLHLQLTEKGQAFLQEVLPPQHHCLHQLWSSLSTAEKDQLEHITRKLLTRLDQMEQEGTVLEALR	MDSSFTPIEQMLKFRASRHEDFPYQEILLTRLCMHMQSKLLENRNKMLKAQGINETLFMALITLESQENHSIQPSELSCALGSSRTNATRIADELEKRGWIERRESDNDRRCLHLQLTEKGHEFLREVLPPQHNCLHQLWSALSTTEKDQLEQITRKLLSRLDQMEQDGVVLEAMS	100	gnl|BL_ORD_ID|1225|hsp_num:0	1330			0	525	nalidixic acid
	1_1434 # 1546825 # 1548471 # -1 # ID=1_1434;partial=00;start_type=ATG;rbs_motif=GAG;rbs_spacer=6bp;gc_cont=0.541	1_1434	1546825	1548471	-	Strict	400	718.8	ArnT	62.61	3005053	protein homolog model	n/a	n/a	peptide antibiotic	antibiotic target alteration	pmr phosphoethanolamine transferase	ATGATGAAATCGATACGCTATTATCTGGCTTTCGCCGCATTTATCGCGCTCTACTATGTTATTCCTGTCAATAGCCGCCTGCTCTGGCAGCCGGATGAAACGCGCTATGCCGAAATAAGTCGGGAGATGCTGGCGTCTGGCGACTGGATCGTGCCGCATTTTCTGGGATTACGTTATTTTGAAAAACCGATAGCCGGTTACTGGATAAACAGTCTGGGTCAGTGGCTTTTTGGCGCTACCAATTTTGGCGTGCGGGCTGGCGCTATTTTAACGACATTGCTGGCCGCAGCGCTGGTGGCGTGGCTGACGTTCCGCTTATGGCGGGATAAACGTACCGCGTTGCTCGCCTCCGTTATCTTTCTCTCCCTCTTTGCCGTTTACAGTATCGGGACGTATGCG…	MMKSIRYYLAFAAFIALYYVIPVNSRLLWQPDETRYAEISREMLASGDWIVPHFLGLRYFEKPIAGYWINSLGQWLFGATNFGVRAGAILTTLLAAALVAWLTFRLWRDKRTALLASVIFLSLFAVYSIGTYAVLDPMIALWLTAGMCCFWQGMQATTRTGKIGMFLLLGATCGLGVLTKGFLALAVPVVSVLPWVIVQKRWKDFLLYGWLAVLSCFVVVLPWAIAIARREADFWHYFFWVEHIQRFAMSDAQHKAPFWYYLPVLLAGSLPWLGLLPGALKLGWRERNGAFYLLGWTIMPLLFFSIAKGKLPTYVLSCFAPIAILMARFVLHNVKEGVAALRVNGGINLVFGIIGIVAAFVVSSWGPLKSPVWTHIETYKVFCVWGVFTVWAFVGWYSL…	MKSIRYGVSLIALFALYYLLPLNFRLLWQPDETRYAEISREMLATGDWVVPHFLGLRYFEKPIAGYWINSIGQWLFGHNNFGVRFGSVFAITMTALLVAWLAWRIFRDKRVAILSLIIFLTAMLVYAIGTYAVLDPMITLWLALAMCSFWGAVQAHSRSGKILGYVLLGVACGMGVMTKGFLALAVPVVGVLPWVIARKRWREVLTYGWLAVIVCTLVVLPWGLAIAQREPDFWRYFFWVEHIQRFAEKDAQHKAPFWYYIPFLIAGSLPWLALLPGALKRGWLERDEARGALYLLGWVAMPFLFFSIAKGKLPTYILPCFAPLSILMARYALEAAKTGAKALRINGMINLGVGLLGLIAVLVVSPWGFMHKPVWTKIELYKCLLAAIAFAVWALMGWL…	99.46	gnl|BL_ORD_ID|2779|hsp_num:0	3795			0	1653	colistin A; colistin B
	1_1437 # 1551343 # 1552326 # -1 # ID=1_1437;partial=00;start_type=ATG;rbs_motif=AGGA;rbs_spacer=8bp;gc_cont=0.538	1_1437	1551343	1552326	-	Strict	550	554.7	PmrF	87.42	3003578	protein homolog model	n/a	n/a	peptide antibiotic	antibiotic target alteration	pmr phosphoethanolamine transferase	ATGTTTGACGCCGCCCCCATAAAAAAAGTCTCGGTGGTTATTCCTGTCTATAACGAACAGGAAAGCCTGCCGGAATTGATAAGACGCACCACCGCCGCCTGCGAGAGTCTGGGCAAAGCGTGGGAGATTTTATTGATAGATGATGGTAGCAGCGATAGCTCGGCGGAGCTGATGGTTAAGGCGTCCCAGGAAGCCGATAGCCATATCATCTCTATTTTACTCAACCGTAACTACGGTCAACATGCAGCGATCATGGCGGGGTTTAGCCATGTAAGCGGCGATCTCATCATTACGCTGGATGCCGATCTGCAAAACCCGCCGGAAGAGATCCCGCGCCTGGTGGCGAAAGCCGATGAAGGGTTCGATGTGGTAGGCACCGTGCGCCAGAACCGACAGGAC…	MFDAAPIKKVSVVIPVYNEQESLPELIRRTTAACESLGKAWEILLIDDGSSDSSAELMVKASQEADSHIISILLNRNYGQHAAIMAGFSHVSGDLIITLDADLQNPPEEIPRLVAKADEGFDVVGTVRQNRQDSLFRKSASKIINLLIQRTTGKAMGDYGCMLRAYRRPIIDTMLRCHERSTFIPILANIFARRATEIPVHHAEREFGDSKYSFMRLINLMYDLVTCLTTTPLRLLSLLGSVIAIGGFSLSVLLIVLRLALGPQWAAEGVFMLFAVLFTFIGAQFIGMGLLGEYIGRIYNDVRARPRYFVQQVIYPESTPFTEESHQ	MFEIHPVKKVSVVIPVYNEQESLPELIRRTTTACESLGKEYEILLIDDGSSDNSAHMLVEASQAENSHIVSILLNRNYGQHSAIMAGFSHVTGDLIITLDADLQNPPEEIPRLVAKADEGYDVVGTVRQNRQDSWFRKTASKMINRLIQRTTGKAMGDYGCMLRAYRRHIVDAMLHCHERSTFIPILANIFARRAIEIPVHHAEREFGESKYSFMRLINLMYDLVTCLTTTPLRMLSLLGSIIAIGGFSIAVLLVILRLTFGPQWAAEGVFMLFAVLFTFIGAQFIGMGLLGEYIGRIYTDVRARPRYFVQQVIRPSSKENE	101.55	gnl|BL_ORD_ID|1936|hsp_num:0	2014			0	954	polymyxin B
	1_1710 # 1852269 # 1853693 # 1 # ID=1_1710;partial=00;start_type=TTG;rbs_motif=AGG;rbs_spacer=6bp;gc_cont=0.538	1_1710	1852269	1853693	+	Strict	900	909.1	MdtK	99.16	3001327	protein homolog model	n/a	n/a	fluoroquinolone antibiotic	antibiotic efflux	multidrug and toxic compound extrusion (MATE) transporter	TTGAACGTCTCCACTGCCTTACGCCAGGCTGTCGTCCGTACGCCCTGGTATGCCAAACGCAAGAGCTACAAAGTGTTGTTCTGGCGTGAAATCACCCCACTTGCTATCCCTATTTTTCTGGAAAATACCTGTGTTTTGCTAATGGGCGTGCTCAGTACTTTTCTCGTCAGTTGGCTGGGCAAGGAAGCAATGGCGGGCGTGGGGCTTGCCGACAGTTTTAATATGGTAATTATGGCTTTTTTTGCGGCTATCGATCTTGGTACTACGGTGGTGGTTGCCTTTAGCCTGGGCAAGCGCGACAGGCGACGGGCAAGGGCGGCGGCGCGCCAGTCGCTGGTGATTATGACGCTATTTGCCGTTGTGCTGGCAGTGGTCATTCATTATTTCGGCAGTGAAATT…	MNVSTALRQAVVRTPWYAKRKSYKVLFWREITPLAIPIFLENTCVLLMGVLSTFLVSWLGKEAMAGVGLADSFNMVIMAFFAAIDLGTTVVVAFSLGKRDRRRARAAARQSLVIMTLFAVVLAVVIHYFGSEIINIVAGEATSEVKGLALTYLELTVLSYPAAAIALIGSGALRGAGNTKIPLMINGGMNILNIIISSILIYGAFSWQGLGFAGAGLGLTISRYIGAVAIIWVLMIGFNPALRIPLKSYLKPLNFGIIWEVMGIGIPASIESVLFNGGKLLTQMFVAGMGTNVIAGNFIAFSVAALINLPGNALGSASTIITGKRLGTGQIGQAERQLRHVFWMSTIVLTAIAWGTAPFAGLFASFYTQEQDVKEVVKVLLWLNAVFMPIWAAAWVLPS…	MNVSTALRQAVVRTPWYAKRKSYKVLFWREITPLAIPIFLENTCVLLMGVLSTFLVSWLGKEAMAGVGLADSFNMVIMAFFAAIDLGTTVVVAFSLGKRDRRRARAAARQSLVIMTLFAVVLAVVIHYFGSEIINIVAGEATPEVKGLALTYLELTVLSYPAAAIALIGSGALRGAGNTKIPLMINGGMNILNIIISSILIYGAFSWQGLGFAGAGLGLTISRYIGAVAIIWVLMIGFNPALRIPLKSYLKPLNFGIIWEVMGIGIPASIESVLFNGSKLLTQMFVAGMGTNVIAGNFIAFSVAALINLPGNALGSASTIITGKRLGTGQIGQAERQLRHVFWMSTIVLTAIAWGTAPFAGLFASFYTQEQDVKEVVKVLLWLNAAFMPIWAAAWVLPS…	100	gnl|BL_ORD_ID|1649|hsp_num:0	1752			0	1422	ciprofloxacin
	1_2153 # 2282425 # 2282787 # 1 # ID=1_2153;partial=00;start_type=ATG;rbs_motif=AGGAG;rbs_spacer=7bp;gc_cont=0.446	1_2153	2282425	2282787	+	Strict	150	169.1	Klebsiella pneumoniae KpnE	76.67	3004580	protein homolog model	n/a	n/a	macrolide antibiotic; aminoglycoside antibiotic; cephalosporin; tetracycline antibiotic; peptide antibiotic; rifamycin antibiotic; disinfecting agents and antiseptics	antibiotic efflux	small multidrug resistance (SMR) antibiotic efflux pump	ATGTTTTACTGGATTTTATTAGCTCTGGCTATCGCGACTGAAATTACCGGCACGCTCTCAATGAAATGGGCTAGCGTGGGTAATGGCAATGCGGGTTTTATTTTAATGCTGGTGATGATCACGCTGTCATATATATTTCTTTCTTTTGCGGTAAAAAAGATTGCCCTGGGTGTAGCGTATGCCTTATGGGAAGGGATCGGCATTTTATTTATTACCATTTTTAGCGTGCTGCTATTTGATGAAGCATTATCAACCATGAAGATTGCCGGCTTGCTGACGCTGGTCGCCGGCATAGTATTGATCAAATCAGGGACGCGTAAACCCGGCAAACCGGTGAAGGAGGCGACTCGTGCAACAATTTGA	MFYWILLALAIATEITGTLSMKWASVGNGNAGFILMLVMITLSYIFLSFAVKKIALGVAYALWEGIGILFITIFSVLLFDEALSTMKIAGLLTLVAGIVLIKSGTRKPGKPVKEATRATI	MFYWILLALAIIAEITGTLSMKWASVSGGHTGFILMLAMIALSYIFLAFAVKKIALGVAYALWEGIGILLITLFSVLLFDESLSLLKIAGLTTLVIGIVLIKSGTQKKASSQQEVAHAAV	100	gnl|BL_ORD_ID|2715|hsp_num:0	3283			0	360	erythromycin; streptomycin; tetracycline; cefepime; ceftriaxone; rifampin; colistin A; colistin B; triclosan; benzalkonium chloride; chlorhexidine
	1_2154 # 2282774 # 2283103 # 1 # ID=1_2154;partial=00;start_type=GTG;rbs_motif=AGGAG;rbs_spacer=7bp;gc_cont=0.558	1_2154	2282774	2283103	+	Strict	150	189.1	Klebsiella pneumoniae KpnF	87.16	3004583	protein homolog model	n/a	n/a	macrolide antibiotic; aminoglycoside antibiotic; cephalosporin; tetracycline antibiotic; peptide antibiotic; rifamycin antibiotic; disinfecting agents and antiseptics	antibiotic efflux	small multidrug resistance (SMR) antibiotic efflux pump	GTGCAACAATTTGAATGGATACACGGCGCCTGGCTTGGGCTGGCAATAATGCTGGAAATCGCGGCTAACGTACTGTTGAAATTTTCGGACGGCTTTCGCCGTAAATGCTATGGCATCTTATCGCTTGCCGCTGTTCTGGCCGCCTTCAGCGCGCTTTCCCAGGCGGTAAAAGGGATAGACCTGTCGGTGGCGTATGCGTTATGGGGCGGTTTTGGTATTGCCGCCACGCTGGCGGCGGGCTGGGTGCTCTTCGGCCAGCGCTTAAACCCCAAAGGCTGGGTTGGCGTGATATTGCTGCTCGCCGGAATGGTCATGATCAAATTTGCCTGA	MQQFEWIHGAWLGLAIMLEIAANVLLKFSDGFRRKCYGILSLAAVLAAFSALSQAVKGIDLSVAYALWGGFGIAATLAAGWVLFGQRLNPKGWVGVILLLAGMVMIKFA	MQQFEWIHAAWLAIAIVLEIIANVFLKFSDGFRRKIYGILSLAAVLGAFSALSQAVKGIDLSVAYALWGGFGIAATIAAGWVLFGQRLNNKGWAGVILLVAGMVLIKLA	100	gnl|BL_ORD_ID|2717|hsp_num:0	3286			0	327	erythromycin; streptomycin; tetracycline; cefepime; ceftriaxone; rifampin; colistin A; colistin B; triclosan; benzalkonium chloride; chlorhexidine
	1_2191 # 2319284 # 2319667 # -1 # ID=1_2191;partial=00;start_type=ATG;rbs_motif=GAGG;rbs_spacer=7bp;gc_cont=0.471	1_2191	2319284	2319667	-	Strict	230	247.3	marA	95.24	3000263	protein homolog model	n/a	n/a	fluoroquinolone antibiotic; monobactam; carbapenem; cephalosporin; glycylcycline; cephamycin; penam; tetracycline antibiotic; rifamycin antibiotic; phenicol antibiotic; penem; disinfecting agents and antiseptics	antibiotic efflux; reduced permeability to antibiotic	resistance-nodulation-cell division (RND) antibiotic efflux pump; General Bacterial Porin with reduced permeability to beta-lactams	ATGTCCAGACGCAACACTGACGCTATTACTATTCATAGCATTTTGGACTGGATCGAGGATAACCTGGAGTCGCCGCTCTCACTGGAAAAAGTGTCTGAGCGTTCAGGATATTCCAAATGGCACCTGCAACGGATGTTTAAAAAAGAGACCGGTCATTCATTAGGCCAATACATCCGCAGCCGTAAAATGACGGAAATCGCGCAAAAATTAAAAGAGAGCAACGAGCCCATTCTCTATCTGGCGGAACGCTATGGCTTTGAGTCACAGCAAACATTGACCCGGACGTTCAAAAACTACTTTGATGTGCCGCCACACAAATACCGGATCACCAATATGCATGGCGAATCACGGTATATGCTGCCGCTGAACCATGGCAACTACTAG	MSRRNTDAITIHSILDWIEDNLESPLSLEKVSERSGYSKWHLQRMFKKETGHSLGQYIRSRKMTEIAQKLKESNEPILYLAERYGFESQQTLTRTFKNYFDVPPHKYRITNMHGESRYMLPLNHGNY	MSRRNTDAITIHSILDWIEDNLESPLSLEKVSERSGYSKWHLQRMFKKETGHSLGQYIRSRKMTEIAQKLKESNEPILYLAERYGFESQQTLTRTFKNYFDVPPHKYRMTNMQGESRFLHPLNHYNS	100	gnl|BL_ORD_ID|1771|hsp_num:0	1922			0	378	tigecycline; tetracycline; rifampin; chloramphenicol; ampicillin; cefalotin; triclosan
	1_2286 # 2425023 # 2425460 # 1 # ID=1_2286;partial=00;start_type=ATG;rbs_motif=AGGAG;rbs_spacer=7bp;gc_cont=0.523	1_2286	2425023	2425460	+	Strict	275	298.1	AAC(6')-Iy	97.24	3002569	protein homolog model	n/a	n/a	aminoglycoside antibiotic	antibiotic inactivation	AAC(6')	ATGGACATCAGGCAAATGAACAAAACCCATCTGGAGCACTGGCGCGGATTGCGAAAACAGCTCTGGCCCGGTCACCCGGATGACGCCCATCTGGCAGACGGCGAAGAAATCCTGCAAGCCGATCATTTGGCATCATTTGTTGCGATGGCAGACGGGGTGGCGATTGGCTTTGCGGATGCCTCAATCCGCCACGATTATGTCAATGGCTGTGACAGTTCGCCCGTGGCTTTTCTTGAAGGTATTTTTGTTCTCCCCTCGTTCCGTCAACGCGGCGTAGCGAAACAATTGATTGCAGCGGTGCAACGATGGGGAACGAATAAAGGGTGTCGGGAAATGGCCTCTGATACCACGCCGGAAAATACAATTTCCCAGAAAGTTCACCTGGCATTAGGATTTGAG…	MDIRQMNKTHLEHWRGLRKQLWPGHPDDAHLADGEEILQADHLASFVAMADGVAIGFADASIRHDYVNGCDSSPVAFLEGIFVLPSFRQRGVAKQLIAAVQRWGTNKGCREMASDTTPENTISQKVHLALGFEETERVIFYRKRC	MDIRQMNKTHLEHWRGLRKQLWPGHPDDAHLADGEEILQADHLASFIAMADGVAIGFADASIRHDYVNGCDSSPVVFLEGIFVLPSFRQRGVAKQLIAAVQRWGTNKGCREMASDTSPENTISQKVHQALGFEETERVIFYRKRC	100	gnl|BL_ORD_ID|330|hsp_num:0	360			0	435	dibekacin; amikacin; sisomicin; netilmicin; tobramycin; 2'-N-ethylnetilmicin; 5-episisomicin
	1_2444 # 2582082 # 2582495 # 1 # ID=1_2444;partial=00;start_type=ATG;rbs_motif=GAG;rbs_spacer=9bp;gc_cont=0.454	1_2444	2582082	2582495	+	Strict	240	245.7	H-NS	94.89	3000676	protein homolog model	n/a	n/a	macrolide antibiotic; fluoroquinolone antibiotic; cephalosporin; cephamycin; penam; tetracycline antibiotic	antibiotic efflux	major facilitator superfamily (MFS) antibiotic efflux pump; resistance-nodulation-cell division (RND) antibiotic efflux pump	ATGAGCGAAGCACTTAAAATTCTGAACAACATCCGTACTCTTCGTGCGCAGGCAAGAGAATGTACTCTGGAAACGCTTGAAGAAATGCTGGAAAAATTAGAAGTTGTCGTTAATGAGCGTCGTGAAGAAGAAAGCGCTGCTGCTGCTGAAGTGGAAGAACGCACTCGTAAACTGCAACAGTATCGTGAAATGTTAATTGCCGACGGCATTGACCCGAATGAACTGCTGAATAGCATGGCTGCCGCTAAATCCGGTACCAAAGCTAAACGCGCAGCTCGTCCGGCTAAATATAGCTATGTTGACGAAAACGGTGAAACTAAAACCTGGACTGGCCAGGGTCGTACACCGGCTGTAATCAAAAAAGCAATGGAAGAACAAGGTAAGCAACTGGAAGATTTC…	MSEALKILNNIRTLRAQARECTLETLEEMLEKLEVVVNERREEESAAAAEVEERTRKLQQYREMLIADGIDPNELLNSMAAAKSGTKAKRAARPAKYSYVDENGETKTWTGQGRTPAVIKKAMEEQGKQLEDFLIKE	MSEALKILNNIRTLRAQARECTLETLEEMLEKLEVVVNERREEESAAAAEVEERTRKLQQYREMLIADGIDPNELLNSLAAVKSGTKAKRAQRPAKYSYVDENGETKTWTGQGRTPAVIKKAMDEQGKSLDDFLIKQ	100	gnl|BL_ORD_ID|1144|hsp_num:0	1248			0	411	erythromycin; cloxacillin; ciprofloxacin; tetracycline; oxacillin; norfloxacin
	1_2662 # 2796075 # 2796797 # -1 # ID=1_2662;partial=00;start_type=ATG;rbs_motif=None;rbs_spacer=None;gc_cont=0.492	1_2662	2796075	2796797	-	Strict	470	488.4	sdiA	99.58	3000826	protein homolog model	n/a	n/a	fluoroquinolone antibiotic; cephalosporin; glycylcycline; penam; tetracycline antibiotic; rifamycin antibiotic; phenicol antibiotic; disinfecting agents and antiseptics	antibiotic efflux	resistance-nodulation-cell division (RND) antibiotic efflux pump	ATGCAGGAAAATGATTTCTTCACCTGGCGACGCGCAATGTTGTTACGCTTTCAGGAGATGGCGGCAGCAGAGGATGTTTATACTGAATTGCAATATCAGACACAGCGGCTGGAATTTGATTATTATGCCCTGTGTGTTCGTCATCCCGTCCCCTTTACCCGGCCTAAAATATCGCTTCGTACCACTTATCCTCCGGCGTGGGTAACGCATTACCAGTCCGAAAACTATTTTGCGATCGATCCGGTATTAAAGCCGGAAAATTTCAGGCAGGGTCATTTACATTGGGATGACGTGCTATTTCATGAAGCGCAGGCGATGTGGGATGCCGCCCAGCGTTTCGGATTACGCAGAGGCGTAACCCAGTGTGTGATGTTGCCGAACCGGGCGCTGGGCTTTTTA…	MQENDFFTWRRAMLLRFQEMAAAEDVYTELQYQTQRLEFDYYALCVRHPVPFTRPKISLRTTYPPAWVTHYQSENYFAIDPVLKPENFRQGHLHWDDVLFHEAQAMWDAAQRFGLRRGVTQCVMLPNRALGFLSFSRSSLRCSSFTYDEVELRLQLLARESLSALTRFEDDMVMAPEMRFSKREKEILKWTAEGKTSSEIAIILSISENTVNFHQKNMQKKFNAPNKTQIACYAAATGLI	MQENDFFTWRRAMLLRFQEMAAAEDVYTELQYQTQRLEFDYYALCVRHPVPFTRPKISLRTTYPPAWVTHYQSENYFAIDPVLKPENFRQGHLHWDDVLFHEAKAMWDAAQRFGLRRGVTQCVMLPNRALGFLSFSRSSLRCSSFTYDEVELRLQLLARESLSALTRFEDDMVMAPEMRFSKREKEILKWTAEGKTSSEIAIILSISENTVNFHQKNMQKKFNAPNKTQIACYAAATGLI	100	gnl|BL_ORD_ID|208|hsp_num:0	228			0	720	tigecycline; tetracycline; rifampin; chloramphenicol; ampicillin; cefalotin; triclosan
	1_2832 # 2964144 # 2965892 # -1 # ID=1_2832;partial=00;start_type=ATG;rbs_motif=None;rbs_spacer=None;gc_cont=0.516	1_2832	2964144	2965892	-	Strict	1000	1067.4	msbA	96.39	3003950	protein homolog model	n/a	n/a	nitroimidazole antibiotic	antibiotic efflux	ATP-binding cassette (ABC) antibiotic efflux pump	ATGCATAACGATAAAGATCTCTCTACGTGGCAGACCTTCCGCCGACTGTGGCCAACCATAGCGCCTTTTAAAGCAGGTCTGATCGTGGCGGGCATAGCGTTAATTCTCAACGCAGCCAGCGATACCTTCATGCTATCGCTCCTCAAGCCATTACTGGATGATGGTTTCGGTAAAACGGATCGCTCAGTGTTGCTGTGGATGCCGCTGGTGGTTATTGGGCTGATGATATTACGAGGCATCACTAGCTATATCTCCAGCTACTGTATTTCATGGGTGTCAGGCAAGGTGGTAATGACCATGCGCCGTCGCCTGTTTGGCCATATGATGGGAATGCCCGTCGCCTTCTTTGATAAACAGTCTACCGGTACGCTGCTGTCGCGTATTACTTACGATTCAGAA…	MHNDKDLSTWQTFRRLWPTIAPFKAGLIVAGIALILNAASDTFMLSLLKPLLDDGFGKTDRSVLLWMPLVVIGLMILRGITSYISSYCISWVSGKVVMTMRRRLFGHMMGMPVAFFDKQSTGTLLSRITYDSEQVASSSSGALITVVREGASIIGLFIMMFYYSWQLSIILVVLAPIVSIAIRVVSKRFRSISKNMQNTMGQVTTSAEQMLKGHKEVLIFGGQEVETKRFDKVSNKMRLQGMKMVSASSISDPIIQLIASLALAFVLYAASFPSVMDSLTAGTITVVFSSMIALMRPLKSLTNVNAQFQRGMAACQTLFAILDSEQEKDEGKRVIDRATGDLEFRNVTFTYPGREVPALRNINLKIPAGKTVALVGRSGSGKSTIASLITRFYDIDEGH…	MHNDKDLSTWQTFRRLWPTIAPFKAGLIVAGVALILNAASDTFMLSLLKPLLDDGFGKTDRSVLVWMPLVVIGLMILRGITSYVSSYCISWVSGKVVMTMRRRLFGHMMGMPVSFFDKQSTGTLLSRITYDSEQVASSSSGALITVVREGASIIGLFIMMFYYSWQLSIILIVLAPIVSIAIRVVSKRFRNISKNMQNTMGQVTTSAEQMLKGHKEVLIFGGQEVETKRFDKVSNRMRLQGMKMVSASSISDPIIQLIASLALAFVLYAASFPSVMDSLTAGTITVVFSSMIALMRPLKSLTNVNAQFQRGMAACQTLFTILDSEQEKDEGKRVIERATGDVEFRNVTFTYPGRDVPALRNINLKIPAGKTVALVGRSGSGKSTIASLITRFYDIDEGE…	100	gnl|BL_ORD_ID|2183|hsp_num:0	2423			0	1746	metronidazole
	1_2907 # 3052863 # 3054095 # -1 # ID=1_2907;partial=00;start_type=ATG;rbs_motif=GAG;rbs_spacer=5bp;gc_cont=0.554	1_2907	3052863	3054095	-	Strict	700	700.7	Escherichia coli mdfA	87.71	3001328	protein homolog model	n/a	n/a	tetracycline antibiotic; disinfecting agents and antiseptics	antibiotic efflux	major facilitator superfamily (MFS) antibiotic efflux pump	ATGCAGAATCGTTTACAATCAGGCGGCAGGCTGGGACGTCAGGCGCTGCTTTTTCCTCTCTGTCTGGTGCTGTACGAATTTTCTACTTATATTGGCAACGACATGATCCAGCCGGGTATGCTGGCGGTGGTTGAGCAGTATCAGGCGTGCCTGGACTGGGTTCCGACGTCCATGACCGCTTATCTGGCGGGCGGTATGTTCTTACAGTGGCTGCTTGGCCCGTTGTCTGACCGGATTGGCCGTCGTCCCGTGATGCTGGCGGGCGTCGTGTGGTTTATTGTCACCTGCCTGGCGACGTTACTGGCGAAAAACATCGAACAATTTACCTTCCTGCGTTTTTTGCAAGGGATTAGCCTGTGTTTTATCGGCGCTGTAGGGTATGCCGCGATTCAGGAGTCC…	MQNRLQSGGRLGRQALLFPLCLVLYEFSTYIGNDMIQPGMLAVVEQYQACLDWVPTSMTAYLAGGMFLQWLLGPLSDRIGRRPVMLAGVVWFIVTCLATLLAKNIEQFTFLRFLQGISLCFIGAVGYAAIQESFEEAVCIKITALMANVALIAPLLGPLVGAAWVHVLPWEGMFILFAALAAIAFFGLQRAMPETATRRGETLSFKALGRDYRLVIKNRRFVAGALALGFVSLPLLAWIAQSPIIIISGEQLSSYEYGLLQVPVFGALIAGNLVLARLTSRRTVRSLIVMGGWPIVAGLIIAAAATVVSSHAYLWMTAGLSVYAFGIGLANAGLVRLTLFSSDMSKGTVSAAMGMLQMLIFTVGIEVSKHAWLSGGNGLFSLFNLANGILWLLLMLVFL…	MQNKLASGARLGRQALLFPLCLVLYEFSTYIGNDMRQPGMLENVEQYQAGIEWVPTSMNAYLAGGMFIQWLLGPLSDRIGRRPVMLAGVVWFIVTCLAILLAQNIEQFTLLRFLHGISLCFIGAVGYDAIQESFEEAVCIKITALMANVALIAPLLGPLVGASWIHVLPWEGMFVLFAALAAISFFGLQRAMPETATRIGEKLSLKELGRDYKLVLKNGRFVAGALALGFLSLPLLAWIAQSPIIIITGEQLSSYEYGLLQVPIFGALIAGNLLLARLTSRRTVRSLIIMGGWPIMIGLLVAAAATVISSHAYLWMTAGLSIYAFGIGLANAGLVRLTLFASVMSKGTVSAAMGMLQMLIFTVGIEISKHAWLNGGNGLFNLFNLVNGILLLSLMVIFL…	100	gnl|BL_ORD_ID|2417|hsp_num:0	37			0	1221	tetracycline; benzalkonium chloride
	1_3057 # 3212395 # 3213072 # 1 # ID=1_3057;partial=00;start_type=GTG;rbs_motif=GAGGA;rbs_spacer=3bp;gc_cont=0.563	1_3057	3212395	3213072	+	Strict	400	422.9	kdpE	91.96	3003841	protein homolog model	n/a	n/a	aminoglycoside antibiotic	antibiotic efflux	kdpDE	GTGACAAACGTTCTGATTGTTGAAGATGAACAGGCCATCCGCCGCTTTCTGCGCGCCGCGCTGGAAGGCGACGGCCTGCGCGTGTATGAAGCTGAAACATTACAACGTGGTTTACTGGAAGCCGCCACGCGAAAGCCCGATCTGATTATTCTCGATCTCGGCCTGCCGGACGGCGACGGAATCGATTTCATTCGCGACCTGCGTCAGTGGAGCGCAATACCGGTGATTGTCCTTTCCGCCCGCAGCGAAGAAAGCGATAAGATTGCCGCGCTTGACGCCGGAGCTGATGATTACCTGAGCAAGCCATTCGGCATTGGCGAGTTGCAGGCGCGTTTGCGTGTCGCGCTGCGACGGCACGCCGCCAGCCCTAGCGCCGATCCGATCGTCCGTTTTTCCGGC…	MTNVLIVEDEQAIRRFLRAALEGDGLRVYEAETLQRGLLEAATRKPDLIILDLGLPDGDGIDFIRDLRQWSAIPVIVLSARSEESDKIAALDAGADDYLSKPFGIGELQARLRVALRRHAASPSADPIVRFSGVTVDLAARLIHRGDEEIHLTPIEFRLLAVLLNNTGKVLTQRQLLNQVWGPNAVEHSHYLRIYMGHLRQKLEQDPTRPRHFITETGIGYRFMP	MTNVLIVEDEQAIRRFLRTALEGDGMRVFEAETLQRGLLEAATRKPDLIILDLGLPDGDGIEFIRDLRQWSAVPVIVLSARSEESDKIAALDAGADDYLSKPFGIGELQARLRVALRRHSATTAPDPLVKFSDVTVDLAARVIHRGEEEVHLTPIEFRLLAVLLNNAGKVLTQRQLLNQVWGPNAVEHSHYLRIYMGHLRQKLEQDPARPRHFITETGIGYRFML	100	gnl|BL_ORD_ID|2101|hsp_num:0	2331			0	672	kanamycin A
	1_3272 # 3438484 # 3439677 # 1 # ID=1_3272;partial=00;start_type=ATG;rbs_motif=GAGG;rbs_spacer=7bp;gc_cont=0.554	1_3272	3438484	3439677	+	Strict	670	691	Escherichia coli acrA	91.69	3004043	protein homolog model	n/a	n/a	fluoroquinolone antibiotic; cephalosporin; glycylcycline; penam; tetracycline antibiotic; rifamycin antibiotic; phenicol antibiotic; disinfecting agents and antiseptics	antibiotic efflux	resistance-nodulation-cell division (RND) antibiotic efflux pump	ATGAACAAAAACAGAGGGTTAACGCCTCTGGCGGTCGTTCTGATGCTCTCAGGCAGCTTAGCGCTAACAGGATGTGACGACAAACAGGACCAGCAAGGCGGCCAGCAGATGCCAGAAGTTGGAGTTGTCACACTAAAAACGGAACCACTGCAAATCACAACTGAACTTCCGGGTCGTACCGTTGCTTACCGTATCGCCGAAGTTCGCCCACAGGTAAGCGGCATTATCCTGAAGCGTAATTTCGTTGAGGGAAGTGATATCGAAGCGGGAGTCTCTCTCTATCAGATTGATCCTGCGACCTACCAGGCGACTTACGACAGCGCTAAGGGCGATCTGGCAAAAGCGCAGGCCGCCGCGAATATCGCTGAACTGACGGTGAAGCGTTATCAAAAGCTGCTG…	MNKNRGLTPLAVVLMLSGSLALTGCDDKQDQQGGQQMPEVGVVTLKTEPLQITTELPGRTVAYRIAEVRPQVSGIILKRNFVEGSDIEAGVSLYQIDPATYQATYDSAKGDLAKAQAAANIAELTVKRYQKLLGTQYISKQEYDQALADAQQATAAVVAAKAAVETARINLAYTKVTSPISGRIGKSSVTEGALVQNGQASALATVQQLDPIYVDVTQSSNDFLRLKQELANGSLKQENGKAKVDLVTSDGIKFPQSGTLEFSDVTVDQTTGSITLRAIFPNPDHTLLPGMFVRARLQEGTKPTALLVPQQGVTRTPRGDATVLVVGADNKVETRQIVASQAIGDKWLVTDGLKAGDRVVVSGLQKVRPGAQVKVQEITADNKQQAASGDQPAQPRS	MNKNRGFTPLAVVLMLSGSLALTGCDDKQAQQGGQQMPAVGVVTVKTEPLQITTELPGRTSAYRIAEVRPQVSGIILKRNFKEGSDIEAGVSLYQIDPATYQATYDSAKGDLAKAQAAANIAQLTVNRYQKLLGTQYISKQEYDQALADAQQANAAVTAAKAAVETARINLAYTKVTSPISGRIGKSNVTEGALVQNGQATALATVQQLDPIYVDVTQSSNDFLRLKQELANGTLKQENGKAKVSLITSDGIKFPQDGTLEFSDVTVDQTTGSITLRAIFPNPDHTLLPGMFVRARLEEGLNPNAILVPQQGVTRTPRGDATVLVVGADDKVETRPIVASQAIGDKWLVTEGLKAGDRVVISGLQKVRPGVQVKAQEVTADNNQQAASGAQPEQSKS	100	gnl|BL_ORD_ID|2319|hsp_num:0	2661			0	1191	tigecycline; tetracycline; rifampin; chloramphenicol; ampicillin; cefalotin; triclosan
	1_3273 # 3439700 # 3442849 # 1 # ID=1_3273;partial=00;start_type=ATG;rbs_motif=AGGAG;rbs_spacer=10bp;gc_cont=0.543	1_3273	3439700	3442849	+	Strict	1900	1902.5	acrB	94.66	3000216	protein homolog model	n/a	n/a	fluoroquinolone antibiotic; cephalosporin; glycylcycline; penam; tetracycline antibiotic; rifamycin antibiotic; phenicol antibiotic; disinfecting agents and antiseptics	antibiotic efflux	resistance-nodulation-cell division (RND) antibiotic efflux pump	ATGCCTAATTTCTTTATCGATCGCCCTATATTTGCGTGGGTGATCGCCATCATCATCATGTTGGCAGGGGGGCTCGCGATCCTCAAATTGCCGGTAGCGCAATATCCGACGATTGCGCCACCAGCAGTGACGATCTCCGCAACCTACCCTGGCGCTGATGCGAAAACGGTACAGGATACCGTCACGCAGGTTATCGAACAGAATATGAACGGTATCGATAACCTGATGTATATGTCCTCCAACAGTGACTCCACGGGGACCGTGCAGATCACGCTGACCTTTGAATCCGGCACCGATGCGGATATCGCGCAGGTTCAGGTTCAGAACAAGTTGCAACTGGCAATGCCTTTACTTCCCCAGGAAGTACAGCAACAGGGCGTGAGCGTTGAGAAGTCCTCA…	MPNFFIDRPIFAWVIAIIIMLAGGLAILKLPVAQYPTIAPPAVTISATYPGADAKTVQDTVTQVIEQNMNGIDNLMYMSSNSDSTGTVQITLTFESGTDADIAQVQVQNKLQLAMPLLPQEVQQQGVSVEKSSSSFLMVVGVINTDGTMTQEDISDYVAANMKDPISRTSGVGDVQLFGSQYAMRIWMNPTELTKYQLTPVDVINAIKAQNAQVAAGQLGGTPPVKGQQLNASIIAQTRLTSTDEFGKILLKVNQDGSQVRLRDVAKIELGGENYDVIAKFNGQPASGLGIKLATGANALDTATAIRAELKKMEPFFPPGMKIVYPYDTTPFVKISIHEVVKTLVEAIILVFLVMYLFLQNFRATLIPTIAVPVVLLGTFAVLAAFGFSINTLTMFGMV…	MPNFFIDRPIFAWVIAIIIMLAGGLAILKLPVAQYPTIAPPAVTISASYPGADAKTVQDTVTQVIEQNMNGIDNLMYMSSNSDSTGTVQITLTFESGTDADIAQVQVQNKLQLAMPLLPQEVQQQGVSVEKSSSSFLMVVGVINTDGTMTQEDISDYVAANMKDAISRTSGVGDVQLFGSQYAMRIWMNPNELNKFQLTPVDVITAIKAQNAQVAAGQLGGTPPVKGQQLNASIIAQTRLTSTEEFGKILLKVNQDGSRVLLRDVAKIELGGENYDIIAEFNGQPASGLGIKLATGANALDTAAAIRAELAKMEPFFPSGLKIVYPYDTTPFVKISIHEVVKTLVEAIILVFLVMYLFLQNFRATLIPTIAVPVVLLGTFAVLAAFGFSINTLTMFGMV…	100	gnl|BL_ORD_ID|1011|hsp_num:0	1104			0	3144	tigecycline; acriflavine; tetracycline; rifampin; chloramphenicol; ampicillin; cefalotin; triclosan, colistin?
	1_3368 # 3537430 # 3538542 # 1 # ID=1_3368;partial=00;start_type=ATG;rbs_motif=None;rbs_spacer=None;gc_cont=0.517	1_3368	3537430	3538542	+	Strict	250	261.2	vanG	38.87	3002909	protein homolog model	n/a	n/a	glycopeptide antibiotic	antibiotic target alteration	glycopeptide resistance gene cluster; Van ligase	ATGGAATGGGTTTTTAAGATGGCGAAATTGCGGGTAGGAATAGTATTTGGCGGTAAGTCGGCGGAACATGAAGTGTCTTTGCAATCAGCGAAAAATATCGTTGATGCGATCGATAAAACCCGCTTCGACGTGGTGCTGTTAGGGATAGATAAGGCGGGACAATGGCATGTTAACGATGCGGAAAATTATTTGCAGAATGCAGACGATCCGGCACATATCGCGCTACGTCCTTCGGCAATCAGTCTGGCCCAGGTGCCTGGCAAACATCAACACCAATTGATTAACGCCCAGAACGGGCAGCCGCTACCGACGGTAGATGTTATTTTTCCTATCGTCCACGGTACGCTGGGCGAAGACGGCTCATTGCAGGGGATGCTGCGCGTCGCAAACTTACCGTTT…	MEWVFKMAKLRVGIVFGGKSAEHEVSLQSAKNIVDAIDKTRFDVVLLGIDKAGQWHVNDAENYLQNADDPAHIALRPSAISLAQVPGKHQHQLINAQNGQPLPTVDVIFPIVHGTLGEDGSLQGMLRVANLPFVGSDVLSSAACMDKDIAKRLLRDAGLNIAPFITLTRTNRHAFSFAEVESRLGLPLFVKPANQGSSVGVSKVANEAQYQQAVALAFEFDHKVVVEQGIKGREIECAVLGNDNPQASTCGEIVLNSEFYAYDTKYIDDNGAQVVVPAQLPSGVNDKIRAIAIQAYQTLGCAGMARVDVFLTADNEVVINEINTLPGFTNISMYPKLWQASGLGYTDLISRLIELALERHTANNALKTTM	MQNKKIAVIFGGNSTEYEVSLQSASAVFENINTNKFDIIPIGITRSGEWYHYTGEKEKILNNTWFEDSKNLCPVVVSQNRSVKGFLEIASDKYRIIKVDLVFPVLHGKNGEDGTLQGIFELAGIPVVGCDTLSSALCMDKDRAHKLVSLAGISVPKSVTFKRFNEEAAMKEIEANLTYPLFIKPVRAGSSFGITKVIEKQELDAAIELAFEHDTEVIVEETINGFEVGCAVLGIDELIVGRVDEIELSSGFFDYTEKYTLKSSKIYMPARIDAEAEKRIQEAAVTIYKALGCSGFSRVDMFYTPSGEIVFNEVNTIPGFTSHSRYPNMMKGIGLSFSQMLDKLIGLYVE	106.02	gnl|BL_ORD_ID|1069|hsp_num:0	1157			0	1047	vancomycin
	1_3394 # 3570838 # 3571302 # -1 # ID=1_3394;partial=00;start_type=ATG;rbs_motif=AGGAG;rbs_spacer=7bp;gc_cont=0.544	1_3394	3570838	3571302	-	Perfect	290	310.1	golS	100	3000504	protein homolog model	n/a	n/a	monobactam; carbapenem; cephalosporin; cephamycin; penam; phenicol antibiotic; penem	antibiotic efflux	resistance-nodulation-cell division (RND) antibiotic efflux pump	ATGAACATCGGTAAAGCAGCTAAAGCATCGAAAGTCTCGGCCAAAATGATTCGCTACTATGAACAGATTGGTCTGATTCCCGCGGCAAGTCGGACGGATTCCGGCTATCGGGCCTATACCCAGGCTGATGTTAATCAATTGCATTTTATACGCCGCGCGCGCGACCTCGGTTTTTCAGTTGCTGAAATCAGCGACTTACTGAATCTTTGGAATAACCAGTCGCGGCAAAGCGCTGACGTCAAACGCCTGGCGCAGACGCACATTGATGAACTGGACAGACGTATCCAGAACATGCAGCACATGGCGCAAACCCTCAAAGCGCTGATTCACTGCTGCGCCGGCGACGCGCTGCCAGATTGTCCCATTCTGCATACGCTTGGACAACCTGACGATAGCGAG…	MNIGKAAKASKVSAKMIRYYEQIGLIPAASRTDSGYRAYTQADVNQLHFIRRARDLGFSVAEISDLLNLWNNQSRQSADVKRLAQTHIDELDRRIQNMQHMAQTLKALIHCCAGDALPDCPILHTLGQPDDSEPEARTGAVLRRPRRHGLAKRL	MNIGKAAKASKVSAKMIRYYEQIGLIPAASRTDSGYRAYTQADVNQLHFIRRARDLGFSVAEISDLLNLWNNQSRQSADVKRLAQTHIDELDRRIQNMQHMAQTLKALIHCCAGDALPDCPILHTLGQPDDSEPEARTGAVLRRPRRHGLAKRL	100	gnl|BL_ORD_ID|36|hsp_num:0	44			0	462	chloramphenicol
	1_3397 # 3575102 # 3578269 # 1 # ID=1_3397;partial=00;start_type=ATG;rbs_motif=AGG;rbs_spacer=10bp;gc_cont=0.567	1_3397	3575102	3578269	+	Strict	750	1209.9	adeF	60.67	3000777	protein homolog model	n/a	n/a	fluoroquinolone antibiotic; tetracycline antibiotic	antibiotic efflux	resistance-nodulation-cell division (RND) antibiotic efflux pump	ATGAAATTCACCCACTTTTTCATTGCACGACCCATCTTCGCCATCGTCCTGTCGCTGTTAATGCTGCTGGCTGGCGCTATCGCCTTTTTAAAACTGCCGCTGAGTGAATATCCGGCCGTTACGCCGCCCACGGTACAGGTTAGCGCCAGCTACCCCGGCGCTAACCCGCAAGTGATTGCCGATACGGTAGCCGCGCCGCTGGAACAGGTGATCAACGGCGTTGACGGCATGTTGTATATGAATACCCAGATGGCCATTGATGGTCGCATGGTTATCTCTATCGCCTTCGAACAGGGAACCGATCCTGATATGGCGCAAATTCAGGTGCAAAACCGGGTATCCCGCGCGCTGCCTCGCCTGCCCGAAGAAGTCCAGCGAATTGGCGTTGTAACGGAGAAA…	MKFTHFFIARPIFAIVLSLLMLLAGAIAFLKLPLSEYPAVTPPTVQVSASYPGANPQVIADTVAAPLEQVINGVDGMLYMNTQMAIDGRMVISIAFEQGTDPDMAQIQVQNRVSRALPRLPEEVQRIGVVTEKTSPDMLMVVHLVSPQKRYDSLYLSNFAIRQVRDELARLPGVGDVLVWGAGEYAMRVWLDPAKIANRGLTASDIVTALREQNVQVAAGSVGQQPEASAAFQMTVNTLGRLTSEEQFGEIVVKIGADGEVTRLRDVARVTLGADAYTLRSLLNGEAAPALQIIQSPGANAIDVSNAIRGKMDELQQNFPQDIEYRIAYDPTVFVRASLQSVAITLLEALVLVVLVVVLFLQTWRASIIPLVAVPVSLVGTFALMHLFGFSLNTLSLFG…	MNISKFFIDRPIFAGVLSVLILLAGLLSVFQLPISEYPEVVPPSVVVRAQYPGANPKVIAETVASPLEESINGVEDMLYMQSQANSDGNLTITVNFKLGIDPDKAQQLVQNRVSQAMPRLPEDVQRLGVTTLKSSPTLTMVVHLTSPDNRYDMTYLRNYAVLNVKDRLARLQGVGEVGLFGSGDYAMRVWLDPQKVAQRNLTATEIVNAIREQNIQVAAGTIGASPSNSPLQLSVNAQGRLTTEQEFADIILKTAPDGAVTRLGDVARVELAASQYGLRSLLDNKQAVAIPIFQAPGANALQVSDQVRSTMKELSKDFPSSIKYDIVYDPTQFVRASIKAVVHTLLEAITLVVVVVILFLQTWRASIIPLLAVPVSIIGTFALMLAFGYSINALSLFGM…	99.62	gnl|BL_ORD_ID|133|hsp_num:0	153			0	3126	tetracycline
	1_3612 # 3815966 # 3816910 # -1 # ID=1_3612;partial=00;start_type=ATG;rbs_motif=GGAG;rbs_spacer=6bp;gc_cont=0.476	1_3612	3815966	3816910	-	Strict	500	562	leuO	86.62	3003843	protein homolog model	n/a	n/a	nucleoside antibiotic; disinfecting agents and antiseptics	antibiotic efflux	major facilitator superfamily (MFS) antibiotic efflux pump	ATGCCAGAGGTCAAAACCGAAAAGCCGCATCTTTTAGATATGGGCAAACCACAGCTTCGCATGGTTGATTTGAACCTATTGACCGTGTTCGATGCGGTAATGCAAGAGCAGAATATTACGCGCGCCGCCCACACGCTGGGAATGTCGCAGCCTGCGGTCAGTAACGCCGTAGCGCGTCTGAAGGTTATGTTTAATGACGAACTTTTTGTTCGATATGGACGAGGAATTCAGCCGACTGCCCGTGCATTTCAGTTATTTGGTTCAGTCCGTCAGGCGTTACAATTGGTGCAAAATGAATTGCCGGGATCGGGGTTTGAGCCGACCAGCAGCGAACGTGTATTCAATCTTTGCGTGTGCAGTCCGCTGGATAATATCCTGACGTCACAGATTTATAATCGT…	MPEVKTEKPHLLDMGKPQLRMVDLNLLTVFDAVMQEQNITRAAHTLGMSQPAVSNAVARLKVMFNDELFVRYGRGIQPTARAFQLFGSVRQALQLVQNELPGSGFEPTSSERVFNLCVCSPLDNILTSQIYNRVEKIAPNIHVVFKASLNQNTEHQLRYQETEFVISYEEFRRPEFTSVPLFKDEMVLVASRKHPRISGPLLEGDVYNEQHAVVSLDRYASFSQPWYDTPDKQSSVAYQGMVLISVLNVVSQTHLVAIAPRWLAEEFAESLDLQILPLPLKLNSRTCYLSWHEAAGRDKGHQWMEDLLVSVCKR	MPEVQTDHPETAELSKPQLRMVDLNLLTVFDAVMQEQNITRAAHALGMSQPAVSNAVARLKVMFNDELFVRYGRGIQPTARAFQLFGSVRQALQLVQNELPGSGFEPASSERVFHLCVCSPLDSILTSQIYNHIEQIAPNIHVMFKSSLNQNTEHQLRYQETEFVISYEDFHRPEFTSVPLFKDEMVLVASKNHPTIKGPLLKHDVYNEQHAAVSLDRFASFSQTWYDTVDKQASIAYQGMAMMSVLSVVSQTHLVAIAPRWLAEEFAESLELQVLPLPLKQNSRTCYLSWHEAAGRDKGHQWMEEQLVSICKR	100	gnl|BL_ORD_ID|4919|hsp_num:0	5921			0	942	acriflavine; puromycin
	1_54 # 57532 # 58923 # 1 # ID=1_54;partial=00;start_type=ATG;rbs_motif=AGGAG;rbs_spacer=6bp;gc_cont=0.552	1_54	57532	58923	+	Strict	850	867.1	Escherichia coli UhpT with mutation conferring resistance to fosfomycin	95.68	3003890	protein variant model	E350Q	n/a	phosphonic acid antibiotic	antibiotic target alteration	antibiotic-resistant UhpT	ATGCTGGCCTTCTTAAACCAGGTGCGCAAGCCGACCCTGGATCTGCCGCTCGATGTGCGGCGTAAAATGTGGTTCAAGCCGTTCATGCAGTCCTATCTGGTGGTTTTTATCGGCTACCTGACCATGTACCTGATCCGCAAAAACTTTAACATCGCGCAGAACGACATGATTTCTACCTACGGGTTGAGCATGACCGAGCTGGGGATGATTGGCCTGGGCTTCTCGATCACCTACGGCGTGGGGAAAACGCTGGTTTCCTACTACGCTGACGGTAAAAATACCAAGCAGTTTCTACCGTTTATGTTGATCCTCTCCGCTATCTGTATGCTCGGCTTCAGCGCCAGCATGGGCGCGGGGTCAACCAGTCTGTTTCTGATGATCGCTTTCTATGCCCTGAGC…	MLAFLNQVRKPTLDLPLDVRRKMWFKPFMQSYLVVFIGYLTMYLIRKNFNIAQNDMISTYGLSMTELGMIGLGFSITYGVGKTLVSYYADGKNTKQFLPFMLILSAICMLGFSASMGAGSTSLFLMIAFYALSGFFQSTGGSCSYSTITKWTPRRKRGTFLGFWNISHNLGGAGAAGVALFGANYLFDGHVIGMFIFPSIIALIVGFIGLRFGSDSPESYGLGKAEELFGEEISEEDKETEENEMTKWQIFVEYVLKNKVIWLLCFSNIFLYVVRIGIDQWSTVYAFQELKLSKEVAIQGFTLFEVGALVGTLLWGWLSDLANGRRALVACVALALIIATLGVYQHASNQYVYLASLFALGFLVFGPQLLIGVAAVGFVPKKAIGAADGIKGTFAYLIG…	MLAFLNQVRKPTLDLPLEVRRKMWFKPFMQSYLVVFIGYLTMYLIRKNFNIAQNDMISTYGLSMTQLGMIGLGFSITYGVGKTLVSYYADGKNTKQFLPFMLILSAICMLGFSASMGSGSVSLFLMIAFYALSGFFQSTGGSCSYSTITKWTPRRKRGTFLGFWNISHNLGGAGAAGVALFGANYLFDGHVIGMFIFPSIIALIVGFIGLRYGSDSPESYGLGKAEELFGEEISEEDKETESTDMTKWQIFVEYVLKNKVIWLLCFANIFLYVVRIGIDQWSTVYAFQELKLSKAVAIQGFTLFEAGALVGTLLWGWLSDLANGRRGLVACIALALIIATLGVYQHASNEYIYLASLFALGFLVFGPQLLIGVAAVGFVPKKAIGAADGIKGTFAYLIG…	100	gnl|BL_ORD_ID|2126|hsp_num:0	2373			0	1389	fosfomycin
	1_390 # 438579 # 439763 # 1 # ID=1_390;partial=00;start_type=GTG;rbs_motif=AGGA;rbs_spacer=8bp;gc_cont=0.545	1_390	438579	439763	+	Strict	700	786.9	Escherichia coli EF-Tu mutants conferring resistance to Pulvomycin	99.49	3003369	protein variant model	R234F	n/a	elfamycin antibiotic	antibiotic target alteration	elfamycin resistant EF-Tu	GTGTCTAAAGAAAAATTTGAACGTACAAAACCGCACGTTAACGTCGGCACCATCGGCCACGTTGACCACGGTAAAACTACCCTGACCGCTGCAATCACCACCGTACTGGCTAAAACCTACGGCGGTGCTGCTCGTGCATTCGACCAGATCGATAACGCGCCGGAAGAAAAAGCGCGTGGTATCACCATCAACACTTCTCACGTTGAATACGATACCCCGACCCGCCACTACGCACACGTAGACTGCCCGGGGCACGCCGACTATGTTAAAAACATGATCACCGGTGCTGCTCAGATGGACGGCGCGATCCTGGTTGTTGCTGCGACTGACGGCCCGATGCCGCAGACCCGTGAGCACATCCTGCTGGGTCGTCAGGTAGGCGTTCCGTACATCATCGTG…	MSKEKFERTKPHVNVGTIGHVDHGKTTLTAAITTVLAKTYGGAARAFDQIDNAPEEKARGITINTSHVEYDTPTRHYAHVDCPGHADYVKNMITGAAQMDGAILVVAATDGPMPQTREHILLGRQVGVPYIIVFLNKCDMVDDEELLELVEMEVRELLSQYDFPGDDTPIVRGSALKALEGDAEWEAKIIELAGFLDSYIPEPERAIDKPFLLPIEDVFSISGRGTVVTGRVERGIIKVGEEVEIVGIKETQKSTCTGVEMFRKLLDEGRAGENVGVLLRGIKREEIERGQVLAKPGTIKPHTKFESEVYILSKDEGGRHTPFFKGYRPQFYFRTTDVTGTIELPEGVEMVMPGDNIKMVVTLIHPIAMDDGLRFAIREGGRTVGAGVVAKVLG	MLSPEGESTIVRNIAVSKEKFERTKPHVNVGTIGHVDHGKTTLTAAITTVLAKTYGGAARAFDQIDNAPEEKARGITINTSHVEYDTPTRHYAHVDCPGHADYVKNMITGAAQMDGAILVVAATDGPMPQTREHILLGRQVGVPYIIVFLNKCDMVDDEELLELVEMEVRELLSQYDFPGDDTPIVRGSALKALEGDAEWEAKILELAGFLDSYIPEPERAIDKPFLLPIEDVFSISGRGTVVTGRVERGIIKVGEEVEIVGIKETQKSTCTGVEMFRKLLDEGRAGENVGVLLRGIKREEIERGQVLAKPGTIKPHTKFESEVYILSKDEGGRHTPFFKGYRPQFYFRTTDVTGTIELPEGVEMVMPGDNIKMVVTLIHPIAMDDGLRFAIREGGRTV…	96.33	gnl|BL_ORD_ID|1969|hsp_num:0	2158			45	1227	pulvomycin
	1_1453 # 1567453 # 1568811 # 1 # ID=1_1453;partial=00;start_type=ATG;rbs_motif=GGAG;rbs_spacer=8bp;gc_cont=0.548	1_1453	1567453	1568811	+	Strict	850	898.7	Escherichia coli GlpT with mutation conferring resistance to fosfomycin	96.9	3003889	protein variant model	E448K	n/a	phosphonic acid antibiotic	antibiotic target alteration	antibiotic-resistant GlpT	ATGTTGAGTATTTTTAAACCAGCGCCGCATAAAGCGCGCTTGCCAGCGGCGGAGATTGATCCGACCTATCGCCGATTACGCTGGCAGATTTTCCTGGGGATATTCTTTGGCTATGCCGCGTATTATCTGGTGCGCAAGAACTTTGCCCTCGCGATGCCCTACCTGGTAGAACAGGGTTTTTCACGCGGCGATCTGGGCTTTGCGTTGTCCGGGATTTCCATCGCTTATGGTTTTTCGAAATTTATAATGGGTTCGGTGTCCGATCGCTCGAATCCGCGCGTTTTTCTGCCGGCAGGGTTGATTCTGGCCGCAGCAGTCATGTTGTTTATGGGCTTTGTGCCGTGGGCGACATCCAGCATCGCCGTGATGTTTGTGCTGTTGTTCCTTTGCGGCTGGTTC…	MLSIFKPAPHKARLPAAEIDPTYRRLRWQIFLGIFFGYAAYYLVRKNFALAMPYLVEQGFSRGDLGFALSGISIAYGFSKFIMGSVSDRSNPRVFLPAGLILAAAVMLFMGFVPWATSSIAVMFVLLFLCGWFQGMGWPPCGRTMVHWWSQKERGGIVSVWNCAHNVGGGIPPLLFLLGMAWFNDWKAALYMPAFGAIVVALFAFAMMRDTPQSCGLPPIEEYKNDYPDDYNEKAEEELTAKQIFMQYVLPNKLLWYIAIANVFVYLLRYGILDWSPTYLKEVKHFALDKSSWAYFLYEYAGIPGTLLCGWMSDKVFRGNRGATGVFFMTLVTIATIVYWMNPAGNPNVDMACMIIIGFLIYGPVMLIGLHALELAPKKAAGTAAGFTGLFGYLGGSVA…	MLSIFKPAPHKARLPAAEIDPTYRRLRWQIFLGIFFGYAAYYLVRKNFALAMPYLVEQGFSRGDLGFALSGISIAYGFSKFIMGSVSDRSNPRVFLPAGLILAAAVMLFMGFVPWATSSIAVMFVLLFLCGWFQGMGWPPCGRTMVHWWSQKERGGIVSVWNCAHNVGGGIPPLLFLLGMAWFNDWHAALYMPAFCAILVALFAFAMMRDTPQSCGLPPIEEYKNDYPDDYNEKAEQELTAKQIFMQYVLPNKLLWYIAIANVFVYLLRYGILDWSPTYLKEVKHFALDKSSWAYFLYEYAGIPGTLLCGWMSDKVFRGNRGATGVFFMTLVTIATIVYWMNPAGNPTVDMICMIVIGFLIYGPVMLIGLHALELAPKKAAGTAAGFTGLFGYLGGSVA…	100	gnl|BL_ORD_ID|2127|hsp_num:0	2372			0	1356	fosfomycin
	1_1464 # 1581069 # 1583705 # 1 # ID=1_1464;partial=00;start_type=ATG;rbs_motif=GGA;rbs_spacer=10bp;gc_cont=0.559	1_1464	1581069	1583705	+	Strict	1500	1679.5	Salmonella enterica gyrA conferring resistance to fluoroquinolones	99.89	3003926	protein variant model	D87Y	D87Y:1545	fluoroquinolone antibiotic	antibiotic target alteration	fluoroquinolone resistant gyrA	ATGAGCGACCTTGCGAGAGAAATTACACCGGTCAACATTGAGGAAGAGCTGAAAAGCTCCTATCTGGATTATGCGATGTCGGTCATTGTTGGCCGTGCGCTGCCGGATGTCCGAGATGGCCTGAAGCCGGTACACCGTCGCGTACTTTACGCCATGAACGTATTGGGCAATGACTGGAACAAAGCCTATAAAAAATCTGCCCGTGTCGTTGGTGACGTAATCGGTAAATACCATCCCCACGGCGATTCCGCAGTGTATTACACCATCGTTCGTATGGCGCAGCCATTCTCGCTGCGTTACATGCTGGTGGATGGTCAGGGTAACTTCGGTTCTATTGACGGCGACTCCGCGGCGGCAATGCGTTATACGGAGATCCGTCTGGCGAAAATCGCCCACGAA…	MSDLAREITPVNIEEELKSSYLDYAMSVIVGRALPDVRDGLKPVHRRVLYAMNVLGNDWNKAYKKSARVVGDVIGKYHPHGDSAVYYTIVRMAQPFSLRYMLVDGQGNFGSIDGDSAAAMRYTEIRLAKIAHELMADLEKETVDFVDNYDGTEKIPDVMPTKIPNLLVNGSSGIAVGMATNIPPHNLTEVINGCLAYIDNEDISIEGLMEHIPGPDFPTAAIINGRRGIEEAYRTGRGKVYIRARAEVEADAKTGRETIIVHEIPYQVNKARLIEKIAELVKDKRVEGISALRDESDKDGMRIVIEVKRDAVGEVVLNNLYSQTQLQVSFGINMVALHHGQPKIMNLKDIISAFVRHRREVVTRRTIFELRKARDRAHILEALAIALANIDPIIELIRR…	MSDLAREITPVNIEEELKSSYLDYAMSVIVGRALPDVRDGLKPVHRRVLYAMNVLGNDWNKAYKKSARVVGDVIGKYHPHGDSAVYDTIVRMAQPFSLRYMLVDGQGNFGSIDGDSAAAMRYTEIRLAKIAHELMADLEKETVDFVDNYDGTEKIPDVMPTKIPNLLVNGSSGIAVGMATNIPPHNLTEVINGCLAYIDNEDISIEGLMEHIPGPDFPTAAIINGRRGIEEAYRTGRGKVYIRARAEVEADAKTGRETIIVHEIPYQVNKARLIEKIAELVKDKRVEGISALRDESDKDGMRIVIEVKRDAVGEVVLNNLYSQTQLQVSFGINMVALHHGQPKIMNLKDIISAFVRHRREVVTRRTIFELRKARDRAHILEALAIALANIDPIIELIRR…	100	gnl|BL_ORD_ID|2156|hsp_num:0	2403			0	2634	ciprofloxacin; nalidixic acid
	1_3605 # 3807987 # 3809753 # -1 # ID=1_3605;partial=00;start_type=ATG;rbs_motif=AGGA;rbs_spacer=12bp;gc_cont=0.547	1_3605	3807987	3809753	-	Strict	500	564.7	Haemophilus influenzae PBP3 conferring resistance to beta-lactam antibiotics	51.85	3004446	protein variant model	D350N, S357N	n/a	cephalosporin; cephamycin; penam	antibiotic target alteration	Penicillin-binding protein mutations conferring resistance to beta-lactam antibiotics	ATGAAAGCAGCGGCAAAAACGCAAAAATCGAAACGCCAGGAAGAACAGACCAACTTCATCAGTTGGCGTTTTGCGTTGCTGTGCGGCTGTATTTTACTGGCGCTGGTTTTTTTACTTGGACGCGCGGCGTGGCTACAGATTATCGCCCCGGATATGCTGGTGCGTCAGGGCGATATGCGTTCGCTGCGTGTTCAGGAAGTCTCCACCTCACGCGGTATGATTACCGACCGTTCCGGGCGTCCACTGGCGGTCAGCGTACCGGTTAAGGCGATCTGGGCCGACCCGAAAGAAGTTCATGACGCCGGCGGCATCAGCGTTGGCGATCGCTGGAAAGCGCTTTCTACTGCGCTCAATATTCCGCTCGATCAGCTCTCCGCCCGTATCAACGCCAACCCGAAA…	MKAAAKTQKSKRQEEQTNFISWRFALLCGCILLALVFLLGRAAWLQIIAPDMLVRQGDMRSLRVQEVSTSRGMITDRSGRPLAVSVPVKAIWADPKEVHDAGGISVGDRWKALSTALNIPLDQLSARINANPKGRFIYLARQVNPDMADYIKKLKLPGIHLREESRRYYPSGEVTAHLIGFTNVDSQGIEGVEKSFDKWLTGQPGERIVRKDRYGRVIEDISSTDSQAAHNLALSIDERLQALVYRELNNAVAFNKAESGSAVLVDVNTGEVLAMANSPSYNPNNLAGTPKDAMRNRTITDVFEPGSTVKPMVVMTALQRGIVNENTVLNTVPYRINGHEIKDVARYSELTLTGVLQKSSNVGVSKLALAMPSSALVDTYSRFGLGKATNLGLVGERSG…	MVKFNSSRKSGKSKKTIRKLTAPETVKQNKPQKVFEKCFMRGRYMLSTVLILLGLCALVARAAYVQSINADTLSNEADKRSLRKDEVLSVRGSILDRNGQLLSVSVPMSAIVADPKTMLKENSLADKERIAALAEELGMTENDLVKKIEKNSKSGYLYLARQVELSKANYIRRLKIKGIILETEHRRFYPRVEEAAHVVGYTDIDGNGIEGIEKSFNSLLVGKDGSRTVRKDKRGNIVAHISDEKKYDAQDVTLSIDEKLQSMVYREIKKAVSENNAESGTAVLVDVRTGEVLAMATAPSYNPNNRVGVKSELMRNRAITDTFEPGSTVKPFVVLTALQRGVVKRDEIIDTTSFKLSGKEIVDVAPRAQQTLDEILMNSSNRGVSRLALRMPPSALMET…	96.39	gnl|BL_ORD_ID|2491|hsp_num:0	2886			63	1758	ceftriaxone; ampicillin; cefaclor; cefotaxime; cefditoren; cefdinir
	1_4135 # 4403316 # 4404500 # -1 # ID=1_4135;partial=00;start_type=ATG;rbs_motif=GAGG;rbs_spacer=8bp;gc_cont=0.543	1_4135	4403316	4404500	-	Strict	700	786.9	Escherichia coli EF-Tu mutants conferring resistance to Pulvomycin	99.49	3003369	protein variant model	R234F	n/a	elfamycin antibiotic	antibiotic target alteration	elfamycin resistant EF-Tu	ATGTCTAAAGAAAAGTTTGAACGTACAAAACCGCACGTTAACGTCGGTACTATCGGCCACGTTGACCATGGTAAAACAACGCTGACCGCTGCCATTACTACCGTACTGGCTAAAACCTACGGCGGTGCCGCCCGCGCATTCGACCAGATCGATAACGCGCCGGAAGAAAAAGCGCGTGGTATCACCATCAACACTTCTCACGTTGAATACGATACCCCGACCCGCCACTACGCACACGTAGACTGCCCGGGGCACGCCGACTATGTTAAAAACATGATCACCGGTGCTGCTCAGATGGACGGCGCGATCCTGGTTGTTGCTGCGACTGACGGCCCGATGCCGCAGACCCGTGAGCACATCCTGCTGGGTCGTCAGGTAGGCGTTCCGTACATCATCGTG…	MSKEKFERTKPHVNVGTIGHVDHGKTTLTAAITTVLAKTYGGAARAFDQIDNAPEEKARGITINTSHVEYDTPTRHYAHVDCPGHADYVKNMITGAAQMDGAILVVAATDGPMPQTREHILLGRQVGVPYIIVFLNKCDMVDDEELLELVEMEVRELLSQYDFPGDDTPIVRGSALKALEGDAEWEAKIIELAGFLDSYIPEPERAIDKPFLLPIEDVFSISGRGTVVTGRVERGIIKVGEEVEIVGIKETQKSTCTGVEMFRKLLDEGRAGENVGVLLRGIKREEIERGQVLAKPGTIKPHTKFESEVYILSKDEGGRHTPFFKGYRPQFYFRTTDVTGTIELPEGVEMVMPGDNIKMVVTLIHPIAMDDGLRFAIREGGRTVGAGVVAKVLG	MLSPEGESTIVRNIAVSKEKFERTKPHVNVGTIGHVDHGKTTLTAAITTVLAKTYGGAARAFDQIDNAPEEKARGITINTSHVEYDTPTRHYAHVDCPGHADYVKNMITGAAQMDGAILVVAATDGPMPQTREHILLGRQVGVPYIIVFLNKCDMVDDEELLELVEMEVRELLSQYDFPGDDTPIVRGSALKALEGDAEWEAKILELAGFLDSYIPEPERAIDKPFLLPIEDVFSISGRGTVVTGRVERGIIKVGEEVEIVGIKETQKSTCTGVEMFRKLLDEGRAGENVGVLLRGIKREEIERGQVLAKPGTIKPHTKFESEVYILSKDEGGRHTPFFKGYRPQFYFRTTDVTGTIELPEGVEMVMPGDNIKMVVTLIHPIAMDDGLRFAIREGGRTV…	96.33	gnl|BL_ORD_ID|1969|hsp_num:0	2158			45	1227	pulvomycin
	1_1591 # 1721616 # 1722338 # -1 # ID=1_1591;partial=00;start_type=ATG;rbs_motif=GAG;rbs_spacer=6bp;gc_cont=0.537	1_1591	1721616	1722338	-	Strict	450	456.8	baeR	94.14	3000828	protein overexpression model	n/a	n/a	aminoglycoside antibiotic; aminocoumarin antibiotic	antibiotic efflux	resistance-nodulation-cell division (RND) antibiotic efflux pump	ATGACTGAATTACCCATTGATGAAAACACGCCGCGCATTTTGATTGTTGAAGATGAACCCAAGCTGGGTCAGCTGCTTATTGACTACTTACGCGCGGCGAGTTACGCCCCCACGCTCATCAATCACGGCGACAAGGTACTGCCGTATGTGCGTCAAACGCCGCCGGATCTGATTCTGCTGGATCTGATGCTGCCGGGTACCGATGGTCTGACGCTATGCCGGGAGATTCGCCGTTTTTCCGACATCCCCATTGTGATGGTCACAGCCAAAATTGAAGAGATCGACCGGCTGCTGGGGCTGGAAATCGGCGCCGATGATTATATCTGTAAGCCTTACAGCCCGCGCGAAGTCGTGGCCCGCGTGAAAACCATTTTGCGCCGCTGTAAACCGCAGCGCGAA…	MTELPIDENTPRILIVEDEPKLGQLLIDYLRAASYAPTLINHGDKVLPYVRQTPPDLILLDLMLPGTDGLTLCREIRRFSDIPIVMVTAKIEEIDRLLGLEIGADDYICKPYSPREVVARVKTILRRCKPQRELQQQDAESPLMIDESRFQASWCGKALDLTPAEFRLLKTLSLEPGKVFSREQLLNHLYDDYRVVTDRTIDSHIKNLRRKLESLDAEQSFIRAVYGVGYRWEADACRLV	MTELPIDENTPRILIVEDEPKLGQLLIDYLRAASYAPSLISHGDQVLPYVRQTPPDLILLDLMLPGTDGLTLCREIRRFSDVPIVMVTAKIEEIDRLLGLEIGADDYICKPYSPREVVARVKTILRRCKPQRELQVLDAESPLIVDESRFQASWRSKLLDLTPAEFRLLKTLSHEPGKVFSREQLLNHLYDDYRVVTDRTIDSHIKNLRRKLEALDAEQSFIRAVYGVGYRWEADACRIA	100	gnl|BL_ORD_ID|1382|hsp_num:0	1337			0	717	neomycin; amikacin; kanamycin A; tobramycin; novobiocin; gentamicin
	1_2192 # 2319687 # 2320121 # -1 # ID=1_2192;partial=00;start_type=TTG;rbs_motif=None;rbs_spacer=None;gc_cont=0.474	1_2192	2319687	2320121	-	Strict	210	273.5	Escherichia coli AcrAB-TolC with MarR mutations conferring resistance to ciprofloxacin and tetracycline	92.36	3003378	protein overexpression model	n/a	n/a	fluoroquinolone antibiotic; cephalosporin; glycylcycline; penam; tetracycline antibiotic; rifamycin antibiotic; phenicol antibiotic; disinfecting agents and antiseptics	antibiotic target alteration; antibiotic efflux	resistance-nodulation-cell division (RND) antibiotic efflux pump	TTGAAAAGCACCAGTGATCTGTTCAATGAAATCATTCCGCTGGGTCGCTTGATCTACATGGTAAATCAAAAAAAAGATCGCCTGTTAAATAACTATTTATCCCCGCTGGATATCACCGCAACACAGTTTAAAGTGCTTTGCTCGATACGCTGCGCGGGATGTATTACCCCGGTTGAACTTAAAAAAGTGCTGTCTGTCGATCTCGGCGCATTGACGCGAATGCTCGACCGCCTGCTGTGCAAAGGCTGGATCGAAAGACTGCCGAATCCTAATGACAAACGCGGCGTACTGGTGAAGCTAACGCCGGACGGCGCGGCAATTTGTGAGCAATGTCATCAACGACCAGGGCAAGACCTGCATCAGGAATTAACAAAAAACTTAACGGCGGACGAAGTGGCA…	LKSTSDLFNEIIPLGRLIYMVNQKKDRLLNNYLSPLDITATQFKVLCSIRCAGCITPVELKKVLSVDLGALTRMLDRLLCKGWIERLPNPNDKRGVLVKLTPDGAAICEQCHQRPGQDLHQELTKNLTADEVATLEYLLKKILP	MKSTSDLFNEIIPLGRLIHMVNQKKDRLLNEYLSPLDITAAQFKVLCSIRCAACITPVELKKVLSVDLGALTRMLDRLVCKGWVERLPNPNDKRGVLVKLTTGGAAICEQCHQLVGQDLHQELTKNLTADEVATLEYLLKKVLP	100	gnl|BL_ORD_ID|1983|hsp_num:0	431			0	432	tigecycline; ciprofloxacin; tetracycline; rifampin; chloramphenicol; ampicillin; cefalotin; triclosan
	1_4039 # 4274954 # 4275412 # -1 # ID=1_4039;partial=00;start_type=ATG;rbs_motif=AGG;rbs_spacer=11bp;gc_cont=0.549	1_4039	4274954	4275412	-	Strict	300	300.4	Escherichia coli soxR with mutation conferring antibiotic resistance	96.05	3003381	protein overexpression model	n/a	n/a	fluoroquinolone antibiotic; cephalosporin; glycylcycline; penam; tetracycline antibiotic; rifamycin antibiotic; phenicol antibiotic; disinfecting agents and antiseptics	antibiotic target alteration; antibiotic efflux	ATP-binding cassette (ABC) antibiotic efflux pump; major facilitator superfamily (MFS) antibiotic efflux pump; resistance-nodulation-cell division (RND) antibiotic efflux pump	ATGGAAAAAAAATCTCCCCGTTTAAAAGCCTTACTGACGCCGGGGGAAGTTGCGAAACGTAGCGGTGTTGCTGTGTCCGCCCTGCACTTCTATGAAAGCAAAGGGCTAATTACCAGTATCCGTAATAGCGGTAACCAACGGCGATACAAGCGTGACGTGTTGCGTTATGTCGCGATTATCAAGATCGCCCAGCGTATCGGCATCCCGCTGGCAACTATCGGCGACGCGTTTGGTATCTTGCCGGAAGGACATACGTTAAGCGCGAAAGAGTGGAAGCAGCTCTCCTCGCAGTGGCGCGAAGAGTTAGACCGACGTATTCATACGCTGGTGGCGTTGCGCGATGAGCTGGACGGTTGTATCGGCTGCGGCTGTTTATCGCGTAGCGACTGTCCGCTGCGA…	MEKKSPRLKALLTPGEVAKRSGVAVSALHFYESKGLITSIRNSGNQRRYKRDVLRYVAIIKIAQRIGIPLATIGDAFGILPEGHTLSAKEWKQLSSQWREELDRRIHTLVALRDELDGCIGCGCLSRSDCPLRNPGDRLGEHGTGARLLEDD	MEKKLPRIKALLTPGEVAKRSGVAVSALHFYESKGLITSIRNSGNQRRYKRDVLRYVAIIKIAQRIGIPLATIGEAFGVLPEGHTLSAKEWKQLSSQWREELDRRIHTLVALRDELDGCIGCGCLSRSDCPLRNPGDRLGEEGTGARLLEDEQN	98.7	gnl|BL_ORD_ID|1972|hsp_num:0	1005			0	456	tigecycline; ciprofloxacin; tetracycline; rifampin; chloramphenicol; ampicillin; nalidixic acid; norfloxacin; cefalotin; triclosan
	1_4040 # 4275499 # 4275822 # 1 # ID=1_4040;partial=00;start_type=ATG;rbs_motif=GAGG;rbs_spacer=7bp;gc_cont=0.515	1_4040	4275499	4275822	+	Strict	200	209.1	Escherichia coli soxS with mutation conferring antibiotic resistance	95.33	3003511	protein overexpression model	n/a	n/a	fluoroquinolone antibiotic; monobactam; carbapenem; cephalosporin; glycylcycline; cephamycin; penam; tetracycline antibiotic; rifamycin antibiotic; phenicol antibiotic; penem; disinfecting agents and antiseptics	antibiotic target alteration; antibiotic efflux; reduced permeability to antibiotic	ATP-binding cassette (ABC) antibiotic efflux pump; major facilitator superfamily (MFS) antibiotic efflux pump; resistance-nodulation-cell division (RND) antibiotic efflux pump; General Bacterial Porin with reduced permeability to beta-lactams	ATGTCGCATCAGCAGATAATTCAGACCCTTATCGAATGGATTGATGAACATATCGACCAACCGCTAAACATTGATGTGGTGGCAAAAAAATCGGGCTACTCCAAGTGGTATTTGCAGCGGATGTTTCGTACGGTAACGCATCAAACATTAGGCGAGTATATTCGCCAGCGCCGTCTCCTGTTGGCGGCCGTTGAGCTACGAACGACCGAGCGCCCGATTTTTGATATCGCGATGGACCTGGGCTATGTATCGCAGCAAACCTTCTCGCGTGTATTCCGCCGCGAGTTCGATCGCACTCCCAGCGATTACCGTCACCGCCTGTAG	MSHQQIIQTLIEWIDEHIDQPLNIDVVAKKSGYSKWYLQRMFRTVTHQTLGEYIRQRRLLLAAVELRTTERPIFDIAMDLGYVSQQTFSRVFRREFDRTPSDYRHRL	MSHQKIIQDLIAWIDEHIDQPLNIDVVAKKSGYSKWYLQRMFRTVTHQTLGDYIRQRRLLLAAVELRTTERPIFDIAMDLGYVSQQTFSRVFRRQFDRTPSDYRHRL	100	gnl|BL_ORD_ID|1974|hsp_num:0	2066			0	321	tigecycline; ciprofloxacin; tetracycline; rifampin; chloramphenicol; ampicillin; norfloxacin; cefalotin; triclosan; enrofloxacin
SA608	1_369 # 421789 # 422421 # -1 # ID=1_369;partial=00;start_type=ATG;rbs_motif=AGGA;rbs_spacer=9bp;gc_cont=0.506	1_369	421789	422421	-	Strict	400	418.3	CRP	99.05	3000518	protein homolog model	n/a	n/a	macrolide antibiotic; fluoroquinolone antibiotic; penam	antibiotic efflux	resistance-nodulation-cell division (RND) antibiotic efflux pump	ATGGTGCTTGGCAAACCGCAAACAGACCCGACTCTTGAATGGTTCTTGTCTCATTGCCACATTCATAAGTACCCGTCAAAGAGCACGCTGATTCACCAGGGTGAAAAAGCAGAAACGCTGTACTACATCGTTAAAGGCTCCGTGGCAGTGCTGATCAAAGATGAAGAAGGGAAAGAAATGATCCTTTCTTATCTGAATCAGGGTGATTTTATTGGTGAACTGGGCCTGTTTGAAGAAGGCCAGGAACGCAGCGCCTGGGTACGTGCGAAAACCGCATGTGAGGTCGCTGAAATTTCCTACAAAAAATTTCGCCAATTAATCCAGGTCAACCCGGATATTCTGATGCGCCTCTCTTCCCAGATGGCTCGTCGCTTACAAGTCACCTCTGAAAAAGTAGGT…	MVLGKPQTDPTLEWFLSHCHIHKYPSKSTLIHQGEKAETLYYIVKGSVAVLIKDEEGKEMILSYLNQGDFIGELGLFEEGQERSAWVRAKTACEVAEISYKKFRQLIQVNPDILMRLSSQMARRLQVTSEKVGNLAFLDVTGRIAQTLLNLAKQPDAMTHPDGMQIKITRQEIGQIVGCSRETVGRILKMLEDQNLISAHGKTIVVYGTR	MVLGKPQTDPTLEWFLSHCHIHKYPSKSKLIHQGEKAETLYYIVKGSVAVLIKDEEGKEMILSYLNQGDFIGELGLFEEGQERSAWVRAKTACEVAEISYKKFRQLIQVNPDILMRLSAQMARRLQVTSEKVGNLAFLDVTGRIAQTLLNLAKQPDAMTHPDGMQIKITRQEIGQIVGCSRETVGRILKMLEDQNLISAHGKTIVVYGTR	100	gnl|BL_ORD_ID|803|hsp_num:0	869			0	630	erythromycin; cloxacillin; oxacillin; norfloxacin
	1_662 # 692198 # 693019 # 1 # ID=1_662;partial=00;start_type=ATG;rbs_motif=AGG;rbs_spacer=9bp;gc_cont=0.536	1_662	692198	693019	+	Strict	500	511.5	bacA	97.07	3002986	protein homolog model	n/a	n/a	peptide antibiotic	antibiotic target alteration	undecaprenyl pyrophosphate related proteins	ATGAGCGATATGCACTCGCTGCTGATAGCGGCAATTTTGGGTGTGGTCGAAGGATTGACGGAGTTTTTGCCGGTATCCAGCACGGGCCATATGATTATTGTGGGTCATCTGCTGGGGTTTGAAGGCGATACGGCCAAGACATTCGAAGTGGTGATTCAACTTGGATCTATTCTGGCGGTCGTGGTGATGTTCTGGCGGCGGTTGTTTGGCCTCATCGGTATTCACTTTGGCCGCCCGCTACAGCGTGAAGGTGAAAGTAAAGGTCGATTAACGTTGATTCACATCCTGCTGGGCATGATTCCGGCGGTGGTGCTGGGGTTAGTCTTTCATGACACGATCAAGTCGCTATTTAACCCAATTAACGTGATGTACGCGCTGGTGGTAGGCGGTCTGTTGCTG…	MSDMHSLLIAAILGVVEGLTEFLPVSSTGHMIIVGHLLGFEGDTAKTFEVVIQLGSILAVVVMFWRRLFGLIGIHFGRPLQREGESKGRLTLIHILLGMIPAVVLGLVFHDTIKSLFNPINVMYALVVGGLLLIAAECLKPKEPRAPGLDDMTYRQAFMIGCFQCLALWPGFSRSGATISGGMLMGVSRYAASEFSFLLAVPMMMGATVLDLYKSWSFLTAADIPMFAVGFVTAFVVALIAIKTFLQLIKRISFIPFAIYRFVVAAAVYVVFF	MSDMHSLLIAAILGVVEGLTEFLPVSSTGHMIIVGHLLGFEGDTAKTFEVVIQLGSILAVVVMFWRRLFGLIGIHFGRPLQHEGESKGRLTLIHILLGMIPAVVLGLLFHDTIKSLFNPINVMYALVVGGLLLIAAECLKPKEPRAPGLDDMTYRQAFMIGCFQCLALWPGFSRSGATISGGMLMGVSRYAASEFSFLLAVPMMMGATALDLYKSWGFLTSGDIPMFAVGFITAFVVALIAIKTFLQLIKRISFIPFAIYRFIVAAAVYVVFF	100	gnl|BL_ORD_ID|1680|hsp_num:0	1820			0	819	bacitracin; bacitracin A; bacitracin B; bacitracin F
	1_1046 # 1095751 # 1095936 # 1 # ID=1_1046;partial=00;start_type=ATG;rbs_motif=AGGAG;rbs_spacer=6bp;gc_cont=0.511	1_1046	1095751	1095936	+	Strict	100	102.4	rsmA	85.25	3005069	protein homolog model	n/a	n/a	fluoroquinolone antibiotic; diaminopyrimidine antibiotic; phenicol antibiotic	antibiotic efflux	resistance-nodulation-cell division (RND) antibiotic efflux pump	ATGCTGATTCTGACTCGTCGAGTTGGTGAGACCCTCATGATTGGCGATGAGGTCACCGTGACAGTTTTAGGGGTGAAGGGCAACCAGGTGCGTATTGGCGTGAACGCCCCGAAAGAAGTTTCTGTCCATCGTGAAGAGATCTACCAGCGTATCCAGGCTGAAAAATCCCAGCAGTCCAGTTACTAA	MLILTRRVGETLMIGDEVTVTVLGVKGNQVRIGVNAPKEVSVHREEIYQRIQAEKSQQSSY	MLILTRRVGETLMVGDDVTVTVLGVKGNQVRIGVNAPKEVAVHREEIYQRIQKEKDQEPNH	100	gnl|BL_ORD_ID|2788|hsp_num:0	3807			0	183	trimethoprim; chloramphenicol
	1_1052 # 1102247 # 1103785 # -1 # ID=1_1052;partial=00;start_type=ATG;rbs_motif=GAGG;rbs_spacer=8bp;gc_cont=0.571	1_1052	1102247	1103785	-	Strict	900	966.5	emrB	95.9	3000074	protein homolog model	n/a	n/a	fluoroquinolone antibiotic	antibiotic efflux	major facilitator superfamily (MFS) antibiotic efflux pump	ATGCAACAGCAAAAACCGCTGGAGGGCGCGCAGCTCGTCATCATGACGATCGCGCTGTCGCTGGCGACATTCATGCAGGTGCTGGACTCCACCATTGCCAACGTGGCGATTCCGACCATCGCCGGGAACCTGGGTTCTTCCCTAAGCCAGGGGACATGGGTTATCACCTCTTTCGGGGTGGCGAACGCTATCTCGATTCCCTTAACCGGCTGGCTGGCGAAACGTTTTGGCGAAGTCAAACTGTTCATGTGGTCGACGGTCGCCTTTGCCGCGGCCTCCTGGGCCTGTGGCGTATCCAGCAGCCTGAATATGCTTATCTTCTTCCGCGTGGTGCAGGGCGTGGTCGCCGGGCCGCTGATTCCGCTCTCGCAAAGCCTGTTGCTGAATAACTATCCGCCT…	MQQQKPLEGAQLVIMTIALSLATFMQVLDSTIANVAIPTIAGNLGSSLSQGTWVITSFGVANAISIPLTGWLAKRFGEVKLFMWSTVAFAAASWACGVSSSLNMLIFFRVVQGVVAGPLIPLSQSLLLNNYPPAKRSIALALWSMTVIVAPICGPILGGYISDNYHWGWIFFINVPIGIAVVLMTLHTLRGRETHTERRRIDAVGLALLVIGIGSLQIMLDRGKELDWFSSQEIIILTVVAVIAISFLIVWELTDDHPIVDLSLFKSRNFTIGCLCISLAYMLYFGAIVLLPQLLQEVYGYTATWAGLASAPVGIIPVILSPIIGRFAHKLDMRRLVTFSFIMYAVCFYWRAWTFEPGMDFGASAWPQFIQGFAVACFFMPLTTITLSGLPPERLAAAS…	MQQQKPLEGAQLVIMTIALSLATFMQVLDSTIANVAIPTIAGNLGSSLSQGTWVITSFGVANAISIPLTGWLAKRVGEVKLFLWSTIAFAIASWACGVSSSLNMLIFFRVIQGIVAGPLIPLSQSLLLNNYPPAKRSIALALWSMTVIVAPICGPILGGYISDNYHWGWIFFINVPIGVAVVLMTLQTLRGRETRTERRRIDAVGLALLVIGIGSLQIMLDRGKELDWFSSQEIIILTVVAVVAICFLIVWELTDDNPIVDLSLFKSRNFTIGCLCISLAYMLYFGAIVLLPQLLQEVYGYTATWAGLASAPVGIIPVILSPIIGRFAHKLDMRRLVTFSFIMYAVCFYWRAYTFEPGMDFGASAWPQFIQGFAVACFFMPLTTITLSGLPPERLAAAS…	100	gnl|BL_ORD_ID|1705|hsp_num:0	1847			0	1536	nalidixic acid
	1_1054 # 1105101 # 1105631 # -1 # ID=1_1054;partial=00;start_type=ATG;rbs_motif=GAGG;rbs_spacer=10bp;gc_cont=0.482	1_1054	1105101	1105631	-	Strict	280	327	emrR	93.14	3000516	protein homolog model	n/a	n/a	fluoroquinolone antibiotic	antibiotic efflux	major facilitator superfamily (MFS) antibiotic efflux pump	ATGGATAGTTCGTTTACGCCCATTGAACAAATGCTAAAATTTCGCGCCAGCCGTCACGAAGACTTTCCTTATCAGGAAATTCTTTTGACTCGTCTTTGTATGCACATGCAAGGCAAGCTCCTGGAAAACCGCAATAAAATGCTGAAGGCTCAAGGGATTAACGAGACGTTGTTTATGGCGTTGATTACGCTGGAGTCTCAGGAAAACCACAGTATTCAGCCGTCTGAATTAAGCTGCGCGCTGGGTTCATCTCGCACCAATGCGACACGCATTGCAGATGAGCTGGAAAAACGCGGCTGGATTGAGCGTCGTGAGAGCGATAACGACCGCCGTTGCCTGCATCTGCAATTAACGGAGAAAGGCCAGGCATTTTTGCAAGAAGTGCTTCCGCCTCAGCAT…	MDSSFTPIEQMLKFRASRHEDFPYQEILLTRLCMHMQGKLLENRNKMLKAQGINETLFMALITLESQENHSIQPSELSCALGSSRTNATRIADELEKRGWIERRESDNDRRCLHLQLTEKGQAFLQEVLPPQHHCLHQLWSSLSTAEKDQLEHITRKLLTRLDQMEQEGTVLEALR	MDSSFTPIEQMLKFRASRHEDFPYQEILLTRLCMHMQSKLLENRNKMLKAQGINETLFMALITLESQENHSIQPSELSCALGSSRTNATRIADELEKRGWIERRESDNDRRCLHLQLTEKGHEFLREVLPPQHNCLHQLWSALSTTEKDQLEQITRKLLSRLDQMEQDGVVLEAMS	100	gnl|BL_ORD_ID|1225|hsp_num:0	1330			0	525	nalidixic acid
	1_1435 # 1546825 # 1548471 # -1 # ID=1_1435;partial=00;start_type=ATG;rbs_motif=GAG;rbs_spacer=6bp;gc_cont=0.541	1_1435	1546825	1548471	-	Strict	400	718.8	ArnT	62.61	3005053	protein homolog model	n/a	n/a	peptide antibiotic	antibiotic target alteration	pmr phosphoethanolamine transferase	ATGATGAAATCGATACGCTATTATCTGGCTTTCGCCGCATTTATCGCGCTCTACTATGTTATTCCTGTCAATAGCCGCCTGCTCTGGCAGCCGGATGAAACGCGCTATGCCGAAATAAGTCGGGAGATGCTGGCGTCTGGCGACTGGATCGTGCCGCATTTTCTGGGATTACGTTATTTTGAAAAACCGATAGCCGGTTACTGGATAAACAGTCTGGGTCAGTGGCTTTTTGGCGCTACCAATTTTGGCGTGCGGGCTGGCGCTATTTTAACGACATTGCTGGCCGCAGCGCTGGTGGCGTGGCTGACGTTCCGCTTATGGCGGGATAAACGTACCGCGTTGCTCGCCTCCGTTATCTTTCTCTCCCTCTTTGCCGTTTACAGTATCGGGACGTATGCG…	MMKSIRYYLAFAAFIALYYVIPVNSRLLWQPDETRYAEISREMLASGDWIVPHFLGLRYFEKPIAGYWINSLGQWLFGATNFGVRAGAILTTLLAAALVAWLTFRLWRDKRTALLASVIFLSLFAVYSIGTYAVLDPMIALWLTAGMCCFWQGMQATTRTGKIGMFLLLGATCGLGVLTKGFLALAVPVVSVLPWVIVQKRWKDFLLYGWLAVLSCFVVVLPWAIAIARREADFWHYFFWVEHIQRFAMSDAQHKAPFWYYLPVLLAGSLPWLGLLPGALKLGWRERNGAFYLLGWTIMPLLFFSIAKGKLPTYVLSCFAPIAILMARFVLHNVKEGVAALRVNGGINLVFGIIGIVAAFVVSSWGPLKSPVWTHIETYKVFCVWGVFTVWAFVGWYSL…	MKSIRYGVSLIALFALYYLLPLNFRLLWQPDETRYAEISREMLATGDWVVPHFLGLRYFEKPIAGYWINSIGQWLFGHNNFGVRFGSVFAITMTALLVAWLAWRIFRDKRVAILSLIIFLTAMLVYAIGTYAVLDPMITLWLALAMCSFWGAVQAHSRSGKILGYVLLGVACGMGVMTKGFLALAVPVVGVLPWVIARKRWREVLTYGWLAVIVCTLVVLPWGLAIAQREPDFWRYFFWVEHIQRFAEKDAQHKAPFWYYIPFLIAGSLPWLALLPGALKRGWLERDEARGALYLLGWVAMPFLFFSIAKGKLPTYILPCFAPLSILMARYALEAAKTGAKALRINGMINLGVGLLGLIAVLVVSPWGFMHKPVWTKIELYKCLLAAIAFAVWALMGWL…	99.46	gnl|BL_ORD_ID|2779|hsp_num:0	3795			0	1653	colistin A; colistin B
	1_1438 # 1551343 # 1552326 # -1 # ID=1_1438;partial=00;start_type=ATG;rbs_motif=AGGA;rbs_spacer=8bp;gc_cont=0.538	1_1438	1551343	1552326	-	Strict	550	554.7	PmrF	87.42	3003578	protein homolog model	n/a	n/a	peptide antibiotic	antibiotic target alteration	pmr phosphoethanolamine transferase	ATGTTTGACGCCGCCCCCATAAAAAAAGTCTCGGTGGTTATTCCTGTCTATAACGAACAGGAAAGCCTGCCGGAATTGATAAGACGCACCACCGCCGCCTGCGAGAGTCTGGGCAAAGCGTGGGAGATTTTATTGATAGATGATGGTAGCAGCGATAGCTCGGCGGAGCTGATGGTTAAGGCGTCCCAGGAAGCCGATAGCCATATCATCTCTATTTTACTCAACCGTAACTACGGTCAACATGCAGCGATCATGGCGGGGTTTAGCCATGTAAGCGGCGATCTCATCATTACGCTGGATGCCGATCTGCAAAACCCGCCGGAAGAGATCCCGCGCCTGGTGGCGAAAGCCGATGAAGGGTTCGATGTGGTAGGCACCGTGCGCCAGAACCGACAGGAC…	MFDAAPIKKVSVVIPVYNEQESLPELIRRTTAACESLGKAWEILLIDDGSSDSSAELMVKASQEADSHIISILLNRNYGQHAAIMAGFSHVSGDLIITLDADLQNPPEEIPRLVAKADEGFDVVGTVRQNRQDSLFRKSASKIINLLIQRTTGKAMGDYGCMLRAYRRPIIDTMLRCHERSTFIPILANIFARRATEIPVHHAEREFGDSKYSFMRLINLMYDLVTCLTTTPLRLLSLLGSVIAIGGFSLSVLLIVLRLALGPQWAAEGVFMLFAVLFTFIGAQFIGMGLLGEYIGRIYNDVRARPRYFVQQVIYPESTPFTEESHQ	MFEIHPVKKVSVVIPVYNEQESLPELIRRTTTACESLGKEYEILLIDDGSSDNSAHMLVEASQAENSHIVSILLNRNYGQHSAIMAGFSHVTGDLIITLDADLQNPPEEIPRLVAKADEGYDVVGTVRQNRQDSWFRKTASKMINRLIQRTTGKAMGDYGCMLRAYRRHIVDAMLHCHERSTFIPILANIFARRAIEIPVHHAEREFGESKYSFMRLINLMYDLVTCLTTTPLRMLSLLGSIIAIGGFSIAVLLVILRLTFGPQWAAEGVFMLFAVLFTFIGAQFIGMGLLGEYIGRIYTDVRARPRYFVQQVIRPSSKENE	101.55	gnl|BL_ORD_ID|1936|hsp_num:0	2014			0	954	polymyxin B
	1_1711 # 1852269 # 1853693 # 1 # ID=1_1711;partial=00;start_type=TTG;rbs_motif=AGG;rbs_spacer=6bp;gc_cont=0.538	1_1711	1852269	1853693	+	Strict	900	909.1	MdtK	99.16	3001327	protein homolog model	n/a	n/a	fluoroquinolone antibiotic	antibiotic efflux	multidrug and toxic compound extrusion (MATE) transporter	TTGAACGTCTCCACTGCCTTACGCCAGGCTGTCGTCCGTACGCCCTGGTATGCCAAACGCAAGAGCTACAAAGTGTTGTTCTGGCGTGAAATCACCCCACTTGCTATCCCTATTTTTCTGGAAAATACCTGTGTTTTGCTAATGGGCGTGCTCAGTACTTTTCTCGTCAGTTGGCTGGGCAAGGAAGCAATGGCGGGCGTGGGGCTTGCCGACAGTTTTAATATGGTAATTATGGCTTTTTTTGCGGCTATCGATCTTGGTACTACGGTGGTGGTTGCCTTTAGCCTGGGCAAGCGCGACAGGCGACGGGCAAGGGCGGCGGCGCGCCAGTCGCTGGTGATTATGACGCTATTTGCCGTTGTGCTGGCAGTGGTCATTCATTATTTCGGCAGTGAAATT…	MNVSTALRQAVVRTPWYAKRKSYKVLFWREITPLAIPIFLENTCVLLMGVLSTFLVSWLGKEAMAGVGLADSFNMVIMAFFAAIDLGTTVVVAFSLGKRDRRRARAAARQSLVIMTLFAVVLAVVIHYFGSEIINIVAGEATSEVKGLALTYLELTVLSYPAAAIALIGSGALRGAGNTKIPLMINGGMNILNIIISSILIYGAFSWQGLGFAGAGLGLTISRYIGAVAIIWVLMIGFNPALRIPLKSYLKPLNFGIIWEVMGIGIPASIESVLFNGGKLLTQMFVAGMGTNVIAGNFIAFSVAALINLPGNALGSASTIITGKRLGTGQIGQAERQLRHVFWMSTIVLTAIAWGTAPFAGLFASFYTQEQDVKEVVKVLLWLNAVFMPIWAAAWVLPS…	MNVSTALRQAVVRTPWYAKRKSYKVLFWREITPLAIPIFLENTCVLLMGVLSTFLVSWLGKEAMAGVGLADSFNMVIMAFFAAIDLGTTVVVAFSLGKRDRRRARAAARQSLVIMTLFAVVLAVVIHYFGSEIINIVAGEATPEVKGLALTYLELTVLSYPAAAIALIGSGALRGAGNTKIPLMINGGMNILNIIISSILIYGAFSWQGLGFAGAGLGLTISRYIGAVAIIWVLMIGFNPALRIPLKSYLKPLNFGIIWEVMGIGIPASIESVLFNGSKLLTQMFVAGMGTNVIAGNFIAFSVAALINLPGNALGSASTIITGKRLGTGQIGQAERQLRHVFWMSTIVLTAIAWGTAPFAGLFASFYTQEQDVKEVVKVLLWLNAAFMPIWAAAWVLPS…	100	gnl|BL_ORD_ID|1649|hsp_num:0	1752			0	1422	ciprofloxacin
	1_2154 # 2282425 # 2282787 # 1 # ID=1_2154;partial=00;start_type=ATG;rbs_motif=AGGAG;rbs_spacer=7bp;gc_cont=0.446	1_2154	2282425	2282787	+	Strict	150	169.1	Klebsiella pneumoniae KpnE	76.67	3004580	protein homolog model	n/a	n/a	macrolide antibiotic; aminoglycoside antibiotic; cephalosporin; tetracycline antibiotic; peptide antibiotic; rifamycin antibiotic; disinfecting agents and antiseptics	antibiotic efflux	small multidrug resistance (SMR) antibiotic efflux pump	ATGTTTTACTGGATTTTATTAGCTCTGGCTATCGCGACTGAAATTACCGGCACGCTCTCAATGAAATGGGCTAGCGTGGGTAATGGCAATGCGGGTTTTATTTTAATGCTGGTGATGATCACGCTGTCATATATATTTCTTTCTTTTGCGGTAAAAAAGATTGCCCTGGGTGTAGCGTATGCCTTATGGGAAGGGATCGGCATTTTATTTATTACCATTTTTAGCGTGCTGCTATTTGATGAAGCATTATCAACCATGAAGATTGCCGGCTTGCTGACGCTGGTCGCCGGCATAGTATTGATCAAATCAGGGACGCGTAAACCCGGCAAACCGGTGAAGGAGGCGACTCGTGCAACAATTTGA	MFYWILLALAIATEITGTLSMKWASVGNGNAGFILMLVMITLSYIFLSFAVKKIALGVAYALWEGIGILFITIFSVLLFDEALSTMKIAGLLTLVAGIVLIKSGTRKPGKPVKEATRATI	MFYWILLALAIIAEITGTLSMKWASVSGGHTGFILMLAMIALSYIFLAFAVKKIALGVAYALWEGIGILLITLFSVLLFDESLSLLKIAGLTTLVIGIVLIKSGTQKKASSQQEVAHAAV	100	gnl|BL_ORD_ID|2715|hsp_num:0	3283			0	360	erythromycin; streptomycin; tetracycline; cefepime; ceftriaxone; rifampin; colistin A; colistin B; triclosan; benzalkonium chloride; chlorhexidine
	1_2155 # 2282774 # 2283103 # 1 # ID=1_2155;partial=00;start_type=GTG;rbs_motif=AGGAG;rbs_spacer=7bp;gc_cont=0.558	1_2155	2282774	2283103	+	Strict	150	189.1	Klebsiella pneumoniae KpnF	87.16	3004583	protein homolog model	n/a	n/a	macrolide antibiotic; aminoglycoside antibiotic; cephalosporin; tetracycline antibiotic; peptide antibiotic; rifamycin antibiotic; disinfecting agents and antiseptics	antibiotic efflux	small multidrug resistance (SMR) antibiotic efflux pump	GTGCAACAATTTGAATGGATACACGGCGCCTGGCTTGGGCTGGCAATAATGCTGGAAATCGCGGCTAACGTACTGTTGAAATTTTCGGACGGCTTTCGCCGTAAATGCTATGGCATCTTATCGCTTGCCGCTGTTCTGGCCGCCTTCAGCGCGCTTTCCCAGGCGGTAAAAGGGATAGACCTGTCGGTGGCGTATGCGTTATGGGGCGGTTTTGGTATTGCCGCCACGCTGGCGGCGGGCTGGGTGCTCTTCGGCCAGCGCTTAAACCCCAAAGGCTGGGTTGGCGTGATATTGCTGCTCGCCGGAATGGTCATGATCAAATTTGCCTGA	MQQFEWIHGAWLGLAIMLEIAANVLLKFSDGFRRKCYGILSLAAVLAAFSALSQAVKGIDLSVAYALWGGFGIAATLAAGWVLFGQRLNPKGWVGVILLLAGMVMIKFA	MQQFEWIHAAWLAIAIVLEIIANVFLKFSDGFRRKIYGILSLAAVLGAFSALSQAVKGIDLSVAYALWGGFGIAATIAAGWVLFGQRLNNKGWAGVILLVAGMVLIKLA	100	gnl|BL_ORD_ID|2717|hsp_num:0	3286			0	327	erythromycin; streptomycin; tetracycline; cefepime; ceftriaxone; rifampin; colistin A; colistin B; triclosan; benzalkonium chloride; chlorhexidine
	1_2192 # 2319284 # 2319667 # -1 # ID=1_2192;partial=00;start_type=ATG;rbs_motif=GAGG;rbs_spacer=7bp;gc_cont=0.471	1_2192	2319284	2319667	-	Strict	230	247.3	marA	95.24	3000263	protein homolog model	n/a	n/a	fluoroquinolone antibiotic; monobactam; carbapenem; cephalosporin; glycylcycline; cephamycin; penam; tetracycline antibiotic; rifamycin antibiotic; phenicol antibiotic; penem; disinfecting agents and antiseptics	antibiotic efflux; reduced permeability to antibiotic	resistance-nodulation-cell division (RND) antibiotic efflux pump; General Bacterial Porin with reduced permeability to beta-lactams	ATGTCCAGACGCAACACTGACGCTATTACTATTCATAGCATTTTGGACTGGATCGAGGATAACCTGGAGTCGCCGCTCTCACTGGAAAAAGTGTCTGAGCGTTCAGGATATTCCAAATGGCACCTGCAACGGATGTTTAAAAAAGAGACCGGTCATTCATTAGGCCAATACATCCGCAGCCGTAAAATGACGGAAATCGCGCAAAAATTAAAAGAGAGCAACGAGCCCATTCTCTATCTGGCGGAACGCTATGGCTTTGAGTCACAGCAAACATTGACCCGGACGTTCAAAAACTACTTTGATGTGCCGCCACACAAATACCGGATCACCAATATGCATGGCGAATCACGGTATATGCTGCCGCTGAACCATGGCAACTACTAG	MSRRNTDAITIHSILDWIEDNLESPLSLEKVSERSGYSKWHLQRMFKKETGHSLGQYIRSRKMTEIAQKLKESNEPILYLAERYGFESQQTLTRTFKNYFDVPPHKYRITNMHGESRYMLPLNHGNY	MSRRNTDAITIHSILDWIEDNLESPLSLEKVSERSGYSKWHLQRMFKKETGHSLGQYIRSRKMTEIAQKLKESNEPILYLAERYGFESQQTLTRTFKNYFDVPPHKYRMTNMQGESRFLHPLNHYNS	100	gnl|BL_ORD_ID|1771|hsp_num:0	1922			0	378	tigecycline; tetracycline; rifampin; chloramphenicol; ampicillin; cefalotin; triclosan
	1_2287 # 2425023 # 2425460 # 1 # ID=1_2287;partial=00;start_type=ATG;rbs_motif=AGGAG;rbs_spacer=7bp;gc_cont=0.523	1_2287	2425023	2425460	+	Strict	275	298.1	AAC(6')-Iy	97.24	3002569	protein homolog model	n/a	n/a	aminoglycoside antibiotic	antibiotic inactivation	AAC(6')	ATGGACATCAGGCAAATGAACAAAACCCATCTGGAGCACTGGCGCGGATTGCGAAAACAGCTCTGGCCCGGTCACCCGGATGACGCCCATCTGGCAGACGGCGAAGAAATCCTGCAAGCCGATCATTTGGCATCATTTGTTGCGATGGCAGACGGGGTGGCGATTGGCTTTGCGGATGCCTCAATCCGCCACGATTATGTCAATGGCTGTGACAGTTCGCCCGTGGCTTTTCTTGAAGGTATTTTTGTTCTCCCCTCGTTCCGTCAACGCGGCGTAGCGAAACAATTGATTGCAGCGGTGCAACGATGGGGAACGAATAAAGGGTGTCGGGAAATGGCCTCTGATACCACGCCGGAAAATACAATTTCCCAGAAAGTTCACCTGGCATTAGGATTTGAG…	MDIRQMNKTHLEHWRGLRKQLWPGHPDDAHLADGEEILQADHLASFVAMADGVAIGFADASIRHDYVNGCDSSPVAFLEGIFVLPSFRQRGVAKQLIAAVQRWGTNKGCREMASDTTPENTISQKVHLALGFEETERVIFYRKRC	MDIRQMNKTHLEHWRGLRKQLWPGHPDDAHLADGEEILQADHLASFIAMADGVAIGFADASIRHDYVNGCDSSPVVFLEGIFVLPSFRQRGVAKQLIAAVQRWGTNKGCREMASDTSPENTISQKVHQALGFEETERVIFYRKRC	100	gnl|BL_ORD_ID|330|hsp_num:0	360			0	435	dibekacin; amikacin; sisomicin; netilmicin; tobramycin; 2'-N-ethylnetilmicin; 5-episisomicin
	1_2445 # 2582082 # 2582495 # 1 # ID=1_2445;partial=00;start_type=ATG;rbs_motif=GAG;rbs_spacer=9bp;gc_cont=0.454	1_2445	2582082	2582495	+	Strict	240	245.7	H-NS	94.89	3000676	protein homolog model	n/a	n/a	macrolide antibiotic; fluoroquinolone antibiotic; cephalosporin; cephamycin; penam; tetracycline antibiotic	antibiotic efflux	major facilitator superfamily (MFS) antibiotic efflux pump; resistance-nodulation-cell division (RND) antibiotic efflux pump	ATGAGCGAAGCACTTAAAATTCTGAACAACATCCGTACTCTTCGTGCGCAGGCAAGAGAATGTACTCTGGAAACGCTTGAAGAAATGCTGGAAAAATTAGAAGTTGTCGTTAATGAGCGTCGTGAAGAAGAAAGCGCTGCTGCTGCTGAAGTGGAAGAACGCACTCGTAAACTGCAACAGTATCGTGAAATGTTAATTGCCGACGGCATTGACCCGAATGAACTGCTGAATAGCATGGCTGCCGCTAAATCCGGTACCAAAGCTAAACGCGCAGCTCGTCCGGCTAAATATAGCTATGTTGACGAAAACGGTGAAACTAAAACCTGGACTGGCCAGGGTCGTACACCGGCTGTAATCAAAAAAGCAATGGAAGAACAAGGTAAGCAACTGGAAGATTTC…	MSEALKILNNIRTLRAQARECTLETLEEMLEKLEVVVNERREEESAAAAEVEERTRKLQQYREMLIADGIDPNELLNSMAAAKSGTKAKRAARPAKYSYVDENGETKTWTGQGRTPAVIKKAMEEQGKQLEDFLIKE	MSEALKILNNIRTLRAQARECTLETLEEMLEKLEVVVNERREEESAAAAEVEERTRKLQQYREMLIADGIDPNELLNSLAAVKSGTKAKRAQRPAKYSYVDENGETKTWTGQGRTPAVIKKAMDEQGKSLDDFLIKQ	100	gnl|BL_ORD_ID|1144|hsp_num:0	1248			0	411	erythromycin; cloxacillin; ciprofloxacin; tetracycline; oxacillin; norfloxacin
	1_2664 # 2796075 # 2796797 # -1 # ID=1_2664;partial=00;start_type=ATG;rbs_motif=None;rbs_spacer=None;gc_cont=0.492	1_2664	2796075	2796797	-	Strict	470	488.4	sdiA	99.58	3000826	protein homolog model	n/a	n/a	fluoroquinolone antibiotic; cephalosporin; glycylcycline; penam; tetracycline antibiotic; rifamycin antibiotic; phenicol antibiotic; disinfecting agents and antiseptics	antibiotic efflux	resistance-nodulation-cell division (RND) antibiotic efflux pump	ATGCAGGAAAATGATTTCTTCACCTGGCGACGCGCAATGTTGTTACGCTTTCAGGAGATGGCGGCAGCAGAGGATGTTTATACTGAATTGCAATATCAGACACAGCGGCTGGAATTTGATTATTATGCCCTGTGTGTTCGTCATCCCGTCCCCTTTACCCGGCCTAAAATATCGCTTCGTACCACTTATCCTCCGGCGTGGGTAACGCATTACCAGTCCGAAAACTATTTTGCGATCGATCCGGTATTAAAGCCGGAAAATTTCAGGCAGGGTCATTTACATTGGGATGACGTGCTATTTCATGAAGCGCAGGCGATGTGGGATGCCGCCCAGCGTTTCGGATTACGCAGAGGCGTAACCCAGTGTGTGATGTTGCCGAACCGGGCGCTGGGCTTTTTA…	MQENDFFTWRRAMLLRFQEMAAAEDVYTELQYQTQRLEFDYYALCVRHPVPFTRPKISLRTTYPPAWVTHYQSENYFAIDPVLKPENFRQGHLHWDDVLFHEAQAMWDAAQRFGLRRGVTQCVMLPNRALGFLSFSRSSLRCSSFTYDEVELRLQLLARESLSALTRFEDDMVMAPEMRFSKREKEILKWTAEGKTSSEIAIILSISENTVNFHQKNMQKKFNAPNKTQIACYAAATGLI	MQENDFFTWRRAMLLRFQEMAAAEDVYTELQYQTQRLEFDYYALCVRHPVPFTRPKISLRTTYPPAWVTHYQSENYFAIDPVLKPENFRQGHLHWDDVLFHEAKAMWDAAQRFGLRRGVTQCVMLPNRALGFLSFSRSSLRCSSFTYDEVELRLQLLARESLSALTRFEDDMVMAPEMRFSKREKEILKWTAEGKTSSEIAIILSISENTVNFHQKNMQKKFNAPNKTQIACYAAATGLI	100	gnl|BL_ORD_ID|208|hsp_num:0	228			0	720	tigecycline; tetracycline; rifampin; chloramphenicol; ampicillin; cefalotin; triclosan
	1_2834 # 2964144 # 2965892 # -1 # ID=1_2834;partial=00;start_type=ATG;rbs_motif=None;rbs_spacer=None;gc_cont=0.516	1_2834	2964144	2965892	-	Strict	1000	1067.4	msbA	96.39	3003950	protein homolog model	n/a	n/a	nitroimidazole antibiotic	antibiotic efflux	ATP-binding cassette (ABC) antibiotic efflux pump	ATGCATAACGATAAAGATCTCTCTACGTGGCAGACCTTCCGCCGACTGTGGCCAACCATAGCGCCTTTTAAAGCAGGTCTGATCGTGGCGGGCATAGCGTTAATTCTCAACGCAGCCAGCGATACCTTCATGCTATCGCTCCTCAAGCCATTACTGGATGATGGTTTCGGTAAAACGGATCGCTCAGTGTTGCTGTGGATGCCGCTGGTGGTTATTGGGCTGATGATATTACGAGGCATCACTAGCTATATCTCCAGCTACTGTATTTCATGGGTGTCAGGCAAGGTGGTAATGACCATGCGCCGTCGCCTGTTTGGCCATATGATGGGAATGCCCGTCGCCTTCTTTGATAAACAGTCTACCGGTACGCTGCTGTCGCGTATTACTTACGATTCAGAA…	MHNDKDLSTWQTFRRLWPTIAPFKAGLIVAGIALILNAASDTFMLSLLKPLLDDGFGKTDRSVLLWMPLVVIGLMILRGITSYISSYCISWVSGKVVMTMRRRLFGHMMGMPVAFFDKQSTGTLLSRITYDSEQVASSSSGALITVVREGASIIGLFIMMFYYSWQLSIILVVLAPIVSIAIRVVSKRFRSISKNMQNTMGQVTTSAEQMLKGHKEVLIFGGQEVETKRFDKVSNKMRLQGMKMVSASSISDPIIQLIASLALAFVLYAASFPSVMDSLTAGTITVVFSSMIALMRPLKSLTNVNAQFQRGMAACQTLFAILDSEQEKDEGKRVIDRATGDLEFRNVTFTYPGREVPALRNINLKIPAGKTVALVGRSGSGKSTIASLITRFYDIDEGH…	MHNDKDLSTWQTFRRLWPTIAPFKAGLIVAGVALILNAASDTFMLSLLKPLLDDGFGKTDRSVLVWMPLVVIGLMILRGITSYVSSYCISWVSGKVVMTMRRRLFGHMMGMPVSFFDKQSTGTLLSRITYDSEQVASSSSGALITVVREGASIIGLFIMMFYYSWQLSIILIVLAPIVSIAIRVVSKRFRNISKNMQNTMGQVTTSAEQMLKGHKEVLIFGGQEVETKRFDKVSNRMRLQGMKMVSASSISDPIIQLIASLALAFVLYAASFPSVMDSLTAGTITVVFSSMIALMRPLKSLTNVNAQFQRGMAACQTLFTILDSEQEKDEGKRVIERATGDVEFRNVTFTYPGRDVPALRNINLKIPAGKTVALVGRSGSGKSTIASLITRFYDIDEGE…	100	gnl|BL_ORD_ID|2183|hsp_num:0	2423			0	1746	metronidazole
	1_2909 # 3052863 # 3054095 # -1 # ID=1_2909;partial=00;start_type=ATG;rbs_motif=GAG;rbs_spacer=5bp;gc_cont=0.554	1_2909	3052863	3054095	-	Strict	700	700.7	Escherichia coli mdfA	87.71	3001328	protein homolog model	n/a	n/a	tetracycline antibiotic; disinfecting agents and antiseptics	antibiotic efflux	major facilitator superfamily (MFS) antibiotic efflux pump	ATGCAGAATCGTTTACAATCAGGCGGCAGGCTGGGACGTCAGGCGCTGCTTTTTCCTCTCTGTCTGGTGCTGTACGAATTTTCTACTTATATTGGCAACGACATGATCCAGCCGGGTATGCTGGCGGTGGTTGAGCAGTATCAGGCGTGCCTGGACTGGGTTCCGACGTCCATGACCGCTTATCTGGCGGGCGGTATGTTCTTACAGTGGCTGCTTGGCCCGTTGTCTGACCGGATTGGCCGTCGTCCCGTGATGCTGGCGGGCGTCGTGTGGTTTATTGTCACCTGCCTGGCGACGTTACTGGCGAAAAACATCGAACAATTTACCTTCCTGCGTTTTTTGCAAGGGATTAGCCTGTGTTTTATCGGCGCTGTAGGGTATGCCGCGATTCAGGAGTCC…	MQNRLQSGGRLGRQALLFPLCLVLYEFSTYIGNDMIQPGMLAVVEQYQACLDWVPTSMTAYLAGGMFLQWLLGPLSDRIGRRPVMLAGVVWFIVTCLATLLAKNIEQFTFLRFLQGISLCFIGAVGYAAIQESFEEAVCIKITALMANVALIAPLLGPLVGAAWVHVLPWEGMFILFAALAAIAFFGLQRAMPETATRRGETLSFKALGRDYRLVIKNRRFVAGALALGFVSLPLLAWIAQSPIIIISGEQLSSYEYGLLQVPVFGALIAGNLVLARLTSRRTVRSLIVMGGWPIVAGLIIAAAATVVSSHAYLWMTAGLSVYAFGIGLANAGLVRLTLFSSDMSKGTVSAAMGMLQMLIFTVGIEVSKHAWLSGGNGLFSLFNLANGILWLLLMLVFL…	MQNKLASGARLGRQALLFPLCLVLYEFSTYIGNDMRQPGMLENVEQYQAGIEWVPTSMNAYLAGGMFIQWLLGPLSDRIGRRPVMLAGVVWFIVTCLAILLAQNIEQFTLLRFLHGISLCFIGAVGYDAIQESFEEAVCIKITALMANVALIAPLLGPLVGASWIHVLPWEGMFVLFAALAAISFFGLQRAMPETATRIGEKLSLKELGRDYKLVLKNGRFVAGALALGFLSLPLLAWIAQSPIIIITGEQLSSYEYGLLQVPIFGALIAGNLLLARLTSRRTVRSLIIMGGWPIMIGLLVAAAATVISSHAYLWMTAGLSIYAFGIGLANAGLVRLTLFASVMSKGTVSAAMGMLQMLIFTVGIEISKHAWLNGGNGLFNLFNLVNGILLLSLMVIFL…	100	gnl|BL_ORD_ID|2417|hsp_num:0	37			0	1221	tetracycline; benzalkonium chloride
	1_3059 # 3212395 # 3213072 # 1 # ID=1_3059;partial=00;start_type=GTG;rbs_motif=GAGGA;rbs_spacer=3bp;gc_cont=0.563	1_3059	3212395	3213072	+	Strict	400	422.9	kdpE	91.96	3003841	protein homolog model	n/a	n/a	aminoglycoside antibiotic	antibiotic efflux	kdpDE	GTGACAAACGTTCTGATTGTTGAAGATGAACAGGCCATCCGCCGCTTTCTGCGCGCCGCGCTGGAAGGCGACGGCCTGCGCGTGTATGAAGCTGAAACATTACAACGTGGTTTACTGGAAGCCGCCACGCGAAAGCCCGATCTGATTATTCTCGATCTCGGCCTGCCGGACGGCGACGGAATCGATTTCATTCGCGACCTGCGTCAGTGGAGCGCAATACCGGTGATTGTCCTTTCCGCCCGCAGCGAAGAAAGCGATAAGATTGCCGCGCTTGACGCCGGAGCTGATGATTACCTGAGCAAGCCATTCGGCATTGGCGAGTTGCAGGCGCGTTTGCGTGTCGCGCTGCGACGGCACGCCGCCAGCCCTAGCGCCGATCCGATCGTCCGTTTTTCCGGC…	MTNVLIVEDEQAIRRFLRAALEGDGLRVYEAETLQRGLLEAATRKPDLIILDLGLPDGDGIDFIRDLRQWSAIPVIVLSARSEESDKIAALDAGADDYLSKPFGIGELQARLRVALRRHAASPSADPIVRFSGVTVDLAARLIHRGDEEIHLTPIEFRLLAVLLNNTGKVLTQRQLLNQVWGPNAVEHSHYLRIYMGHLRQKLEQDPTRPRHFITETGIGYRFMP	MTNVLIVEDEQAIRRFLRTALEGDGMRVFEAETLQRGLLEAATRKPDLIILDLGLPDGDGIEFIRDLRQWSAVPVIVLSARSEESDKIAALDAGADDYLSKPFGIGELQARLRVALRRHSATTAPDPLVKFSDVTVDLAARVIHRGEEEVHLTPIEFRLLAVLLNNAGKVLTQRQLLNQVWGPNAVEHSHYLRIYMGHLRQKLEQDPARPRHFITETGIGYRFML	100	gnl|BL_ORD_ID|2101|hsp_num:0	2331			0	672	kanamycin A
	1_3273 # 3438484 # 3439677 # 1 # ID=1_3273;partial=00;start_type=ATG;rbs_motif=GAGG;rbs_spacer=7bp;gc_cont=0.554	1_3273	3438484	3439677	+	Strict	670	691	Escherichia coli acrA	91.69	3004043	protein homolog model	n/a	n/a	fluoroquinolone antibiotic; cephalosporin; glycylcycline; penam; tetracycline antibiotic; rifamycin antibiotic; phenicol antibiotic; disinfecting agents and antiseptics	antibiotic efflux	resistance-nodulation-cell division (RND) antibiotic efflux pump	ATGAACAAAAACAGAGGGTTAACGCCTCTGGCGGTCGTTCTGATGCTCTCAGGCAGCTTAGCGCTAACAGGATGTGACGACAAACAGGACCAGCAAGGCGGCCAGCAGATGCCAGAAGTTGGAGTTGTCACACTAAAAACGGAACCACTGCAAATCACAACTGAACTTCCGGGTCGTACCGTTGCTTACCGTATCGCCGAAGTTCGCCCACAGGTAAGCGGCATTATCCTGAAGCGTAATTTCGTTGAGGGAAGTGATATCGAAGCGGGAGTCTCTCTCTATCAGATTGATCCTGCGACCTACCAGGCGACTTACGACAGCGCTAAGGGCGATCTGGCAAAAGCGCAGGCCGCCGCGAATATCGCTGAACTGACGGTGAAGCGTTATCAAAAGCTGCTG…	MNKNRGLTPLAVVLMLSGSLALTGCDDKQDQQGGQQMPEVGVVTLKTEPLQITTELPGRTVAYRIAEVRPQVSGIILKRNFVEGSDIEAGVSLYQIDPATYQATYDSAKGDLAKAQAAANIAELTVKRYQKLLGTQYISKQEYDQALADAQQATAAVVAAKAAVETARINLAYTKVTSPISGRIGKSSVTEGALVQNGQASALATVQQLDPIYVDVTQSSNDFLRLKQELANGSLKQENGKAKVDLVTSDGIKFPQSGTLEFSDVTVDQTTGSITLRAIFPNPDHTLLPGMFVRARLQEGTKPTALLVPQQGVTRTPRGDATVLVVGADNKVETRQIVASQAIGDKWLVTDGLKAGDRVVVSGLQKVRPGAQVKVQEITADNKQQAASGDQPAQPRS	MNKNRGFTPLAVVLMLSGSLALTGCDDKQAQQGGQQMPAVGVVTVKTEPLQITTELPGRTSAYRIAEVRPQVSGIILKRNFKEGSDIEAGVSLYQIDPATYQATYDSAKGDLAKAQAAANIAQLTVNRYQKLLGTQYISKQEYDQALADAQQANAAVTAAKAAVETARINLAYTKVTSPISGRIGKSNVTEGALVQNGQATALATVQQLDPIYVDVTQSSNDFLRLKQELANGTLKQENGKAKVSLITSDGIKFPQDGTLEFSDVTVDQTTGSITLRAIFPNPDHTLLPGMFVRARLEEGLNPNAILVPQQGVTRTPRGDATVLVVGADDKVETRPIVASQAIGDKWLVTEGLKAGDRVVISGLQKVRPGVQVKAQEVTADNNQQAASGAQPEQSKS	100	gnl|BL_ORD_ID|2319|hsp_num:0	2661			0	1191	tigecycline; tetracycline; rifampin; chloramphenicol; ampicillin; cefalotin; triclosan
	1_3274 # 3439700 # 3442849 # 1 # ID=1_3274;partial=00;start_type=ATG;rbs_motif=AGGAG;rbs_spacer=10bp;gc_cont=0.543	1_3274	3439700	3442849	+	Strict	1900	1902.5	acrB	94.66	3000216	protein homolog model	n/a	n/a	fluoroquinolone antibiotic; cephalosporin; glycylcycline; penam; tetracycline antibiotic; rifamycin antibiotic; phenicol antibiotic; disinfecting agents and antiseptics	antibiotic efflux	resistance-nodulation-cell division (RND) antibiotic efflux pump	ATGCCTAATTTCTTTATCGATCGCCCTATATTTGCGTGGGTGATCGCCATCATCATCATGTTGGCAGGGGGGCTCGCGATCCTCAAATTGCCGGTAGCGCAATATCCGACGATTGCGCCACCAGCAGTGACGATCTCCGCAACCTACCCTGGCGCTGATGCGAAAACGGTACAGGATACCGTCACGCAGGTTATCGAACAGAATATGAACGGTATCGATAACCTGATGTATATGTCCTCCAACAGTGACTCCACGGGGACCGTGCAGATCACGCTGACCTTTGAATCCGGCACCGATGCGGATATCGCGCAGGTTCAGGTTCAGAACAAGTTGCAACTGGCAATGCCTTTACTTCCCCAGGAAGTACAGCAACAGGGCGTGAGCGTTGAGAAGTCCTCA…	MPNFFIDRPIFAWVIAIIIMLAGGLAILKLPVAQYPTIAPPAVTISATYPGADAKTVQDTVTQVIEQNMNGIDNLMYMSSNSDSTGTVQITLTFESGTDADIAQVQVQNKLQLAMPLLPQEVQQQGVSVEKSSSSFLMVVGVINTDGTMTQEDISDYVAANMKDPISRTSGVGDVQLFGSQYAMRIWMNPTELTKYQLTPVDVINAIKAQNAQVAAGQLGGTPPVKGQQLNASIIAQTRLTSTDEFGKILLKVNQDGSQVRLRDVAKIELGGENYDVIAKFNGQPASGLGIKLATGANALDTATAIRAELKKMEPFFPPGMKIVYPYDTTPFVKISIHEVVKTLVEAIILVFLVMYLFLQNFRATLIPTIAVPVVLLGTFAVLAAFGFSINTLTMFGMV…	MPNFFIDRPIFAWVIAIIIMLAGGLAILKLPVAQYPTIAPPAVTISASYPGADAKTVQDTVTQVIEQNMNGIDNLMYMSSNSDSTGTVQITLTFESGTDADIAQVQVQNKLQLAMPLLPQEVQQQGVSVEKSSSSFLMVVGVINTDGTMTQEDISDYVAANMKDAISRTSGVGDVQLFGSQYAMRIWMNPNELNKFQLTPVDVITAIKAQNAQVAAGQLGGTPPVKGQQLNASIIAQTRLTSTEEFGKILLKVNQDGSRVLLRDVAKIELGGENYDIIAEFNGQPASGLGIKLATGANALDTAAAIRAELAKMEPFFPSGLKIVYPYDTTPFVKISIHEVVKTLVEAIILVFLVMYLFLQNFRATLIPTIAVPVVLLGTFAVLAAFGFSINTLTMFGMV…	100	gnl|BL_ORD_ID|1011|hsp_num:0	1104			0	3144	tigecycline; acriflavine; tetracycline; rifampin; chloramphenicol; ampicillin; cefalotin; triclosan
	1_3369 # 3537430 # 3538542 # 1 # ID=1_3369;partial=00;start_type=ATG;rbs_motif=None;rbs_spacer=None;gc_cont=0.517	1_3369	3537430	3538542	+	Strict	250	261.2	vanG	38.87	3002909	protein homolog model	n/a	n/a	glycopeptide antibiotic	antibiotic target alteration	glycopeptide resistance gene cluster; Van ligase	ATGGAATGGGTTTTTAAGATGGCGAAATTGCGGGTAGGAATAGTATTTGGCGGTAAGTCGGCGGAACATGAAGTGTCTTTGCAATCAGCGAAAAATATCGTTGATGCGATCGATAAAACCCGCTTCGACGTGGTGCTGTTAGGGATAGATAAGGCGGGACAATGGCATGTTAACGATGCGGAAAATTATTTGCAGAATGCAGACGATCCGGCACATATCGCGCTACGTCCTTCGGCAATCAGTCTGGCCCAGGTGCCTGGCAAACATCAACACCAATTGATTAACGCCCAGAACGGGCAGCCGCTACCGACGGTAGATGTTATTTTTCCTATCGTCCACGGTACGCTGGGCGAAGACGGCTCATTGCAGGGGATGCTGCGCGTCGCAAACTTACCGTTT…	MEWVFKMAKLRVGIVFGGKSAEHEVSLQSAKNIVDAIDKTRFDVVLLGIDKAGQWHVNDAENYLQNADDPAHIALRPSAISLAQVPGKHQHQLINAQNGQPLPTVDVIFPIVHGTLGEDGSLQGMLRVANLPFVGSDVLSSAACMDKDIAKRLLRDAGLNIAPFITLTRTNRHAFSFAEVESRLGLPLFVKPANQGSSVGVSKVANEAQYQQAVALAFEFDHKVVVEQGIKGREIECAVLGNDNPQASTCGEIVLNSEFYAYDTKYIDDNGAQVVVPAQLPSGVNDKIRAIAIQAYQTLGCAGMARVDVFLTADNEVVINEINTLPGFTNISMYPKLWQASGLGYTDLISRLIELALERHTANNALKTTM	MQNKKIAVIFGGNSTEYEVSLQSASAVFENINTNKFDIIPIGITRSGEWYHYTGEKEKILNNTWFEDSKNLCPVVVSQNRSVKGFLEIASDKYRIIKVDLVFPVLHGKNGEDGTLQGIFELAGIPVVGCDTLSSALCMDKDRAHKLVSLAGISVPKSVTFKRFNEEAAMKEIEANLTYPLFIKPVRAGSSFGITKVIEKQELDAAIELAFEHDTEVIVEETINGFEVGCAVLGIDELIVGRVDEIELSSGFFDYTEKYTLKSSKIYMPARIDAEAEKRIQEAAVTIYKALGCSGFSRVDMFYTPSGEIVFNEVNTIPGFTSHSRYPNMMKGIGLSFSQMLDKLIGLYVE	106.02	gnl|BL_ORD_ID|1069|hsp_num:0	1157			0	1047	vancomycin
	1_3395 # 3570838 # 3571302 # -1 # ID=1_3395;partial=00;start_type=ATG;rbs_motif=AGGAG;rbs_spacer=7bp;gc_cont=0.544	1_3395	3570838	3571302	-	Perfect	290	310.1	golS	100	3000504	protein homolog model	n/a	n/a	monobactam; carbapenem; cephalosporin; cephamycin; penam; phenicol antibiotic; penem	antibiotic efflux	resistance-nodulation-cell division (RND) antibiotic efflux pump	ATGAACATCGGTAAAGCAGCTAAAGCATCGAAAGTCTCGGCCAAAATGATTCGCTACTATGAACAGATTGGTCTGATTCCCGCGGCAAGTCGGACGGATTCCGGCTATCGGGCCTATACCCAGGCTGATGTTAATCAATTGCATTTTATACGCCGCGCGCGCGACCTCGGTTTTTCAGTTGCTGAAATCAGCGACTTACTGAATCTTTGGAATAACCAGTCGCGGCAAAGCGCTGACGTCAAACGCCTGGCGCAGACGCACATTGATGAACTGGACAGACGTATCCAGAACATGCAGCACATGGCGCAAACCCTCAAAGCGCTGATTCACTGCTGCGCCGGCGACGCGCTGCCAGATTGTCCCATTCTGCATACGCTTGGACAACCTGACGATAGCGAG…	MNIGKAAKASKVSAKMIRYYEQIGLIPAASRTDSGYRAYTQADVNQLHFIRRARDLGFSVAEISDLLNLWNNQSRQSADVKRLAQTHIDELDRRIQNMQHMAQTLKALIHCCAGDALPDCPILHTLGQPDDSEPEARTGAVLRRPRRHGLAKRL	MNIGKAAKASKVSAKMIRYYEQIGLIPAASRTDSGYRAYTQADVNQLHFIRRARDLGFSVAEISDLLNLWNNQSRQSADVKRLAQTHIDELDRRIQNMQHMAQTLKALIHCCAGDALPDCPILHTLGQPDDSEPEARTGAVLRRPRRHGLAKRL	100	gnl|BL_ORD_ID|36|hsp_num:0	44			0	462	chloramphenicol
	1_3398 # 3575102 # 3578269 # 1 # ID=1_3398;partial=00;start_type=ATG;rbs_motif=AGG;rbs_spacer=10bp;gc_cont=0.567	1_3398	3575102	3578269	+	Strict	750	1209.9	adeF	60.67	3000777	protein homolog model	n/a	n/a	fluoroquinolone antibiotic; tetracycline antibiotic	antibiotic efflux	resistance-nodulation-cell division (RND) antibiotic efflux pump	ATGAAATTCACCCACTTTTTCATTGCACGACCCATCTTCGCCATCGTCCTGTCGCTGTTAATGCTGCTGGCTGGCGCTATCGCCTTTTTAAAACTGCCGCTGAGTGAATATCCGGCCGTTACGCCGCCCACGGTACAGGTTAGCGCCAGCTACCCCGGCGCTAACCCGCAAGTGATTGCCGATACGGTAGCCGCGCCGCTGGAACAGGTGATCAACGGCGTTGACGGCATGTTGTATATGAATACCCAGATGGCCATTGATGGTCGCATGGTTATCTCTATCGCCTTCGAACAGGGAACCGATCCTGATATGGCGCAAATTCAGGTGCAAAACCGGGTATCCCGCGCGCTGCCTCGCCTGCCCGAAGAAGTCCAGCGAATTGGCGTTGTAACGGAGAAA…	MKFTHFFIARPIFAIVLSLLMLLAGAIAFLKLPLSEYPAVTPPTVQVSASYPGANPQVIADTVAAPLEQVINGVDGMLYMNTQMAIDGRMVISIAFEQGTDPDMAQIQVQNRVSRALPRLPEEVQRIGVVTEKTSPDMLMVVHLVSPQKRYDSLYLSNFAIRQVRDELARLPGVGDVLVWGAGEYAMRVWLDPAKIANRGLTASDIVTALREQNVQVAAGSVGQQPEASAAFQMTVNTLGRLTSEEQFGEIVVKIGADGEVTRLRDVARVTLGADAYTLRSLLNGEAAPALQIIQSPGANAIDVSNAIRGKMDELQQNFPQDIEYRIAYDPTVFVRASLQSVAITLLEALVLVVLVVVLFLQTWRASIIPLVAVPVSLVGTFALMHLFGFSLNTLSLFG…	MNISKFFIDRPIFAGVLSVLILLAGLLSVFQLPISEYPEVVPPSVVVRAQYPGANPKVIAETVASPLEESINGVEDMLYMQSQANSDGNLTITVNFKLGIDPDKAQQLVQNRVSQAMPRLPEDVQRLGVTTLKSSPTLTMVVHLTSPDNRYDMTYLRNYAVLNVKDRLARLQGVGEVGLFGSGDYAMRVWLDPQKVAQRNLTATEIVNAIREQNIQVAAGTIGASPSNSPLQLSVNAQGRLTTEQEFADIILKTAPDGAVTRLGDVARVELAASQYGLRSLLDNKQAVAIPIFQAPGANALQVSDQVRSTMKELSKDFPSSIKYDIVYDPTQFVRASIKAVVHTLLEAITLVVVVVILFLQTWRASIIPLLAVPVSIIGTFALMLAFGYSINALSLFGM…	99.62	gnl|BL_ORD_ID|133|hsp_num:0	153			0	3126	tetracycline
	1_3613 # 3815966 # 3816910 # -1 # ID=1_3613;partial=00;start_type=ATG;rbs_motif=GGAG;rbs_spacer=6bp;gc_cont=0.476	1_3613	3815966	3816910	-	Strict	500	562	leuO	86.62	3003843	protein homolog model	n/a	n/a	nucleoside antibiotic; disinfecting agents and antiseptics	antibiotic efflux	major facilitator superfamily (MFS) antibiotic efflux pump	ATGCCAGAGGTCAAAACCGAAAAGCCGCATCTTTTAGATATGGGCAAACCACAGCTTCGCATGGTTGATTTGAACCTATTGACCGTGTTCGATGCGGTAATGCAAGAGCAGAATATTACGCGCGCCGCCCACACGCTGGGAATGTCGCAGCCTGCGGTCAGTAACGCCGTAGCGCGTCTGAAGGTTATGTTTAATGACGAACTTTTTGTTCGATATGGACGAGGAATTCAGCCGACTGCCCGTGCATTTCAGTTATTTGGTTCAGTCCGTCAGGCGTTACAATTGGTGCAAAATGAATTGCCGGGATCGGGGTTTGAGCCGACCAGCAGCGAACGTGTATTCAATCTTTGCGTGTGCAGTCCGCTGGATAATATCCTGACGTCACAGATTTATAATCGT…	MPEVKTEKPHLLDMGKPQLRMVDLNLLTVFDAVMQEQNITRAAHTLGMSQPAVSNAVARLKVMFNDELFVRYGRGIQPTARAFQLFGSVRQALQLVQNELPGSGFEPTSSERVFNLCVCSPLDNILTSQIYNRVEKIAPNIHVVFKASLNQNTEHQLRYQETEFVISYEEFRRPEFTSVPLFKDEMVLVASRKHPRISGPLLEGDVYNEQHAVVSLDRYASFSQPWYDTPDKQSSVAYQGMVLISVLNVVSQTHLVAIAPRWLAEEFAESLDLQILPLPLKLNSRTCYLSWHEAAGRDKGHQWMEDLLVSVCKR	MPEVQTDHPETAELSKPQLRMVDLNLLTVFDAVMQEQNITRAAHALGMSQPAVSNAVARLKVMFNDELFVRYGRGIQPTARAFQLFGSVRQALQLVQNELPGSGFEPASSERVFHLCVCSPLDSILTSQIYNHIEQIAPNIHVMFKSSLNQNTEHQLRYQETEFVISYEDFHRPEFTSVPLFKDEMVLVASKNHPTIKGPLLKHDVYNEQHAAVSLDRFASFSQTWYDTVDKQASIAYQGMAMMSVLSVVSQTHLVAIAPRWLAEEFAESLELQVLPLPLKQNSRTCYLSWHEAAGRDKGHQWMEEQLVSICKR	100	gnl|BL_ORD_ID|4919|hsp_num:0	5921			0	942	acriflavine; puromycin
	1_54 # 57532 # 58923 # 1 # ID=1_54;partial=00;start_type=ATG;rbs_motif=AGGAG;rbs_spacer=6bp;gc_cont=0.552	1_54	57532	58923	+	Strict	850	867.1	Escherichia coli UhpT with mutation conferring resistance to fosfomycin	95.68	3003890	protein variant model	E350Q	n/a	phosphonic acid antibiotic	antibiotic target alteration	antibiotic-resistant UhpT	ATGCTGGCCTTCTTAAACCAGGTGCGCAAGCCGACCCTGGATCTGCCGCTCGATGTGCGGCGTAAAATGTGGTTCAAGCCGTTCATGCAGTCCTATCTGGTGGTTTTTATCGGCTACCTGACCATGTACCTGATCCGCAAAAACTTTAACATCGCGCAGAACGACATGATTTCTACCTACGGGTTGAGCATGACCGAGCTGGGGATGATTGGCCTGGGCTTCTCGATCACCTACGGCGTGGGGAAAACGCTGGTTTCCTACTACGCTGACGGTAAAAATACCAAGCAGTTTCTACCGTTTATGTTGATCCTCTCCGCTATCTGTATGCTCGGCTTCAGCGCCAGCATGGGCGCGGGGTCAACCAGTCTGTTTCTGATGATCGCTTTCTATGCCCTGAGC…	MLAFLNQVRKPTLDLPLDVRRKMWFKPFMQSYLVVFIGYLTMYLIRKNFNIAQNDMISTYGLSMTELGMIGLGFSITYGVGKTLVSYYADGKNTKQFLPFMLILSAICMLGFSASMGAGSTSLFLMIAFYALSGFFQSTGGSCSYSTITKWTPRRKRGTFLGFWNISHNLGGAGAAGVALFGANYLFDGHVIGMFIFPSIIALIVGFIGLRFGSDSPESYGLGKAEELFGEEISEEDKETEENEMTKWQIFVEYVLKNKVIWLLCFSNIFLYVVRIGIDQWSTVYAFQELKLSKEVAIQGFTLFEVGALVGTLLWGWLSDLANGRRALVACVALALIIATLGVYQHASNQYVYLASLFALGFLVFGPQLLIGVAAVGFVPKKAIGAADGIKGTFAYLIG…	MLAFLNQVRKPTLDLPLEVRRKMWFKPFMQSYLVVFIGYLTMYLIRKNFNIAQNDMISTYGLSMTQLGMIGLGFSITYGVGKTLVSYYADGKNTKQFLPFMLILSAICMLGFSASMGSGSVSLFLMIAFYALSGFFQSTGGSCSYSTITKWTPRRKRGTFLGFWNISHNLGGAGAAGVALFGANYLFDGHVIGMFIFPSIIALIVGFIGLRYGSDSPESYGLGKAEELFGEEISEEDKETESTDMTKWQIFVEYVLKNKVIWLLCFANIFLYVVRIGIDQWSTVYAFQELKLSKAVAIQGFTLFEAGALVGTLLWGWLSDLANGRRGLVACIALALIIATLGVYQHASNEYIYLASLFALGFLVFGPQLLIGVAAVGFVPKKAIGAADGIKGTFAYLIG…	100	gnl|BL_ORD_ID|2126|hsp_num:0	2373			0	1389	fosfomycin
	1_390 # 438579 # 439763 # 1 # ID=1_390;partial=00;start_type=GTG;rbs_motif=AGGA;rbs_spacer=8bp;gc_cont=0.542	1_390	438579	439763	+	Strict	700	786.9	Escherichia coli EF-Tu mutants conferring resistance to Pulvomycin	99.49	3003369	protein variant model	R234F	n/a	elfamycin antibiotic	antibiotic target alteration	elfamycin resistant EF-Tu	GTGTCTAAAGAAAAATTTGAACGTACAAAACCGCACGTTAACGTCGGCACCATCGGCCACGTTGACCACGGTAAAACTACCCTGACCGCTGCAATCACCACCGTACTGGCTAAAACCTACGGCGGTGCTGCTCGTGCATTCGACCAGATCGATAACGCGCCGGAAGAAAAAGCGCGTGGTATCACCATCAACACTTCTCACGTTGAATACGATACCCCGACCCGCCACTACGCACACGTAGACTGCCCGGGGCACGCCGACTATGTTAAAAACATGATCACCGGTGCTGCTCAGATGGACGGCGCGATTCTGGTTGTTGCTGCGACTGACGGCCCGATGCCGCAGACCCGTGAGCACATCCTGCTGGGTCGTCAGGTAGGCGTTCCGTACATCATCGTG…	MSKEKFERTKPHVNVGTIGHVDHGKTTLTAAITTVLAKTYGGAARAFDQIDNAPEEKARGITINTSHVEYDTPTRHYAHVDCPGHADYVKNMITGAAQMDGAILVVAATDGPMPQTREHILLGRQVGVPYIIVFLNKCDMVDDEELLELVEMEVRELLSQYDFPGDDTPIVRGSALKALEGDAEWEAKIIELAGFLDSYIPEPERAIDKPFLLPIEDVFSISGRGTVVTGRVERGIIKVGEEVEIVGIKETQKSTCTGVEMFRKLLDEGRAGENVGVLLRGIKREEIERGQVLAKPGTIKPHTKFESEVYILSKDEGGRHTPFFKGYRPQFYFRTTDVTGTIELPEGVEMVMPGDNIKMVVTLIHPIAMDDGLRFAIREGGRTVGAGVVAKVLG	MLSPEGESTIVRNIAVSKEKFERTKPHVNVGTIGHVDHGKTTLTAAITTVLAKTYGGAARAFDQIDNAPEEKARGITINTSHVEYDTPTRHYAHVDCPGHADYVKNMITGAAQMDGAILVVAATDGPMPQTREHILLGRQVGVPYIIVFLNKCDMVDDEELLELVEMEVRELLSQYDFPGDDTPIVRGSALKALEGDAEWEAKILELAGFLDSYIPEPERAIDKPFLLPIEDVFSISGRGTVVTGRVERGIIKVGEEVEIVGIKETQKSTCTGVEMFRKLLDEGRAGENVGVLLRGIKREEIERGQVLAKPGTIKPHTKFESEVYILSKDEGGRHTPFFKGYRPQFYFRTTDVTGTIELPEGVEMVMPGDNIKMVVTLIHPIAMDDGLRFAIREGGRTV…	96.33	gnl|BL_ORD_ID|1969|hsp_num:0	2158			45	1227	pulvomycin
	1_1454 # 1567453 # 1568811 # 1 # ID=1_1454;partial=00;start_type=ATG;rbs_motif=GGAG;rbs_spacer=8bp;gc_cont=0.548	1_1454	1567453	1568811	+	Strict	850	898.7	Escherichia coli GlpT with mutation conferring resistance to fosfomycin	96.9	3003889	protein variant model	E448K	n/a	phosphonic acid antibiotic	antibiotic target alteration	antibiotic-resistant GlpT	ATGTTGAGTATTTTTAAACCAGCGCCGCATAAAGCGCGCTTGCCAGCGGCGGAGATTGATCCGACCTATCGCCGATTACGCTGGCAGATTTTCCTGGGGATATTCTTTGGCTATGCCGCGTATTATCTGGTGCGCAAGAACTTTGCCCTCGCGATGCCCTACCTGGTAGAACAGGGTTTTTCACGCGGCGATCTGGGCTTTGCGTTGTCCGGGATTTCCATCGCTTATGGTTTTTCGAAATTTATAATGGGTTCGGTGTCCGATCGCTCGAATCCGCGCGTTTTTCTGCCGGCAGGGTTGATTCTGGCCGCAGCAGTCATGTTGTTTATGGGCTTTGTGCCGTGGGCGACATCCAGCATCGCCGTGATGTTTGTGCTGTTGTTCCTTTGCGGCTGGTTC…	MLSIFKPAPHKARLPAAEIDPTYRRLRWQIFLGIFFGYAAYYLVRKNFALAMPYLVEQGFSRGDLGFALSGISIAYGFSKFIMGSVSDRSNPRVFLPAGLILAAAVMLFMGFVPWATSSIAVMFVLLFLCGWFQGMGWPPCGRTMVHWWSQKERGGIVSVWNCAHNVGGGIPPLLFLLGMAWFNDWKAALYMPAFGAIVVALFAFAMMRDTPQSCGLPPIEEYKNDYPDDYNEKAEEELTAKQIFMQYVLPNKLLWYIAIANVFVYLLRYGILDWSPTYLKEVKHFALDKSSWAYFLYEYAGIPGTLLCGWMSDKVFRGNRGATGVFFMTLVTIATIVYWMNPAGNPNVDMACMIIIGFLIYGPVMLIGLHALELAPKKAAGTAAGFTGLFGYLGGSVA…	MLSIFKPAPHKARLPAAEIDPTYRRLRWQIFLGIFFGYAAYYLVRKNFALAMPYLVEQGFSRGDLGFALSGISIAYGFSKFIMGSVSDRSNPRVFLPAGLILAAAVMLFMGFVPWATSSIAVMFVLLFLCGWFQGMGWPPCGRTMVHWWSQKERGGIVSVWNCAHNVGGGIPPLLFLLGMAWFNDWHAALYMPAFCAILVALFAFAMMRDTPQSCGLPPIEEYKNDYPDDYNEKAEQELTAKQIFMQYVLPNKLLWYIAIANVFVYLLRYGILDWSPTYLKEVKHFALDKSSWAYFLYEYAGIPGTLLCGWMSDKVFRGNRGATGVFFMTLVTIATIVYWMNPAGNPTVDMICMIVIGFLIYGPVMLIGLHALELAPKKAAGTAAGFTGLFGYLGGSVA…	100	gnl|BL_ORD_ID|2127|hsp_num:0	2372			0	1356	fosfomycin
	1_1465 # 1581069 # 1583705 # 1 # ID=1_1465;partial=00;start_type=ATG;rbs_motif=GGA;rbs_spacer=10bp;gc_cont=0.559	1_1465	1581069	1583705	+	Strict	1500	1679.5	Salmonella enterica gyrA conferring resistance to fluoroquinolones	99.89	3003926	protein variant model	D87Y	D87Y:1545	fluoroquinolone antibiotic	antibiotic target alteration	fluoroquinolone resistant gyrA	ATGAGCGACCTTGCGAGAGAAATTACACCGGTCAACATTGAGGAAGAGCTGAAAAGCTCCTATCTGGATTATGCGATGTCGGTCATTGTTGGCCGTGCGCTGCCGGATGTCCGAGATGGCCTGAAGCCGGTACACCGTCGCGTACTTTACGCCATGAACGTATTGGGCAATGACTGGAACAAAGCCTATAAAAAATCTGCCCGTGTCGTTGGTGACGTAATCGGTAAATACCATCCCCACGGCGATTCCGCAGTGTATTACACCATCGTTCGTATGGCGCAGCCATTCTCGCTGCGTTACATGCTGGTGGATGGTCAGGGTAACTTCGGTTCTATTGACGGCGACTCCGCGGCGGCAATGCGTTATACGGAGATCCGTCTGGCGAAAATCGCCCACGAA…	MSDLAREITPVNIEEELKSSYLDYAMSVIVGRALPDVRDGLKPVHRRVLYAMNVLGNDWNKAYKKSARVVGDVIGKYHPHGDSAVYYTIVRMAQPFSLRYMLVDGQGNFGSIDGDSAAAMRYTEIRLAKIAHELMADLEKETVDFVDNYDGTEKIPDVMPTKIPNLLVNGSSGIAVGMATNIPPHNLTEVINGCLAYIDNEDISIEGLMEHIPGPDFPTAAIINGRRGIEEAYRTGRGKVYIRARAEVEADAKTGRETIIVHEIPYQVNKARLIEKIAELVKDKRVEGISALRDESDKDGMRIVIEVKRDAVGEVVLNNLYSQTQLQVSFGINMVALHHGQPKIMNLKDIISAFVRHRREVVTRRTIFELRKARDRAHILEALAIALANIDPIIELIRR…	MSDLAREITPVNIEEELKSSYLDYAMSVIVGRALPDVRDGLKPVHRRVLYAMNVLGNDWNKAYKKSARVVGDVIGKYHPHGDSAVYDTIVRMAQPFSLRYMLVDGQGNFGSIDGDSAAAMRYTEIRLAKIAHELMADLEKETVDFVDNYDGTEKIPDVMPTKIPNLLVNGSSGIAVGMATNIPPHNLTEVINGCLAYIDNEDISIEGLMEHIPGPDFPTAAIINGRRGIEEAYRTGRGKVYIRARAEVEADAKTGRETIIVHEIPYQVNKARLIEKIAELVKDKRVEGISALRDESDKDGMRIVIEVKRDAVGEVVLNNLYSQTQLQVSFGINMVALHHGQPKIMNLKDIISAFVRHRREVVTRRTIFELRKARDRAHILEALAIALANIDPIIELIRR…	100	gnl|BL_ORD_ID|2156|hsp_num:0	2403			0	2634	ciprofloxacin; nalidixic acid
	1_3606 # 3807987 # 3809753 # -1 # ID=1_3606;partial=00;start_type=ATG;rbs_motif=AGGA;rbs_spacer=12bp;gc_cont=0.547	1_3606	3807987	3809753	-	Strict	500	564.7	Haemophilus influenzae PBP3 conferring resistance to beta-lactam antibiotics	51.85	3004446	protein variant model	D350N, S357N	n/a	cephalosporin; cephamycin; penam	antibiotic target alteration	Penicillin-binding protein mutations conferring resistance to beta-lactam antibiotics	ATGAAAGCAGCGGCAAAAACGCAAAAATCGAAACGCCAGGAAGAACAGACCAACTTCATCAGTTGGCGTTTTGCGTTGCTGTGCGGCTGTATTTTACTGGCGCTGGTTTTTTTACTTGGACGCGCGGCGTGGCTACAGATTATCGCCCCGGATATGCTGGTGCGTCAGGGCGATATGCGTTCGCTGCGTGTTCAGGAAGTCTCCACCTCACGCGGTATGATTACCGACCGTTCCGGGCGTCCACTGGCGGTCAGCGTACCGGTTAAGGCGATCTGGGCCGACCCGAAAGAAGTTCATGACGCCGGCGGCATCAGCGTTGGCGATCGCTGGAAAGCGCTTTCTACTGCGCTCAATATTCCGCTCGATCAGCTCTCCGCCCGTATCAACGCCAACCCGAAA…	MKAAAKTQKSKRQEEQTNFISWRFALLCGCILLALVFLLGRAAWLQIIAPDMLVRQGDMRSLRVQEVSTSRGMITDRSGRPLAVSVPVKAIWADPKEVHDAGGISVGDRWKALSTALNIPLDQLSARINANPKGRFIYLARQVNPDMADYIKKLKLPGIHLREESRRYYPSGEVTAHLIGFTNVDSQGIEGVEKSFDKWLTGQPGERIVRKDRYGRVIEDISSTDSQAAHNLALSIDERLQALVYRELNNAVAFNKAESGSAVLVDVNTGEVLAMANSPSYNPNNLAGTPKDAMRNRTITDVFEPGSTVKPMVVMTALQRGIVNENTVLNTVPYRINGHEIKDVARYSELTLTGVLQKSSNVGVSKLALAMPSSALVDTYSRFGLGKATNLGLVGERSG…	MVKFNSSRKSGKSKKTIRKLTAPETVKQNKPQKVFEKCFMRGRYMLSTVLILLGLCALVARAAYVQSINADTLSNEADKRSLRKDEVLSVRGSILDRNGQLLSVSVPMSAIVADPKTMLKENSLADKERIAALAEELGMTENDLVKKIEKNSKSGYLYLARQVELSKANYIRRLKIKGIILETEHRRFYPRVEEAAHVVGYTDIDGNGIEGIEKSFNSLLVGKDGSRTVRKDKRGNIVAHISDEKKYDAQDVTLSIDEKLQSMVYREIKKAVSENNAESGTAVLVDVRTGEVLAMATAPSYNPNNRVGVKSELMRNRAITDTFEPGSTVKPFVVLTALQRGVVKRDEIIDTTSFKLSGKEIVDVAPRAQQTLDEILMNSSNRGVSRLALRMPPSALMET…	96.39	gnl|BL_ORD_ID|2491|hsp_num:0	2886			63	1758	ceftriaxone; ampicillin; cefaclor; cefotaxime; cefditoren; cefdinir
	1_4136 # 4403084 # 4404268 # -1 # ID=1_4136;partial=00;start_type=ATG;rbs_motif=GAGG;rbs_spacer=8bp;gc_cont=0.540	1_4136	4403084	4404268	-	Strict	700	786.9	Escherichia coli EF-Tu mutants conferring resistance to Pulvomycin	99.49	3003369	protein variant model	R234F	n/a	elfamycin antibiotic	antibiotic target alteration	elfamycin resistant EF-Tu	ATGTCTAAAGAAAAGTTTGAACGTACAAAACCGCACGTTAACGTCGGTACTATCGGCCACGTTGACCATGGTAAAACAACGCTGACCGCTGCCATTACTACCGTACTGGCTAAAACCTACGGCGGTGCCGCCCGCGCATTCGACCAGATCGATAACGCGCCGGAAGAAAAAGCGCGTGGTATCACCATCAACACTTCTCACGTTGAATACGATACCCCGACCCGCCACTACGCACACGTAGACTGCCCGGGGCACGCCGACTATGTTAAAAACATGATCACCGGTGCTGCTCAGATGGACGGCGCGATTCTGGTTGTTGCTGCGACTGACGGCCCGATGCCGCAGACCCGTGAGCACATCCTGCTGGGTCGTCAGGTAGGCGTTCCGTACATCATCGTG…	MSKEKFERTKPHVNVGTIGHVDHGKTTLTAAITTVLAKTYGGAARAFDQIDNAPEEKARGITINTSHVEYDTPTRHYAHVDCPGHADYVKNMITGAAQMDGAILVVAATDGPMPQTREHILLGRQVGVPYIIVFLNKCDMVDDEELLELVEMEVRELLSQYDFPGDDTPIVRGSALKALEGDAEWEAKIIELAGFLDSYIPEPERAIDKPFLLPIEDVFSISGRGTVVTGRVERGIIKVGEEVEIVGIKETQKSTCTGVEMFRKLLDEGRAGENVGVLLRGIKREEIERGQVLAKPGTIKPHTKFESEVYILSKDEGGRHTPFFKGYRPQFYFRTTDVTGTIELPEGVEMVMPGDNIKMVVTLIHPIAMDDGLRFAIREGGRTVGAGVVAKVLG	MLSPEGESTIVRNIAVSKEKFERTKPHVNVGTIGHVDHGKTTLTAAITTVLAKTYGGAARAFDQIDNAPEEKARGITINTSHVEYDTPTRHYAHVDCPGHADYVKNMITGAAQMDGAILVVAATDGPMPQTREHILLGRQVGVPYIIVFLNKCDMVDDEELLELVEMEVRELLSQYDFPGDDTPIVRGSALKALEGDAEWEAKILELAGFLDSYIPEPERAIDKPFLLPIEDVFSISGRGTVVTGRVERGIIKVGEEVEIVGIKETQKSTCTGVEMFRKLLDEGRAGENVGVLLRGIKREEIERGQVLAKPGTIKPHTKFESEVYILSKDEGGRHTPFFKGYRPQFYFRTTDVTGTIELPEGVEMVMPGDNIKMVVTLIHPIAMDDGLRFAIREGGRTV…	96.33	gnl|BL_ORD_ID|1969|hsp_num:0	2158			45	1227	pulvomycin
	1_1592 # 1721616 # 1722338 # -1 # ID=1_1592;partial=00;start_type=ATG;rbs_motif=GAG;rbs_spacer=6bp;gc_cont=0.537	1_1592	1721616	1722338	-	Strict	450	456.8	baeR	94.14	3000828	protein overexpression model	n/a	n/a	aminoglycoside antibiotic; aminocoumarin antibiotic	antibiotic efflux	resistance-nodulation-cell division (RND) antibiotic efflux pump	ATGACTGAATTACCCATTGATGAAAACACGCCGCGCATTTTGATTGTTGAAGATGAACCCAAGCTGGGTCAGCTGCTTATTGACTACTTACGCGCGGCGAGTTACGCCCCCACGCTCATCAATCACGGCGACAAGGTACTGCCGTATGTGCGTCAAACGCCGCCGGATCTGATTCTGCTGGATCTGATGCTGCCGGGTACCGATGGTCTGACGCTATGCCGGGAGATTCGCCGTTTTTCCGACATCCCCATTGTGATGGTCACAGCCAAAATTGAAGAGATCGACCGGCTGCTGGGGCTGGAAATCGGCGCCGATGATTATATCTGTAAGCCTTACAGCCCGCGCGAAGTCGTGGCCCGCGTGAAAACCATTTTGCGCCGCTGTAAACCGCAGCGCGAA…	MTELPIDENTPRILIVEDEPKLGQLLIDYLRAASYAPTLINHGDKVLPYVRQTPPDLILLDLMLPGTDGLTLCREIRRFSDIPIVMVTAKIEEIDRLLGLEIGADDYICKPYSPREVVARVKTILRRCKPQRELQQQDAESPLMIDESRFQASWCGKALDLTPAEFRLLKTLSLEPGKVFSREQLLNHLYDDYRVVTDRTIDSHIKNLRRKLESLDAEQSFIRAVYGVGYRWEADACRLV	MTELPIDENTPRILIVEDEPKLGQLLIDYLRAASYAPSLISHGDQVLPYVRQTPPDLILLDLMLPGTDGLTLCREIRRFSDVPIVMVTAKIEEIDRLLGLEIGADDYICKPYSPREVVARVKTILRRCKPQRELQVLDAESPLIVDESRFQASWRSKLLDLTPAEFRLLKTLSHEPGKVFSREQLLNHLYDDYRVVTDRTIDSHIKNLRRKLEALDAEQSFIRAVYGVGYRWEADACRIA	100	gnl|BL_ORD_ID|1382|hsp_num:0	1337			0	717	neomycin; amikacin; kanamycin A; tobramycin; novobiocin; gentamicin
	1_2193 # 2319687 # 2320121 # -1 # ID=1_2193;partial=00;start_type=TTG;rbs_motif=None;rbs_spacer=None;gc_cont=0.474	1_2193	2319687	2320121	-	Strict	210	273.5	Escherichia coli AcrAB-TolC with MarR mutations conferring resistance to ciprofloxacin and tetracycline	92.36	3003378	protein overexpression model	n/a	n/a	fluoroquinolone antibiotic; cephalosporin; glycylcycline; penam; tetracycline antibiotic; rifamycin antibiotic; phenicol antibiotic; disinfecting agents and antiseptics	antibiotic target alteration; antibiotic efflux	resistance-nodulation-cell division (RND) antibiotic efflux pump	TTGAAAAGCACCAGTGATCTGTTCAATGAAATCATTCCGCTGGGTCGCTTGATCTACATGGTAAATCAAAAAAAAGATCGCCTGTTAAATAACTATTTATCCCCGCTGGATATCACCGCAACACAGTTTAAAGTGCTTTGCTCGATACGCTGCGCGGGATGTATTACCCCGGTTGAACTTAAAAAAGTGCTGTCTGTCGATCTCGGCGCATTGACGCGAATGCTCGACCGCCTGCTGTGCAAAGGCTGGATCGAAAGACTGCCGAATCCTAATGACAAACGCGGCGTACTGGTGAAGCTAACGCCGGACGGCGCGGCAATTTGTGAGCAATGTCATCAACGACCAGGGCAAGACCTGCATCAGGAATTAACAAAAAACTTAACGGCGGACGAAGTGGCA…	LKSTSDLFNEIIPLGRLIYMVNQKKDRLLNNYLSPLDITATQFKVLCSIRCAGCITPVELKKVLSVDLGALTRMLDRLLCKGWIERLPNPNDKRGVLVKLTPDGAAICEQCHQRPGQDLHQELTKNLTADEVATLEYLLKKILP	MKSTSDLFNEIIPLGRLIHMVNQKKDRLLNEYLSPLDITAAQFKVLCSIRCAACITPVELKKVLSVDLGALTRMLDRLVCKGWVERLPNPNDKRGVLVKLTTGGAAICEQCHQLVGQDLHQELTKNLTADEVATLEYLLKKVLP	100	gnl|BL_ORD_ID|1983|hsp_num:0	431			0	432	tigecycline; ciprofloxacin; tetracycline; rifampin; chloramphenicol; ampicillin; cefalotin; triclosan
	1_4040 # 4274722 # 4275180 # -1 # ID=1_4040;partial=00;start_type=ATG;rbs_motif=AGG;rbs_spacer=11bp;gc_cont=0.549	1_4040	4274722	4275180	-	Strict	300	300.4	Escherichia coli soxR with mutation conferring antibiotic resistance	96.05	3003381	protein overexpression model	n/a	n/a	fluoroquinolone antibiotic; cephalosporin; glycylcycline; penam; tetracycline antibiotic; rifamycin antibiotic; phenicol antibiotic; disinfecting agents and antiseptics	antibiotic target alteration; antibiotic efflux	ATP-binding cassette (ABC) antibiotic efflux pump; major facilitator superfamily (MFS) antibiotic efflux pump; resistance-nodulation-cell division (RND) antibiotic efflux pump	ATGGAAAAAAAATCTCCCCGTTTAAAAGCCTTACTGACGCCGGGGGAAGTTGCGAAACGTAGCGGTGTTGCTGTGTCCGCCCTGCACTTCTATGAAAGCAAAGGGCTAATTACCAGTATCCGTAATAGCGGTAACCAACGGCGATACAAGCGTGACGTGTTGCGTTATGTCGCGATTATCAAGATCGCCCAGCGTATCGGCATCCCGCTGGCAACTATCGGCGACGCGTTTGGTATCTTGCCGGAAGGACATACGTTAAGCGCGAAAGAGTGGAAGCAGCTCTCCTCGCAGTGGCGCGAAGAGTTAGACCGACGTATTCATACGCTGGTGGCGTTGCGCGATGAGCTGGACGGTTGTATCGGCTGCGGCTGTTTATCGCGTAGCGACTGTCCGCTGCGA…	MEKKSPRLKALLTPGEVAKRSGVAVSALHFYESKGLITSIRNSGNQRRYKRDVLRYVAIIKIAQRIGIPLATIGDAFGILPEGHTLSAKEWKQLSSQWREELDRRIHTLVALRDELDGCIGCGCLSRSDCPLRNPGDRLGEHGTGARLLEDD	MEKKLPRIKALLTPGEVAKRSGVAVSALHFYESKGLITSIRNSGNQRRYKRDVLRYVAIIKIAQRIGIPLATIGEAFGVLPEGHTLSAKEWKQLSSQWREELDRRIHTLVALRDELDGCIGCGCLSRSDCPLRNPGDRLGEEGTGARLLEDEQN	98.7	gnl|BL_ORD_ID|1972|hsp_num:0	1005			0	456	tigecycline; ciprofloxacin; tetracycline; rifampin; chloramphenicol; ampicillin; nalidixic acid; norfloxacin; cefalotin; triclosan
	1_4041 # 4275267 # 4275590 # 1 # ID=1_4041;partial=00;start_type=ATG;rbs_motif=GAGG;rbs_spacer=7bp;gc_cont=0.515	1_4041	4275267	4275590	+	Strict	200	209.1	Escherichia coli soxS with mutation conferring antibiotic resistance	95.33	3003511	protein overexpression model	n/a	n/a	fluoroquinolone antibiotic; monobactam; carbapenem; cephalosporin; glycylcycline; cephamycin; penam; tetracycline antibiotic; rifamycin antibiotic; phenicol antibiotic; penem; disinfecting agents and antiseptics	antibiotic target alteration; antibiotic efflux; reduced permeability to antibiotic	ATP-binding cassette (ABC) antibiotic efflux pump; major facilitator superfamily (MFS) antibiotic efflux pump; resistance-nodulation-cell division (RND) antibiotic efflux pump; General Bacterial Porin with reduced permeability to beta-lactams	ATGTCGCATCAGCAGATAATTCAGACCCTTATCGAATGGATTGATGAACATATCGACCAACCGCTAAACATTGATGTGGTGGCAAAAAAATCGGGCTACTCCAAGTGGTATTTGCAGCGGATGTTTCGTACGGTAACGCATCAAACATTAGGCGAGTATATTCGCCAGCGCCGTCTCCTGTTGGCGGCCGTTGAGCTACGAACGACCGAGCGCCCGATTTTTGATATCGCGATGGACCTGGGCTATGTATCGCAGCAAACCTTCTCGCGTGTATTCCGCCGCGAGTTCGATCGCACTCCCAGCGATTACCGTCACCGCCTGTAG	MSHQQIIQTLIEWIDEHIDQPLNIDVVAKKSGYSKWYLQRMFRTVTHQTLGEYIRQRRLLLAAVELRTTERPIFDIAMDLGYVSQQTFSRVFRREFDRTPSDYRHRL	MSHQKIIQDLIAWIDEHIDQPLNIDVVAKKSGYSKWYLQRMFRTVTHQTLGDYIRQRRLLLAAVELRTTERPIFDIAMDLGYVSQQTFSRVFRRQFDRTPSDYRHRL	100	gnl|BL_ORD_ID|1974|hsp_num:0	2066			0	321	tigecycline; ciprofloxacin; tetracycline; rifampin; chloramphenicol; ampicillin; norfloxacin; cefalotin; triclosan; enrofloxacin
SA615	1_369 # 421789 # 422421 # -1 # ID=1_369;partial=00;start_type=ATG;rbs_motif=AGGA;rbs_spacer=9bp;gc_cont=0.506	1_369	421789	422421	-	Strict	400	418.3	CRP	99.05	3000518	protein homolog model	n/a	n/a	macrolide antibiotic; fluoroquinolone antibiotic; penam	antibiotic efflux	resistance-nodulation-cell division (RND) antibiotic efflux pump	ATGGTGCTTGGCAAACCGCAAACAGACCCGACTCTTGAATGGTTCTTGTCTCATTGCCACATTCATAAGTACCCGTCAAAGAGCACGCTGATTCACCAGGGTGAAAAAGCAGAAACGCTGTACTACATCGTTAAAGGCTCCGTGGCAGTGCTGATCAAAGATGAAGAAGGGAAAGAAATGATCCTTTCTTATCTGAATCAGGGTGATTTTATTGGTGAACTGGGCCTGTTTGAAGAAGGCCAGGAACGCAGCGCCTGGGTACGTGCGAAAACCGCATGTGAGGTCGCTGAAATTTCCTACAAAAAATTTCGCCAATTAATCCAGGTCAACCCGGATATTCTGATGCGCCTCTCTTCCCAGATGGCTCGTCGCTTACAAGTCACCTCTGAAAAAGTAGGT…	MVLGKPQTDPTLEWFLSHCHIHKYPSKSTLIHQGEKAETLYYIVKGSVAVLIKDEEGKEMILSYLNQGDFIGELGLFEEGQERSAWVRAKTACEVAEISYKKFRQLIQVNPDILMRLSSQMARRLQVTSEKVGNLAFLDVTGRIAQTLLNLAKQPDAMTHPDGMQIKITRQEIGQIVGCSRETVGRILKMLEDQNLISAHGKTIVVYGTR	MVLGKPQTDPTLEWFLSHCHIHKYPSKSKLIHQGEKAETLYYIVKGSVAVLIKDEEGKEMILSYLNQGDFIGELGLFEEGQERSAWVRAKTACEVAEISYKKFRQLIQVNPDILMRLSAQMARRLQVTSEKVGNLAFLDVTGRIAQTLLNLAKQPDAMTHPDGMQIKITRQEIGQIVGCSRETVGRILKMLEDQNLISAHGKTIVVYGTR	100	gnl|BL_ORD_ID|803|hsp_num:0	869			0	630	erythromycin; cloxacillin; oxacillin; norfloxacin
	1_621 # 660339 # 661160 # 1 # ID=1_621;partial=00;start_type=ATG;rbs_motif=AGG;rbs_spacer=9bp;gc_cont=0.536	1_621	660339	661160	+	Strict	500	511.5	bacA	97.07	3002986	protein homolog model	n/a	n/a	peptide antibiotic	antibiotic target alteration	undecaprenyl pyrophosphate related proteins	ATGAGCGATATGCACTCGCTGCTGATAGCGGCAATTTTGGGTGTGGTCGAAGGATTGACGGAGTTTTTGCCGGTATCCAGCACGGGCCATATGATTATTGTGGGTCATCTGCTGGGGTTTGAAGGCGATACGGCCAAGACATTCGAAGTGGTGATTCAACTTGGATCTATTCTGGCGGTCGTGGTGATGTTCTGGCGGCGGTTGTTTGGCCTCATCGGTATTCACTTTGGCCGCCCGCTACAGCGTGAAGGTGAAAGTAAAGGTCGATTAACGTTGATTCACATCCTGCTGGGCATGATTCCGGCGGTGGTGCTGGGGTTAGTCTTTCATGACACGATCAAGTCGCTATTTAACCCAATTAACGTGATGTACGCGCTGGTGGTAGGCGGTCTGTTGCTG…	MSDMHSLLIAAILGVVEGLTEFLPVSSTGHMIIVGHLLGFEGDTAKTFEVVIQLGSILAVVVMFWRRLFGLIGIHFGRPLQREGESKGRLTLIHILLGMIPAVVLGLVFHDTIKSLFNPINVMYALVVGGLLLIAAECLKPKEPRAPGLDDMTYRQAFMIGCFQCLALWPGFSRSGATISGGMLMGVSRYAASEFSFLLAVPMMMGATVLDLYKSWSFLTAADIPMFAVGFVTAFVVALIAIKTFLQLIKRISFIPFAIYRFVVAAAVYVVFF	MSDMHSLLIAAILGVVEGLTEFLPVSSTGHMIIVGHLLGFEGDTAKTFEVVIQLGSILAVVVMFWRRLFGLIGIHFGRPLQHEGESKGRLTLIHILLGMIPAVVLGLLFHDTIKSLFNPINVMYALVVGGLLLIAAECLKPKEPRAPGLDDMTYRQAFMIGCFQCLALWPGFSRSGATISGGMLMGVSRYAASEFSFLLAVPMMMGATALDLYKSWGFLTSGDIPMFAVGFITAFVVALIAIKTFLQLIKRISFIPFAIYRFIVAAAVYVVFF	100	gnl|BL_ORD_ID|1680|hsp_num:0	1820			0	819	bacitracin; bacitracin A; bacitracin B; bacitracin F
	1_1004 # 1063904 # 1064089 # 1 # ID=1_1004;partial=00;start_type=ATG;rbs_motif=AGGAG;rbs_spacer=6bp;gc_cont=0.511	1_1004	1063904	1064089	+	Strict	100	102.4	rsmA	85.25	3005069	protein homolog model	n/a	n/a	fluoroquinolone antibiotic; diaminopyrimidine antibiotic; phenicol antibiotic	antibiotic efflux	resistance-nodulation-cell division (RND) antibiotic efflux pump	ATGCTGATTCTGACTCGTCGAGTTGGTGAGACCCTCATGATTGGCGATGAGGTCACCGTGACAGTTTTAGGGGTGAAGGGCAACCAGGTGCGTATTGGCGTGAACGCCCCGAAAGAAGTTTCTGTCCATCGTGAAGAGATCTACCAGCGTATCCAGGCTGAAAAATCCCAGCAGTCCAGTTACTAA	MLILTRRVGETLMIGDEVTVTVLGVKGNQVRIGVNAPKEVSVHREEIYQRIQAEKSQQSSY	MLILTRRVGETLMVGDDVTVTVLGVKGNQVRIGVNAPKEVAVHREEIYQRIQKEKDQEPNH	100	gnl|BL_ORD_ID|2788|hsp_num:0	3807			0	183	trimethoprim; chloramphenicol
	1_1010 # 1070400 # 1071938 # -1 # ID=1_1010;partial=00;start_type=ATG;rbs_motif=GAGG;rbs_spacer=8bp;gc_cont=0.571	1_1010	1070400	1071938	-	Strict	900	966.5	emrB	95.9	3000074	protein homolog model	n/a	n/a	fluoroquinolone antibiotic	antibiotic efflux	major facilitator superfamily (MFS) antibiotic efflux pump	ATGCAACAGCAAAAACCGCTGGAGGGCGCGCAGCTCGTCATCATGACGATCGCGCTGTCGCTGGCGACATTCATGCAGGTGCTGGACTCCACCATTGCCAACGTGGCGATTCCGACCATCGCCGGGAACCTGGGTTCTTCCCTAAGCCAGGGGACATGGGTTATCACCTCTTTCGGGGTGGCGAACGCTATCTCGATTCCCTTAACCGGCTGGCTGGCGAAACGTTTTGGCGAAGTCAAACTGTTCATGTGGTCGACGGTCGCCTTTGCCGCGGCCTCCTGGGCCTGTGGCGTATCCAGCAGCCTGAATATGCTTATCTTCTTCCGCGTGGTGCAGGGCGTGGTCGCCGGGCCGCTGATTCCGCTCTCGCAAAGCCTGTTGCTGAATAACTATCCGCCT…	MQQQKPLEGAQLVIMTIALSLATFMQVLDSTIANVAIPTIAGNLGSSLSQGTWVITSFGVANAISIPLTGWLAKRFGEVKLFMWSTVAFAAASWACGVSSSLNMLIFFRVVQGVVAGPLIPLSQSLLLNNYPPAKRSIALALWSMTVIVAPICGPILGGYISDNYHWGWIFFINVPIGIAVVLMTLHTLRGRETHTERRRIDAVGLALLVIGIGSLQIMLDRGKELDWFSSQEIIILTVVAVIAISFLIVWELTDDHPIVDLSLFKSRNFTIGCLCISLAYMLYFGAIVLLPQLLQEVYGYTATWAGLASAPVGIIPVILSPIIGRFAHKLDMRRLVTFSFIMYAVCFYWRAWTFEPGMDFGASAWPQFIQGFAVACFFMPLTTITLSGLPPERLAAAS…	MQQQKPLEGAQLVIMTIALSLATFMQVLDSTIANVAIPTIAGNLGSSLSQGTWVITSFGVANAISIPLTGWLAKRVGEVKLFLWSTIAFAIASWACGVSSSLNMLIFFRVIQGIVAGPLIPLSQSLLLNNYPPAKRSIALALWSMTVIVAPICGPILGGYISDNYHWGWIFFINVPIGVAVVLMTLQTLRGRETRTERRRIDAVGLALLVIGIGSLQIMLDRGKELDWFSSQEIIILTVVAVVAICFLIVWELTDDNPIVDLSLFKSRNFTIGCLCISLAYMLYFGAIVLLPQLLQEVYGYTATWAGLASAPVGIIPVILSPIIGRFAHKLDMRRLVTFSFIMYAVCFYWRAYTFEPGMDFGASAWPQFIQGFAVACFFMPLTTITLSGLPPERLAAAS…	100	gnl|BL_ORD_ID|1705|hsp_num:0	1847			0	1536	nalidixic acid
	1_1012 # 1073254 # 1073784 # -1 # ID=1_1012;partial=00;start_type=ATG;rbs_motif=GAGG;rbs_spacer=10bp;gc_cont=0.482	1_1012	1073254	1073784	-	Strict	280	327	emrR	93.14	3000516	protein homolog model	n/a	n/a	fluoroquinolone antibiotic	antibiotic efflux	major facilitator superfamily (MFS) antibiotic efflux pump	ATGGATAGTTCGTTTACGCCCATTGAACAAATGCTAAAATTTCGCGCCAGCCGTCACGAAGACTTTCCTTATCAGGAAATTCTTTTGACTCGTCTTTGTATGCACATGCAAGGCAAGCTCCTGGAAAACCGCAATAAAATGCTGAAGGCTCAAGGGATTAACGAGACGTTGTTTATGGCGTTGATTACGCTGGAGTCTCAGGAAAACCACAGTATTCAGCCGTCTGAATTAAGCTGCGCGCTGGGTTCATCTCGCACCAATGCGACACGCATTGCAGATGAGCTGGAAAAACGCGGCTGGATTGAGCGTCGTGAGAGCGATAACGACCGCCGTTGCCTGCATCTGCAATTAACGGAGAAAGGCCAGGCATTTTTGCAAGAAGTGCTTCCGCCTCAGCAT…	MDSSFTPIEQMLKFRASRHEDFPYQEILLTRLCMHMQGKLLENRNKMLKAQGINETLFMALITLESQENHSIQPSELSCALGSSRTNATRIADELEKRGWIERRESDNDRRCLHLQLTEKGQAFLQEVLPPQHHCLHQLWSSLSTAEKDQLEHITRKLLTRLDQMEQEGTVLEALR	MDSSFTPIEQMLKFRASRHEDFPYQEILLTRLCMHMQSKLLENRNKMLKAQGINETLFMALITLESQENHSIQPSELSCALGSSRTNATRIADELEKRGWIERRESDNDRRCLHLQLTEKGHEFLREVLPPQHNCLHQLWSALSTTEKDQLEQITRKLLSRLDQMEQDGVVLEAMS	100	gnl|BL_ORD_ID|1225|hsp_num:0	1330			0	525	nalidixic acid
	1_1392 # 1514972 # 1516618 # -1 # ID=1_1392;partial=00;start_type=ATG;rbs_motif=GAG;rbs_spacer=6bp;gc_cont=0.541	1_1392	1514972	1516618	-	Strict	400	718.8	ArnT	62.61	3005053	protein homolog model	n/a	n/a	peptide antibiotic	antibiotic target alteration	pmr phosphoethanolamine transferase	ATGATGAAATCGATACGCTATTATCTGGCTTTCGCCGCATTTATCGCGCTCTACTATGTTATTCCTGTCAATAGCCGCCTGCTCTGGCAGCCGGATGAAACGCGCTATGCCGAAATAAGTCGGGAGATGCTGGCGTCTGGCGACTGGATCGTGCCGCATTTTCTGGGATTACGTTATTTTGAAAAACCGATAGCCGGTTACTGGATAAACAGTCTGGGTCAGTGGCTTTTTGGCGCTACCAATTTTGGCGTGCGGGCTGGCGCTATTTTAACGACATTGCTGGCCGCAGCGCTGGTGGCGTGGCTGACGTTCCGCTTATGGCGGGATAAACGTACCGCGTTGCTCGCCTCCGTTATCTTTCTCTCCCTCTTTGCCGTTTACAGTATCGGGACGTATGCG…	MMKSIRYYLAFAAFIALYYVIPVNSRLLWQPDETRYAEISREMLASGDWIVPHFLGLRYFEKPIAGYWINSLGQWLFGATNFGVRAGAILTTLLAAALVAWLTFRLWRDKRTALLASVIFLSLFAVYSIGTYAVLDPMIALWLTAGMCCFWQGMQATTRTGKIGMFLLLGATCGLGVLTKGFLALAVPVVSVLPWVIVQKRWKDFLLYGWLAVLSCFVVVLPWAIAIARREADFWHYFFWVEHIQRFAMSDAQHKAPFWYYLPVLLAGSLPWLGLLPGALKLGWRERNGAFYLLGWTIMPLLFFSIAKGKLPTYVLSCFAPIAILMARFVLHNVKEGVAALRVNGGINLVFGIIGIVAAFVVSSWGPLKSPVWTHIETYKVFCVWGVFTVWAFVGWYSL…	MKSIRYGVSLIALFALYYLLPLNFRLLWQPDETRYAEISREMLATGDWVVPHFLGLRYFEKPIAGYWINSIGQWLFGHNNFGVRFGSVFAITMTALLVAWLAWRIFRDKRVAILSLIIFLTAMLVYAIGTYAVLDPMITLWLALAMCSFWGAVQAHSRSGKILGYVLLGVACGMGVMTKGFLALAVPVVGVLPWVIARKRWREVLTYGWLAVIVCTLVVLPWGLAIAQREPDFWRYFFWVEHIQRFAEKDAQHKAPFWYYIPFLIAGSLPWLALLPGALKRGWLERDEARGALYLLGWVAMPFLFFSIAKGKLPTYILPCFAPLSILMARYALEAAKTGAKALRINGMINLGVGLLGLIAVLVVSPWGFMHKPVWTKIELYKCLLAAIAFAVWALMGWL…	99.46	gnl|BL_ORD_ID|2779|hsp_num:0	3795			0	1653	colistin A; colistin B
	1_1395 # 1519490 # 1520473 # -1 # ID=1_1395;partial=00;start_type=ATG;rbs_motif=AGGA;rbs_spacer=8bp;gc_cont=0.538	1_1395	1519490	1520473	-	Strict	550	554.7	PmrF	87.42	3003578	protein homolog model	n/a	n/a	peptide antibiotic	antibiotic target alteration	pmr phosphoethanolamine transferase	ATGTTTGACGCCGCCCCCATAAAAAAAGTCTCGGTGGTTATTCCTGTCTATAACGAACAGGAAAGCCTGCCGGAATTGATAAGACGCACCACCGCCGCCTGCGAGAGTCTGGGCAAAGCGTGGGAGATTTTATTGATAGATGATGGTAGCAGCGATAGCTCGGCGGAGCTGATGGTTAAGGCGTCCCAGGAAGCCGATAGCCATATCATCTCTATTTTACTCAACCGTAACTACGGTCAACATGCAGCGATCATGGCGGGGTTTAGCCATGTAAGCGGCGATCTCATCATTACGCTGGATGCCGATCTGCAAAACCCGCCGGAAGAGATCCCGCGCCTGGTGGCGAAAGCCGATGAAGGGTTCGATGTGGTAGGCACCGTGCGCCAGAACCGACAGGAC…	MFDAAPIKKVSVVIPVYNEQESLPELIRRTTAACESLGKAWEILLIDDGSSDSSAELMVKASQEADSHIISILLNRNYGQHAAIMAGFSHVSGDLIITLDADLQNPPEEIPRLVAKADEGFDVVGTVRQNRQDSLFRKSASKIINLLIQRTTGKAMGDYGCMLRAYRRPIIDTMLRCHERSTFIPILANIFARRATEIPVHHAEREFGDSKYSFMRLINLMYDLVTCLTTTPLRLLSLLGSVIAIGGFSLSVLLIVLRLALGPQWAAEGVFMLFAVLFTFIGAQFIGMGLLGEYIGRIYNDVRARPRYFVQQVIYPESTPFTEESHQ	MFEIHPVKKVSVVIPVYNEQESLPELIRRTTTACESLGKEYEILLIDDGSSDNSAHMLVEASQAENSHIVSILLNRNYGQHSAIMAGFSHVTGDLIITLDADLQNPPEEIPRLVAKADEGYDVVGTVRQNRQDSWFRKTASKMINRLIQRTTGKAMGDYGCMLRAYRRHIVDAMLHCHERSTFIPILANIFARRAIEIPVHHAEREFGESKYSFMRLINLMYDLVTCLTTTPLRMLSLLGSIIAIGGFSIAVLLVILRLTFGPQWAAEGVFMLFAVLFTFIGAQFIGMGLLGEYIGRIYTDVRARPRYFVQQVIRPSSKENE	101.55	gnl|BL_ORD_ID|1936|hsp_num:0	2014			0	954	polymyxin B
	1_1668 # 1820416 # 1821840 # 1 # ID=1_1668;partial=00;start_type=TTG;rbs_motif=AGG;rbs_spacer=6bp;gc_cont=0.538	1_1668	1820416	1821840	+	Strict	900	909.1	MdtK	99.16	3001327	protein homolog model	n/a	n/a	fluoroquinolone antibiotic	antibiotic efflux	multidrug and toxic compound extrusion (MATE) transporter	TTGAACGTCTCCACTGCCTTACGCCAGGCTGTCGTCCGTACGCCCTGGTATGCCAAACGCAAGAGCTACAAAGTGTTGTTCTGGCGTGAAATCACCCCACTTGCTATCCCTATTTTTCTGGAAAATACCTGTGTTTTGCTAATGGGCGTGCTCAGTACTTTTCTCGTCAGTTGGCTGGGCAAGGAAGCAATGGCGGGCGTGGGGCTTGCCGACAGTTTTAATATGGTAATTATGGCTTTTTTTGCGGCTATCGATCTTGGTACTACGGTGGTGGTTGCCTTTAGCCTGGGCAAGCGCGACAGGCGACGGGCAAGGGCGGCGGCGCGCCAGTCGCTGGTGATTATGACGCTATTTGCCGTTGTGCTGGCAGTGGTCATTCATTATTTCGGCAGTGAAATT…	MNVSTALRQAVVRTPWYAKRKSYKVLFWREITPLAIPIFLENTCVLLMGVLSTFLVSWLGKEAMAGVGLADSFNMVIMAFFAAIDLGTTVVVAFSLGKRDRRRARAAARQSLVIMTLFAVVLAVVIHYFGSEIINIVAGEATSEVKGLALTYLELTVLSYPAAAIALIGSGALRGAGNTKIPLMINGGMNILNIIISSILIYGAFSWQGLGFAGAGLGLTISRYIGAVAIIWVLMIGFNPALRIPLKSYLKPLNFGIIWEVMGIGIPASIESVLFNGGKLLTQMFVAGMGTNVIAGNFIAFSVAALINLPGNALGSASTIITGKRLGTGQIGQAERQLRHVFWMSTIVLTAIAWGTAPFAGLFASFYTQEQDVKEVVKVLLWLNAVFMPIWAAAWVLPS…	MNVSTALRQAVVRTPWYAKRKSYKVLFWREITPLAIPIFLENTCVLLMGVLSTFLVSWLGKEAMAGVGLADSFNMVIMAFFAAIDLGTTVVVAFSLGKRDRRRARAAARQSLVIMTLFAVVLAVVIHYFGSEIINIVAGEATPEVKGLALTYLELTVLSYPAAAIALIGSGALRGAGNTKIPLMINGGMNILNIIISSILIYGAFSWQGLGFAGAGLGLTISRYIGAVAIIWVLMIGFNPALRIPLKSYLKPLNFGIIWEVMGIGIPASIESVLFNGSKLLTQMFVAGMGTNVIAGNFIAFSVAALINLPGNALGSASTIITGKRLGTGQIGQAERQLRHVFWMSTIVLTAIAWGTAPFAGLFASFYTQEQDVKEVVKVLLWLNAAFMPIWAAAWVLPS…	100	gnl|BL_ORD_ID|1649|hsp_num:0	1752			0	1422	ciprofloxacin
	1_2111 # 2250561 # 2250923 # 1 # ID=1_2111;partial=00;start_type=ATG;rbs_motif=AGGAG;rbs_spacer=7bp;gc_cont=0.446	1_2111	2250561	2250923	+	Strict	150	169.1	Klebsiella pneumoniae KpnE	76.67	3004580	protein homolog model	n/a	n/a	macrolide antibiotic; aminoglycoside antibiotic; cephalosporin; tetracycline antibiotic; peptide antibiotic; rifamycin antibiotic; disinfecting agents and antiseptics	antibiotic efflux	small multidrug resistance (SMR) antibiotic efflux pump	ATGTTTTACTGGATTTTATTAGCTCTGGCTATCGCGACTGAAATTACCGGCACGCTCTCAATGAAATGGGCTAGCGTGGGTAATGGCAATGCGGGTTTTATTTTAATGCTGGTGATGATCACGCTGTCATATATATTTCTTTCTTTTGCGGTAAAAAAGATTGCCCTGGGTGTAGCGTATGCCTTATGGGAAGGGATCGGCATTTTATTTATTACCATTTTTAGCGTGCTGCTATTTGATGAAGCATTATCAACCATGAAGATTGCCGGCTTGCTGACGCTGGTCGCCGGCATAGTATTGATCAAATCAGGGACGCGTAAACCCGGCAAACCGGTGAAGGAGGCGACTCGTGCAACAATTTGA	MFYWILLALAIATEITGTLSMKWASVGNGNAGFILMLVMITLSYIFLSFAVKKIALGVAYALWEGIGILFITIFSVLLFDEALSTMKIAGLLTLVAGIVLIKSGTRKPGKPVKEATRATI	MFYWILLALAIIAEITGTLSMKWASVSGGHTGFILMLAMIALSYIFLAFAVKKIALGVAYALWEGIGILLITLFSVLLFDESLSLLKIAGLTTLVIGIVLIKSGTQKKASSQQEVAHAAV	100	gnl|BL_ORD_ID|2715|hsp_num:0	3283			0	360	erythromycin; streptomycin; tetracycline; cefepime; ceftriaxone; rifampin; colistin A; colistin B; triclosan; benzalkonium chloride; chlorhexidine
	1_2112 # 2250910 # 2251239 # 1 # ID=1_2112;partial=00;start_type=GTG;rbs_motif=AGGAG;rbs_spacer=7bp;gc_cont=0.558	1_2112	2250910	2251239	+	Strict	150	189.1	Klebsiella pneumoniae KpnF	87.16	3004583	protein homolog model	n/a	n/a	macrolide antibiotic; aminoglycoside antibiotic; cephalosporin; tetracycline antibiotic; peptide antibiotic; rifamycin antibiotic; disinfecting agents and antiseptics	antibiotic efflux	small multidrug resistance (SMR) antibiotic efflux pump	GTGCAACAATTTGAATGGATACACGGCGCCTGGCTTGGGCTGGCAATAATGCTGGAAATCGCGGCTAACGTACTGTTGAAATTTTCGGACGGCTTTCGCCGTAAATGCTATGGCATCTTATCGCTTGCCGCTGTTCTGGCCGCCTTCAGCGCGCTTTCCCAGGCGGTAAAAGGGATAGACCTGTCGGTGGCGTATGCGTTATGGGGCGGTTTTGGTATTGCCGCCACGCTGGCGGCGGGCTGGGTGCTCTTCGGCCAGCGCTTAAACCCCAAAGGCTGGGTTGGCGTGATATTGCTGCTCGCCGGAATGGTCATGATCAAATTTGCCTGA	MQQFEWIHGAWLGLAIMLEIAANVLLKFSDGFRRKCYGILSLAAVLAAFSALSQAVKGIDLSVAYALWGGFGIAATLAAGWVLFGQRLNPKGWVGVILLLAGMVMIKFA	MQQFEWIHAAWLAIAIVLEIIANVFLKFSDGFRRKIYGILSLAAVLGAFSALSQAVKGIDLSVAYALWGGFGIAATIAAGWVLFGQRLNNKGWAGVILLVAGMVLIKLA	100	gnl|BL_ORD_ID|2717|hsp_num:0	3286			0	327	erythromycin; streptomycin; tetracycline; cefepime; ceftriaxone; rifampin; colistin A; colistin B; triclosan; benzalkonium chloride; chlorhexidine
	1_2149 # 2287420 # 2287803 # -1 # ID=1_2149;partial=00;start_type=ATG;rbs_motif=GAGG;rbs_spacer=7bp;gc_cont=0.471	1_2149	2287420	2287803	-	Strict	230	247.3	marA	95.24	3000263	protein homolog model	n/a	n/a	fluoroquinolone antibiotic; monobactam; carbapenem; cephalosporin; glycylcycline; cephamycin; penam; tetracycline antibiotic; rifamycin antibiotic; phenicol antibiotic; penem; disinfecting agents and antiseptics	antibiotic efflux; reduced permeability to antibiotic	resistance-nodulation-cell division (RND) antibiotic efflux pump; General Bacterial Porin with reduced permeability to beta-lactams	ATGTCCAGACGCAACACTGACGCTATTACTATTCATAGCATTTTGGACTGGATCGAGGATAACCTGGAGTCGCCGCTCTCACTGGAAAAAGTGTCTGAGCGTTCAGGATATTCCAAATGGCACCTGCAACGGATGTTTAAAAAAGAGACCGGTCATTCATTAGGCCAATACATCCGCAGCCGTAAAATGACGGAAATCGCGCAAAAATTAAAAGAGAGCAACGAGCCCATTCTCTATCTGGCGGAACGCTATGGCTTTGAGTCACAGCAAACATTGACCCGGACGTTCAAAAACTACTTTGATGTGCCGCCACACAAATACCGGATCACCAATATGCATGGCGAATCACGGTATATGCTGCCGCTGAACCATGGCAACTACTAG	MSRRNTDAITIHSILDWIEDNLESPLSLEKVSERSGYSKWHLQRMFKKETGHSLGQYIRSRKMTEIAQKLKESNEPILYLAERYGFESQQTLTRTFKNYFDVPPHKYRITNMHGESRYMLPLNHGNY	MSRRNTDAITIHSILDWIEDNLESPLSLEKVSERSGYSKWHLQRMFKKETGHSLGQYIRSRKMTEIAQKLKESNEPILYLAERYGFESQQTLTRTFKNYFDVPPHKYRMTNMQGESRFLHPLNHYNS	100	gnl|BL_ORD_ID|1771|hsp_num:0	1922			0	378	tigecycline; tetracycline; rifampin; chloramphenicol; ampicillin; cefalotin; triclosan
	1_2244 # 2393159 # 2393596 # 1 # ID=1_2244;partial=00;start_type=ATG;rbs_motif=AGGAG;rbs_spacer=7bp;gc_cont=0.523	1_2244	2393159	2393596	+	Strict	275	298.1	AAC(6')-Iy	97.24	3002569	protein homolog model	n/a	n/a	aminoglycoside antibiotic	antibiotic inactivation	AAC(6')	ATGGACATCAGGCAAATGAACAAAACCCATCTGGAGCACTGGCGCGGATTGCGAAAACAGCTCTGGCCCGGTCACCCGGATGACGCCCATCTGGCAGACGGCGAAGAAATCCTGCAAGCCGATCATTTGGCATCATTTGTTGCGATGGCAGACGGGGTGGCGATTGGCTTTGCGGATGCCTCAATCCGCCACGATTATGTCAATGGCTGTGACAGTTCGCCCGTGGCTTTTCTTGAAGGTATTTTTGTTCTCCCCTCGTTCCGTCAACGCGGCGTAGCGAAACAATTGATTGCAGCGGTGCAACGATGGGGAACGAATAAAGGGTGTCGGGAAATGGCCTCTGATACCACGCCGGAAAATACAATTTCCCAGAAAGTTCACCTGGCATTAGGATTTGAG…	MDIRQMNKTHLEHWRGLRKQLWPGHPDDAHLADGEEILQADHLASFVAMADGVAIGFADASIRHDYVNGCDSSPVAFLEGIFVLPSFRQRGVAKQLIAAVQRWGTNKGCREMASDTTPENTISQKVHLALGFEETERVIFYRKRC	MDIRQMNKTHLEHWRGLRKQLWPGHPDDAHLADGEEILQADHLASFIAMADGVAIGFADASIRHDYVNGCDSSPVVFLEGIFVLPSFRQRGVAKQLIAAVQRWGTNKGCREMASDTSPENTISQKVHQALGFEETERVIFYRKRC	100	gnl|BL_ORD_ID|330|hsp_num:0	360			0	435	dibekacin; amikacin; sisomicin; netilmicin; tobramycin; 2'-N-ethylnetilmicin; 5-episisomicin
	1_2403 # 2550216 # 2550629 # 1 # ID=1_2403;partial=00;start_type=ATG;rbs_motif=GAG;rbs_spacer=9bp;gc_cont=0.454	1_2403	2550216	2550629	+	Strict	240	245.7	H-NS	94.89	3000676	protein homolog model	n/a	n/a	macrolide antibiotic; fluoroquinolone antibiotic; cephalosporin; cephamycin; penam; tetracycline antibiotic	antibiotic efflux	major facilitator superfamily (MFS) antibiotic efflux pump; resistance-nodulation-cell division (RND) antibiotic efflux pump	ATGAGCGAAGCACTTAAAATTCTGAACAACATCCGTACTCTTCGTGCGCAGGCAAGAGAATGTACTCTGGAAACGCTTGAAGAAATGCTGGAAAAATTAGAAGTTGTCGTTAATGAGCGTCGTGAAGAAGAAAGCGCTGCTGCTGCTGAAGTGGAAGAACGCACTCGTAAACTGCAACAGTATCGTGAAATGTTAATTGCCGACGGCATTGACCCGAATGAACTGCTGAATAGCATGGCTGCCGCTAAATCCGGTACCAAAGCTAAACGCGCAGCTCGTCCGGCTAAATATAGCTATGTTGACGAAAACGGTGAAACTAAAACCTGGACTGGCCAGGGTCGTACACCGGCTGTAATCAAAAAAGCAATGGAAGAACAAGGTAAGCAACTGGAAGATTTC…	MSEALKILNNIRTLRAQARECTLETLEEMLEKLEVVVNERREEESAAAAEVEERTRKLQQYREMLIADGIDPNELLNSMAAAKSGTKAKRAARPAKYSYVDENGETKTWTGQGRTPAVIKKAMEEQGKQLEDFLIKE	MSEALKILNNIRTLRAQARECTLETLEEMLEKLEVVVNERREEESAAAAEVEERTRKLQQYREMLIADGIDPNELLNSLAAVKSGTKAKRAQRPAKYSYVDENGETKTWTGQGRTPAVIKKAMDEQGKSLDDFLIKQ	100	gnl|BL_ORD_ID|1144|hsp_num:0	1248			0	411	erythromycin; cloxacillin; ciprofloxacin; tetracycline; oxacillin; norfloxacin
	1_2621 # 2764208 # 2764930 # -1 # ID=1_2621;partial=00;start_type=ATG;rbs_motif=None;rbs_spacer=None;gc_cont=0.492	1_2621	2764208	2764930	-	Strict	470	488.4	sdiA	99.58	3000826	protein homolog model	n/a	n/a	fluoroquinolone antibiotic; cephalosporin; glycylcycline; penam; tetracycline antibiotic; rifamycin antibiotic; phenicol antibiotic; disinfecting agents and antiseptics	antibiotic efflux	resistance-nodulation-cell division (RND) antibiotic efflux pump	ATGCAGGAAAATGATTTCTTCACCTGGCGACGCGCAATGTTGTTACGCTTTCAGGAGATGGCGGCAGCAGAGGATGTTTATACTGAATTGCAATATCAGACACAGCGGCTGGAATTTGATTATTATGCCCTGTGTGTTCGTCATCCCGTCCCCTTTACCCGGCCTAAAATATCGCTTCGTACCACTTATCCTCCGGCGTGGGTAACGCATTACCAGTCCGAAAACTATTTTGCGATCGATCCGGTATTAAAGCCGGAAAATTTCAGGCAGGGTCATTTACATTGGGATGACGTGCTATTTCATGAAGCGCAGGCGATGTGGGATGCCGCCCAGCGTTTCGGATTACGCAGAGGCGTAACCCAGTGTGTGATGTTGCCGAACCGGGCGCTGGGCTTTTTA…	MQENDFFTWRRAMLLRFQEMAAAEDVYTELQYQTQRLEFDYYALCVRHPVPFTRPKISLRTTYPPAWVTHYQSENYFAIDPVLKPENFRQGHLHWDDVLFHEAQAMWDAAQRFGLRRGVTQCVMLPNRALGFLSFSRSSLRCSSFTYDEVELRLQLLARESLSALTRFEDDMVMAPEMRFSKREKEILKWTAEGKTSSEIAIILSISENTVNFHQKNMQKKFNAPNKTQIACYAAATGLI	MQENDFFTWRRAMLLRFQEMAAAEDVYTELQYQTQRLEFDYYALCVRHPVPFTRPKISLRTTYPPAWVTHYQSENYFAIDPVLKPENFRQGHLHWDDVLFHEAKAMWDAAQRFGLRRGVTQCVMLPNRALGFLSFSRSSLRCSSFTYDEVELRLQLLARESLSALTRFEDDMVMAPEMRFSKREKEILKWTAEGKTSSEIAIILSISENTVNFHQKNMQKKFNAPNKTQIACYAAATGLI	100	gnl|BL_ORD_ID|208|hsp_num:0	228			0	720	tigecycline; tetracycline; rifampin; chloramphenicol; ampicillin; cefalotin; triclosan
	1_2791 # 2932277 # 2934025 # -1 # ID=1_2791;partial=00;start_type=ATG;rbs_motif=None;rbs_spacer=None;gc_cont=0.516	1_2791	2932277	2934025	-	Strict	1000	1067.4	msbA	96.39	3003950	protein homolog model	n/a	n/a	nitroimidazole antibiotic	antibiotic efflux	ATP-binding cassette (ABC) antibiotic efflux pump	ATGCATAACGATAAAGATCTCTCTACGTGGCAGACCTTCCGCCGACTGTGGCCAACCATAGCGCCTTTTAAAGCAGGTCTGATCGTGGCGGGCATAGCGTTAATTCTCAACGCAGCCAGCGATACCTTCATGCTATCGCTCCTCAAGCCATTACTGGATGATGGTTTCGGTAAAACGGATCGCTCAGTGTTGCTGTGGATGCCGCTGGTGGTTATTGGGCTGATGATATTACGAGGCATCACTAGCTATATCTCCAGCTACTGTATTTCATGGGTGTCAGGCAAGGTGGTAATGACCATGCGCCGTCGCCTGTTTGGCCATATGATGGGAATGCCCGTCGCCTTCTTTGATAAACAGTCTACCGGTACGCTGCTGTCGCGTATTACTTACGATTCAGAA…	MHNDKDLSTWQTFRRLWPTIAPFKAGLIVAGIALILNAASDTFMLSLLKPLLDDGFGKTDRSVLLWMPLVVIGLMILRGITSYISSYCISWVSGKVVMTMRRRLFGHMMGMPVAFFDKQSTGTLLSRITYDSEQVASSSSGALITVVREGASIIGLFIMMFYYSWQLSIILVVLAPIVSIAIRVVSKRFRSISKNMQNTMGQVTTSAEQMLKGHKEVLIFGGQEVETKRFDKVSNKMRLQGMKMVSASSISDPIIQLIASLALAFVLYAASFPSVMDSLTAGTITVVFSSMIALMRPLKSLTNVNAQFQRGMAACQTLFAILDSEQEKDEGKRVIDRATGDLEFRNVTFTYPGREVPALRNINLKIPAGKTVALVGRSGSGKSTIASLITRFYDIDEGH…	MHNDKDLSTWQTFRRLWPTIAPFKAGLIVAGVALILNAASDTFMLSLLKPLLDDGFGKTDRSVLVWMPLVVIGLMILRGITSYVSSYCISWVSGKVVMTMRRRLFGHMMGMPVSFFDKQSTGTLLSRITYDSEQVASSSSGALITVVREGASIIGLFIMMFYYSWQLSIILIVLAPIVSIAIRVVSKRFRNISKNMQNTMGQVTTSAEQMLKGHKEVLIFGGQEVETKRFDKVSNRMRLQGMKMVSASSISDPIIQLIASLALAFVLYAASFPSVMDSLTAGTITVVFSSMIALMRPLKSLTNVNAQFQRGMAACQTLFTILDSEQEKDEGKRVIERATGDVEFRNVTFTYPGRDVPALRNINLKIPAGKTVALVGRSGSGKSTIASLITRFYDIDEGE…	100	gnl|BL_ORD_ID|2183|hsp_num:0	2423			0	1746	metronidazole
	1_2866 # 3020996 # 3022228 # -1 # ID=1_2866;partial=00;start_type=ATG;rbs_motif=GAG;rbs_spacer=5bp;gc_cont=0.554	1_2866	3020996	3022228	-	Strict	700	700.7	Escherichia coli mdfA	87.71	3001328	protein homolog model	n/a	n/a	tetracycline antibiotic; disinfecting agents and antiseptics	antibiotic efflux	major facilitator superfamily (MFS) antibiotic efflux pump	ATGCAGAATCGTTTACAATCAGGCGGCAGGCTGGGACGTCAGGCGCTGCTTTTTCCTCTCTGTCTGGTGCTGTACGAATTTTCTACTTATATTGGCAACGACATGATCCAGCCGGGTATGCTGGCGGTGGTTGAGCAGTATCAGGCGTGCCTGGACTGGGTTCCGACGTCCATGACCGCTTATCTGGCGGGCGGTATGTTCTTACAGTGGCTGCTTGGCCCGTTGTCTGACCGGATTGGCCGTCGTCCCGTGATGCTGGCGGGCGTCGTGTGGTTTATTGTCACCTGCCTGGCGACGTTACTGGCGAAAAACATCGAACAATTTACCTTCCTGCGTTTTTTGCAAGGGATTAGCCTGTGTTTTATCGGCGCTGTAGGGTATGCCGCGATTCAGGAGTCC…	MQNRLQSGGRLGRQALLFPLCLVLYEFSTYIGNDMIQPGMLAVVEQYQACLDWVPTSMTAYLAGGMFLQWLLGPLSDRIGRRPVMLAGVVWFIVTCLATLLAKNIEQFTFLRFLQGISLCFIGAVGYAAIQESFEEAVCIKITALMANVALIAPLLGPLVGAAWVHVLPWEGMFILFAALAAIAFFGLQRAMPETATRRGETLSFKALGRDYRLVIKNRRFVAGALALGFVSLPLLAWIAQSPIIIISGEQLSSYEYGLLQVPVFGALIAGNLVLARLTSRRTVRSLIVMGGWPIVAGLIIAAAATVVSSHAYLWMTAGLSVYAFGIGLANAGLVRLTLFSSDMSKGTVSAAMGMLQMLIFTVGIEVSKHAWLSGGNGLFSLFNLANGILWLLLMLVFL…	MQNKLASGARLGRQALLFPLCLVLYEFSTYIGNDMRQPGMLENVEQYQAGIEWVPTSMNAYLAGGMFIQWLLGPLSDRIGRRPVMLAGVVWFIVTCLAILLAQNIEQFTLLRFLHGISLCFIGAVGYDAIQESFEEAVCIKITALMANVALIAPLLGPLVGASWIHVLPWEGMFVLFAALAAISFFGLQRAMPETATRIGEKLSLKELGRDYKLVLKNGRFVAGALALGFLSLPLLAWIAQSPIIIITGEQLSSYEYGLLQVPIFGALIAGNLLLARLTSRRTVRSLIIMGGWPIMIGLLVAAAATVISSHAYLWMTAGLSIYAFGIGLANAGLVRLTLFASVMSKGTVSAAMGMLQMLIFTVGIEISKHAWLNGGNGLFNLFNLVNGILLLSLMVIFL…	100	gnl|BL_ORD_ID|2417|hsp_num:0	37			0	1221	tetracycline; benzalkonium chloride
	1_3016 # 3180528 # 3181205 # 1 # ID=1_3016;partial=00;start_type=GTG;rbs_motif=GAGGA;rbs_spacer=3bp;gc_cont=0.563	1_3016	3180528	3181205	+	Strict	400	422.9	kdpE	91.96	3003841	protein homolog model	n/a	n/a	aminoglycoside antibiotic	antibiotic efflux	kdpDE	GTGACAAACGTTCTGATTGTTGAAGATGAACAGGCCATCCGCCGCTTTCTGCGCGCCGCGCTGGAAGGCGACGGCCTGCGCGTGTATGAAGCTGAAACATTACAACGTGGTTTACTGGAAGCCGCCACGCGAAAGCCCGATCTGATTATTCTCGATCTCGGCCTGCCGGACGGCGACGGAATCGATTTCATTCGCGACCTGCGTCAGTGGAGCGCAATACCGGTGATTGTCCTTTCCGCCCGCAGCGAAGAAAGCGATAAGATTGCCGCGCTTGACGCCGGAGCTGATGATTACCTGAGCAAGCCATTCGGCATTGGCGAGTTGCAGGCGCGTTTGCGTGTCGCGCTGCGACGGCACGCCGCCAGCCCTAGCGCCGATCCGATCGTCCGTTTTTCCGGC…	MTNVLIVEDEQAIRRFLRAALEGDGLRVYEAETLQRGLLEAATRKPDLIILDLGLPDGDGIDFIRDLRQWSAIPVIVLSARSEESDKIAALDAGADDYLSKPFGIGELQARLRVALRRHAASPSADPIVRFSGVTVDLAARLIHRGDEEIHLTPIEFRLLAVLLNNTGKVLTQRQLLNQVWGPNAVEHSHYLRIYMGHLRQKLEQDPTRPRHFITETGIGYRFMP	MTNVLIVEDEQAIRRFLRTALEGDGMRVFEAETLQRGLLEAATRKPDLIILDLGLPDGDGIEFIRDLRQWSAVPVIVLSARSEESDKIAALDAGADDYLSKPFGIGELQARLRVALRRHSATTAPDPLVKFSDVTVDLAARVIHRGEEEVHLTPIEFRLLAVLLNNAGKVLTQRQLLNQVWGPNAVEHSHYLRIYMGHLRQKLEQDPARPRHFITETGIGYRFML	100	gnl|BL_ORD_ID|2101|hsp_num:0	2331			0	672	kanamycin A
	1_3232 # 3406630 # 3407823 # 1 # ID=1_3232;partial=00;start_type=ATG;rbs_motif=GAGG;rbs_spacer=7bp;gc_cont=0.554	1_3232	3406630	3407823	+	Strict	670	691	Escherichia coli acrA	91.69	3004043	protein homolog model	n/a	n/a	fluoroquinolone antibiotic; cephalosporin; glycylcycline; penam; tetracycline antibiotic; rifamycin antibiotic; phenicol antibiotic; disinfecting agents and antiseptics	antibiotic efflux	resistance-nodulation-cell division (RND) antibiotic efflux pump	ATGAACAAAAACAGAGGGTTAACGCCTCTGGCGGTCGTTCTGATGCTCTCAGGCAGCTTAGCGCTAACAGGATGTGACGACAAACAGGACCAGCAAGGCGGCCAGCAGATGCCAGAAGTTGGAGTTGTCACACTAAAAACGGAACCACTGCAAATCACAACTGAACTTCCGGGTCGTACCGTTGCTTACCGTATCGCCGAAGTTCGCCCACAGGTAAGCGGCATTATCCTGAAGCGTAATTTCGTTGAGGGAAGTGATATCGAAGCGGGAGTCTCTCTCTATCAGATTGATCCTGCGACCTACCAGGCGACTTACGACAGCGCTAAGGGCGATCTGGCAAAAGCGCAGGCCGCCGCGAATATCGCTGAACTGACGGTGAAGCGTTATCAAAAGCTGCTG…	MNKNRGLTPLAVVLMLSGSLALTGCDDKQDQQGGQQMPEVGVVTLKTEPLQITTELPGRTVAYRIAEVRPQVSGIILKRNFVEGSDIEAGVSLYQIDPATYQATYDSAKGDLAKAQAAANIAELTVKRYQKLLGTQYISKQEYDQALADAQQATAAVVAAKAAVETARINLAYTKVTSPISGRIGKSSVTEGALVQNGQASALATVQQLDPIYVDVTQSSNDFLRLKQELANGSLKQENGKAKVDLVTSDGIKFPQSGTLEFSDVTVDQTTGSITLRAIFPNPDHTLLPGMFVRARLQEGTKPTALLVPQQGVTRTPRGDATVLVVGADNKVETRQIVASQAIGDKWLVTDGLKAGDRVVVSGLQKVRPGAQVKVQEITADNKQQAASGDQPAQPRS	MNKNRGFTPLAVVLMLSGSLALTGCDDKQAQQGGQQMPAVGVVTVKTEPLQITTELPGRTSAYRIAEVRPQVSGIILKRNFKEGSDIEAGVSLYQIDPATYQATYDSAKGDLAKAQAAANIAQLTVNRYQKLLGTQYISKQEYDQALADAQQANAAVTAAKAAVETARINLAYTKVTSPISGRIGKSNVTEGALVQNGQATALATVQQLDPIYVDVTQSSNDFLRLKQELANGTLKQENGKAKVSLITSDGIKFPQDGTLEFSDVTVDQTTGSITLRAIFPNPDHTLLPGMFVRARLEEGLNPNAILVPQQGVTRTPRGDATVLVVGADDKVETRPIVASQAIGDKWLVTEGLKAGDRVVISGLQKVRPGVQVKAQEVTADNNQQAASGAQPEQSKS	100	gnl|BL_ORD_ID|2319|hsp_num:0	2661			0	1191	tigecycline; tetracycline; rifampin; chloramphenicol; ampicillin; cefalotin; triclosan
	1_3233 # 3407846 # 3410995 # 1 # ID=1_3233;partial=00;start_type=ATG;rbs_motif=AGGAG;rbs_spacer=10bp;gc_cont=0.543	1_3233	3407846	3410995	+	Strict	1900	1902.5	acrB	94.66	3000216	protein homolog model	n/a	n/a	fluoroquinolone antibiotic; cephalosporin; glycylcycline; penam; tetracycline antibiotic; rifamycin antibiotic; phenicol antibiotic; disinfecting agents and antiseptics	antibiotic efflux	resistance-nodulation-cell division (RND) antibiotic efflux pump	ATGCCTAATTTCTTTATCGATCGCCCTATATTTGCGTGGGTGATCGCCATCATCATCATGTTGGCAGGGGGGCTCGCGATCCTCAAATTGCCGGTAGCGCAATATCCGACGATTGCGCCACCAGCAGTGACGATCTCCGCAACCTACCCTGGCGCTGATGCGAAAACGGTACAGGATACCGTCACGCAGGTTATCGAACAGAATATGAACGGTATCGATAACCTGATGTATATGTCCTCCAACAGTGACTCCACGGGGACCGTGCAGATCACGCTGACCTTTGAATCCGGCACCGATGCGGATATCGCGCAGGTTCAGGTTCAGAACAAGTTGCAACTGGCAATGCCTTTACTTCCCCAGGAAGTACAGCAACAGGGCGTGAGCGTTGAGAAGTCCTCA…	MPNFFIDRPIFAWVIAIIIMLAGGLAILKLPVAQYPTIAPPAVTISATYPGADAKTVQDTVTQVIEQNMNGIDNLMYMSSNSDSTGTVQITLTFESGTDADIAQVQVQNKLQLAMPLLPQEVQQQGVSVEKSSSSFLMVVGVINTDGTMTQEDISDYVAANMKDPISRTSGVGDVQLFGSQYAMRIWMNPTELTKYQLTPVDVINAIKAQNAQVAAGQLGGTPPVKGQQLNASIIAQTRLTSTDEFGKILLKVNQDGSQVRLRDVAKIELGGENYDVIAKFNGQPASGLGIKLATGANALDTATAIRAELKKMEPFFPPGMKIVYPYDTTPFVKISIHEVVKTLVEAIILVFLVMYLFLQNFRATLIPTIAVPVVLLGTFAVLAAFGFSINTLTMFGMV…	MPNFFIDRPIFAWVIAIIIMLAGGLAILKLPVAQYPTIAPPAVTISASYPGADAKTVQDTVTQVIEQNMNGIDNLMYMSSNSDSTGTVQITLTFESGTDADIAQVQVQNKLQLAMPLLPQEVQQQGVSVEKSSSSFLMVVGVINTDGTMTQEDISDYVAANMKDAISRTSGVGDVQLFGSQYAMRIWMNPNELNKFQLTPVDVITAIKAQNAQVAAGQLGGTPPVKGQQLNASIIAQTRLTSTEEFGKILLKVNQDGSRVLLRDVAKIELGGENYDIIAEFNGQPASGLGIKLATGANALDTAAAIRAELAKMEPFFPSGLKIVYPYDTTPFVKISIHEVVKTLVEAIILVFLVMYLFLQNFRATLIPTIAVPVVLLGTFAVLAAFGFSINTLTMFGMV…	100	gnl|BL_ORD_ID|1011|hsp_num:0	1104			0	3144	tigecycline; acriflavine; tetracycline; rifampin; chloramphenicol; ampicillin; cefalotin; triclosan
	1_3328 # 3505576 # 3506688 # 1 # ID=1_3328;partial=00;start_type=ATG;rbs_motif=None;rbs_spacer=None;gc_cont=0.517	1_3328	3505576	3506688	+	Strict	250	261.2	vanG	38.87	3002909	protein homolog model	n/a	n/a	glycopeptide antibiotic	antibiotic target alteration	glycopeptide resistance gene cluster; Van ligase	ATGGAATGGGTTTTTAAGATGGCGAAATTGCGGGTAGGAATAGTATTTGGCGGTAAGTCGGCGGAACATGAAGTGTCTTTGCAATCAGCGAAAAATATCGTTGATGCGATCGATAAAACCCGCTTCGACGTGGTGCTGTTAGGGATAGATAAGGCGGGACAATGGCATGTTAACGATGCGGAAAATTATTTGCAGAATGCAGACGATCCGGCACATATCGCGCTACGTCCTTCGGCAATCAGTCTGGCCCAGGTGCCTGGCAAACATCAACACCAATTGATTAACGCCCAGAACGGGCAGCCGCTACCGACGGTAGATGTTATTTTTCCTATCGTCCACGGTACGCTGGGCGAAGACGGCTCATTGCAGGGGATGCTGCGCGTCGCAAACTTACCGTTT…	MEWVFKMAKLRVGIVFGGKSAEHEVSLQSAKNIVDAIDKTRFDVVLLGIDKAGQWHVNDAENYLQNADDPAHIALRPSAISLAQVPGKHQHQLINAQNGQPLPTVDVIFPIVHGTLGEDGSLQGMLRVANLPFVGSDVLSSAACMDKDIAKRLLRDAGLNIAPFITLTRTNRHAFSFAEVESRLGLPLFVKPANQGSSVGVSKVANEAQYQQAVALAFEFDHKVVVEQGIKGREIECAVLGNDNPQASTCGEIVLNSEFYAYDTKYIDDNGAQVVVPAQLPSGVNDKIRAIAIQAYQTLGCAGMARVDVFLTADNEVVINEINTLPGFTNISMYPKLWQASGLGYTDLISRLIELALERHTANNALKTTM	MQNKKIAVIFGGNSTEYEVSLQSASAVFENINTNKFDIIPIGITRSGEWYHYTGEKEKILNNTWFEDSKNLCPVVVSQNRSVKGFLEIASDKYRIIKVDLVFPVLHGKNGEDGTLQGIFELAGIPVVGCDTLSSALCMDKDRAHKLVSLAGISVPKSVTFKRFNEEAAMKEIEANLTYPLFIKPVRAGSSFGITKVIEKQELDAAIELAFEHDTEVIVEETINGFEVGCAVLGIDELIVGRVDEIELSSGFFDYTEKYTLKSSKIYMPARIDAEAEKRIQEAAVTIYKALGCSGFSRVDMFYTPSGEIVFNEVNTIPGFTSHSRYPNMMKGIGLSFSQMLDKLIGLYVE	106.02	gnl|BL_ORD_ID|1069|hsp_num:0	1157			0	1047	vancomycin
	1_3354 # 3538984 # 3539448 # -1 # ID=1_3354;partial=00;start_type=ATG;rbs_motif=AGGAG;rbs_spacer=7bp;gc_cont=0.544	1_3354	3538984	3539448	-	Perfect	290	310.1	golS	100	3000504	protein homolog model	n/a	n/a	monobactam; carbapenem; cephalosporin; cephamycin; penam; phenicol antibiotic; penem	antibiotic efflux	resistance-nodulation-cell division (RND) antibiotic efflux pump	ATGAACATCGGTAAAGCAGCTAAAGCATCGAAAGTCTCGGCCAAAATGATTCGCTACTATGAACAGATTGGTCTGATTCCCGCGGCAAGTCGGACGGATTCCGGCTATCGGGCCTATACCCAGGCTGATGTTAATCAATTGCATTTTATACGCCGCGCGCGCGACCTCGGTTTTTCAGTTGCTGAAATCAGCGACTTACTGAATCTTTGGAATAACCAGTCGCGGCAAAGCGCTGACGTCAAACGCCTGGCGCAGACGCACATTGATGAACTGGACAGACGTATCCAGAACATGCAGCACATGGCGCAAACCCTCAAAGCGCTGATTCACTGCTGCGCCGGCGACGCGCTGCCAGATTGTCCCATTCTGCATACGCTTGGACAACCTGACGATAGCGAG…	MNIGKAAKASKVSAKMIRYYEQIGLIPAASRTDSGYRAYTQADVNQLHFIRRARDLGFSVAEISDLLNLWNNQSRQSADVKRLAQTHIDELDRRIQNMQHMAQTLKALIHCCAGDALPDCPILHTLGQPDDSEPEARTGAVLRRPRRHGLAKRL	MNIGKAAKASKVSAKMIRYYEQIGLIPAASRTDSGYRAYTQADVNQLHFIRRARDLGFSVAEISDLLNLWNNQSRQSADVKRLAQTHIDELDRRIQNMQHMAQTLKALIHCCAGDALPDCPILHTLGQPDDSEPEARTGAVLRRPRRHGLAKRL	100	gnl|BL_ORD_ID|36|hsp_num:0	44			0	462	chloramphenicol
	1_3357 # 3543248 # 3546415 # 1 # ID=1_3357;partial=00;start_type=ATG;rbs_motif=AGG;rbs_spacer=10bp;gc_cont=0.567	1_3357	3543248	3546415	+	Strict	750	1209.9	adeF	60.67	3000777	protein homolog model	n/a	n/a	fluoroquinolone antibiotic; tetracycline antibiotic	antibiotic efflux	resistance-nodulation-cell division (RND) antibiotic efflux pump	ATGAAATTCACCCACTTTTTCATTGCACGACCCATCTTCGCCATCGTCCTGTCGCTGTTAATGCTGCTGGCTGGCGCTATCGCCTTTTTAAAACTGCCGCTGAGTGAATATCCGGCCGTTACGCCGCCCACGGTACAGGTTAGCGCCAGCTACCCCGGCGCTAACCCGCAAGTGATTGCCGATACGGTAGCCGCGCCGCTGGAACAGGTGATCAACGGCGTTGACGGCATGTTGTATATGAATACCCAGATGGCCATTGATGGTCGCATGGTTATCTCTATCGCCTTCGAACAGGGAACCGATCCTGATATGGCGCAAATTCAGGTGCAAAACCGGGTATCCCGCGCGCTGCCTCGCCTGCCCGAAGAAGTCCAGCGAATTGGCGTTGTAACGGAGAAA…	MKFTHFFIARPIFAIVLSLLMLLAGAIAFLKLPLSEYPAVTPPTVQVSASYPGANPQVIADTVAAPLEQVINGVDGMLYMNTQMAIDGRMVISIAFEQGTDPDMAQIQVQNRVSRALPRLPEEVQRIGVVTEKTSPDMLMVVHLVSPQKRYDSLYLSNFAIRQVRDELARLPGVGDVLVWGAGEYAMRVWLDPAKIANRGLTASDIVTALREQNVQVAAGSVGQQPEASAAFQMTVNTLGRLTSEEQFGEIVVKIGADGEVTRLRDVARVTLGADAYTLRSLLNGEAAPALQIIQSPGANAIDVSNAIRGKMDELQQNFPQDIEYRIAYDPTVFVRASLQSVAITLLEALVLVVLVVVLFLQTWRASIIPLVAVPVSLVGTFALMHLFGFSLNTLSLFG…	MNISKFFIDRPIFAGVLSVLILLAGLLSVFQLPISEYPEVVPPSVVVRAQYPGANPKVIAETVASPLEESINGVEDMLYMQSQANSDGNLTITVNFKLGIDPDKAQQLVQNRVSQAMPRLPEDVQRLGVTTLKSSPTLTMVVHLTSPDNRYDMTYLRNYAVLNVKDRLARLQGVGEVGLFGSGDYAMRVWLDPQKVAQRNLTATEIVNAIREQNIQVAAGTIGASPSNSPLQLSVNAQGRLTTEQEFADIILKTAPDGAVTRLGDVARVELAASQYGLRSLLDNKQAVAIPIFQAPGANALQVSDQVRSTMKELSKDFPSSIKYDIVYDPTQFVRASIKAVVHTLLEAITLVVVVVILFLQTWRASIIPLLAVPVSIIGTFALMLAFGYSINALSLFGM…	99.62	gnl|BL_ORD_ID|133|hsp_num:0	153			0	3126	tetracycline
	1_3572 # 3784416 # 3785360 # -1 # ID=1_3572;partial=00;start_type=ATG;rbs_motif=GGAG;rbs_spacer=6bp;gc_cont=0.476	1_3572	3784416	3785360	-	Strict	500	562	leuO	86.62	3003843	protein homolog model	n/a	n/a	nucleoside antibiotic; disinfecting agents and antiseptics	antibiotic efflux	major facilitator superfamily (MFS) antibiotic efflux pump	ATGCCAGAGGTCAAAACCGAAAAGCCGCATCTTTTAGATATGGGCAAACCACAGCTTCGCATGGTTGATTTGAACCTATTGACCGTGTTCGATGCGGTAATGCAAGAGCAGAATATTACGCGCGCCGCCCACACGCTGGGAATGTCGCAGCCTGCGGTCAGTAACGCCGTAGCGCGTCTGAAGGTTATGTTTAATGACGAACTTTTTGTTCGATATGGACGAGGAATTCAGCCGACTGCCCGTGCATTTCAGTTATTTGGTTCAGTCCGTCAGGCGTTACAATTGGTGCAAAATGAATTGCCGGGATCGGGGTTTGAGCCGACCAGCAGCGAACGTGTATTCAATCTTTGCGTGTGCAGTCCGCTGGATAATATCCTGACGTCACAGATTTATAATCGT…	MPEVKTEKPHLLDMGKPQLRMVDLNLLTVFDAVMQEQNITRAAHTLGMSQPAVSNAVARLKVMFNDELFVRYGRGIQPTARAFQLFGSVRQALQLVQNELPGSGFEPTSSERVFNLCVCSPLDNILTSQIYNRVEKIAPNIHVVFKASLNQNTEHQLRYQETEFVISYEEFRRPEFTSVPLFKDEMVLVASRKHPRISGPLLEGDVYNEQHAVVSLDRYASFSQPWYDTPDKQSSVAYQGMVLISVLNVVSQTHLVAIAPRWLAEEFAESLDLQILPLPLKLNSRTCYLSWHEAAGRDKGHQWMEDLLVSVCKR	MPEVQTDHPETAELSKPQLRMVDLNLLTVFDAVMQEQNITRAAHALGMSQPAVSNAVARLKVMFNDELFVRYGRGIQPTARAFQLFGSVRQALQLVQNELPGSGFEPASSERVFHLCVCSPLDSILTSQIYNHIEQIAPNIHVMFKSSLNQNTEHQLRYQETEFVISYEDFHRPEFTSVPLFKDEMVLVASKNHPTIKGPLLKHDVYNEQHAAVSLDRFASFSQTWYDTVDKQASIAYQGMAMMSVLSVVSQTHLVAIAPRWLAEEFAESLELQVLPLPLKQNSRTCYLSWHEAAGRDKGHQWMEEQLVSICKR	100	gnl|BL_ORD_ID|4919|hsp_num:0	5921			0	942	acriflavine; puromycin
	3_11 # 7019 # 7879 # -1 # ID=3_11;partial=00;start_type=ATG;rbs_motif=AGGA;rbs_spacer=5bp;gc_cont=0.490	3_11	7019	7879	-	Perfect	500	571.2	TEM-135	100	3000999	protein homolog model	n/a	n/a	monobactam; cephalosporin; penam; penem	antibiotic inactivation	TEM beta-lactamase	ATGAGTATTCAACATTTTCGTGTCGCCCTTATTCCCTTTTTTGCGGCATTTTGCCTTCCTGTTTTTGCTCACCCAGAAACGCTGGTGAAAGTAAAAGATGCTGAAGATCAGTTGGGTGCACGAGTGGGTTACATCGAACTGGATCTCAACAGCGGTAAGATCCTTGAGAGTTTTCGCCCCGAAGAACGTTTTCCAATGATGAGCACTTTTAAAGTTCTGCTATGTGGTGCGGTATTATCCCGTGTTGACGCCGGGCAAGAGCAACTCGGTCGCCGCATACACTATTCTCAGAATGACTTGGTTGAGTACTCACCAGTCACAGAAAAGCATCTTACGGATGGCATGACAGTAAGAGAATTATGCAGTGCTGCCATAACCATGAGTGATAACACTGCTGCC…	MSIQHFRVALIPFFAAFCLPVFAHPETLVKVKDAEDQLGARVGYIELDLNSGKILESFRPEERFPMMSTFKVLLCGAVLSRVDAGQEQLGRRIHYSQNDLVEYSPVTEKHLTDGMTVRELCSAAITMSDNTAANLLLTTIGGPKELTAFLHNMGDHVTRLDRWEPELNEAIPNDERDTTTPAAMATTLRKLLTGELLTLASRQQLIDWMEADKVAGPLLRSALPAGWFIADKSGAGERGSRGIIAALGPDGKPSRIVVIYTTGSQATMDERNRQIAEIGASLIKHW	MSIQHFRVALIPFFAAFCLPVFAHPETLVKVKDAEDQLGARVGYIELDLNSGKILESFRPEERFPMMSTFKVLLCGAVLSRVDAGQEQLGRRIHYSQNDLVEYSPVTEKHLTDGMTVRELCSAAITMSDNTAANLLLTTIGGPKELTAFLHNMGDHVTRLDRWEPELNEAIPNDERDTTTPAAMATTLRKLLTGELLTLASRQQLIDWMEADKVAGPLLRSALPAGWFIADKSGAGERGSRGIIAALGPDGKPSRIVVIYTTGSQATMDERNRQIAEIGASLIKHW	100	gnl|BL_ORD_ID|1558|hsp_num:0	1697			0	858	penicillin; ampicillin
	1_54 # 57532 # 58923 # 1 # ID=1_54;partial=00;start_type=ATG;rbs_motif=AGGAG;rbs_spacer=6bp;gc_cont=0.552	1_54	57532	58923	+	Strict	850	867.1	Escherichia coli UhpT with mutation conferring resistance to fosfomycin	95.68	3003890	protein variant model	E350Q	n/a	phosphonic acid antibiotic	antibiotic target alteration	antibiotic-resistant UhpT	ATGCTGGCCTTCTTAAACCAGGTGCGCAAGCCGACCCTGGATCTGCCGCTCGATGTGCGGCGTAAAATGTGGTTCAAGCCGTTCATGCAGTCCTATCTGGTGGTTTTTATCGGCTACCTGACCATGTACCTGATCCGCAAAAACTTTAACATCGCGCAGAACGACATGATTTCTACCTACGGGTTGAGCATGACCGAGCTGGGGATGATTGGCCTGGGCTTCTCGATCACCTACGGCGTGGGGAAAACGCTGGTTTCCTACTACGCTGACGGTAAAAATACCAAGCAGTTTCTACCGTTTATGTTGATCCTCTCCGCTATCTGTATGCTCGGCTTCAGCGCCAGCATGGGCGCGGGGTCAACCAGTCTGTTTCTGATGATCGCTTTCTATGCCCTGAGC…	MLAFLNQVRKPTLDLPLDVRRKMWFKPFMQSYLVVFIGYLTMYLIRKNFNIAQNDMISTYGLSMTELGMIGLGFSITYGVGKTLVSYYADGKNTKQFLPFMLILSAICMLGFSASMGAGSTSLFLMIAFYALSGFFQSTGGSCSYSTITKWTPRRKRGTFLGFWNISHNLGGAGAAGVALFGANYLFDGHVIGMFIFPSIIALIVGFIGLRFGSDSPESYGLGKAEELFGEEISEEDKETEENEMTKWQIFVEYVLKNKVIWLLCFSNIFLYVVRIGIDQWSTVYAFQELKLSKEVAIQGFTLFEVGALVGTLLWGWLSDLANGRRALVACVALALIIATLGVYQHASNQYVYLASLFALGFLVFGPQLLIGVAAVGFVPKKAIGAADGIKGTFAYLIG…	MLAFLNQVRKPTLDLPLEVRRKMWFKPFMQSYLVVFIGYLTMYLIRKNFNIAQNDMISTYGLSMTQLGMIGLGFSITYGVGKTLVSYYADGKNTKQFLPFMLILSAICMLGFSASMGSGSVSLFLMIAFYALSGFFQSTGGSCSYSTITKWTPRRKRGTFLGFWNISHNLGGAGAAGVALFGANYLFDGHVIGMFIFPSIIALIVGFIGLRYGSDSPESYGLGKAEELFGEEISEEDKETESTDMTKWQIFVEYVLKNKVIWLLCFANIFLYVVRIGIDQWSTVYAFQELKLSKAVAIQGFTLFEAGALVGTLLWGWLSDLANGRRGLVACIALALIIATLGVYQHASNEYIYLASLFALGFLVFGPQLLIGVAAVGFVPKKAIGAADGIKGTFAYLIG…	100	gnl|BL_ORD_ID|2126|hsp_num:0	2373			0	1389	fosfomycin
	1_390 # 438579 # 439763 # 1 # ID=1_390;partial=00;start_type=GTG;rbs_motif=AGGA;rbs_spacer=8bp;gc_cont=0.542	1_390	438579	439763	+	Strict	700	786.9	Escherichia coli EF-Tu mutants conferring resistance to Pulvomycin	99.49	3003369	protein variant model	R234F	n/a	elfamycin antibiotic	antibiotic target alteration	elfamycin resistant EF-Tu	GTGTCTAAAGAAAAATTTGAACGTACAAAACCGCACGTTAACGTCGGCACCATCGGCCACGTTGACCACGGTAAAACTACCCTGACCGCTGCAATCACCACCGTACTGGCTAAAACCTACGGCGGTGCTGCTCGTGCATTCGACCAGATCGATAACGCGCCGGAAGAAAAAGCGCGTGGTATCACCATCAACACTTCTCACGTTGAATACGATACCCCGACCCGCCACTACGCACACGTAGACTGCCCGGGGCACGCCGACTATGTTAAAAACATGATCACCGGTGCTGCTCAGATGGACGGCGCGATTCTGGTTGTTGCTGCGACTGACGGCCCGATGCCGCAGACCCGTGAGCACATCCTGCTGGGTCGTCAGGTAGGCGTTCCGTACATCATCGTG…	MSKEKFERTKPHVNVGTIGHVDHGKTTLTAAITTVLAKTYGGAARAFDQIDNAPEEKARGITINTSHVEYDTPTRHYAHVDCPGHADYVKNMITGAAQMDGAILVVAATDGPMPQTREHILLGRQVGVPYIIVFLNKCDMVDDEELLELVEMEVRELLSQYDFPGDDTPIVRGSALKALEGDAEWEAKIIELAGFLDSYIPEPERAIDKPFLLPIEDVFSISGRGTVVTGRVERGIIKVGEEVEIVGIKETQKSTCTGVEMFRKLLDEGRAGENVGVLLRGIKREEIERGQVLAKPGTIKPHTKFESEVYILSKDEGGRHTPFFKGYRPQFYFRTTDVTGTIELPEGVEMVMPGDNIKMVVTLIHPIAMDDGLRFAIREGGRTVGAGVVAKVLG	MLSPEGESTIVRNIAVSKEKFERTKPHVNVGTIGHVDHGKTTLTAAITTVLAKTYGGAARAFDQIDNAPEEKARGITINTSHVEYDTPTRHYAHVDCPGHADYVKNMITGAAQMDGAILVVAATDGPMPQTREHILLGRQVGVPYIIVFLNKCDMVDDEELLELVEMEVRELLSQYDFPGDDTPIVRGSALKALEGDAEWEAKILELAGFLDSYIPEPERAIDKPFLLPIEDVFSISGRGTVVTGRVERGIIKVGEEVEIVGIKETQKSTCTGVEMFRKLLDEGRAGENVGVLLRGIKREEIERGQVLAKPGTIKPHTKFESEVYILSKDEGGRHTPFFKGYRPQFYFRTTDVTGTIELPEGVEMVMPGDNIKMVVTLIHPIAMDDGLRFAIREGGRTV…	96.33	gnl|BL_ORD_ID|1969|hsp_num:0	2158			45	1227	pulvomycin
	1_1411 # 1535600 # 1536958 # 1 # ID=1_1411;partial=00;start_type=ATG;rbs_motif=GGAG;rbs_spacer=8bp;gc_cont=0.548	1_1411	1535600	1536958	+	Strict	850	898.7	Escherichia coli GlpT with mutation conferring resistance to fosfomycin	96.9	3003889	protein variant model	E448K	n/a	phosphonic acid antibiotic	antibiotic target alteration	antibiotic-resistant GlpT	ATGTTGAGTATTTTTAAACCAGCGCCGCATAAAGCGCGCTTGCCAGCGGCGGAGATTGATCCGACCTATCGCCGATTACGCTGGCAGATTTTCCTGGGGATATTCTTTGGCTATGCCGCGTATTATCTGGTGCGCAAGAACTTTGCCCTCGCGATGCCCTACCTGGTAGAACAGGGTTTTTCACGCGGCGATCTGGGCTTTGCGTTGTCCGGGATTTCCATCGCTTATGGTTTTTCGAAATTTATAATGGGTTCGGTGTCCGATCGCTCGAATCCGCGCGTTTTTCTGCCGGCAGGGTTGATTCTGGCCGCAGCAGTCATGTTGTTTATGGGCTTTGTGCCGTGGGCGACATCCAGCATCGCCGTGATGTTTGTGCTGTTGTTCCTTTGCGGCTGGTTC…	MLSIFKPAPHKARLPAAEIDPTYRRLRWQIFLGIFFGYAAYYLVRKNFALAMPYLVEQGFSRGDLGFALSGISIAYGFSKFIMGSVSDRSNPRVFLPAGLILAAAVMLFMGFVPWATSSIAVMFVLLFLCGWFQGMGWPPCGRTMVHWWSQKERGGIVSVWNCAHNVGGGIPPLLFLLGMAWFNDWKAALYMPAFGAIVVALFAFAMMRDTPQSCGLPPIEEYKNDYPDDYNEKAEEELTAKQIFMQYVLPNKLLWYIAIANVFVYLLRYGILDWSPTYLKEVKHFALDKSSWAYFLYEYAGIPGTLLCGWMSDKVFRGNRGATGVFFMTLVTIATIVYWMNPAGNPNVDMACMIIIGFLIYGPVMLIGLHALELAPKKAAGTAAGFTGLFGYLGGSVA…	MLSIFKPAPHKARLPAAEIDPTYRRLRWQIFLGIFFGYAAYYLVRKNFALAMPYLVEQGFSRGDLGFALSGISIAYGFSKFIMGSVSDRSNPRVFLPAGLILAAAVMLFMGFVPWATSSIAVMFVLLFLCGWFQGMGWPPCGRTMVHWWSQKERGGIVSVWNCAHNVGGGIPPLLFLLGMAWFNDWHAALYMPAFCAILVALFAFAMMRDTPQSCGLPPIEEYKNDYPDDYNEKAEQELTAKQIFMQYVLPNKLLWYIAIANVFVYLLRYGILDWSPTYLKEVKHFALDKSSWAYFLYEYAGIPGTLLCGWMSDKVFRGNRGATGVFFMTLVTIATIVYWMNPAGNPTVDMICMIVIGFLIYGPVMLIGLHALELAPKKAAGTAAGFTGLFGYLGGSVA…	100	gnl|BL_ORD_ID|2127|hsp_num:0	2372			0	1356	fosfomycin
	1_1422 # 1549216 # 1551852 # 1 # ID=1_1422;partial=00;start_type=ATG;rbs_motif=GGA;rbs_spacer=10bp;gc_cont=0.559	1_1422	1549216	1551852	+	Strict	1500	1679.5	Salmonella enterica gyrA conferring resistance to fluoroquinolones	99.89	3003926	protein variant model	D87Y	D87Y:1545	fluoroquinolone antibiotic	antibiotic target alteration	fluoroquinolone resistant gyrA	ATGAGCGACCTTGCGAGAGAAATTACACCGGTCAACATTGAGGAAGAGCTGAAAAGCTCCTATCTGGATTATGCGATGTCGGTCATTGTTGGCCGTGCGCTGCCGGATGTCCGAGATGGCCTGAAGCCGGTACACCGTCGCGTACTTTACGCCATGAACGTATTGGGCAATGACTGGAACAAAGCCTATAAAAAATCTGCCCGTGTCGTTGGTGACGTAATCGGTAAATACCATCCCCACGGCGATTCCGCAGTGTATTACACCATCGTTCGTATGGCGCAGCCATTCTCGCTGCGTTACATGCTGGTGGATGGTCAGGGTAACTTCGGTTCTATTGACGGCGACTCCGCGGCGGCAATGCGTTATACGGAGATCCGTCTGGCGAAAATCGCCCACGAA…	MSDLAREITPVNIEEELKSSYLDYAMSVIVGRALPDVRDGLKPVHRRVLYAMNVLGNDWNKAYKKSARVVGDVIGKYHPHGDSAVYYTIVRMAQPFSLRYMLVDGQGNFGSIDGDSAAAMRYTEIRLAKIAHELMADLEKETVDFVDNYDGTEKIPDVMPTKIPNLLVNGSSGIAVGMATNIPPHNLTEVINGCLAYIDNEDISIEGLMEHIPGPDFPTAAIINGRRGIEEAYRTGRGKVYIRARAEVEADAKTGRETIIVHEIPYQVNKARLIEKIAELVKDKRVEGISALRDESDKDGMRIVIEVKRDAVGEVVLNNLYSQTQLQVSFGINMVALHHGQPKIMNLKDIISAFVRHRREVVTRRTIFELRKARDRAHILEALAIALANIDPIIELIRR…	MSDLAREITPVNIEEELKSSYLDYAMSVIVGRALPDVRDGLKPVHRRVLYAMNVLGNDWNKAYKKSARVVGDVIGKYHPHGDSAVYDTIVRMAQPFSLRYMLVDGQGNFGSIDGDSAAAMRYTEIRLAKIAHELMADLEKETVDFVDNYDGTEKIPDVMPTKIPNLLVNGSSGIAVGMATNIPPHNLTEVINGCLAYIDNEDISIEGLMEHIPGPDFPTAAIINGRRGIEEAYRTGRGKVYIRARAEVEADAKTGRETIIVHEIPYQVNKARLIEKIAELVKDKRVEGISALRDESDKDGMRIVIEVKRDAVGEVVLNNLYSQTQLQVSFGINMVALHHGQPKIMNLKDIISAFVRHRREVVTRRTIFELRKARDRAHILEALAIALANIDPIIELIRR…	100	gnl|BL_ORD_ID|2156|hsp_num:0	2403			0	2634	ciprofloxacin; nalidixic acid
	1_3565 # 3776437 # 3778203 # -1 # ID=1_3565;partial=00;start_type=ATG;rbs_motif=AGGA;rbs_spacer=12bp;gc_cont=0.547	1_3565	3776437	3778203	-	Strict	500	564.7	Haemophilus influenzae PBP3 conferring resistance to beta-lactam antibiotics	51.85	3004446	protein variant model	D350N, S357N	n/a	cephalosporin; cephamycin; penam	antibiotic target alteration	Penicillin-binding protein mutations conferring resistance to beta-lactam antibiotics	ATGAAAGCAGCGGCAAAAACGCAAAAATCGAAACGCCAGGAAGAACAGACCAACTTCATCAGTTGGCGTTTTGCGTTGCTGTGCGGCTGTATTTTACTGGCGCTGGTTTTTTTACTTGGACGCGCGGCGTGGCTACAGATTATCGCCCCGGATATGCTGGTGCGTCAGGGCGATATGCGTTCGCTGCGTGTTCAGGAAGTCTCCACCTCACGCGGTATGATTACCGACCGTTCCGGGCGTCCACTGGCGGTCAGCGTACCGGTTAAGGCGATCTGGGCCGACCCGAAAGAAGTTCATGACGCCGGCGGCATCAGCGTTGGCGATCGCTGGAAAGCGCTTTCTACTGCGCTCAATATTCCGCTCGATCAGCTCTCCGCCCGTATCAACGCCAACCCGAAA…	MKAAAKTQKSKRQEEQTNFISWRFALLCGCILLALVFLLGRAAWLQIIAPDMLVRQGDMRSLRVQEVSTSRGMITDRSGRPLAVSVPVKAIWADPKEVHDAGGISVGDRWKALSTALNIPLDQLSARINANPKGRFIYLARQVNPDMADYIKKLKLPGIHLREESRRYYPSGEVTAHLIGFTNVDSQGIEGVEKSFDKWLTGQPGERIVRKDRYGRVIEDISSTDSQAAHNLALSIDERLQALVYRELNNAVAFNKAESGSAVLVDVNTGEVLAMANSPSYNPNNLAGTPKDAMRNRTITDVFEPGSTVKPMVVMTALQRGIVNENTVLNTVPYRINGHEIKDVARYSELTLTGVLQKSSNVGVSKLALAMPSSALVDTYSRFGLGKATNLGLVGERSG…	MVKFNSSRKSGKSKKTIRKLTAPETVKQNKPQKVFEKCFMRGRYMLSTVLILLGLCALVARAAYVQSINADTLSNEADKRSLRKDEVLSVRGSILDRNGQLLSVSVPMSAIVADPKTMLKENSLADKERIAALAEELGMTENDLVKKIEKNSKSGYLYLARQVELSKANYIRRLKIKGIILETEHRRFYPRVEEAAHVVGYTDIDGNGIEGIEKSFNSLLVGKDGSRTVRKDKRGNIVAHISDEKKYDAQDVTLSIDEKLQSMVYREIKKAVSENNAESGTAVLVDVRTGEVLAMATAPSYNPNNRVGVKSELMRNRAITDTFEPGSTVKPFVVLTALQRGVVKRDEIIDTTSFKLSGKEIVDVAPRAQQTLDEILMNSSNRGVSRLALRMPPSALMET…	96.39	gnl|BL_ORD_ID|2491|hsp_num:0	2886			63	1758	ceftriaxone; ampicillin; cefaclor; cefotaxime; cefditoren; cefdinir
	1_4096 # 4371328 # 4372512 # -1 # ID=1_4096;partial=00;start_type=ATG;rbs_motif=GAGG;rbs_spacer=8bp;gc_cont=0.540	1_4096	4371328	4372512	-	Strict	700	786.9	Escherichia coli EF-Tu mutants conferring resistance to Pulvomycin	99.49	3003369	protein variant model	R234F	n/a	elfamycin antibiotic	antibiotic target alteration	elfamycin resistant EF-Tu	ATGTCTAAAGAAAAGTTTGAACGTACAAAACCGCACGTTAACGTCGGTACTATCGGCCACGTTGACCATGGTAAAACAACGCTGACCGCTGCCATTACTACCGTACTGGCTAAAACCTACGGCGGTGCCGCCCGCGCATTCGACCAGATCGATAACGCGCCGGAAGAAAAAGCGCGTGGTATCACCATCAACACTTCTCACGTTGAATACGATACCCCGACCCGCCACTACGCACACGTAGACTGCCCGGGGCACGCCGACTATGTTAAAAACATGATCACCGGTGCTGCTCAGATGGACGGCGCGATTCTGGTTGTTGCTGCGACTGACGGCCCGATGCCGCAGACCCGTGAGCACATCCTGCTGGGTCGTCAGGTAGGCGTTCCGTACATCATCGTG…	MSKEKFERTKPHVNVGTIGHVDHGKTTLTAAITTVLAKTYGGAARAFDQIDNAPEEKARGITINTSHVEYDTPTRHYAHVDCPGHADYVKNMITGAAQMDGAILVVAATDGPMPQTREHILLGRQVGVPYIIVFLNKCDMVDDEELLELVEMEVRELLSQYDFPGDDTPIVRGSALKALEGDAEWEAKIIELAGFLDSYIPEPERAIDKPFLLPIEDVFSISGRGTVVTGRVERGIIKVGEEVEIVGIKETQKSTCTGVEMFRKLLDEGRAGENVGVLLRGIKREEIERGQVLAKPGTIKPHTKFESEVYILSKDEGGRHTPFFKGYRPQFYFRTTDVTGTIELPEGVEMVMPGDNIKMVVTLIHPIAMDDGLRFAIREGGRTVGAGVVAKVLG	MLSPEGESTIVRNIAVSKEKFERTKPHVNVGTIGHVDHGKTTLTAAITTVLAKTYGGAARAFDQIDNAPEEKARGITINTSHVEYDTPTRHYAHVDCPGHADYVKNMITGAAQMDGAILVVAATDGPMPQTREHILLGRQVGVPYIIVFLNKCDMVDDEELLELVEMEVRELLSQYDFPGDDTPIVRGSALKALEGDAEWEAKILELAGFLDSYIPEPERAIDKPFLLPIEDVFSISGRGTVVTGRVERGIIKVGEEVEIVGIKETQKSTCTGVEMFRKLLDEGRAGENVGVLLRGIKREEIERGQVLAKPGTIKPHTKFESEVYILSKDEGGRHTPFFKGYRPQFYFRTTDVTGTIELPEGVEMVMPGDNIKMVVTLIHPIAMDDGLRFAIREGGRTV…	96.33	gnl|BL_ORD_ID|1969|hsp_num:0	2158			45	1227	pulvomycin
	1_1549 # 1689763 # 1690485 # -1 # ID=1_1549;partial=00;start_type=ATG;rbs_motif=GAG;rbs_spacer=6bp;gc_cont=0.537	1_1549	1689763	1690485	-	Strict	450	456.8	baeR	94.14	3000828	protein overexpression model	n/a	n/a	aminoglycoside antibiotic; aminocoumarin antibiotic	antibiotic efflux	resistance-nodulation-cell division (RND) antibiotic efflux pump	ATGACTGAATTACCCATTGATGAAAACACGCCGCGCATTTTGATTGTTGAAGATGAACCCAAGCTGGGTCAGCTGCTTATTGACTACTTACGCGCGGCGAGTTACGCCCCCACGCTCATCAATCACGGCGACAAGGTACTGCCGTATGTGCGTCAAACGCCGCCGGATCTGATTCTGCTGGATCTGATGCTGCCGGGTACCGATGGTCTGACGCTATGCCGGGAGATTCGCCGTTTTTCCGACATCCCCATTGTGATGGTCACAGCCAAAATTGAAGAGATCGACCGGCTGCTGGGGCTGGAAATCGGCGCCGATGATTATATCTGTAAGCCTTACAGCCCGCGCGAAGTCGTGGCCCGCGTGAAAACCATTTTGCGCCGCTGTAAACCGCAGCGCGAA…	MTELPIDENTPRILIVEDEPKLGQLLIDYLRAASYAPTLINHGDKVLPYVRQTPPDLILLDLMLPGTDGLTLCREIRRFSDIPIVMVTAKIEEIDRLLGLEIGADDYICKPYSPREVVARVKTILRRCKPQRELQQQDAESPLMIDESRFQASWCGKALDLTPAEFRLLKTLSLEPGKVFSREQLLNHLYDDYRVVTDRTIDSHIKNLRRKLESLDAEQSFIRAVYGVGYRWEADACRLV	MTELPIDENTPRILIVEDEPKLGQLLIDYLRAASYAPSLISHGDQVLPYVRQTPPDLILLDLMLPGTDGLTLCREIRRFSDVPIVMVTAKIEEIDRLLGLEIGADDYICKPYSPREVVARVKTILRRCKPQRELQVLDAESPLIVDESRFQASWRSKLLDLTPAEFRLLKTLSHEPGKVFSREQLLNHLYDDYRVVTDRTIDSHIKNLRRKLEALDAEQSFIRAVYGVGYRWEADACRIA	100	gnl|BL_ORD_ID|1382|hsp_num:0	1337			0	717	neomycin; amikacin; kanamycin A; tobramycin; novobiocin; gentamicin
	1_2150 # 2287823 # 2288257 # -1 # ID=1_2150;partial=00;start_type=TTG;rbs_motif=None;rbs_spacer=None;gc_cont=0.474	1_2150	2287823	2288257	-	Strict	210	273.5	Escherichia coli AcrAB-TolC with MarR mutations conferring resistance to ciprofloxacin and tetracycline	92.36	3003378	protein overexpression model	n/a	n/a	fluoroquinolone antibiotic; cephalosporin; glycylcycline; penam; tetracycline antibiotic; rifamycin antibiotic; phenicol antibiotic; disinfecting agents and antiseptics	antibiotic target alteration; antibiotic efflux	resistance-nodulation-cell division (RND) antibiotic efflux pump	TTGAAAAGCACCAGTGATCTGTTCAATGAAATCATTCCGCTGGGTCGCTTGATCTACATGGTAAATCAAAAAAAAGATCGCCTGTTAAATAACTATTTATCCCCGCTGGATATCACCGCAACACAGTTTAAAGTGCTTTGCTCGATACGCTGCGCGGGATGTATTACCCCGGTTGAACTTAAAAAAGTGCTGTCTGTCGATCTCGGCGCATTGACGCGAATGCTCGACCGCCTGCTGTGCAAAGGCTGGATCGAAAGACTGCCGAATCCTAATGACAAACGCGGCGTACTGGTGAAGCTAACGCCGGACGGCGCGGCAATTTGTGAGCAATGTCATCAACGACCAGGGCAAGACCTGCATCAGGAATTAACAAAAAACTTAACGGCGGACGAAGTGGCA…	LKSTSDLFNEIIPLGRLIYMVNQKKDRLLNNYLSPLDITATQFKVLCSIRCAGCITPVELKKVLSVDLGALTRMLDRLLCKGWIERLPNPNDKRGVLVKLTPDGAAICEQCHQRPGQDLHQELTKNLTADEVATLEYLLKKILP	MKSTSDLFNEIIPLGRLIHMVNQKKDRLLNEYLSPLDITAAQFKVLCSIRCAACITPVELKKVLSVDLGALTRMLDRLVCKGWVERLPNPNDKRGVLVKLTTGGAAICEQCHQLVGQDLHQELTKNLTADEVATLEYLLKKVLP	100	gnl|BL_ORD_ID|1983|hsp_num:0	431			0	432	tigecycline; ciprofloxacin; tetracycline; rifampin; chloramphenicol; ampicillin; cefalotin; triclosan
	1_4000 # 4243160 # 4243618 # -1 # ID=1_4000;partial=00;start_type=ATG;rbs_motif=AGG;rbs_spacer=11bp;gc_cont=0.549	1_4000	4243160	4243618	-	Strict	300	300.4	Escherichia coli soxR with mutation conferring antibiotic resistance	96.05	3003381	protein overexpression model	n/a	n/a	fluoroquinolone antibiotic; cephalosporin; glycylcycline; penam; tetracycline antibiotic; rifamycin antibiotic; phenicol antibiotic; disinfecting agents and antiseptics	antibiotic target alteration; antibiotic efflux	ATP-binding cassette (ABC) antibiotic efflux pump; major facilitator superfamily (MFS) antibiotic efflux pump; resistance-nodulation-cell division (RND) antibiotic efflux pump	ATGGAAAAAAAATCTCCCCGTTTAAAAGCCTTACTGACGCCGGGGGAAGTTGCGAAACGTAGCGGTGTTGCTGTGTCCGCCCTGCACTTCTATGAAAGCAAAGGGCTAATTACCAGTATCCGTAATAGCGGTAACCAACGGCGATACAAGCGTGACGTGTTGCGTTATGTCGCGATTATCAAGATCGCCCAGCGTATCGGCATCCCGCTGGCAACTATCGGCGACGCGTTTGGTATCTTGCCGGAAGGACATACGTTAAGCGCGAAAGAGTGGAAGCAGCTCTCCTCGCAGTGGCGCGAAGAGTTAGACCGACGTATTCATACGCTGGTGGCGTTGCGCGATGAGCTGGACGGTTGTATCGGCTGCGGCTGTTTATCGCGTAGCGACTGTCCGCTGCGA…	MEKKSPRLKALLTPGEVAKRSGVAVSALHFYESKGLITSIRNSGNQRRYKRDVLRYVAIIKIAQRIGIPLATIGDAFGILPEGHTLSAKEWKQLSSQWREELDRRIHTLVALRDELDGCIGCGCLSRSDCPLRNPGDRLGEHGTGARLLEDD	MEKKLPRIKALLTPGEVAKRSGVAVSALHFYESKGLITSIRNSGNQRRYKRDVLRYVAIIKIAQRIGIPLATIGEAFGVLPEGHTLSAKEWKQLSSQWREELDRRIHTLVALRDELDGCIGCGCLSRSDCPLRNPGDRLGEEGTGARLLEDEQN	98.7	gnl|BL_ORD_ID|1972|hsp_num:0	1005			0	456	tigecycline; ciprofloxacin; tetracycline; rifampin; chloramphenicol; ampicillin; nalidixic acid; norfloxacin; cefalotin; triclosan
	1_4001 # 4243705 # 4244028 # 1 # ID=1_4001;partial=00;start_type=ATG;rbs_motif=GAGG;rbs_spacer=7bp;gc_cont=0.515	1_4001	4243705	4244028	+	Strict	200	209.1	Escherichia coli soxS with mutation conferring antibiotic resistance	95.33	3003511	protein overexpression model	n/a	n/a	fluoroquinolone antibiotic; monobactam; carbapenem; cephalosporin; glycylcycline; cephamycin; penam; tetracycline antibiotic; rifamycin antibiotic; phenicol antibiotic; penem; disinfecting agents and antiseptics	antibiotic target alteration; antibiotic efflux; reduced permeability to antibiotic	ATP-binding cassette (ABC) antibiotic efflux pump; major facilitator superfamily (MFS) antibiotic efflux pump; resistance-nodulation-cell division (RND) antibiotic efflux pump; General Bacterial Porin with reduced permeability to beta-lactams	ATGTCGCATCAGCAGATAATTCAGACCCTTATCGAATGGATTGATGAACATATCGACCAACCGCTAAACATTGATGTGGTGGCAAAAAAATCGGGCTACTCCAAGTGGTATTTGCAGCGGATGTTTCGTACGGTAACGCATCAAACATTAGGCGAGTATATTCGCCAGCGCCGTCTCCTGTTGGCGGCCGTTGAGCTACGAACGACCGAGCGCCCGATTTTTGATATCGCGATGGACCTGGGCTATGTATCGCAGCAAACCTTCTCGCGTGTATTCCGCCGCGAGTTCGATCGCACTCCCAGCGATTACCGTCACCGCCTGTAG	MSHQQIIQTLIEWIDEHIDQPLNIDVVAKKSGYSKWYLQRMFRTVTHQTLGEYIRQRRLLLAAVELRTTERPIFDIAMDLGYVSQQTFSRVFRREFDRTPSDYRHRL	MSHQKIIQDLIAWIDEHIDQPLNIDVVAKKSGYSKWYLQRMFRTVTHQTLGDYIRQRRLLLAAVELRTTERPIFDIAMDLGYVSQQTFSRVFRRQFDRTPSDYRHRL	100	gnl|BL_ORD_ID|1974|hsp_num:0	2066			0	321	tigecycline; ciprofloxacin; tetracycline; rifampin; chloramphenicol; ampicillin; norfloxacin; cefalotin; triclosan; enrofloxacin
SA616	1_369 # 421789 # 422421 # -1 # ID=1_369;partial=00;start_type=ATG;rbs_motif=AGGA;rbs_spacer=9bp;gc_cont=0.506	1_369	421789	422421	-	Strict	400	418.3	CRP	99.05	3000518	protein homolog model	n/a	n/a	macrolide antibiotic; fluoroquinolone antibiotic; penam	antibiotic efflux	resistance-nodulation-cell division (RND) antibiotic efflux pump	ATGGTGCTTGGCAAACCGCAAACAGACCCGACTCTTGAATGGTTCTTGTCTCATTGCCACATTCATAAGTACCCGTCAAAGAGCACGCTGATTCACCAGGGTGAAAAAGCAGAAACGCTGTACTACATCGTTAAAGGCTCCGTGGCAGTGCTGATCAAAGATGAAGAAGGGAAAGAAATGATCCTTTCTTATCTGAATCAGGGTGATTTTATTGGTGAACTGGGCCTGTTTGAAGAAGGCCAGGAACGCAGCGCCTGGGTACGTGCGAAAACCGCATGTGAGGTCGCTGAAATTTCCTACAAAAAATTTCGCCAATTAATCCAGGTCAACCCGGATATTCTGATGCGCCTCTCTTCCCAGATGGCTCGTCGCTTACAAGTCACCTCTGAAAAAGTAGGT…	MVLGKPQTDPTLEWFLSHCHIHKYPSKSTLIHQGEKAETLYYIVKGSVAVLIKDEEGKEMILSYLNQGDFIGELGLFEEGQERSAWVRAKTACEVAEISYKKFRQLIQVNPDILMRLSSQMARRLQVTSEKVGNLAFLDVTGRIAQTLLNLAKQPDAMTHPDGMQIKITRQEIGQIVGCSRETVGRILKMLEDQNLISAHGKTIVVYGTR	MVLGKPQTDPTLEWFLSHCHIHKYPSKSKLIHQGEKAETLYYIVKGSVAVLIKDEEGKEMILSYLNQGDFIGELGLFEEGQERSAWVRAKTACEVAEISYKKFRQLIQVNPDILMRLSAQMARRLQVTSEKVGNLAFLDVTGRIAQTLLNLAKQPDAMTHPDGMQIKITRQEIGQIVGCSRETVGRILKMLEDQNLISAHGKTIVVYGTR	100	gnl|BL_ORD_ID|803|hsp_num:0	869			0	630	erythromycin; cloxacillin; oxacillin; norfloxacin
	1_621 # 660339 # 661160 # 1 # ID=1_621;partial=00;start_type=ATG;rbs_motif=AGG;rbs_spacer=9bp;gc_cont=0.536	1_621	660339	661160	+	Strict	500	511.5	bacA	97.07	3002986	protein homolog model	n/a	n/a	peptide antibiotic	antibiotic target alteration	undecaprenyl pyrophosphate related proteins	ATGAGCGATATGCACTCGCTGCTGATAGCGGCAATTTTGGGTGTGGTCGAAGGATTGACGGAGTTTTTGCCGGTATCCAGCACGGGCCATATGATTATTGTGGGTCATCTGCTGGGGTTTGAAGGCGATACGGCCAAGACATTCGAAGTGGTGATTCAACTTGGATCTATTCTGGCGGTCGTGGTGATGTTCTGGCGGCGGTTGTTTGGCCTCATCGGTATTCACTTTGGCCGCCCGCTACAGCGTGAAGGTGAAAGTAAAGGTCGATTAACGTTGATTCACATCCTGCTGGGCATGATTCCGGCGGTGGTGCTGGGGTTAGTCTTTCATGACACGATCAAGTCGCTATTTAACCCAATTAACGTGATGTACGCGCTGGTGGTAGGCGGTCTGTTGCTG…	MSDMHSLLIAAILGVVEGLTEFLPVSSTGHMIIVGHLLGFEGDTAKTFEVVIQLGSILAVVVMFWRRLFGLIGIHFGRPLQREGESKGRLTLIHILLGMIPAVVLGLVFHDTIKSLFNPINVMYALVVGGLLLIAAECLKPKEPRAPGLDDMTYRQAFMIGCFQCLALWPGFSRSGATISGGMLMGVSRYAASEFSFLLAVPMMMGATVLDLYKSWSFLTAADIPMFAVGFVTAFVVALIAIKTFLQLIKRISFIPFAIYRFVVAAAVYVVFF	MSDMHSLLIAAILGVVEGLTEFLPVSSTGHMIIVGHLLGFEGDTAKTFEVVIQLGSILAVVVMFWRRLFGLIGIHFGRPLQHEGESKGRLTLIHILLGMIPAVVLGLLFHDTIKSLFNPINVMYALVVGGLLLIAAECLKPKEPRAPGLDDMTYRQAFMIGCFQCLALWPGFSRSGATISGGMLMGVSRYAASEFSFLLAVPMMMGATALDLYKSWGFLTSGDIPMFAVGFITAFVVALIAIKTFLQLIKRISFIPFAIYRFIVAAAVYVVFF	100	gnl|BL_ORD_ID|1680|hsp_num:0	1820			0	819	bacitracin; bacitracin A; bacitracin B; bacitracin F
	1_1004 # 1063904 # 1064089 # 1 # ID=1_1004;partial=00;start_type=ATG;rbs_motif=AGGAG;rbs_spacer=6bp;gc_cont=0.511	1_1004	1063904	1064089	+	Strict	100	102.4	rsmA	85.25	3005069	protein homolog model	n/a	n/a	fluoroquinolone antibiotic; diaminopyrimidine antibiotic; phenicol antibiotic	antibiotic efflux	resistance-nodulation-cell division (RND) antibiotic efflux pump	ATGCTGATTCTGACTCGTCGAGTTGGTGAGACCCTCATGATTGGCGATGAGGTCACCGTGACAGTTTTAGGGGTGAAGGGCAACCAGGTGCGTATTGGCGTGAACGCCCCGAAAGAAGTTTCTGTCCATCGTGAAGAGATCTACCAGCGTATCCAGGCTGAAAAATCCCAGCAGTCCAGTTACTAA	MLILTRRVGETLMIGDEVTVTVLGVKGNQVRIGVNAPKEVSVHREEIYQRIQAEKSQQSSY	MLILTRRVGETLMVGDDVTVTVLGVKGNQVRIGVNAPKEVAVHREEIYQRIQKEKDQEPNH	100	gnl|BL_ORD_ID|2788|hsp_num:0	3807			0	183	trimethoprim; chloramphenicol
	1_1010 # 1070400 # 1071938 # -1 # ID=1_1010;partial=00;start_type=ATG;rbs_motif=GAGG;rbs_spacer=8bp;gc_cont=0.571	1_1010	1070400	1071938	-	Strict	900	966.5	emrB	95.9	3000074	protein homolog model	n/a	n/a	fluoroquinolone antibiotic	antibiotic efflux	major facilitator superfamily (MFS) antibiotic efflux pump	ATGCAACAGCAAAAACCGCTGGAGGGCGCGCAGCTCGTCATCATGACGATCGCGCTGTCGCTGGCGACATTCATGCAGGTGCTGGACTCCACCATTGCCAACGTGGCGATTCCGACCATCGCCGGGAACCTGGGTTCTTCCCTAAGCCAGGGGACATGGGTTATCACCTCTTTCGGGGTGGCGAACGCTATCTCGATTCCCTTAACCGGCTGGCTGGCGAAACGTTTTGGCGAAGTCAAACTGTTCATGTGGTCGACGGTCGCCTTTGCCGCGGCCTCCTGGGCCTGTGGCGTATCCAGCAGCCTGAATATGCTTATCTTCTTCCGCGTGGTGCAGGGCGTGGTCGCCGGGCCGCTGATTCCGCTCTCGCAAAGCCTGTTGCTGAATAACTATCCGCCT…	MQQQKPLEGAQLVIMTIALSLATFMQVLDSTIANVAIPTIAGNLGSSLSQGTWVITSFGVANAISIPLTGWLAKRFGEVKLFMWSTVAFAAASWACGVSSSLNMLIFFRVVQGVVAGPLIPLSQSLLLNNYPPAKRSIALALWSMTVIVAPICGPILGGYISDNYHWGWIFFINVPIGIAVVLMTLHTLRGRETHTERRRIDAVGLALLVIGIGSLQIMLDRGKELDWFSSQEIIILTVVAVIAISFLIVWELTDDHPIVDLSLFKSRNFTIGCLCISLAYMLYFGAIVLLPQLLQEVYGYTATWAGLASAPVGIIPVILSPIIGRFAHKLDMRRLVTFSFIMYAVCFYWRAWTFEPGMDFGASAWPQFIQGFAVACFFMPLTTITLSGLPPERLAAAS…	MQQQKPLEGAQLVIMTIALSLATFMQVLDSTIANVAIPTIAGNLGSSLSQGTWVITSFGVANAISIPLTGWLAKRVGEVKLFLWSTIAFAIASWACGVSSSLNMLIFFRVIQGIVAGPLIPLSQSLLLNNYPPAKRSIALALWSMTVIVAPICGPILGGYISDNYHWGWIFFINVPIGVAVVLMTLQTLRGRETRTERRRIDAVGLALLVIGIGSLQIMLDRGKELDWFSSQEIIILTVVAVVAICFLIVWELTDDNPIVDLSLFKSRNFTIGCLCISLAYMLYFGAIVLLPQLLQEVYGYTATWAGLASAPVGIIPVILSPIIGRFAHKLDMRRLVTFSFIMYAVCFYWRAYTFEPGMDFGASAWPQFIQGFAVACFFMPLTTITLSGLPPERLAAAS…	100	gnl|BL_ORD_ID|1705|hsp_num:0	1847			0	1536	nalidixic acid
	1_1012 # 1073254 # 1073784 # -1 # ID=1_1012;partial=00;start_type=ATG;rbs_motif=GAGG;rbs_spacer=10bp;gc_cont=0.482	1_1012	1073254	1073784	-	Strict	280	327	emrR	93.14	3000516	protein homolog model	n/a	n/a	fluoroquinolone antibiotic	antibiotic efflux	major facilitator superfamily (MFS) antibiotic efflux pump	ATGGATAGTTCGTTTACGCCCATTGAACAAATGCTAAAATTTCGCGCCAGCCGTCACGAAGACTTTCCTTATCAGGAAATTCTTTTGACTCGTCTTTGTATGCACATGCAAGGCAAGCTCCTGGAAAACCGCAATAAAATGCTGAAGGCTCAAGGGATTAACGAGACGTTGTTTATGGCGTTGATTACGCTGGAGTCTCAGGAAAACCACAGTATTCAGCCGTCTGAATTAAGCTGCGCGCTGGGTTCATCTCGCACCAATGCGACACGCATTGCAGATGAGCTGGAAAAACGCGGCTGGATTGAGCGTCGTGAGAGCGATAACGACCGCCGTTGCCTGCATCTGCAATTAACGGAGAAAGGCCAGGCATTTTTGCAAGAAGTGCTTCCGCCTCAGCAT…	MDSSFTPIEQMLKFRASRHEDFPYQEILLTRLCMHMQGKLLENRNKMLKAQGINETLFMALITLESQENHSIQPSELSCALGSSRTNATRIADELEKRGWIERRESDNDRRCLHLQLTEKGQAFLQEVLPPQHHCLHQLWSSLSTAEKDQLEHITRKLLTRLDQMEQEGTVLEALR	MDSSFTPIEQMLKFRASRHEDFPYQEILLTRLCMHMQSKLLENRNKMLKAQGINETLFMALITLESQENHSIQPSELSCALGSSRTNATRIADELEKRGWIERRESDNDRRCLHLQLTEKGHEFLREVLPPQHNCLHQLWSALSTTEKDQLEQITRKLLSRLDQMEQDGVVLEAMS	100	gnl|BL_ORD_ID|1225|hsp_num:0	1330			0	525	nalidixic acid
	1_1392 # 1514972 # 1516618 # -1 # ID=1_1392;partial=00;start_type=ATG;rbs_motif=GAG;rbs_spacer=6bp;gc_cont=0.541	1_1392	1514972	1516618	-	Strict	400	718.8	ArnT	62.61	3005053	protein homolog model	n/a	n/a	peptide antibiotic	antibiotic target alteration	pmr phosphoethanolamine transferase	ATGATGAAATCGATACGCTATTATCTGGCTTTCGCCGCATTTATCGCGCTCTACTATGTTATTCCTGTCAATAGCCGCCTGCTCTGGCAGCCGGATGAAACGCGCTATGCCGAAATAAGTCGGGAGATGCTGGCGTCTGGCGACTGGATCGTGCCGCATTTTCTGGGATTACGTTATTTTGAAAAACCGATAGCCGGTTACTGGATAAACAGTCTGGGTCAGTGGCTTTTTGGCGCTACCAATTTTGGCGTGCGGGCTGGCGCTATTTTAACGACATTGCTGGCCGCAGCGCTGGTGGCGTGGCTGACGTTCCGCTTATGGCGGGATAAACGTACCGCGTTGCTCGCCTCCGTTATCTTTCTCTCCCTCTTTGCCGTTTACAGTATCGGGACGTATGCG…	MMKSIRYYLAFAAFIALYYVIPVNSRLLWQPDETRYAEISREMLASGDWIVPHFLGLRYFEKPIAGYWINSLGQWLFGATNFGVRAGAILTTLLAAALVAWLTFRLWRDKRTALLASVIFLSLFAVYSIGTYAVLDPMIALWLTAGMCCFWQGMQATTRTGKIGMFLLLGATCGLGVLTKGFLALAVPVVSVLPWVIVQKRWKDFLLYGWLAVLSCFVVVLPWAIAIARREADFWHYFFWVEHIQRFAMSDAQHKAPFWYYLPVLLAGSLPWLGLLPGALKLGWRERNGAFYLLGWTIMPLLFFSIAKGKLPTYVLSCFAPIAILMARFVLHNVKEGVAALRVNGGINLVFGIIGIVAAFVVSSWGPLKSPVWTHIETYKVFCVWGVFTVWAFVGWYSL…	MKSIRYGVSLIALFALYYLLPLNFRLLWQPDETRYAEISREMLATGDWVVPHFLGLRYFEKPIAGYWINSIGQWLFGHNNFGVRFGSVFAITMTALLVAWLAWRIFRDKRVAILSLIIFLTAMLVYAIGTYAVLDPMITLWLALAMCSFWGAVQAHSRSGKILGYVLLGVACGMGVMTKGFLALAVPVVGVLPWVIARKRWREVLTYGWLAVIVCTLVVLPWGLAIAQREPDFWRYFFWVEHIQRFAEKDAQHKAPFWYYIPFLIAGSLPWLALLPGALKRGWLERDEARGALYLLGWVAMPFLFFSIAKGKLPTYILPCFAPLSILMARYALEAAKTGAKALRINGMINLGVGLLGLIAVLVVSPWGFMHKPVWTKIELYKCLLAAIAFAVWALMGWL…	99.46	gnl|BL_ORD_ID|2779|hsp_num:0	3795			0	1653	colistin A; colistin B
	1_1395 # 1519490 # 1520473 # -1 # ID=1_1395;partial=00;start_type=ATG;rbs_motif=AGGA;rbs_spacer=8bp;gc_cont=0.538	1_1395	1519490	1520473	-	Strict	550	554.7	PmrF	87.42	3003578	protein homolog model	n/a	n/a	peptide antibiotic	antibiotic target alteration	pmr phosphoethanolamine transferase	ATGTTTGACGCCGCCCCCATAAAAAAAGTCTCGGTGGTTATTCCTGTCTATAACGAACAGGAAAGCCTGCCGGAATTGATAAGACGCACCACCGCCGCCTGCGAGAGTCTGGGCAAAGCGTGGGAGATTTTATTGATAGATGATGGTAGCAGCGATAGCTCGGCGGAGCTGATGGTTAAGGCGTCCCAGGAAGCCGATAGCCATATCATCTCTATTTTACTCAACCGTAACTACGGTCAACATGCAGCGATCATGGCGGGGTTTAGCCATGTAAGCGGCGATCTCATCATTACGCTGGATGCCGATCTGCAAAACCCGCCGGAAGAGATCCCGCGCCTGGTGGCGAAAGCCGATGAAGGGTTCGATGTGGTAGGCACCGTGCGCCAGAACCGACAGGAC…	MFDAAPIKKVSVVIPVYNEQESLPELIRRTTAACESLGKAWEILLIDDGSSDSSAELMVKASQEADSHIISILLNRNYGQHAAIMAGFSHVSGDLIITLDADLQNPPEEIPRLVAKADEGFDVVGTVRQNRQDSLFRKSASKIINLLIQRTTGKAMGDYGCMLRAYRRPIIDTMLRCHERSTFIPILANIFARRATEIPVHHAEREFGDSKYSFMRLINLMYDLVTCLTTTPLRLLSLLGSVIAIGGFSLSVLLIVLRLALGPQWAAEGVFMLFAVLFTFIGAQFIGMGLLGEYIGRIYNDVRARPRYFVQQVIYPESTPFTEESHQ	MFEIHPVKKVSVVIPVYNEQESLPELIRRTTTACESLGKEYEILLIDDGSSDNSAHMLVEASQAENSHIVSILLNRNYGQHSAIMAGFSHVTGDLIITLDADLQNPPEEIPRLVAKADEGYDVVGTVRQNRQDSWFRKTASKMINRLIQRTTGKAMGDYGCMLRAYRRHIVDAMLHCHERSTFIPILANIFARRAIEIPVHHAEREFGESKYSFMRLINLMYDLVTCLTTTPLRMLSLLGSIIAIGGFSIAVLLVILRLTFGPQWAAEGVFMLFAVLFTFIGAQFIGMGLLGEYIGRIYTDVRARPRYFVQQVIRPSSKENE	101.55	gnl|BL_ORD_ID|1936|hsp_num:0	2014			0	954	polymyxin B
	1_1668 # 1820416 # 1821840 # 1 # ID=1_1668;partial=00;start_type=TTG;rbs_motif=AGG;rbs_spacer=6bp;gc_cont=0.538	1_1668	1820416	1821840	+	Strict	900	909.1	MdtK	99.16	3001327	protein homolog model	n/a	n/a	fluoroquinolone antibiotic	antibiotic efflux	multidrug and toxic compound extrusion (MATE) transporter	TTGAACGTCTCCACTGCCTTACGCCAGGCTGTCGTCCGTACGCCCTGGTATGCCAAACGCAAGAGCTACAAAGTGTTGTTCTGGCGTGAAATCACCCCACTTGCTATCCCTATTTTTCTGGAAAATACCTGTGTTTTGCTAATGGGCGTGCTCAGTACTTTTCTCGTCAGTTGGCTGGGCAAGGAAGCAATGGCGGGCGTGGGGCTTGCCGACAGTTTTAATATGGTAATTATGGCTTTTTTTGCGGCTATCGATCTTGGTACTACGGTGGTGGTTGCCTTTAGCCTGGGCAAGCGCGACAGGCGACGGGCAAGGGCGGCGGCGCGCCAGTCGCTGGTGATTATGACGCTATTTGCCGTTGTGCTGGCAGTGGTCATTCATTATTTCGGCAGTGAAATT…	MNVSTALRQAVVRTPWYAKRKSYKVLFWREITPLAIPIFLENTCVLLMGVLSTFLVSWLGKEAMAGVGLADSFNMVIMAFFAAIDLGTTVVVAFSLGKRDRRRARAAARQSLVIMTLFAVVLAVVIHYFGSEIINIVAGEATSEVKGLALTYLELTVLSYPAAAIALIGSGALRGAGNTKIPLMINGGMNILNIIISSILIYGAFSWQGLGFAGAGLGLTISRYIGAVAIIWVLMIGFNPALRIPLKSYLKPLNFGIIWEVMGIGIPASIESVLFNGGKLLTQMFVAGMGTNVIAGNFIAFSVAALINLPGNALGSASTIITGKRLGTGQIGQAERQLRHVFWMSTIVLTAIAWGTAPFAGLFASFYTQEQDVKEVVKVLLWLNAVFMPIWAAAWVLPS…	MNVSTALRQAVVRTPWYAKRKSYKVLFWREITPLAIPIFLENTCVLLMGVLSTFLVSWLGKEAMAGVGLADSFNMVIMAFFAAIDLGTTVVVAFSLGKRDRRRARAAARQSLVIMTLFAVVLAVVIHYFGSEIINIVAGEATPEVKGLALTYLELTVLSYPAAAIALIGSGALRGAGNTKIPLMINGGMNILNIIISSILIYGAFSWQGLGFAGAGLGLTISRYIGAVAIIWVLMIGFNPALRIPLKSYLKPLNFGIIWEVMGIGIPASIESVLFNGSKLLTQMFVAGMGTNVIAGNFIAFSVAALINLPGNALGSASTIITGKRLGTGQIGQAERQLRHVFWMSTIVLTAIAWGTAPFAGLFASFYTQEQDVKEVVKVLLWLNAAFMPIWAAAWVLPS…	100	gnl|BL_ORD_ID|1649|hsp_num:0	1752			0	1422	ciprofloxacin
	1_2111 # 2250561 # 2250923 # 1 # ID=1_2111;partial=00;start_type=ATG;rbs_motif=AGGAG;rbs_spacer=7bp;gc_cont=0.446	1_2111	2250561	2250923	+	Strict	150	169.1	Klebsiella pneumoniae KpnE	76.67	3004580	protein homolog model	n/a	n/a	macrolide antibiotic; aminoglycoside antibiotic; cephalosporin; tetracycline antibiotic; peptide antibiotic; rifamycin antibiotic; disinfecting agents and antiseptics	antibiotic efflux	small multidrug resistance (SMR) antibiotic efflux pump	ATGTTTTACTGGATTTTATTAGCTCTGGCTATCGCGACTGAAATTACCGGCACGCTCTCAATGAAATGGGCTAGCGTGGGTAATGGCAATGCGGGTTTTATTTTAATGCTGGTGATGATCACGCTGTCATATATATTTCTTTCTTTTGCGGTAAAAAAGATTGCCCTGGGTGTAGCGTATGCCTTATGGGAAGGGATCGGCATTTTATTTATTACCATTTTTAGCGTGCTGCTATTTGATGAAGCATTATCAACCATGAAGATTGCCGGCTTGCTGACGCTGGTCGCCGGCATAGTATTGATCAAATCAGGGACGCGTAAACCCGGCAAACCGGTGAAGGAGGCGACTCGTGCAACAATTTGA	MFYWILLALAIATEITGTLSMKWASVGNGNAGFILMLVMITLSYIFLSFAVKKIALGVAYALWEGIGILFITIFSVLLFDEALSTMKIAGLLTLVAGIVLIKSGTRKPGKPVKEATRATI	MFYWILLALAIIAEITGTLSMKWASVSGGHTGFILMLAMIALSYIFLAFAVKKIALGVAYALWEGIGILLITLFSVLLFDESLSLLKIAGLTTLVIGIVLIKSGTQKKASSQQEVAHAAV	100	gnl|BL_ORD_ID|2715|hsp_num:0	3283			0	360	erythromycin; streptomycin; tetracycline; cefepime; ceftriaxone; rifampin; colistin A; colistin B; triclosan; benzalkonium chloride; chlorhexidine
	1_2112 # 2250910 # 2251239 # 1 # ID=1_2112;partial=00;start_type=GTG;rbs_motif=AGGAG;rbs_spacer=7bp;gc_cont=0.558	1_2112	2250910	2251239	+	Strict	150	189.1	Klebsiella pneumoniae KpnF	87.16	3004583	protein homolog model	n/a	n/a	macrolide antibiotic; aminoglycoside antibiotic; cephalosporin; tetracycline antibiotic; peptide antibiotic; rifamycin antibiotic; disinfecting agents and antiseptics	antibiotic efflux	small multidrug resistance (SMR) antibiotic efflux pump	GTGCAACAATTTGAATGGATACACGGCGCCTGGCTTGGGCTGGCAATAATGCTGGAAATCGCGGCTAACGTACTGTTGAAATTTTCGGACGGCTTTCGCCGTAAATGCTATGGCATCTTATCGCTTGCCGCTGTTCTGGCCGCCTTCAGCGCGCTTTCCCAGGCGGTAAAAGGGATAGACCTGTCGGTGGCGTATGCGTTATGGGGCGGTTTTGGTATTGCCGCCACGCTGGCGGCGGGCTGGGTGCTCTTCGGCCAGCGCTTAAACCCCAAAGGCTGGGTTGGCGTGATATTGCTGCTCGCCGGAATGGTCATGATCAAATTTGCCTGA	MQQFEWIHGAWLGLAIMLEIAANVLLKFSDGFRRKCYGILSLAAVLAAFSALSQAVKGIDLSVAYALWGGFGIAATLAAGWVLFGQRLNPKGWVGVILLLAGMVMIKFA	MQQFEWIHAAWLAIAIVLEIIANVFLKFSDGFRRKIYGILSLAAVLGAFSALSQAVKGIDLSVAYALWGGFGIAATIAAGWVLFGQRLNNKGWAGVILLVAGMVLIKLA	100	gnl|BL_ORD_ID|2717|hsp_num:0	3286			0	327	erythromycin; streptomycin; tetracycline; cefepime; ceftriaxone; rifampin; colistin A; colistin B; triclosan; benzalkonium chloride; chlorhexidine
	1_2149 # 2287420 # 2287803 # -1 # ID=1_2149;partial=00;start_type=ATG;rbs_motif=GAGG;rbs_spacer=7bp;gc_cont=0.471	1_2149	2287420	2287803	-	Strict	230	247.3	marA	95.24	3000263	protein homolog model	n/a	n/a	fluoroquinolone antibiotic; monobactam; carbapenem; cephalosporin; glycylcycline; cephamycin; penam; tetracycline antibiotic; rifamycin antibiotic; phenicol antibiotic; penem; disinfecting agents and antiseptics	antibiotic efflux; reduced permeability to antibiotic	resistance-nodulation-cell division (RND) antibiotic efflux pump; General Bacterial Porin with reduced permeability to beta-lactams	ATGTCCAGACGCAACACTGACGCTATTACTATTCATAGCATTTTGGACTGGATCGAGGATAACCTGGAGTCGCCGCTCTCACTGGAAAAAGTGTCTGAGCGTTCAGGATATTCCAAATGGCACCTGCAACGGATGTTTAAAAAAGAGACCGGTCATTCATTAGGCCAATACATCCGCAGCCGTAAAATGACGGAAATCGCGCAAAAATTAAAAGAGAGCAACGAGCCCATTCTCTATCTGGCGGAACGCTATGGCTTTGAGTCACAGCAAACATTGACCCGGACGTTCAAAAACTACTTTGATGTGCCGCCACACAAATACCGGATCACCAATATGCATGGCGAATCACGGTATATGCTGCCGCTGAACCATGGCAACTACTAG	MSRRNTDAITIHSILDWIEDNLESPLSLEKVSERSGYSKWHLQRMFKKETGHSLGQYIRSRKMTEIAQKLKESNEPILYLAERYGFESQQTLTRTFKNYFDVPPHKYRITNMHGESRYMLPLNHGNY	MSRRNTDAITIHSILDWIEDNLESPLSLEKVSERSGYSKWHLQRMFKKETGHSLGQYIRSRKMTEIAQKLKESNEPILYLAERYGFESQQTLTRTFKNYFDVPPHKYRMTNMQGESRFLHPLNHYNS	100	gnl|BL_ORD_ID|1771|hsp_num:0	1922			0	378	tigecycline; tetracycline; rifampin; chloramphenicol; ampicillin; cefalotin; triclosan
	1_2244 # 2393159 # 2393596 # 1 # ID=1_2244;partial=00;start_type=ATG;rbs_motif=AGGAG;rbs_spacer=7bp;gc_cont=0.523	1_2244	2393159	2393596	+	Strict	275	298.1	AAC(6')-Iy	97.24	3002569	protein homolog model	n/a	n/a	aminoglycoside antibiotic	antibiotic inactivation	AAC(6')	ATGGACATCAGGCAAATGAACAAAACCCATCTGGAGCACTGGCGCGGATTGCGAAAACAGCTCTGGCCCGGTCACCCGGATGACGCCCATCTGGCAGACGGCGAAGAAATCCTGCAAGCCGATCATTTGGCATCATTTGTTGCGATGGCAGACGGGGTGGCGATTGGCTTTGCGGATGCCTCAATCCGCCACGATTATGTCAATGGCTGTGACAGTTCGCCCGTGGCTTTTCTTGAAGGTATTTTTGTTCTCCCCTCGTTCCGTCAACGCGGCGTAGCGAAACAATTGATTGCAGCGGTGCAACGATGGGGAACGAATAAAGGGTGTCGGGAAATGGCCTCTGATACCACGCCGGAAAATACAATTTCCCAGAAAGTTCACCTGGCATTAGGATTTGAG…	MDIRQMNKTHLEHWRGLRKQLWPGHPDDAHLADGEEILQADHLASFVAMADGVAIGFADASIRHDYVNGCDSSPVAFLEGIFVLPSFRQRGVAKQLIAAVQRWGTNKGCREMASDTTPENTISQKVHLALGFEETERVIFYRKRC	MDIRQMNKTHLEHWRGLRKQLWPGHPDDAHLADGEEILQADHLASFIAMADGVAIGFADASIRHDYVNGCDSSPVVFLEGIFVLPSFRQRGVAKQLIAAVQRWGTNKGCREMASDTSPENTISQKVHQALGFEETERVIFYRKRC	100	gnl|BL_ORD_ID|330|hsp_num:0	360			0	435	dibekacin; amikacin; sisomicin; netilmicin; tobramycin; 2'-N-ethylnetilmicin; 5-episisomicin
	1_2403 # 2550216 # 2550629 # 1 # ID=1_2403;partial=00;start_type=ATG;rbs_motif=GAG;rbs_spacer=9bp;gc_cont=0.454	1_2403	2550216	2550629	+	Strict	240	245.7	H-NS	94.89	3000676	protein homolog model	n/a	n/a	macrolide antibiotic; fluoroquinolone antibiotic; cephalosporin; cephamycin; penam; tetracycline antibiotic	antibiotic efflux	major facilitator superfamily (MFS) antibiotic efflux pump; resistance-nodulation-cell division (RND) antibiotic efflux pump	ATGAGCGAAGCACTTAAAATTCTGAACAACATCCGTACTCTTCGTGCGCAGGCAAGAGAATGTACTCTGGAAACGCTTGAAGAAATGCTGGAAAAATTAGAAGTTGTCGTTAATGAGCGTCGTGAAGAAGAAAGCGCTGCTGCTGCTGAAGTGGAAGAACGCACTCGTAAACTGCAACAGTATCGTGAAATGTTAATTGCCGACGGCATTGACCCGAATGAACTGCTGAATAGCATGGCTGCCGCTAAATCCGGTACCAAAGCTAAACGCGCAGCTCGTCCGGCTAAATATAGCTATGTTGACGAAAACGGTGAAACTAAAACCTGGACTGGCCAGGGTCGTACACCGGCTGTAATCAAAAAAGCAATGGAAGAACAAGGTAAGCAACTGGAAGATTTC…	MSEALKILNNIRTLRAQARECTLETLEEMLEKLEVVVNERREEESAAAAEVEERTRKLQQYREMLIADGIDPNELLNSMAAAKSGTKAKRAARPAKYSYVDENGETKTWTGQGRTPAVIKKAMEEQGKQLEDFLIKE	MSEALKILNNIRTLRAQARECTLETLEEMLEKLEVVVNERREEESAAAAEVEERTRKLQQYREMLIADGIDPNELLNSLAAVKSGTKAKRAQRPAKYSYVDENGETKTWTGQGRTPAVIKKAMDEQGKSLDDFLIKQ	100	gnl|BL_ORD_ID|1144|hsp_num:0	1248			0	411	erythromycin; cloxacillin; ciprofloxacin; tetracycline; oxacillin; norfloxacin
	1_2621 # 2764208 # 2764930 # -1 # ID=1_2621;partial=00;start_type=ATG;rbs_motif=None;rbs_spacer=None;gc_cont=0.492	1_2621	2764208	2764930	-	Strict	470	488.4	sdiA	99.58	3000826	protein homolog model	n/a	n/a	fluoroquinolone antibiotic; cephalosporin; glycylcycline; penam; tetracycline antibiotic; rifamycin antibiotic; phenicol antibiotic; disinfecting agents and antiseptics	antibiotic efflux	resistance-nodulation-cell division (RND) antibiotic efflux pump	ATGCAGGAAAATGATTTCTTCACCTGGCGACGCGCAATGTTGTTACGCTTTCAGGAGATGGCGGCAGCAGAGGATGTTTATACTGAATTGCAATATCAGACACAGCGGCTGGAATTTGATTATTATGCCCTGTGTGTTCGTCATCCCGTCCCCTTTACCCGGCCTAAAATATCGCTTCGTACCACTTATCCTCCGGCGTGGGTAACGCATTACCAGTCCGAAAACTATTTTGCGATCGATCCGGTATTAAAGCCGGAAAATTTCAGGCAGGGTCATTTACATTGGGATGACGTGCTATTTCATGAAGCGCAGGCGATGTGGGATGCCGCCCAGCGTTTCGGATTACGCAGAGGCGTAACCCAGTGTGTGATGTTGCCGAACCGGGCGCTGGGCTTTTTA…	MQENDFFTWRRAMLLRFQEMAAAEDVYTELQYQTQRLEFDYYALCVRHPVPFTRPKISLRTTYPPAWVTHYQSENYFAIDPVLKPENFRQGHLHWDDVLFHEAQAMWDAAQRFGLRRGVTQCVMLPNRALGFLSFSRSSLRCSSFTYDEVELRLQLLARESLSALTRFEDDMVMAPEMRFSKREKEILKWTAEGKTSSEIAIILSISENTVNFHQKNMQKKFNAPNKTQIACYAAATGLI	MQENDFFTWRRAMLLRFQEMAAAEDVYTELQYQTQRLEFDYYALCVRHPVPFTRPKISLRTTYPPAWVTHYQSENYFAIDPVLKPENFRQGHLHWDDVLFHEAKAMWDAAQRFGLRRGVTQCVMLPNRALGFLSFSRSSLRCSSFTYDEVELRLQLLARESLSALTRFEDDMVMAPEMRFSKREKEILKWTAEGKTSSEIAIILSISENTVNFHQKNMQKKFNAPNKTQIACYAAATGLI	100	gnl|BL_ORD_ID|208|hsp_num:0	228			0	720	tigecycline; tetracycline; rifampin; chloramphenicol; ampicillin; cefalotin; triclosan
	1_2791 # 2932277 # 2934025 # -1 # ID=1_2791;partial=00;start_type=ATG;rbs_motif=None;rbs_spacer=None;gc_cont=0.516	1_2791	2932277	2934025	-	Strict	1000	1067.4	msbA	96.39	3003950	protein homolog model	n/a	n/a	nitroimidazole antibiotic	antibiotic efflux	ATP-binding cassette (ABC) antibiotic efflux pump	ATGCATAACGATAAAGATCTCTCTACGTGGCAGACCTTCCGCCGACTGTGGCCAACCATAGCGCCTTTTAAAGCAGGTCTGATCGTGGCGGGCATAGCGTTAATTCTCAACGCAGCCAGCGATACCTTCATGCTATCGCTCCTCAAGCCATTACTGGATGATGGTTTCGGTAAAACGGATCGCTCAGTGTTGCTGTGGATGCCGCTGGTGGTTATTGGGCTGATGATATTACGAGGCATCACTAGCTATATCTCCAGCTACTGTATTTCATGGGTGTCAGGCAAGGTGGTAATGACCATGCGCCGTCGCCTGTTTGGCCATATGATGGGAATGCCCGTCGCCTTCTTTGATAAACAGTCTACCGGTACGCTGCTGTCGCGTATTACTTACGATTCAGAA…	MHNDKDLSTWQTFRRLWPTIAPFKAGLIVAGIALILNAASDTFMLSLLKPLLDDGFGKTDRSVLLWMPLVVIGLMILRGITSYISSYCISWVSGKVVMTMRRRLFGHMMGMPVAFFDKQSTGTLLSRITYDSEQVASSSSGALITVVREGASIIGLFIMMFYYSWQLSIILVVLAPIVSIAIRVVSKRFRSISKNMQNTMGQVTTSAEQMLKGHKEVLIFGGQEVETKRFDKVSNKMRLQGMKMVSASSISDPIIQLIASLALAFVLYAASFPSVMDSLTAGTITVVFSSMIALMRPLKSLTNVNAQFQRGMAACQTLFAILDSEQEKDEGKRVIDRATGDLEFRNVTFTYPGREVPALRNINLKIPAGKTVALVGRSGSGKSTIASLITRFYDIDEGH…	MHNDKDLSTWQTFRRLWPTIAPFKAGLIVAGVALILNAASDTFMLSLLKPLLDDGFGKTDRSVLVWMPLVVIGLMILRGITSYVSSYCISWVSGKVVMTMRRRLFGHMMGMPVSFFDKQSTGTLLSRITYDSEQVASSSSGALITVVREGASIIGLFIMMFYYSWQLSIILIVLAPIVSIAIRVVSKRFRNISKNMQNTMGQVTTSAEQMLKGHKEVLIFGGQEVETKRFDKVSNRMRLQGMKMVSASSISDPIIQLIASLALAFVLYAASFPSVMDSLTAGTITVVFSSMIALMRPLKSLTNVNAQFQRGMAACQTLFTILDSEQEKDEGKRVIERATGDVEFRNVTFTYPGRDVPALRNINLKIPAGKTVALVGRSGSGKSTIASLITRFYDIDEGE…	100	gnl|BL_ORD_ID|2183|hsp_num:0	2423			0	1746	metronidazole
	1_2866 # 3020996 # 3022228 # -1 # ID=1_2866;partial=00;start_type=ATG;rbs_motif=GAG;rbs_spacer=5bp;gc_cont=0.554	1_2866	3020996	3022228	-	Strict	700	700.7	Escherichia coli mdfA	87.71	3001328	protein homolog model	n/a	n/a	tetracycline antibiotic; disinfecting agents and antiseptics	antibiotic efflux	major facilitator superfamily (MFS) antibiotic efflux pump	ATGCAGAATCGTTTACAATCAGGCGGCAGGCTGGGACGTCAGGCGCTGCTTTTTCCTCTCTGTCTGGTGCTGTACGAATTTTCTACTTATATTGGCAACGACATGATCCAGCCGGGTATGCTGGCGGTGGTTGAGCAGTATCAGGCGTGCCTGGACTGGGTTCCGACGTCCATGACCGCTTATCTGGCGGGCGGTATGTTCTTACAGTGGCTGCTTGGCCCGTTGTCTGACCGGATTGGCCGTCGTCCCGTGATGCTGGCGGGCGTCGTGTGGTTTATTGTCACCTGCCTGGCGACGTTACTGGCGAAAAACATCGAACAATTTACCTTCCTGCGTTTTTTGCAAGGGATTAGCCTGTGTTTTATCGGCGCTGTAGGGTATGCCGCGATTCAGGAGTCC…	MQNRLQSGGRLGRQALLFPLCLVLYEFSTYIGNDMIQPGMLAVVEQYQACLDWVPTSMTAYLAGGMFLQWLLGPLSDRIGRRPVMLAGVVWFIVTCLATLLAKNIEQFTFLRFLQGISLCFIGAVGYAAIQESFEEAVCIKITALMANVALIAPLLGPLVGAAWVHVLPWEGMFILFAALAAIAFFGLQRAMPETATRRGETLSFKALGRDYRLVIKNRRFVAGALALGFVSLPLLAWIAQSPIIIISGEQLSSYEYGLLQVPVFGALIAGNLVLARLTSRRTVRSLIVMGGWPIVAGLIIAAAATVVSSHAYLWMTAGLSVYAFGIGLANAGLVRLTLFSSDMSKGTVSAAMGMLQMLIFTVGIEVSKHAWLSGGNGLFSLFNLANGILWLLLMLVFL…	MQNKLASGARLGRQALLFPLCLVLYEFSTYIGNDMRQPGMLENVEQYQAGIEWVPTSMNAYLAGGMFIQWLLGPLSDRIGRRPVMLAGVVWFIVTCLAILLAQNIEQFTLLRFLHGISLCFIGAVGYDAIQESFEEAVCIKITALMANVALIAPLLGPLVGASWIHVLPWEGMFVLFAALAAISFFGLQRAMPETATRIGEKLSLKELGRDYKLVLKNGRFVAGALALGFLSLPLLAWIAQSPIIIITGEQLSSYEYGLLQVPIFGALIAGNLLLARLTSRRTVRSLIIMGGWPIMIGLLVAAAATVISSHAYLWMTAGLSIYAFGIGLANAGLVRLTLFASVMSKGTVSAAMGMLQMLIFTVGIEISKHAWLNGGNGLFNLFNLVNGILLLSLMVIFL…	100	gnl|BL_ORD_ID|2417|hsp_num:0	37			0	1221	tetracycline; benzalkonium chloride
	1_3016 # 3180528 # 3181205 # 1 # ID=1_3016;partial=00;start_type=GTG;rbs_motif=GAGGA;rbs_spacer=3bp;gc_cont=0.563	1_3016	3180528	3181205	+	Strict	400	422.9	kdpE	91.96	3003841	protein homolog model	n/a	n/a	aminoglycoside antibiotic	antibiotic efflux	kdpDE	GTGACAAACGTTCTGATTGTTGAAGATGAACAGGCCATCCGCCGCTTTCTGCGCGCCGCGCTGGAAGGCGACGGCCTGCGCGTGTATGAAGCTGAAACATTACAACGTGGTTTACTGGAAGCCGCCACGCGAAAGCCCGATCTGATTATTCTCGATCTCGGCCTGCCGGACGGCGACGGAATCGATTTCATTCGCGACCTGCGTCAGTGGAGCGCAATACCGGTGATTGTCCTTTCCGCCCGCAGCGAAGAAAGCGATAAGATTGCCGCGCTTGACGCCGGAGCTGATGATTACCTGAGCAAGCCATTCGGCATTGGCGAGTTGCAGGCGCGTTTGCGTGTCGCGCTGCGACGGCACGCCGCCAGCCCTAGCGCCGATCCGATCGTCCGTTTTTCCGGC…	MTNVLIVEDEQAIRRFLRAALEGDGLRVYEAETLQRGLLEAATRKPDLIILDLGLPDGDGIDFIRDLRQWSAIPVIVLSARSEESDKIAALDAGADDYLSKPFGIGELQARLRVALRRHAASPSADPIVRFSGVTVDLAARLIHRGDEEIHLTPIEFRLLAVLLNNTGKVLTQRQLLNQVWGPNAVEHSHYLRIYMGHLRQKLEQDPTRPRHFITETGIGYRFMP	MTNVLIVEDEQAIRRFLRTALEGDGMRVFEAETLQRGLLEAATRKPDLIILDLGLPDGDGIEFIRDLRQWSAVPVIVLSARSEESDKIAALDAGADDYLSKPFGIGELQARLRVALRRHSATTAPDPLVKFSDVTVDLAARVIHRGEEEVHLTPIEFRLLAVLLNNAGKVLTQRQLLNQVWGPNAVEHSHYLRIYMGHLRQKLEQDPARPRHFITETGIGYRFML	100	gnl|BL_ORD_ID|2101|hsp_num:0	2331			0	672	kanamycin A
	1_3232 # 3406630 # 3407823 # 1 # ID=1_3232;partial=00;start_type=ATG;rbs_motif=GAGG;rbs_spacer=7bp;gc_cont=0.554	1_3232	3406630	3407823	+	Strict	670	691	Escherichia coli acrA	91.69	3004043	protein homolog model	n/a	n/a	fluoroquinolone antibiotic; cephalosporin; glycylcycline; penam; tetracycline antibiotic; rifamycin antibiotic; phenicol antibiotic; disinfecting agents and antiseptics	antibiotic efflux	resistance-nodulation-cell division (RND) antibiotic efflux pump	ATGAACAAAAACAGAGGGTTAACGCCTCTGGCGGTCGTTCTGATGCTCTCAGGCAGCTTAGCGCTAACAGGATGTGACGACAAACAGGACCAGCAAGGCGGCCAGCAGATGCCAGAAGTTGGAGTTGTCACACTAAAAACGGAACCACTGCAAATCACAACTGAACTTCCGGGTCGTACCGTTGCTTACCGTATCGCCGAAGTTCGCCCACAGGTAAGCGGCATTATCCTGAAGCGTAATTTCGTTGAGGGAAGTGATATCGAAGCGGGAGTCTCTCTCTATCAGATTGATCCTGCGACCTACCAGGCGACTTACGACAGCGCTAAGGGCGATCTGGCAAAAGCGCAGGCCGCCGCGAATATCGCTGAACTGACGGTGAAGCGTTATCAAAAGCTGCTG…	MNKNRGLTPLAVVLMLSGSLALTGCDDKQDQQGGQQMPEVGVVTLKTEPLQITTELPGRTVAYRIAEVRPQVSGIILKRNFVEGSDIEAGVSLYQIDPATYQATYDSAKGDLAKAQAAANIAELTVKRYQKLLGTQYISKQEYDQALADAQQATAAVVAAKAAVETARINLAYTKVTSPISGRIGKSSVTEGALVQNGQASALATVQQLDPIYVDVTQSSNDFLRLKQELANGSLKQENGKAKVDLVTSDGIKFPQSGTLEFSDVTVDQTTGSITLRAIFPNPDHTLLPGMFVRARLQEGTKPTALLVPQQGVTRTPRGDATVLVVGADNKVETRQIVASQAIGDKWLVTDGLKAGDRVVVSGLQKVRPGAQVKVQEITADNKQQAASGDQPAQPRS	MNKNRGFTPLAVVLMLSGSLALTGCDDKQAQQGGQQMPAVGVVTVKTEPLQITTELPGRTSAYRIAEVRPQVSGIILKRNFKEGSDIEAGVSLYQIDPATYQATYDSAKGDLAKAQAAANIAQLTVNRYQKLLGTQYISKQEYDQALADAQQANAAVTAAKAAVETARINLAYTKVTSPISGRIGKSNVTEGALVQNGQATALATVQQLDPIYVDVTQSSNDFLRLKQELANGTLKQENGKAKVSLITSDGIKFPQDGTLEFSDVTVDQTTGSITLRAIFPNPDHTLLPGMFVRARLEEGLNPNAILVPQQGVTRTPRGDATVLVVGADDKVETRPIVASQAIGDKWLVTEGLKAGDRVVISGLQKVRPGVQVKAQEVTADNNQQAASGAQPEQSKS	100	gnl|BL_ORD_ID|2319|hsp_num:0	2661			0	1191	tigecycline; tetracycline; rifampin; chloramphenicol; ampicillin; cefalotin; triclosan
	1_3233 # 3407846 # 3410995 # 1 # ID=1_3233;partial=00;start_type=ATG;rbs_motif=AGGAG;rbs_spacer=10bp;gc_cont=0.543	1_3233	3407846	3410995	+	Strict	1900	1902.5	acrB	94.66	3000216	protein homolog model	n/a	n/a	fluoroquinolone antibiotic; cephalosporin; glycylcycline; penam; tetracycline antibiotic; rifamycin antibiotic; phenicol antibiotic; disinfecting agents and antiseptics	antibiotic efflux	resistance-nodulation-cell division (RND) antibiotic efflux pump	ATGCCTAATTTCTTTATCGATCGCCCTATATTTGCGTGGGTGATCGCCATCATCATCATGTTGGCAGGGGGGCTCGCGATCCTCAAATTGCCGGTAGCGCAATATCCGACGATTGCGCCACCAGCAGTGACGATCTCCGCAACCTACCCTGGCGCTGATGCGAAAACGGTACAGGATACCGTCACGCAGGTTATCGAACAGAATATGAACGGTATCGATAACCTGATGTATATGTCCTCCAACAGTGACTCCACGGGGACCGTGCAGATCACGCTGACCTTTGAATCCGGCACCGATGCGGATATCGCGCAGGTTCAGGTTCAGAACAAGTTGCAACTGGCAATGCCTTTACTTCCCCAGGAAGTACAGCAACAGGGCGTGAGCGTTGAGAAGTCCTCA…	MPNFFIDRPIFAWVIAIIIMLAGGLAILKLPVAQYPTIAPPAVTISATYPGADAKTVQDTVTQVIEQNMNGIDNLMYMSSNSDSTGTVQITLTFESGTDADIAQVQVQNKLQLAMPLLPQEVQQQGVSVEKSSSSFLMVVGVINTDGTMTQEDISDYVAANMKDPISRTSGVGDVQLFGSQYAMRIWMNPTELTKYQLTPVDVINAIKAQNAQVAAGQLGGTPPVKGQQLNASIIAQTRLTSTDEFGKILLKVNQDGSQVRLRDVAKIELGGENYDVIAKFNGQPASGLGIKLATGANALDTATAIRAELKKMEPFFPPGMKIVYPYDTTPFVKISIHEVVKTLVEAIILVFLVMYLFLQNFRATLIPTIAVPVVLLGTFAVLAAFGFSINTLTMFGMV…	MPNFFIDRPIFAWVIAIIIMLAGGLAILKLPVAQYPTIAPPAVTISASYPGADAKTVQDTVTQVIEQNMNGIDNLMYMSSNSDSTGTVQITLTFESGTDADIAQVQVQNKLQLAMPLLPQEVQQQGVSVEKSSSSFLMVVGVINTDGTMTQEDISDYVAANMKDAISRTSGVGDVQLFGSQYAMRIWMNPNELNKFQLTPVDVITAIKAQNAQVAAGQLGGTPPVKGQQLNASIIAQTRLTSTEEFGKILLKVNQDGSRVLLRDVAKIELGGENYDIIAEFNGQPASGLGIKLATGANALDTAAAIRAELAKMEPFFPSGLKIVYPYDTTPFVKISIHEVVKTLVEAIILVFLVMYLFLQNFRATLIPTIAVPVVLLGTFAVLAAFGFSINTLTMFGMV…	100	gnl|BL_ORD_ID|1011|hsp_num:0	1104			0	3144	tigecycline; acriflavine; tetracycline; rifampin; chloramphenicol; ampicillin; cefalotin; triclosan
	1_3328 # 3505576 # 3506688 # 1 # ID=1_3328;partial=00;start_type=ATG;rbs_motif=None;rbs_spacer=None;gc_cont=0.517	1_3328	3505576	3506688	+	Strict	250	261.2	vanG	38.87	3002909	protein homolog model	n/a	n/a	glycopeptide antibiotic	antibiotic target alteration	glycopeptide resistance gene cluster; Van ligase	ATGGAATGGGTTTTTAAGATGGCGAAATTGCGGGTAGGAATAGTATTTGGCGGTAAGTCGGCGGAACATGAAGTGTCTTTGCAATCAGCGAAAAATATCGTTGATGCGATCGATAAAACCCGCTTCGACGTGGTGCTGTTAGGGATAGATAAGGCGGGACAATGGCATGTTAACGATGCGGAAAATTATTTGCAGAATGCAGACGATCCGGCACATATCGCGCTACGTCCTTCGGCAATCAGTCTGGCCCAGGTGCCTGGCAAACATCAACACCAATTGATTAACGCCCAGAACGGGCAGCCGCTACCGACGGTAGATGTTATTTTTCCTATCGTCCACGGTACGCTGGGCGAAGACGGCTCATTGCAGGGGATGCTGCGCGTCGCAAACTTACCGTTT…	MEWVFKMAKLRVGIVFGGKSAEHEVSLQSAKNIVDAIDKTRFDVVLLGIDKAGQWHVNDAENYLQNADDPAHIALRPSAISLAQVPGKHQHQLINAQNGQPLPTVDVIFPIVHGTLGEDGSLQGMLRVANLPFVGSDVLSSAACMDKDIAKRLLRDAGLNIAPFITLTRTNRHAFSFAEVESRLGLPLFVKPANQGSSVGVSKVANEAQYQQAVALAFEFDHKVVVEQGIKGREIECAVLGNDNPQASTCGEIVLNSEFYAYDTKYIDDNGAQVVVPAQLPSGVNDKIRAIAIQAYQTLGCAGMARVDVFLTADNEVVINEINTLPGFTNISMYPKLWQASGLGYTDLISRLIELALERHTANNALKTTM	MQNKKIAVIFGGNSTEYEVSLQSASAVFENINTNKFDIIPIGITRSGEWYHYTGEKEKILNNTWFEDSKNLCPVVVSQNRSVKGFLEIASDKYRIIKVDLVFPVLHGKNGEDGTLQGIFELAGIPVVGCDTLSSALCMDKDRAHKLVSLAGISVPKSVTFKRFNEEAAMKEIEANLTYPLFIKPVRAGSSFGITKVIEKQELDAAIELAFEHDTEVIVEETINGFEVGCAVLGIDELIVGRVDEIELSSGFFDYTEKYTLKSSKIYMPARIDAEAEKRIQEAAVTIYKALGCSGFSRVDMFYTPSGEIVFNEVNTIPGFTSHSRYPNMMKGIGLSFSQMLDKLIGLYVE	106.02	gnl|BL_ORD_ID|1069|hsp_num:0	1157			0	1047	vancomycin
	1_3354 # 3538984 # 3539448 # -1 # ID=1_3354;partial=00;start_type=ATG;rbs_motif=AGGAG;rbs_spacer=7bp;gc_cont=0.544	1_3354	3538984	3539448	-	Perfect	290	310.1	golS	100	3000504	protein homolog model	n/a	n/a	monobactam; carbapenem; cephalosporin; cephamycin; penam; phenicol antibiotic; penem	antibiotic efflux	resistance-nodulation-cell division (RND) antibiotic efflux pump	ATGAACATCGGTAAAGCAGCTAAAGCATCGAAAGTCTCGGCCAAAATGATTCGCTACTATGAACAGATTGGTCTGATTCCCGCGGCAAGTCGGACGGATTCCGGCTATCGGGCCTATACCCAGGCTGATGTTAATCAATTGCATTTTATACGCCGCGCGCGCGACCTCGGTTTTTCAGTTGCTGAAATCAGCGACTTACTGAATCTTTGGAATAACCAGTCGCGGCAAAGCGCTGACGTCAAACGCCTGGCGCAGACGCACATTGATGAACTGGACAGACGTATCCAGAACATGCAGCACATGGCGCAAACCCTCAAAGCGCTGATTCACTGCTGCGCCGGCGACGCGCTGCCAGATTGTCCCATTCTGCATACGCTTGGACAACCTGACGATAGCGAG…	MNIGKAAKASKVSAKMIRYYEQIGLIPAASRTDSGYRAYTQADVNQLHFIRRARDLGFSVAEISDLLNLWNNQSRQSADVKRLAQTHIDELDRRIQNMQHMAQTLKALIHCCAGDALPDCPILHTLGQPDDSEPEARTGAVLRRPRRHGLAKRL	MNIGKAAKASKVSAKMIRYYEQIGLIPAASRTDSGYRAYTQADVNQLHFIRRARDLGFSVAEISDLLNLWNNQSRQSADVKRLAQTHIDELDRRIQNMQHMAQTLKALIHCCAGDALPDCPILHTLGQPDDSEPEARTGAVLRRPRRHGLAKRL	100	gnl|BL_ORD_ID|36|hsp_num:0	44			0	462	chloramphenicol
	1_3357 # 3543248 # 3546415 # 1 # ID=1_3357;partial=00;start_type=ATG;rbs_motif=AGG;rbs_spacer=10bp;gc_cont=0.567	1_3357	3543248	3546415	+	Strict	750	1209.9	adeF	60.67	3000777	protein homolog model	n/a	n/a	fluoroquinolone antibiotic; tetracycline antibiotic	antibiotic efflux	resistance-nodulation-cell division (RND) antibiotic efflux pump	ATGAAATTCACCCACTTTTTCATTGCACGACCCATCTTCGCCATCGTCCTGTCGCTGTTAATGCTGCTGGCTGGCGCTATCGCCTTTTTAAAACTGCCGCTGAGTGAATATCCGGCCGTTACGCCGCCCACGGTACAGGTTAGCGCCAGCTACCCCGGCGCTAACCCGCAAGTGATTGCCGATACGGTAGCCGCGCCGCTGGAACAGGTGATCAACGGCGTTGACGGCATGTTGTATATGAATACCCAGATGGCCATTGATGGTCGCATGGTTATCTCTATCGCCTTCGAACAGGGAACCGATCCTGATATGGCGCAAATTCAGGTGCAAAACCGGGTATCCCGCGCGCTGCCTCGCCTGCCCGAAGAAGTCCAGCGAATTGGCGTTGTAACGGAGAAA…	MKFTHFFIARPIFAIVLSLLMLLAGAIAFLKLPLSEYPAVTPPTVQVSASYPGANPQVIADTVAAPLEQVINGVDGMLYMNTQMAIDGRMVISIAFEQGTDPDMAQIQVQNRVSRALPRLPEEVQRIGVVTEKTSPDMLMVVHLVSPQKRYDSLYLSNFAIRQVRDELARLPGVGDVLVWGAGEYAMRVWLDPAKIANRGLTASDIVTALREQNVQVAAGSVGQQPEASAAFQMTVNTLGRLTSEEQFGEIVVKIGADGEVTRLRDVARVTLGADAYTLRSLLNGEAAPALQIIQSPGANAIDVSNAIRGKMDELQQNFPQDIEYRIAYDPTVFVRASLQSVAITLLEALVLVVLVVVLFLQTWRASIIPLVAVPVSLVGTFALMHLFGFSLNTLSLFG…	MNISKFFIDRPIFAGVLSVLILLAGLLSVFQLPISEYPEVVPPSVVVRAQYPGANPKVIAETVASPLEESINGVEDMLYMQSQANSDGNLTITVNFKLGIDPDKAQQLVQNRVSQAMPRLPEDVQRLGVTTLKSSPTLTMVVHLTSPDNRYDMTYLRNYAVLNVKDRLARLQGVGEVGLFGSGDYAMRVWLDPQKVAQRNLTATEIVNAIREQNIQVAAGTIGASPSNSPLQLSVNAQGRLTTEQEFADIILKTAPDGAVTRLGDVARVELAASQYGLRSLLDNKQAVAIPIFQAPGANALQVSDQVRSTMKELSKDFPSSIKYDIVYDPTQFVRASIKAVVHTLLEAITLVVVVVILFLQTWRASIIPLLAVPVSIIGTFALMLAFGYSINALSLFGM…	99.62	gnl|BL_ORD_ID|133|hsp_num:0	153			0	3126	tetracycline
	1_3572 # 3784416 # 3785360 # -1 # ID=1_3572;partial=00;start_type=ATG;rbs_motif=GGAG;rbs_spacer=6bp;gc_cont=0.476	1_3572	3784416	3785360	-	Strict	500	562	leuO	86.62	3003843	protein homolog model	n/a	n/a	nucleoside antibiotic; disinfecting agents and antiseptics	antibiotic efflux	major facilitator superfamily (MFS) antibiotic efflux pump	ATGCCAGAGGTCAAAACCGAAAAGCCGCATCTTTTAGATATGGGCAAACCACAGCTTCGCATGGTTGATTTGAACCTATTGACCGTGTTCGATGCGGTAATGCAAGAGCAGAATATTACGCGCGCCGCCCACACGCTGGGAATGTCGCAGCCTGCGGTCAGTAACGCCGTAGCGCGTCTGAAGGTTATGTTTAATGACGAACTTTTTGTTCGATATGGACGAGGAATTCAGCCGACTGCCCGTGCATTTCAGTTATTTGGTTCAGTCCGTCAGGCGTTACAATTGGTGCAAAATGAATTGCCGGGATCGGGGTTTGAGCCGACCAGCAGCGAACGTGTATTCAATCTTTGCGTGTGCAGTCCGCTGGATAATATCCTGACGTCACAGATTTATAATCGT…	MPEVKTEKPHLLDMGKPQLRMVDLNLLTVFDAVMQEQNITRAAHTLGMSQPAVSNAVARLKVMFNDELFVRYGRGIQPTARAFQLFGSVRQALQLVQNELPGSGFEPTSSERVFNLCVCSPLDNILTSQIYNRVEKIAPNIHVVFKASLNQNTEHQLRYQETEFVISYEEFRRPEFTSVPLFKDEMVLVASRKHPRISGPLLEGDVYNEQHAVVSLDRYASFSQPWYDTPDKQSSVAYQGMVLISVLNVVSQTHLVAIAPRWLAEEFAESLDLQILPLPLKLNSRTCYLSWHEAAGRDKGHQWMEDLLVSVCKR	MPEVQTDHPETAELSKPQLRMVDLNLLTVFDAVMQEQNITRAAHALGMSQPAVSNAVARLKVMFNDELFVRYGRGIQPTARAFQLFGSVRQALQLVQNELPGSGFEPASSERVFHLCVCSPLDSILTSQIYNHIEQIAPNIHVMFKSSLNQNTEHQLRYQETEFVISYEDFHRPEFTSVPLFKDEMVLVASKNHPTIKGPLLKHDVYNEQHAAVSLDRFASFSQTWYDTVDKQASIAYQGMAMMSVLSVVSQTHLVAIAPRWLAEEFAESLELQVLPLPLKQNSRTCYLSWHEAAGRDKGHQWMEEQLVSICKR	100	gnl|BL_ORD_ID|4919|hsp_num:0	5921			0	942	acriflavine; puromycin
	3_11 # 7019 # 7879 # -1 # ID=3_11;partial=00;start_type=ATG;rbs_motif=AGGA;rbs_spacer=5bp;gc_cont=0.490	3_11	7019	7879	-	Perfect	500	571.2	TEM-135	100	3000999	protein homolog model	n/a	n/a	monobactam; cephalosporin; penam; penem	antibiotic inactivation	TEM beta-lactamase	ATGAGTATTCAACATTTTCGTGTCGCCCTTATTCCCTTTTTTGCGGCATTTTGCCTTCCTGTTTTTGCTCACCCAGAAACGCTGGTGAAAGTAAAAGATGCTGAAGATCAGTTGGGTGCACGAGTGGGTTACATCGAACTGGATCTCAACAGCGGTAAGATCCTTGAGAGTTTTCGCCCCGAAGAACGTTTTCCAATGATGAGCACTTTTAAAGTTCTGCTATGTGGTGCGGTATTATCCCGTGTTGACGCCGGGCAAGAGCAACTCGGTCGCCGCATACACTATTCTCAGAATGACTTGGTTGAGTACTCACCAGTCACAGAAAAGCATCTTACGGATGGCATGACAGTAAGAGAATTATGCAGTGCTGCCATAACCATGAGTGATAACACTGCTGCC…	MSIQHFRVALIPFFAAFCLPVFAHPETLVKVKDAEDQLGARVGYIELDLNSGKILESFRPEERFPMMSTFKVLLCGAVLSRVDAGQEQLGRRIHYSQNDLVEYSPVTEKHLTDGMTVRELCSAAITMSDNTAANLLLTTIGGPKELTAFLHNMGDHVTRLDRWEPELNEAIPNDERDTTTPAAMATTLRKLLTGELLTLASRQQLIDWMEADKVAGPLLRSALPAGWFIADKSGAGERGSRGIIAALGPDGKPSRIVVIYTTGSQATMDERNRQIAEIGASLIKHW	MSIQHFRVALIPFFAAFCLPVFAHPETLVKVKDAEDQLGARVGYIELDLNSGKILESFRPEERFPMMSTFKVLLCGAVLSRVDAGQEQLGRRIHYSQNDLVEYSPVTEKHLTDGMTVRELCSAAITMSDNTAANLLLTTIGGPKELTAFLHNMGDHVTRLDRWEPELNEAIPNDERDTTTPAAMATTLRKLLTGELLTLASRQQLIDWMEADKVAGPLLRSALPAGWFIADKSGAGERGSRGIIAALGPDGKPSRIVVIYTTGSQATMDERNRQIAEIGASLIKHW	100	gnl|BL_ORD_ID|1558|hsp_num:0	1697			0	858	penicillin; ampicillin
	1_54 # 57532 # 58923 # 1 # ID=1_54;partial=00;start_type=ATG;rbs_motif=AGGAG;rbs_spacer=6bp;gc_cont=0.552	1_54	57532	58923	+	Strict	850	867.1	Escherichia coli UhpT with mutation conferring resistance to fosfomycin	95.68	3003890	protein variant model	E350Q	n/a	phosphonic acid antibiotic	antibiotic target alteration	antibiotic-resistant UhpT	ATGCTGGCCTTCTTAAACCAGGTGCGCAAGCCGACCCTGGATCTGCCGCTCGATGTGCGGCGTAAAATGTGGTTCAAGCCGTTCATGCAGTCCTATCTGGTGGTTTTTATCGGCTACCTGACCATGTACCTGATCCGCAAAAACTTTAACATCGCGCAGAACGACATGATTTCTACCTACGGGTTGAGCATGACCGAGCTGGGGATGATTGGCCTGGGCTTCTCGATCACCTACGGCGTGGGGAAAACGCTGGTTTCCTACTACGCTGACGGTAAAAATACCAAGCAGTTTCTACCGTTTATGTTGATCCTCTCCGCTATCTGTATGCTCGGCTTCAGCGCCAGCATGGGCGCGGGGTCAACCAGTCTGTTTCTGATGATCGCTTTCTATGCCCTGAGC…	MLAFLNQVRKPTLDLPLDVRRKMWFKPFMQSYLVVFIGYLTMYLIRKNFNIAQNDMISTYGLSMTELGMIGLGFSITYGVGKTLVSYYADGKNTKQFLPFMLILSAICMLGFSASMGAGSTSLFLMIAFYALSGFFQSTGGSCSYSTITKWTPRRKRGTFLGFWNISHNLGGAGAAGVALFGANYLFDGHVIGMFIFPSIIALIVGFIGLRFGSDSPESYGLGKAEELFGEEISEEDKETEENEMTKWQIFVEYVLKNKVIWLLCFSNIFLYVVRIGIDQWSTVYAFQELKLSKEVAIQGFTLFEVGALVGTLLWGWLSDLANGRRALVACVALALIIATLGVYQHASNQYVYLASLFALGFLVFGPQLLIGVAAVGFVPKKAIGAADGIKGTFAYLIG…	MLAFLNQVRKPTLDLPLEVRRKMWFKPFMQSYLVVFIGYLTMYLIRKNFNIAQNDMISTYGLSMTQLGMIGLGFSITYGVGKTLVSYYADGKNTKQFLPFMLILSAICMLGFSASMGSGSVSLFLMIAFYALSGFFQSTGGSCSYSTITKWTPRRKRGTFLGFWNISHNLGGAGAAGVALFGANYLFDGHVIGMFIFPSIIALIVGFIGLRYGSDSPESYGLGKAEELFGEEISEEDKETESTDMTKWQIFVEYVLKNKVIWLLCFANIFLYVVRIGIDQWSTVYAFQELKLSKAVAIQGFTLFEAGALVGTLLWGWLSDLANGRRGLVACIALALIIATLGVYQHASNEYIYLASLFALGFLVFGPQLLIGVAAVGFVPKKAIGAADGIKGTFAYLIG…	100	gnl|BL_ORD_ID|2126|hsp_num:0	2373			0	1389	fosfomycin
	1_390 # 438579 # 439763 # 1 # ID=1_390;partial=00;start_type=GTG;rbs_motif=AGGA;rbs_spacer=8bp;gc_cont=0.542	1_390	438579	439763	+	Strict	700	786.9	Escherichia coli EF-Tu mutants conferring resistance to Pulvomycin	99.49	3003369	protein variant model	R234F	n/a	elfamycin antibiotic	antibiotic target alteration	elfamycin resistant EF-Tu	GTGTCTAAAGAAAAATTTGAACGTACAAAACCGCACGTTAACGTCGGCACCATCGGCCACGTTGACCACGGTAAAACTACCCTGACCGCTGCAATCACCACCGTACTGGCTAAAACCTACGGCGGTGCTGCTCGTGCATTCGACCAGATCGATAACGCGCCGGAAGAAAAAGCGCGTGGTATCACCATCAACACTTCTCACGTTGAATACGATACCCCGACCCGCCACTACGCACACGTAGACTGCCCGGGGCACGCCGACTATGTTAAAAACATGATCACCGGTGCTGCTCAGATGGACGGCGCGATTCTGGTTGTTGCTGCGACTGACGGCCCGATGCCGCAGACCCGTGAGCACATCCTGCTGGGTCGTCAGGTAGGCGTTCCGTACATCATCGTG…	MSKEKFERTKPHVNVGTIGHVDHGKTTLTAAITTVLAKTYGGAARAFDQIDNAPEEKARGITINTSHVEYDTPTRHYAHVDCPGHADYVKNMITGAAQMDGAILVVAATDGPMPQTREHILLGRQVGVPYIIVFLNKCDMVDDEELLELVEMEVRELLSQYDFPGDDTPIVRGSALKALEGDAEWEAKIIELAGFLDSYIPEPERAIDKPFLLPIEDVFSISGRGTVVTGRVERGIIKVGEEVEIVGIKETQKSTCTGVEMFRKLLDEGRAGENVGVLLRGIKREEIERGQVLAKPGTIKPHTKFESEVYILSKDEGGRHTPFFKGYRPQFYFRTTDVTGTIELPEGVEMVMPGDNIKMVVTLIHPIAMDDGLRFAIREGGRTVGAGVVAKVLG	MLSPEGESTIVRNIAVSKEKFERTKPHVNVGTIGHVDHGKTTLTAAITTVLAKTYGGAARAFDQIDNAPEEKARGITINTSHVEYDTPTRHYAHVDCPGHADYVKNMITGAAQMDGAILVVAATDGPMPQTREHILLGRQVGVPYIIVFLNKCDMVDDEELLELVEMEVRELLSQYDFPGDDTPIVRGSALKALEGDAEWEAKILELAGFLDSYIPEPERAIDKPFLLPIEDVFSISGRGTVVTGRVERGIIKVGEEVEIVGIKETQKSTCTGVEMFRKLLDEGRAGENVGVLLRGIKREEIERGQVLAKPGTIKPHTKFESEVYILSKDEGGRHTPFFKGYRPQFYFRTTDVTGTIELPEGVEMVMPGDNIKMVVTLIHPIAMDDGLRFAIREGGRTV…	96.33	gnl|BL_ORD_ID|1969|hsp_num:0	2158			45	1227	pulvomycin
	1_1411 # 1535600 # 1536958 # 1 # ID=1_1411;partial=00;start_type=ATG;rbs_motif=GGAG;rbs_spacer=8bp;gc_cont=0.548	1_1411	1535600	1536958	+	Strict	850	898.7	Escherichia coli GlpT with mutation conferring resistance to fosfomycin	96.9	3003889	protein variant model	E448K	n/a	phosphonic acid antibiotic	antibiotic target alteration	antibiotic-resistant GlpT	ATGTTGAGTATTTTTAAACCAGCGCCGCATAAAGCGCGCTTGCCAGCGGCGGAGATTGATCCGACCTATCGCCGATTACGCTGGCAGATTTTCCTGGGGATATTCTTTGGCTATGCCGCGTATTATCTGGTGCGCAAGAACTTTGCCCTCGCGATGCCCTACCTGGTAGAACAGGGTTTTTCACGCGGCGATCTGGGCTTTGCGTTGTCCGGGATTTCCATCGCTTATGGTTTTTCGAAATTTATAATGGGTTCGGTGTCCGATCGCTCGAATCCGCGCGTTTTTCTGCCGGCAGGGTTGATTCTGGCCGCAGCAGTCATGTTGTTTATGGGCTTTGTGCCGTGGGCGACATCCAGCATCGCCGTGATGTTTGTGCTGTTGTTCCTTTGCGGCTGGTTC…	MLSIFKPAPHKARLPAAEIDPTYRRLRWQIFLGIFFGYAAYYLVRKNFALAMPYLVEQGFSRGDLGFALSGISIAYGFSKFIMGSVSDRSNPRVFLPAGLILAAAVMLFMGFVPWATSSIAVMFVLLFLCGWFQGMGWPPCGRTMVHWWSQKERGGIVSVWNCAHNVGGGIPPLLFLLGMAWFNDWKAALYMPAFGAIVVALFAFAMMRDTPQSCGLPPIEEYKNDYPDDYNEKAEEELTAKQIFMQYVLPNKLLWYIAIANVFVYLLRYGILDWSPTYLKEVKHFALDKSSWAYFLYEYAGIPGTLLCGWMSDKVFRGNRGATGVFFMTLVTIATIVYWMNPAGNPNVDMACMIIIGFLIYGPVMLIGLHALELAPKKAAGTAAGFTGLFGYLGGSVA…	MLSIFKPAPHKARLPAAEIDPTYRRLRWQIFLGIFFGYAAYYLVRKNFALAMPYLVEQGFSRGDLGFALSGISIAYGFSKFIMGSVSDRSNPRVFLPAGLILAAAVMLFMGFVPWATSSIAVMFVLLFLCGWFQGMGWPPCGRTMVHWWSQKERGGIVSVWNCAHNVGGGIPPLLFLLGMAWFNDWHAALYMPAFCAILVALFAFAMMRDTPQSCGLPPIEEYKNDYPDDYNEKAEQELTAKQIFMQYVLPNKLLWYIAIANVFVYLLRYGILDWSPTYLKEVKHFALDKSSWAYFLYEYAGIPGTLLCGWMSDKVFRGNRGATGVFFMTLVTIATIVYWMNPAGNPTVDMICMIVIGFLIYGPVMLIGLHALELAPKKAAGTAAGFTGLFGYLGGSVA…	100	gnl|BL_ORD_ID|2127|hsp_num:0	2372			0	1356	fosfomycin
	1_1422 # 1549216 # 1551852 # 1 # ID=1_1422;partial=00;start_type=ATG;rbs_motif=GGA;rbs_spacer=10bp;gc_cont=0.559	1_1422	1549216	1551852	+	Strict	1500	1679.5	Salmonella enterica gyrA conferring resistance to fluoroquinolones	99.89	3003926	protein variant model	D87Y	D87Y:1545	fluoroquinolone antibiotic	antibiotic target alteration	fluoroquinolone resistant gyrA	ATGAGCGACCTTGCGAGAGAAATTACACCGGTCAACATTGAGGAAGAGCTGAAAAGCTCCTATCTGGATTATGCGATGTCGGTCATTGTTGGCCGTGCGCTGCCGGATGTCCGAGATGGCCTGAAGCCGGTACACCGTCGCGTACTTTACGCCATGAACGTATTGGGCAATGACTGGAACAAAGCCTATAAAAAATCTGCCCGTGTCGTTGGTGACGTAATCGGTAAATACCATCCCCACGGCGATTCCGCAGTGTATTACACCATCGTTCGTATGGCGCAGCCATTCTCGCTGCGTTACATGCTGGTGGATGGTCAGGGTAACTTCGGTTCTATTGACGGCGACTCCGCGGCGGCAATGCGTTATACGGAGATCCGTCTGGCGAAAATCGCCCACGAA…	MSDLAREITPVNIEEELKSSYLDYAMSVIVGRALPDVRDGLKPVHRRVLYAMNVLGNDWNKAYKKSARVVGDVIGKYHPHGDSAVYYTIVRMAQPFSLRYMLVDGQGNFGSIDGDSAAAMRYTEIRLAKIAHELMADLEKETVDFVDNYDGTEKIPDVMPTKIPNLLVNGSSGIAVGMATNIPPHNLTEVINGCLAYIDNEDISIEGLMEHIPGPDFPTAAIINGRRGIEEAYRTGRGKVYIRARAEVEADAKTGRETIIVHEIPYQVNKARLIEKIAELVKDKRVEGISALRDESDKDGMRIVIEVKRDAVGEVVLNNLYSQTQLQVSFGINMVALHHGQPKIMNLKDIISAFVRHRREVVTRRTIFELRKARDRAHILEALAIALANIDPIIELIRR…	MSDLAREITPVNIEEELKSSYLDYAMSVIVGRALPDVRDGLKPVHRRVLYAMNVLGNDWNKAYKKSARVVGDVIGKYHPHGDSAVYDTIVRMAQPFSLRYMLVDGQGNFGSIDGDSAAAMRYTEIRLAKIAHELMADLEKETVDFVDNYDGTEKIPDVMPTKIPNLLVNGSSGIAVGMATNIPPHNLTEVINGCLAYIDNEDISIEGLMEHIPGPDFPTAAIINGRRGIEEAYRTGRGKVYIRARAEVEADAKTGRETIIVHEIPYQVNKARLIEKIAELVKDKRVEGISALRDESDKDGMRIVIEVKRDAVGEVVLNNLYSQTQLQVSFGINMVALHHGQPKIMNLKDIISAFVRHRREVVTRRTIFELRKARDRAHILEALAIALANIDPIIELIRR…	100	gnl|BL_ORD_ID|2156|hsp_num:0	2403			0	2634	ciprofloxacin; nalidixic acid
	1_3565 # 3776437 # 3778203 # -1 # ID=1_3565;partial=00;start_type=ATG;rbs_motif=AGGA;rbs_spacer=12bp;gc_cont=0.547	1_3565	3776437	3778203	-	Strict	500	564.7	Haemophilus influenzae PBP3 conferring resistance to beta-lactam antibiotics	51.85	3004446	protein variant model	D350N, S357N	n/a	cephalosporin; cephamycin; penam	antibiotic target alteration	Penicillin-binding protein mutations conferring resistance to beta-lactam antibiotics	ATGAAAGCAGCGGCAAAAACGCAAAAATCGAAACGCCAGGAAGAACAGACCAACTTCATCAGTTGGCGTTTTGCGTTGCTGTGCGGCTGTATTTTACTGGCGCTGGTTTTTTTACTTGGACGCGCGGCGTGGCTACAGATTATCGCCCCGGATATGCTGGTGCGTCAGGGCGATATGCGTTCGCTGCGTGTTCAGGAAGTCTCCACCTCACGCGGTATGATTACCGACCGTTCCGGGCGTCCACTGGCGGTCAGCGTACCGGTTAAGGCGATCTGGGCCGACCCGAAAGAAGTTCATGACGCCGGCGGCATCAGCGTTGGCGATCGCTGGAAAGCGCTTTCTACTGCGCTCAATATTCCGCTCGATCAGCTCTCCGCCCGTATCAACGCCAACCCGAAA…	MKAAAKTQKSKRQEEQTNFISWRFALLCGCILLALVFLLGRAAWLQIIAPDMLVRQGDMRSLRVQEVSTSRGMITDRSGRPLAVSVPVKAIWADPKEVHDAGGISVGDRWKALSTALNIPLDQLSARINANPKGRFIYLARQVNPDMADYIKKLKLPGIHLREESRRYYPSGEVTAHLIGFTNVDSQGIEGVEKSFDKWLTGQPGERIVRKDRYGRVIEDISSTDSQAAHNLALSIDERLQALVYRELNNAVAFNKAESGSAVLVDVNTGEVLAMANSPSYNPNNLAGTPKDAMRNRTITDVFEPGSTVKPMVVMTALQRGIVNENTVLNTVPYRINGHEIKDVARYSELTLTGVLQKSSNVGVSKLALAMPSSALVDTYSRFGLGKATNLGLVGERSG…	MVKFNSSRKSGKSKKTIRKLTAPETVKQNKPQKVFEKCFMRGRYMLSTVLILLGLCALVARAAYVQSINADTLSNEADKRSLRKDEVLSVRGSILDRNGQLLSVSVPMSAIVADPKTMLKENSLADKERIAALAEELGMTENDLVKKIEKNSKSGYLYLARQVELSKANYIRRLKIKGIILETEHRRFYPRVEEAAHVVGYTDIDGNGIEGIEKSFNSLLVGKDGSRTVRKDKRGNIVAHISDEKKYDAQDVTLSIDEKLQSMVYREIKKAVSENNAESGTAVLVDVRTGEVLAMATAPSYNPNNRVGVKSELMRNRAITDTFEPGSTVKPFVVLTALQRGVVKRDEIIDTTSFKLSGKEIVDVAPRAQQTLDEILMNSSNRGVSRLALRMPPSALMET…	96.39	gnl|BL_ORD_ID|2491|hsp_num:0	2886			63	1758	ceftriaxone; ampicillin; cefaclor; cefotaxime; cefditoren; cefdinir
	1_4096 # 4371328 # 4372512 # -1 # ID=1_4096;partial=00;start_type=ATG;rbs_motif=GAGG;rbs_spacer=8bp;gc_cont=0.540	1_4096	4371328	4372512	-	Strict	700	786.9	Escherichia coli EF-Tu mutants conferring resistance to Pulvomycin	99.49	3003369	protein variant model	R234F	n/a	elfamycin antibiotic	antibiotic target alteration	elfamycin resistant EF-Tu	ATGTCTAAAGAAAAGTTTGAACGTACAAAACCGCACGTTAACGTCGGTACTATCGGCCACGTTGACCATGGTAAAACAACGCTGACCGCTGCCATTACTACCGTACTGGCTAAAACCTACGGCGGTGCCGCCCGCGCATTCGACCAGATCGATAACGCGCCGGAAGAAAAAGCGCGTGGTATCACCATCAACACTTCTCACGTTGAATACGATACCCCGACCCGCCACTACGCACACGTAGACTGCCCGGGGCACGCCGACTATGTTAAAAACATGATCACCGGTGCTGCTCAGATGGACGGCGCGATTCTGGTTGTTGCTGCGACTGACGGCCCGATGCCGCAGACCCGTGAGCACATCCTGCTGGGTCGTCAGGTAGGCGTTCCGTACATCATCGTG…	MSKEKFERTKPHVNVGTIGHVDHGKTTLTAAITTVLAKTYGGAARAFDQIDNAPEEKARGITINTSHVEYDTPTRHYAHVDCPGHADYVKNMITGAAQMDGAILVVAATDGPMPQTREHILLGRQVGVPYIIVFLNKCDMVDDEELLELVEMEVRELLSQYDFPGDDTPIVRGSALKALEGDAEWEAKIIELAGFLDSYIPEPERAIDKPFLLPIEDVFSISGRGTVVTGRVERGIIKVGEEVEIVGIKETQKSTCTGVEMFRKLLDEGRAGENVGVLLRGIKREEIERGQVLAKPGTIKPHTKFESEVYILSKDEGGRHTPFFKGYRPQFYFRTTDVTGTIELPEGVEMVMPGDNIKMVVTLIHPIAMDDGLRFAIREGGRTVGAGVVAKVLG	MLSPEGESTIVRNIAVSKEKFERTKPHVNVGTIGHVDHGKTTLTAAITTVLAKTYGGAARAFDQIDNAPEEKARGITINTSHVEYDTPTRHYAHVDCPGHADYVKNMITGAAQMDGAILVVAATDGPMPQTREHILLGRQVGVPYIIVFLNKCDMVDDEELLELVEMEVRELLSQYDFPGDDTPIVRGSALKALEGDAEWEAKILELAGFLDSYIPEPERAIDKPFLLPIEDVFSISGRGTVVTGRVERGIIKVGEEVEIVGIKETQKSTCTGVEMFRKLLDEGRAGENVGVLLRGIKREEIERGQVLAKPGTIKPHTKFESEVYILSKDEGGRHTPFFKGYRPQFYFRTTDVTGTIELPEGVEMVMPGDNIKMVVTLIHPIAMDDGLRFAIREGGRTV…	96.33	gnl|BL_ORD_ID|1969|hsp_num:0	2158			45	1227	pulvomycin
	1_1549 # 1689763 # 1690485 # -1 # ID=1_1549;partial=00;start_type=ATG;rbs_motif=GAG;rbs_spacer=6bp;gc_cont=0.537	1_1549	1689763	1690485	-	Strict	450	456.8	baeR	94.14	3000828	protein overexpression model	n/a	n/a	aminoglycoside antibiotic; aminocoumarin antibiotic	antibiotic efflux	resistance-nodulation-cell division (RND) antibiotic efflux pump	ATGACTGAATTACCCATTGATGAAAACACGCCGCGCATTTTGATTGTTGAAGATGAACCCAAGCTGGGTCAGCTGCTTATTGACTACTTACGCGCGGCGAGTTACGCCCCCACGCTCATCAATCACGGCGACAAGGTACTGCCGTATGTGCGTCAAACGCCGCCGGATCTGATTCTGCTGGATCTGATGCTGCCGGGTACCGATGGTCTGACGCTATGCCGGGAGATTCGCCGTTTTTCCGACATCCCCATTGTGATGGTCACAGCCAAAATTGAAGAGATCGACCGGCTGCTGGGGCTGGAAATCGGCGCCGATGATTATATCTGTAAGCCTTACAGCCCGCGCGAAGTCGTGGCCCGCGTGAAAACCATTTTGCGCCGCTGTAAACCGCAGCGCGAA…	MTELPIDENTPRILIVEDEPKLGQLLIDYLRAASYAPTLINHGDKVLPYVRQTPPDLILLDLMLPGTDGLTLCREIRRFSDIPIVMVTAKIEEIDRLLGLEIGADDYICKPYSPREVVARVKTILRRCKPQRELQQQDAESPLMIDESRFQASWCGKALDLTPAEFRLLKTLSLEPGKVFSREQLLNHLYDDYRVVTDRTIDSHIKNLRRKLESLDAEQSFIRAVYGVGYRWEADACRLV	MTELPIDENTPRILIVEDEPKLGQLLIDYLRAASYAPSLISHGDQVLPYVRQTPPDLILLDLMLPGTDGLTLCREIRRFSDVPIVMVTAKIEEIDRLLGLEIGADDYICKPYSPREVVARVKTILRRCKPQRELQVLDAESPLIVDESRFQASWRSKLLDLTPAEFRLLKTLSHEPGKVFSREQLLNHLYDDYRVVTDRTIDSHIKNLRRKLEALDAEQSFIRAVYGVGYRWEADACRIA	100	gnl|BL_ORD_ID|1382|hsp_num:0	1337			0	717	neomycin; amikacin; kanamycin A; tobramycin; novobiocin; gentamicin
	1_2150 # 2287823 # 2288257 # -1 # ID=1_2150;partial=00;start_type=TTG;rbs_motif=None;rbs_spacer=None;gc_cont=0.474	1_2150	2287823	2288257	-	Strict	210	273.5	Escherichia coli AcrAB-TolC with MarR mutations conferring resistance to ciprofloxacin and tetracycline	92.36	3003378	protein overexpression model	n/a	n/a	fluoroquinolone antibiotic; cephalosporin; glycylcycline; penam; tetracycline antibiotic; rifamycin antibiotic; phenicol antibiotic; disinfecting agents and antiseptics	antibiotic target alteration; antibiotic efflux	resistance-nodulation-cell division (RND) antibiotic efflux pump	TTGAAAAGCACCAGTGATCTGTTCAATGAAATCATTCCGCTGGGTCGCTTGATCTACATGGTAAATCAAAAAAAAGATCGCCTGTTAAATAACTATTTATCCCCGCTGGATATCACCGCAACACAGTTTAAAGTGCTTTGCTCGATACGCTGCGCGGGATGTATTACCCCGGTTGAACTTAAAAAAGTGCTGTCTGTCGATCTCGGCGCATTGACGCGAATGCTCGACCGCCTGCTGTGCAAAGGCTGGATCGAAAGACTGCCGAATCCTAATGACAAACGCGGCGTACTGGTGAAGCTAACGCCGGACGGCGCGGCAATTTGTGAGCAATGTCATCAACGACCAGGGCAAGACCTGCATCAGGAATTAACAAAAAACTTAACGGCGGACGAAGTGGCA…	LKSTSDLFNEIIPLGRLIYMVNQKKDRLLNNYLSPLDITATQFKVLCSIRCAGCITPVELKKVLSVDLGALTRMLDRLLCKGWIERLPNPNDKRGVLVKLTPDGAAICEQCHQRPGQDLHQELTKNLTADEVATLEYLLKKILP	MKSTSDLFNEIIPLGRLIHMVNQKKDRLLNEYLSPLDITAAQFKVLCSIRCAACITPVELKKVLSVDLGALTRMLDRLVCKGWVERLPNPNDKRGVLVKLTTGGAAICEQCHQLVGQDLHQELTKNLTADEVATLEYLLKKVLP	100	gnl|BL_ORD_ID|1983|hsp_num:0	431			0	432	tigecycline; ciprofloxacin; tetracycline; rifampin; chloramphenicol; ampicillin; cefalotin; triclosan
	1_4000 # 4243160 # 4243618 # -1 # ID=1_4000;partial=00;start_type=ATG;rbs_motif=AGG;rbs_spacer=11bp;gc_cont=0.549	1_4000	4243160	4243618	-	Strict	300	300.4	Escherichia coli soxR with mutation conferring antibiotic resistance	96.05	3003381	protein overexpression model	n/a	n/a	fluoroquinolone antibiotic; cephalosporin; glycylcycline; penam; tetracycline antibiotic; rifamycin antibiotic; phenicol antibiotic; disinfecting agents and antiseptics	antibiotic target alteration; antibiotic efflux	ATP-binding cassette (ABC) antibiotic efflux pump; major facilitator superfamily (MFS) antibiotic efflux pump; resistance-nodulation-cell division (RND) antibiotic efflux pump	ATGGAAAAAAAATCTCCCCGTTTAAAAGCCTTACTGACGCCGGGGGAAGTTGCGAAACGTAGCGGTGTTGCTGTGTCCGCCCTGCACTTCTATGAAAGCAAAGGGCTAATTACCAGTATCCGTAATAGCGGTAACCAACGGCGATACAAGCGTGACGTGTTGCGTTATGTCGCGATTATCAAGATCGCCCAGCGTATCGGCATCCCGCTGGCAACTATCGGCGACGCGTTTGGTATCTTGCCGGAAGGACATACGTTAAGCGCGAAAGAGTGGAAGCAGCTCTCCTCGCAGTGGCGCGAAGAGTTAGACCGACGTATTCATACGCTGGTGGCGTTGCGCGATGAGCTGGACGGTTGTATCGGCTGCGGCTGTTTATCGCGTAGCGACTGTCCGCTGCGA…	MEKKSPRLKALLTPGEVAKRSGVAVSALHFYESKGLITSIRNSGNQRRYKRDVLRYVAIIKIAQRIGIPLATIGDAFGILPEGHTLSAKEWKQLSSQWREELDRRIHTLVALRDELDGCIGCGCLSRSDCPLRNPGDRLGEHGTGARLLEDD	MEKKLPRIKALLTPGEVAKRSGVAVSALHFYESKGLITSIRNSGNQRRYKRDVLRYVAIIKIAQRIGIPLATIGEAFGVLPEGHTLSAKEWKQLSSQWREELDRRIHTLVALRDELDGCIGCGCLSRSDCPLRNPGDRLGEEGTGARLLEDEQN	98.7	gnl|BL_ORD_ID|1972|hsp_num:0	1005			0	456	tigecycline; ciprofloxacin; tetracycline; rifampin; chloramphenicol; ampicillin; nalidixic acid; norfloxacin; cefalotin; triclosan
	1_4001 # 4243705 # 4244028 # 1 # ID=1_4001;partial=00;start_type=ATG;rbs_motif=GAGG;rbs_spacer=7bp;gc_cont=0.515	1_4001	4243705	4244028	+	Strict	200	209.1	Escherichia coli soxS with mutation conferring antibiotic resistance	95.33	3003511	protein overexpression model	n/a	n/a	fluoroquinolone antibiotic; monobactam; carbapenem; cephalosporin; glycylcycline; cephamycin; penam; tetracycline antibiotic; rifamycin antibiotic; phenicol antibiotic; penem; disinfecting agents and antiseptics	antibiotic target alteration; antibiotic efflux; reduced permeability to antibiotic	ATP-binding cassette (ABC) antibiotic efflux pump; major facilitator superfamily (MFS) antibiotic efflux pump; resistance-nodulation-cell division (RND) antibiotic efflux pump; General Bacterial Porin with reduced permeability to beta-lactams	ATGTCGCATCAGCAGATAATTCAGACCCTTATCGAATGGATTGATGAACATATCGACCAACCGCTAAACATTGATGTGGTGGCAAAAAAATCGGGCTACTCCAAGTGGTATTTGCAGCGGATGTTTCGTACGGTAACGCATCAAACATTAGGCGAGTATATTCGCCAGCGCCGTCTCCTGTTGGCGGCCGTTGAGCTACGAACGACCGAGCGCCCGATTTTTGATATCGCGATGGACCTGGGCTATGTATCGCAGCAAACCTTCTCGCGTGTATTCCGCCGCGAGTTCGATCGCACTCCCAGCGATTACCGTCACCGCCTGTAG	MSHQQIIQTLIEWIDEHIDQPLNIDVVAKKSGYSKWYLQRMFRTVTHQTLGEYIRQRRLLLAAVELRTTERPIFDIAMDLGYVSQQTFSRVFRREFDRTPSDYRHRL	MSHQKIIQDLIAWIDEHIDQPLNIDVVAKKSGYSKWYLQRMFRTVTHQTLGDYIRQRRLLLAAVELRTTERPIFDIAMDLGYVSQQTFSRVFRRQFDRTPSDYRHRL	100	gnl|BL_ORD_ID|1974|hsp_num:0	2066			0	321	tigecycline; ciprofloxacin; tetracycline; rifampin; chloramphenicol; ampicillin; norfloxacin; cefalotin; triclosan; enrofloxacin
SA617	1_369 # 421789 # 422421 # -1 # ID=1_369;partial=00;start_type=ATG;rbs_motif=AGGA;rbs_spacer=9bp;gc_cont=0.506	1_369	421789	422421	-	Strict	400	418.3	CRP	99.05	3000518	protein homolog model	n/a	n/a	macrolide antibiotic; fluoroquinolone antibiotic; penam	antibiotic efflux	resistance-nodulation-cell division (RND) antibiotic efflux pump	ATGGTGCTTGGCAAACCGCAAACAGACCCGACTCTTGAATGGTTCTTGTCTCATTGCCACATTCATAAGTACCCGTCAAAGAGCACGCTGATTCACCAGGGTGAAAAAGCAGAAACGCTGTACTACATCGTTAAAGGCTCCGTGGCAGTGCTGATCAAAGATGAAGAAGGGAAAGAAATGATCCTTTCTTATCTGAATCAGGGTGATTTTATTGGTGAACTGGGCCTGTTTGAAGAAGGCCAGGAACGCAGCGCCTGGGTACGTGCGAAAACCGCATGTGAGGTCGCTGAAATTTCCTACAAAAAATTTCGCCAATTAATCCAGGTCAACCCGGATATTCTGATGCGCCTCTCTTCCCAGATGGCTCGTCGCTTACAAGTCACCTCTGAAAAAGTAGGT…	MVLGKPQTDPTLEWFLSHCHIHKYPSKSTLIHQGEKAETLYYIVKGSVAVLIKDEEGKEMILSYLNQGDFIGELGLFEEGQERSAWVRAKTACEVAEISYKKFRQLIQVNPDILMRLSSQMARRLQVTSEKVGNLAFLDVTGRIAQTLLNLAKQPDAMTHPDGMQIKITRQEIGQIVGCSRETVGRILKMLEDQNLISAHGKTIVVYGTR	MVLGKPQTDPTLEWFLSHCHIHKYPSKSKLIHQGEKAETLYYIVKGSVAVLIKDEEGKEMILSYLNQGDFIGELGLFEEGQERSAWVRAKTACEVAEISYKKFRQLIQVNPDILMRLSAQMARRLQVTSEKVGNLAFLDVTGRIAQTLLNLAKQPDAMTHPDGMQIKITRQEIGQIVGCSRETVGRILKMLEDQNLISAHGKTIVVYGTR	100	gnl|BL_ORD_ID|803|hsp_num:0	869			0	630	erythromycin; cloxacillin; oxacillin; norfloxacin
	1_621 # 660339 # 661160 # 1 # ID=1_621;partial=00;start_type=ATG;rbs_motif=AGG;rbs_spacer=9bp;gc_cont=0.536	1_621	660339	661160	+	Strict	500	511.5	bacA	97.07	3002986	protein homolog model	n/a	n/a	peptide antibiotic	antibiotic target alteration	undecaprenyl pyrophosphate related proteins	ATGAGCGATATGCACTCGCTGCTGATAGCGGCAATTTTGGGTGTGGTCGAAGGATTGACGGAGTTTTTGCCGGTATCCAGCACGGGCCATATGATTATTGTGGGTCATCTGCTGGGGTTTGAAGGCGATACGGCCAAGACATTCGAAGTGGTGATTCAACTTGGATCTATTCTGGCGGTCGTGGTGATGTTCTGGCGGCGGTTGTTTGGCCTCATCGGTATTCACTTTGGCCGCCCGCTACAGCGTGAAGGTGAAAGTAAAGGTCGATTAACGTTGATTCACATCCTGCTGGGCATGATTCCGGCGGTGGTGCTGGGGTTAGTCTTTCATGACACGATCAAGTCGCTATTTAACCCAATTAACGTGATGTACGCGCTGGTGGTAGGCGGTCTGTTGCTG…	MSDMHSLLIAAILGVVEGLTEFLPVSSTGHMIIVGHLLGFEGDTAKTFEVVIQLGSILAVVVMFWRRLFGLIGIHFGRPLQREGESKGRLTLIHILLGMIPAVVLGLVFHDTIKSLFNPINVMYALVVGGLLLIAAECLKPKEPRAPGLDDMTYRQAFMIGCFQCLALWPGFSRSGATISGGMLMGVSRYAASEFSFLLAVPMMMGATVLDLYKSWSFLTAADIPMFAVGFVTAFVVALIAIKTFLQLIKRISFIPFAIYRFVVAAAVYVVFF	MSDMHSLLIAAILGVVEGLTEFLPVSSTGHMIIVGHLLGFEGDTAKTFEVVIQLGSILAVVVMFWRRLFGLIGIHFGRPLQHEGESKGRLTLIHILLGMIPAVVLGLLFHDTIKSLFNPINVMYALVVGGLLLIAAECLKPKEPRAPGLDDMTYRQAFMIGCFQCLALWPGFSRSGATISGGMLMGVSRYAASEFSFLLAVPMMMGATALDLYKSWGFLTSGDIPMFAVGFITAFVVALIAIKTFLQLIKRISFIPFAIYRFIVAAAVYVVFF	100	gnl|BL_ORD_ID|1680|hsp_num:0	1820			0	819	bacitracin; bacitracin A; bacitracin B; bacitracin F
	1_1004 # 1063904 # 1064089 # 1 # ID=1_1004;partial=00;start_type=ATG;rbs_motif=AGGAG;rbs_spacer=6bp;gc_cont=0.511	1_1004	1063904	1064089	+	Strict	100	102.4	rsmA	85.25	3005069	protein homolog model	n/a	n/a	fluoroquinolone antibiotic; diaminopyrimidine antibiotic; phenicol antibiotic	antibiotic efflux	resistance-nodulation-cell division (RND) antibiotic efflux pump	ATGCTGATTCTGACTCGTCGAGTTGGTGAGACCCTCATGATTGGCGATGAGGTCACCGTGACAGTTTTAGGGGTGAAGGGCAACCAGGTGCGTATTGGCGTGAACGCCCCGAAAGAAGTTTCTGTCCATCGTGAAGAGATCTACCAGCGTATCCAGGCTGAAAAATCCCAGCAGTCCAGTTACTAA	MLILTRRVGETLMIGDEVTVTVLGVKGNQVRIGVNAPKEVSVHREEIYQRIQAEKSQQSSY	MLILTRRVGETLMVGDDVTVTVLGVKGNQVRIGVNAPKEVAVHREEIYQRIQKEKDQEPNH	100	gnl|BL_ORD_ID|2788|hsp_num:0	3807			0	183	trimethoprim; chloramphenicol
	1_1010 # 1070400 # 1071938 # -1 # ID=1_1010;partial=00;start_type=ATG;rbs_motif=GAGG;rbs_spacer=8bp;gc_cont=0.571	1_1010	1070400	1071938	-	Strict	900	966.5	emrB	95.9	3000074	protein homolog model	n/a	n/a	fluoroquinolone antibiotic	antibiotic efflux	major facilitator superfamily (MFS) antibiotic efflux pump	ATGCAACAGCAAAAACCGCTGGAGGGCGCGCAGCTCGTCATCATGACGATCGCGCTGTCGCTGGCGACATTCATGCAGGTGCTGGACTCCACCATTGCCAACGTGGCGATTCCGACCATCGCCGGGAACCTGGGTTCTTCCCTAAGCCAGGGGACATGGGTTATCACCTCTTTCGGGGTGGCGAACGCTATCTCGATTCCCTTAACCGGCTGGCTGGCGAAACGTTTTGGCGAAGTCAAACTGTTCATGTGGTCGACGGTCGCCTTTGCCGCGGCCTCCTGGGCCTGTGGCGTATCCAGCAGCCTGAATATGCTTATCTTCTTCCGCGTGGTGCAGGGCGTGGTCGCCGGGCCGCTGATTCCGCTCTCGCAAAGCCTGTTGCTGAATAACTATCCGCCT…	MQQQKPLEGAQLVIMTIALSLATFMQVLDSTIANVAIPTIAGNLGSSLSQGTWVITSFGVANAISIPLTGWLAKRFGEVKLFMWSTVAFAAASWACGVSSSLNMLIFFRVVQGVVAGPLIPLSQSLLLNNYPPAKRSIALALWSMTVIVAPICGPILGGYISDNYHWGWIFFINVPIGIAVVLMTLHTLRGRETHTERRRIDAVGLALLVIGIGSLQIMLDRGKELDWFSSQEIIILTVVAVIAISFLIVWELTDDHPIVDLSLFKSRNFTIGCLCISLAYMLYFGAIVLLPQLLQEVYGYTATWAGLASAPVGIIPVILSPIIGRFAHKLDMRRLVTFSFIMYAVCFYWRAWTFEPGMDFGASAWPQFIQGFAVACFFMPLTTITLSGLPPERLAAAS…	MQQQKPLEGAQLVIMTIALSLATFMQVLDSTIANVAIPTIAGNLGSSLSQGTWVITSFGVANAISIPLTGWLAKRVGEVKLFLWSTIAFAIASWACGVSSSLNMLIFFRVIQGIVAGPLIPLSQSLLLNNYPPAKRSIALALWSMTVIVAPICGPILGGYISDNYHWGWIFFINVPIGVAVVLMTLQTLRGRETRTERRRIDAVGLALLVIGIGSLQIMLDRGKELDWFSSQEIIILTVVAVVAICFLIVWELTDDNPIVDLSLFKSRNFTIGCLCISLAYMLYFGAIVLLPQLLQEVYGYTATWAGLASAPVGIIPVILSPIIGRFAHKLDMRRLVTFSFIMYAVCFYWRAYTFEPGMDFGASAWPQFIQGFAVACFFMPLTTITLSGLPPERLAAAS…	100	gnl|BL_ORD_ID|1705|hsp_num:0	1847			0	1536	nalidixic acid
	1_1012 # 1073254 # 1073784 # -1 # ID=1_1012;partial=00;start_type=ATG;rbs_motif=GAGG;rbs_spacer=10bp;gc_cont=0.482	1_1012	1073254	1073784	-	Strict	280	327	emrR	93.14	3000516	protein homolog model	n/a	n/a	fluoroquinolone antibiotic	antibiotic efflux	major facilitator superfamily (MFS) antibiotic efflux pump	ATGGATAGTTCGTTTACGCCCATTGAACAAATGCTAAAATTTCGCGCCAGCCGTCACGAAGACTTTCCTTATCAGGAAATTCTTTTGACTCGTCTTTGTATGCACATGCAAGGCAAGCTCCTGGAAAACCGCAATAAAATGCTGAAGGCTCAAGGGATTAACGAGACGTTGTTTATGGCGTTGATTACGCTGGAGTCTCAGGAAAACCACAGTATTCAGCCGTCTGAATTAAGCTGCGCGCTGGGTTCATCTCGCACCAATGCGACACGCATTGCAGATGAGCTGGAAAAACGCGGCTGGATTGAGCGTCGTGAGAGCGATAACGACCGCCGTTGCCTGCATCTGCAATTAACGGAGAAAGGCCAGGCATTTTTGCAAGAAGTGCTTCCGCCTCAGCAT…	MDSSFTPIEQMLKFRASRHEDFPYQEILLTRLCMHMQGKLLENRNKMLKAQGINETLFMALITLESQENHSIQPSELSCALGSSRTNATRIADELEKRGWIERRESDNDRRCLHLQLTEKGQAFLQEVLPPQHHCLHQLWSSLSTAEKDQLEHITRKLLTRLDQMEQEGTVLEALR	MDSSFTPIEQMLKFRASRHEDFPYQEILLTRLCMHMQSKLLENRNKMLKAQGINETLFMALITLESQENHSIQPSELSCALGSSRTNATRIADELEKRGWIERRESDNDRRCLHLQLTEKGHEFLREVLPPQHNCLHQLWSALSTTEKDQLEQITRKLLSRLDQMEQDGVVLEAMS	100	gnl|BL_ORD_ID|1225|hsp_num:0	1330			0	525	nalidixic acid
	1_1392 # 1514972 # 1516618 # -1 # ID=1_1392;partial=00;start_type=ATG;rbs_motif=GAG;rbs_spacer=6bp;gc_cont=0.541	1_1392	1514972	1516618	-	Strict	400	718.8	ArnT	62.61	3005053	protein homolog model	n/a	n/a	peptide antibiotic	antibiotic target alteration	pmr phosphoethanolamine transferase	ATGATGAAATCGATACGCTATTATCTGGCTTTCGCCGCATTTATCGCGCTCTACTATGTTATTCCTGTCAATAGCCGCCTGCTCTGGCAGCCGGATGAAACGCGCTATGCCGAAATAAGTCGGGAGATGCTGGCGTCTGGCGACTGGATCGTGCCGCATTTTCTGGGATTACGTTATTTTGAAAAACCGATAGCCGGTTACTGGATAAACAGTCTGGGTCAGTGGCTTTTTGGCGCTACCAATTTTGGCGTGCGGGCTGGCGCTATTTTAACGACATTGCTGGCCGCAGCGCTGGTGGCGTGGCTGACGTTCCGCTTATGGCGGGATAAACGTACCGCGTTGCTCGCCTCCGTTATCTTTCTCTCCCTCTTTGCCGTTTACAGTATCGGGACGTATGCG…	MMKSIRYYLAFAAFIALYYVIPVNSRLLWQPDETRYAEISREMLASGDWIVPHFLGLRYFEKPIAGYWINSLGQWLFGATNFGVRAGAILTTLLAAALVAWLTFRLWRDKRTALLASVIFLSLFAVYSIGTYAVLDPMIALWLTAGMCCFWQGMQATTRTGKIGMFLLLGATCGLGVLTKGFLALAVPVVSVLPWVIVQKRWKDFLLYGWLAVLSCFVVVLPWAIAIARREADFWHYFFWVEHIQRFAMSDAQHKAPFWYYLPVLLAGSLPWLGLLPGALKLGWRERNGAFYLLGWTIMPLLFFSIAKGKLPTYVLSCFAPIAILMARFVLHNVKEGVAALRVNGGINLVFGIIGIVAAFVVSSWGPLKSPVWTHIETYKVFCVWGVFTVWAFVGWYSL…	MKSIRYGVSLIALFALYYLLPLNFRLLWQPDETRYAEISREMLATGDWVVPHFLGLRYFEKPIAGYWINSIGQWLFGHNNFGVRFGSVFAITMTALLVAWLAWRIFRDKRVAILSLIIFLTAMLVYAIGTYAVLDPMITLWLALAMCSFWGAVQAHSRSGKILGYVLLGVACGMGVMTKGFLALAVPVVGVLPWVIARKRWREVLTYGWLAVIVCTLVVLPWGLAIAQREPDFWRYFFWVEHIQRFAEKDAQHKAPFWYYIPFLIAGSLPWLALLPGALKRGWLERDEARGALYLLGWVAMPFLFFSIAKGKLPTYILPCFAPLSILMARYALEAAKTGAKALRINGMINLGVGLLGLIAVLVVSPWGFMHKPVWTKIELYKCLLAAIAFAVWALMGWL…	99.46	gnl|BL_ORD_ID|2779|hsp_num:0	3795			0	1653	colistin A; colistin B
	1_1395 # 1519490 # 1520473 # -1 # ID=1_1395;partial=00;start_type=ATG;rbs_motif=AGGA;rbs_spacer=8bp;gc_cont=0.538	1_1395	1519490	1520473	-	Strict	550	554.7	PmrF	87.42	3003578	protein homolog model	n/a	n/a	peptide antibiotic	antibiotic target alteration	pmr phosphoethanolamine transferase	ATGTTTGACGCCGCCCCCATAAAAAAAGTCTCGGTGGTTATTCCTGTCTATAACGAACAGGAAAGCCTGCCGGAATTGATAAGACGCACCACCGCCGCCTGCGAGAGTCTGGGCAAAGCGTGGGAGATTTTATTGATAGATGATGGTAGCAGCGATAGCTCGGCGGAGCTGATGGTTAAGGCGTCCCAGGAAGCCGATAGCCATATCATCTCTATTTTACTCAACCGTAACTACGGTCAACATGCAGCGATCATGGCGGGGTTTAGCCATGTAAGCGGCGATCTCATCATTACGCTGGATGCCGATCTGCAAAACCCGCCGGAAGAGATCCCGCGCCTGGTGGCGAAAGCCGATGAAGGGTTCGATGTGGTAGGCACCGTGCGCCAGAACCGACAGGAC…	MFDAAPIKKVSVVIPVYNEQESLPELIRRTTAACESLGKAWEILLIDDGSSDSSAELMVKASQEADSHIISILLNRNYGQHAAIMAGFSHVSGDLIITLDADLQNPPEEIPRLVAKADEGFDVVGTVRQNRQDSLFRKSASKIINLLIQRTTGKAMGDYGCMLRAYRRPIIDTMLRCHERSTFIPILANIFARRATEIPVHHAEREFGDSKYSFMRLINLMYDLVTCLTTTPLRLLSLLGSVIAIGGFSLSVLLIVLRLALGPQWAAEGVFMLFAVLFTFIGAQFIGMGLLGEYIGRIYNDVRARPRYFVQQVIYPESTPFTEESHQ	MFEIHPVKKVSVVIPVYNEQESLPELIRRTTTACESLGKEYEILLIDDGSSDNSAHMLVEASQAENSHIVSILLNRNYGQHSAIMAGFSHVTGDLIITLDADLQNPPEEIPRLVAKADEGYDVVGTVRQNRQDSWFRKTASKMINRLIQRTTGKAMGDYGCMLRAYRRHIVDAMLHCHERSTFIPILANIFARRAIEIPVHHAEREFGESKYSFMRLINLMYDLVTCLTTTPLRMLSLLGSIIAIGGFSIAVLLVILRLTFGPQWAAEGVFMLFAVLFTFIGAQFIGMGLLGEYIGRIYTDVRARPRYFVQQVIRPSSKENE	101.55	gnl|BL_ORD_ID|1936|hsp_num:0	2014			0	954	polymyxin B
	1_1668 # 1820416 # 1821840 # 1 # ID=1_1668;partial=00;start_type=TTG;rbs_motif=AGG;rbs_spacer=6bp;gc_cont=0.538	1_1668	1820416	1821840	+	Strict	900	909.1	MdtK	99.16	3001327	protein homolog model	n/a	n/a	fluoroquinolone antibiotic	antibiotic efflux	multidrug and toxic compound extrusion (MATE) transporter	TTGAACGTCTCCACTGCCTTACGCCAGGCTGTCGTCCGTACGCCCTGGTATGCCAAACGCAAGAGCTACAAAGTGTTGTTCTGGCGTGAAATCACCCCACTTGCTATCCCTATTTTTCTGGAAAATACCTGTGTTTTGCTAATGGGCGTGCTCAGTACTTTTCTCGTCAGTTGGCTGGGCAAGGAAGCAATGGCGGGCGTGGGGCTTGCCGACAGTTTTAATATGGTAATTATGGCTTTTTTTGCGGCTATCGATCTTGGTACTACGGTGGTGGTTGCCTTTAGCCTGGGCAAGCGCGACAGGCGACGGGCAAGGGCGGCGGCGCGCCAGTCGCTGGTGATTATGACGCTATTTGCCGTTGTGCTGGCAGTGGTCATTCATTATTTCGGCAGTGAAATT…	MNVSTALRQAVVRTPWYAKRKSYKVLFWREITPLAIPIFLENTCVLLMGVLSTFLVSWLGKEAMAGVGLADSFNMVIMAFFAAIDLGTTVVVAFSLGKRDRRRARAAARQSLVIMTLFAVVLAVVIHYFGSEIINIVAGEATSEVKGLALTYLELTVLSYPAAAIALIGSGALRGAGNTKIPLMINGGMNILNIIISSILIYGAFSWQGLGFAGAGLGLTISRYIGAVAIIWVLMIGFNPALRIPLKSYLKPLNFGIIWEVMGIGIPASIESVLFNGGKLLTQMFVAGMGTNVIAGNFIAFSVAALINLPGNALGSASTIITGKRLGTGQIGQAERQLRHVFWMSTIVLTAIAWGTAPFAGLFASFYTQEQDVKEVVKVLLWLNAVFMPIWAAAWVLPS…	MNVSTALRQAVVRTPWYAKRKSYKVLFWREITPLAIPIFLENTCVLLMGVLSTFLVSWLGKEAMAGVGLADSFNMVIMAFFAAIDLGTTVVVAFSLGKRDRRRARAAARQSLVIMTLFAVVLAVVIHYFGSEIINIVAGEATPEVKGLALTYLELTVLSYPAAAIALIGSGALRGAGNTKIPLMINGGMNILNIIISSILIYGAFSWQGLGFAGAGLGLTISRYIGAVAIIWVLMIGFNPALRIPLKSYLKPLNFGIIWEVMGIGIPASIESVLFNGSKLLTQMFVAGMGTNVIAGNFIAFSVAALINLPGNALGSASTIITGKRLGTGQIGQAERQLRHVFWMSTIVLTAIAWGTAPFAGLFASFYTQEQDVKEVVKVLLWLNAAFMPIWAAAWVLPS…	100	gnl|BL_ORD_ID|1649|hsp_num:0	1752			0	1422	ciprofloxacin
	1_2111 # 2250561 # 2250923 # 1 # ID=1_2111;partial=00;start_type=ATG;rbs_motif=AGGAG;rbs_spacer=7bp;gc_cont=0.446	1_2111	2250561	2250923	+	Strict	150	169.1	Klebsiella pneumoniae KpnE	76.67	3004580	protein homolog model	n/a	n/a	macrolide antibiotic; aminoglycoside antibiotic; cephalosporin; tetracycline antibiotic; peptide antibiotic; rifamycin antibiotic; disinfecting agents and antiseptics	antibiotic efflux	small multidrug resistance (SMR) antibiotic efflux pump	ATGTTTTACTGGATTTTATTAGCTCTGGCTATCGCGACTGAAATTACCGGCACGCTCTCAATGAAATGGGCTAGCGTGGGTAATGGCAATGCGGGTTTTATTTTAATGCTGGTGATGATCACGCTGTCATATATATTTCTTTCTTTTGCGGTAAAAAAGATTGCCCTGGGTGTAGCGTATGCCTTATGGGAAGGGATCGGCATTTTATTTATTACCATTTTTAGCGTGCTGCTATTTGATGAAGCATTATCAACCATGAAGATTGCCGGCTTGCTGACGCTGGTCGCCGGCATAGTATTGATCAAATCAGGGACGCGTAAACCCGGCAAACCGGTGAAGGAGGCGACTCGTGCAACAATTTGA	MFYWILLALAIATEITGTLSMKWASVGNGNAGFILMLVMITLSYIFLSFAVKKIALGVAYALWEGIGILFITIFSVLLFDEALSTMKIAGLLTLVAGIVLIKSGTRKPGKPVKEATRATI	MFYWILLALAIIAEITGTLSMKWASVSGGHTGFILMLAMIALSYIFLAFAVKKIALGVAYALWEGIGILLITLFSVLLFDESLSLLKIAGLTTLVIGIVLIKSGTQKKASSQQEVAHAAV	100	gnl|BL_ORD_ID|2715|hsp_num:0	3283			0	360	erythromycin; streptomycin; tetracycline; cefepime; ceftriaxone; rifampin; colistin A; colistin B; triclosan; benzalkonium chloride; chlorhexidine
	1_2112 # 2250910 # 2251239 # 1 # ID=1_2112;partial=00;start_type=GTG;rbs_motif=AGGAG;rbs_spacer=7bp;gc_cont=0.558	1_2112	2250910	2251239	+	Strict	150	189.1	Klebsiella pneumoniae KpnF	87.16	3004583	protein homolog model	n/a	n/a	macrolide antibiotic; aminoglycoside antibiotic; cephalosporin; tetracycline antibiotic; peptide antibiotic; rifamycin antibiotic; disinfecting agents and antiseptics	antibiotic efflux	small multidrug resistance (SMR) antibiotic efflux pump	GTGCAACAATTTGAATGGATACACGGCGCCTGGCTTGGGCTGGCAATAATGCTGGAAATCGCGGCTAACGTACTGTTGAAATTTTCGGACGGCTTTCGCCGTAAATGCTATGGCATCTTATCGCTTGCCGCTGTTCTGGCCGCCTTCAGCGCGCTTTCCCAGGCGGTAAAAGGGATAGACCTGTCGGTGGCGTATGCGTTATGGGGCGGTTTTGGTATTGCCGCCACGCTGGCGGCGGGCTGGGTGCTCTTCGGCCAGCGCTTAAACCCCAAAGGCTGGGTTGGCGTGATATTGCTGCTCGCCGGAATGGTCATGATCAAATTTGCCTGA	MQQFEWIHGAWLGLAIMLEIAANVLLKFSDGFRRKCYGILSLAAVLAAFSALSQAVKGIDLSVAYALWGGFGIAATLAAGWVLFGQRLNPKGWVGVILLLAGMVMIKFA	MQQFEWIHAAWLAIAIVLEIIANVFLKFSDGFRRKIYGILSLAAVLGAFSALSQAVKGIDLSVAYALWGGFGIAATIAAGWVLFGQRLNNKGWAGVILLVAGMVLIKLA	100	gnl|BL_ORD_ID|2717|hsp_num:0	3286			0	327	erythromycin; streptomycin; tetracycline; cefepime; ceftriaxone; rifampin; colistin A; colistin B; triclosan; benzalkonium chloride; chlorhexidine
	1_2149 # 2287420 # 2287803 # -1 # ID=1_2149;partial=00;start_type=ATG;rbs_motif=GAGG;rbs_spacer=7bp;gc_cont=0.471	1_2149	2287420	2287803	-	Strict	230	247.3	marA	95.24	3000263	protein homolog model	n/a	n/a	fluoroquinolone antibiotic; monobactam; carbapenem; cephalosporin; glycylcycline; cephamycin; penam; tetracycline antibiotic; rifamycin antibiotic; phenicol antibiotic; penem; disinfecting agents and antiseptics	antibiotic efflux; reduced permeability to antibiotic	resistance-nodulation-cell division (RND) antibiotic efflux pump; General Bacterial Porin with reduced permeability to beta-lactams	ATGTCCAGACGCAACACTGACGCTATTACTATTCATAGCATTTTGGACTGGATCGAGGATAACCTGGAGTCGCCGCTCTCACTGGAAAAAGTGTCTGAGCGTTCAGGATATTCCAAATGGCACCTGCAACGGATGTTTAAAAAAGAGACCGGTCATTCATTAGGCCAATACATCCGCAGCCGTAAAATGACGGAAATCGCGCAAAAATTAAAAGAGAGCAACGAGCCCATTCTCTATCTGGCGGAACGCTATGGCTTTGAGTCACAGCAAACATTGACCCGGACGTTCAAAAACTACTTTGATGTGCCGCCACACAAATACCGGATCACCAATATGCATGGCGAATCACGGTATATGCTGCCGCTGAACCATGGCAACTACTAG	MSRRNTDAITIHSILDWIEDNLESPLSLEKVSERSGYSKWHLQRMFKKETGHSLGQYIRSRKMTEIAQKLKESNEPILYLAERYGFESQQTLTRTFKNYFDVPPHKYRITNMHGESRYMLPLNHGNY	MSRRNTDAITIHSILDWIEDNLESPLSLEKVSERSGYSKWHLQRMFKKETGHSLGQYIRSRKMTEIAQKLKESNEPILYLAERYGFESQQTLTRTFKNYFDVPPHKYRMTNMQGESRFLHPLNHYNS	100	gnl|BL_ORD_ID|1771|hsp_num:0	1922			0	378	tigecycline; tetracycline; rifampin; chloramphenicol; ampicillin; cefalotin; triclosan
	1_2244 # 2393159 # 2393596 # 1 # ID=1_2244;partial=00;start_type=ATG;rbs_motif=AGGAG;rbs_spacer=7bp;gc_cont=0.523	1_2244	2393159	2393596	+	Strict	275	298.1	AAC(6')-Iy	97.24	3002569	protein homolog model	n/a	n/a	aminoglycoside antibiotic	antibiotic inactivation	AAC(6')	ATGGACATCAGGCAAATGAACAAAACCCATCTGGAGCACTGGCGCGGATTGCGAAAACAGCTCTGGCCCGGTCACCCGGATGACGCCCATCTGGCAGACGGCGAAGAAATCCTGCAAGCCGATCATTTGGCATCATTTGTTGCGATGGCAGACGGGGTGGCGATTGGCTTTGCGGATGCCTCAATCCGCCACGATTATGTCAATGGCTGTGACAGTTCGCCCGTGGCTTTTCTTGAAGGTATTTTTGTTCTCCCCTCGTTCCGTCAACGCGGCGTAGCGAAACAATTGATTGCAGCGGTGCAACGATGGGGAACGAATAAAGGGTGTCGGGAAATGGCCTCTGATACCACGCCGGAAAATACAATTTCCCAGAAAGTTCACCTGGCATTAGGATTTGAG…	MDIRQMNKTHLEHWRGLRKQLWPGHPDDAHLADGEEILQADHLASFVAMADGVAIGFADASIRHDYVNGCDSSPVAFLEGIFVLPSFRQRGVAKQLIAAVQRWGTNKGCREMASDTTPENTISQKVHLALGFEETERVIFYRKRC	MDIRQMNKTHLEHWRGLRKQLWPGHPDDAHLADGEEILQADHLASFIAMADGVAIGFADASIRHDYVNGCDSSPVVFLEGIFVLPSFRQRGVAKQLIAAVQRWGTNKGCREMASDTSPENTISQKVHQALGFEETERVIFYRKRC	100	gnl|BL_ORD_ID|330|hsp_num:0	360			0	435	dibekacin; amikacin; sisomicin; netilmicin; tobramycin; 2'-N-ethylnetilmicin; 5-episisomicin
	1_2403 # 2550216 # 2550629 # 1 # ID=1_2403;partial=00;start_type=ATG;rbs_motif=GAG;rbs_spacer=9bp;gc_cont=0.454	1_2403	2550216	2550629	+	Strict	240	245.7	H-NS	94.89	3000676	protein homolog model	n/a	n/a	macrolide antibiotic; fluoroquinolone antibiotic; cephalosporin; cephamycin; penam; tetracycline antibiotic	antibiotic efflux	major facilitator superfamily (MFS) antibiotic efflux pump; resistance-nodulation-cell division (RND) antibiotic efflux pump	ATGAGCGAAGCACTTAAAATTCTGAACAACATCCGTACTCTTCGTGCGCAGGCAAGAGAATGTACTCTGGAAACGCTTGAAGAAATGCTGGAAAAATTAGAAGTTGTCGTTAATGAGCGTCGTGAAGAAGAAAGCGCTGCTGCTGCTGAAGTGGAAGAACGCACTCGTAAACTGCAACAGTATCGTGAAATGTTAATTGCCGACGGCATTGACCCGAATGAACTGCTGAATAGCATGGCTGCCGCTAAATCCGGTACCAAAGCTAAACGCGCAGCTCGTCCGGCTAAATATAGCTATGTTGACGAAAACGGTGAAACTAAAACCTGGACTGGCCAGGGTCGTACACCGGCTGTAATCAAAAAAGCAATGGAAGAACAAGGTAAGCAACTGGAAGATTTC…	MSEALKILNNIRTLRAQARECTLETLEEMLEKLEVVVNERREEESAAAAEVEERTRKLQQYREMLIADGIDPNELLNSMAAAKSGTKAKRAARPAKYSYVDENGETKTWTGQGRTPAVIKKAMEEQGKQLEDFLIKE	MSEALKILNNIRTLRAQARECTLETLEEMLEKLEVVVNERREEESAAAAEVEERTRKLQQYREMLIADGIDPNELLNSLAAVKSGTKAKRAQRPAKYSYVDENGETKTWTGQGRTPAVIKKAMDEQGKSLDDFLIKQ	100	gnl|BL_ORD_ID|1144|hsp_num:0	1248			0	411	erythromycin; cloxacillin; ciprofloxacin; tetracycline; oxacillin; norfloxacin
	1_2621 # 2764208 # 2764930 # -1 # ID=1_2621;partial=00;start_type=ATG;rbs_motif=None;rbs_spacer=None;gc_cont=0.492	1_2621	2764208	2764930	-	Strict	470	488.4	sdiA	99.58	3000826	protein homolog model	n/a	n/a	fluoroquinolone antibiotic; cephalosporin; glycylcycline; penam; tetracycline antibiotic; rifamycin antibiotic; phenicol antibiotic; disinfecting agents and antiseptics	antibiotic efflux	resistance-nodulation-cell division (RND) antibiotic efflux pump	ATGCAGGAAAATGATTTCTTCACCTGGCGACGCGCAATGTTGTTACGCTTTCAGGAGATGGCGGCAGCAGAGGATGTTTATACTGAATTGCAATATCAGACACAGCGGCTGGAATTTGATTATTATGCCCTGTGTGTTCGTCATCCCGTCCCCTTTACCCGGCCTAAAATATCGCTTCGTACCACTTATCCTCCGGCGTGGGTAACGCATTACCAGTCCGAAAACTATTTTGCGATCGATCCGGTATTAAAGCCGGAAAATTTCAGGCAGGGTCATTTACATTGGGATGACGTGCTATTTCATGAAGCGCAGGCGATGTGGGATGCCGCCCAGCGTTTCGGATTACGCAGAGGCGTAACCCAGTGTGTGATGTTGCCGAACCGGGCGCTGGGCTTTTTA…	MQENDFFTWRRAMLLRFQEMAAAEDVYTELQYQTQRLEFDYYALCVRHPVPFTRPKISLRTTYPPAWVTHYQSENYFAIDPVLKPENFRQGHLHWDDVLFHEAQAMWDAAQRFGLRRGVTQCVMLPNRALGFLSFSRSSLRCSSFTYDEVELRLQLLARESLSALTRFEDDMVMAPEMRFSKREKEILKWTAEGKTSSEIAIILSISENTVNFHQKNMQKKFNAPNKTQIACYAAATGLI	MQENDFFTWRRAMLLRFQEMAAAEDVYTELQYQTQRLEFDYYALCVRHPVPFTRPKISLRTTYPPAWVTHYQSENYFAIDPVLKPENFRQGHLHWDDVLFHEAKAMWDAAQRFGLRRGVTQCVMLPNRALGFLSFSRSSLRCSSFTYDEVELRLQLLARESLSALTRFEDDMVMAPEMRFSKREKEILKWTAEGKTSSEIAIILSISENTVNFHQKNMQKKFNAPNKTQIACYAAATGLI	100	gnl|BL_ORD_ID|208|hsp_num:0	228			0	720	tigecycline; tetracycline; rifampin; chloramphenicol; ampicillin; cefalotin; triclosan
	1_2791 # 2932277 # 2934025 # -1 # ID=1_2791;partial=00;start_type=ATG;rbs_motif=None;rbs_spacer=None;gc_cont=0.516	1_2791	2932277	2934025	-	Strict	1000	1067.4	msbA	96.39	3003950	protein homolog model	n/a	n/a	nitroimidazole antibiotic	antibiotic efflux	ATP-binding cassette (ABC) antibiotic efflux pump	ATGCATAACGATAAAGATCTCTCTACGTGGCAGACCTTCCGCCGACTGTGGCCAACCATAGCGCCTTTTAAAGCAGGTCTGATCGTGGCGGGCATAGCGTTAATTCTCAACGCAGCCAGCGATACCTTCATGCTATCGCTCCTCAAGCCATTACTGGATGATGGTTTCGGTAAAACGGATCGCTCAGTGTTGCTGTGGATGCCGCTGGTGGTTATTGGGCTGATGATATTACGAGGCATCACTAGCTATATCTCCAGCTACTGTATTTCATGGGTGTCAGGCAAGGTGGTAATGACCATGCGCCGTCGCCTGTTTGGCCATATGATGGGAATGCCCGTCGCCTTCTTTGATAAACAGTCTACCGGTACGCTGCTGTCGCGTATTACTTACGATTCAGAA…	MHNDKDLSTWQTFRRLWPTIAPFKAGLIVAGIALILNAASDTFMLSLLKPLLDDGFGKTDRSVLLWMPLVVIGLMILRGITSYISSYCISWVSGKVVMTMRRRLFGHMMGMPVAFFDKQSTGTLLSRITYDSEQVASSSSGALITVVREGASIIGLFIMMFYYSWQLSIILVVLAPIVSIAIRVVSKRFRSISKNMQNTMGQVTTSAEQMLKGHKEVLIFGGQEVETKRFDKVSNKMRLQGMKMVSASSISDPIIQLIASLALAFVLYAASFPSVMDSLTAGTITVVFSSMIALMRPLKSLTNVNAQFQRGMAACQTLFAILDSEQEKDEGKRVIDRATGDLEFRNVTFTYPGREVPALRNINLKIPAGKTVALVGRSGSGKSTIASLITRFYDIDEGH…	MHNDKDLSTWQTFRRLWPTIAPFKAGLIVAGVALILNAASDTFMLSLLKPLLDDGFGKTDRSVLVWMPLVVIGLMILRGITSYVSSYCISWVSGKVVMTMRRRLFGHMMGMPVSFFDKQSTGTLLSRITYDSEQVASSSSGALITVVREGASIIGLFIMMFYYSWQLSIILIVLAPIVSIAIRVVSKRFRNISKNMQNTMGQVTTSAEQMLKGHKEVLIFGGQEVETKRFDKVSNRMRLQGMKMVSASSISDPIIQLIASLALAFVLYAASFPSVMDSLTAGTITVVFSSMIALMRPLKSLTNVNAQFQRGMAACQTLFTILDSEQEKDEGKRVIERATGDVEFRNVTFTYPGRDVPALRNINLKIPAGKTVALVGRSGSGKSTIASLITRFYDIDEGE…	100	gnl|BL_ORD_ID|2183|hsp_num:0	2423			0	1746	metronidazole
	1_2866 # 3020996 # 3022228 # -1 # ID=1_2866;partial=00;start_type=ATG;rbs_motif=GAG;rbs_spacer=5bp;gc_cont=0.554	1_2866	3020996	3022228	-	Strict	700	700.7	Escherichia coli mdfA	87.71	3001328	protein homolog model	n/a	n/a	tetracycline antibiotic; disinfecting agents and antiseptics	antibiotic efflux	major facilitator superfamily (MFS) antibiotic efflux pump	ATGCAGAATCGTTTACAATCAGGCGGCAGGCTGGGACGTCAGGCGCTGCTTTTTCCTCTCTGTCTGGTGCTGTACGAATTTTCTACTTATATTGGCAACGACATGATCCAGCCGGGTATGCTGGCGGTGGTTGAGCAGTATCAGGCGTGCCTGGACTGGGTTCCGACGTCCATGACCGCTTATCTGGCGGGCGGTATGTTCTTACAGTGGCTGCTTGGCCCGTTGTCTGACCGGATTGGCCGTCGTCCCGTGATGCTGGCGGGCGTCGTGTGGTTTATTGTCACCTGCCTGGCGACGTTACTGGCGAAAAACATCGAACAATTTACCTTCCTGCGTTTTTTGCAAGGGATTAGCCTGTGTTTTATCGGCGCTGTAGGGTATGCCGCGATTCAGGAGTCC…	MQNRLQSGGRLGRQALLFPLCLVLYEFSTYIGNDMIQPGMLAVVEQYQACLDWVPTSMTAYLAGGMFLQWLLGPLSDRIGRRPVMLAGVVWFIVTCLATLLAKNIEQFTFLRFLQGISLCFIGAVGYAAIQESFEEAVCIKITALMANVALIAPLLGPLVGAAWVHVLPWEGMFILFAALAAIAFFGLQRAMPETATRRGETLSFKALGRDYRLVIKNRRFVAGALALGFVSLPLLAWIAQSPIIIISGEQLSSYEYGLLQVPVFGALIAGNLVLARLTSRRTVRSLIVMGGWPIVAGLIIAAAATVVSSHAYLWMTAGLSVYAFGIGLANAGLVRLTLFSSDMSKGTVSAAMGMLQMLIFTVGIEVSKHAWLSGGNGLFSLFNLANGILWLLLMLVFL…	MQNKLASGARLGRQALLFPLCLVLYEFSTYIGNDMRQPGMLENVEQYQAGIEWVPTSMNAYLAGGMFIQWLLGPLSDRIGRRPVMLAGVVWFIVTCLAILLAQNIEQFTLLRFLHGISLCFIGAVGYDAIQESFEEAVCIKITALMANVALIAPLLGPLVGASWIHVLPWEGMFVLFAALAAISFFGLQRAMPETATRIGEKLSLKELGRDYKLVLKNGRFVAGALALGFLSLPLLAWIAQSPIIIITGEQLSSYEYGLLQVPIFGALIAGNLLLARLTSRRTVRSLIIMGGWPIMIGLLVAAAATVISSHAYLWMTAGLSIYAFGIGLANAGLVRLTLFASVMSKGTVSAAMGMLQMLIFTVGIEISKHAWLNGGNGLFNLFNLVNGILLLSLMVIFL…	100	gnl|BL_ORD_ID|2417|hsp_num:0	37			0	1221	tetracycline; benzalkonium chloride
	1_3016 # 3180528 # 3181205 # 1 # ID=1_3016;partial=00;start_type=GTG;rbs_motif=GAGGA;rbs_spacer=3bp;gc_cont=0.563	1_3016	3180528	3181205	+	Strict	400	422.9	kdpE	91.96	3003841	protein homolog model	n/a	n/a	aminoglycoside antibiotic	antibiotic efflux	kdpDE	GTGACAAACGTTCTGATTGTTGAAGATGAACAGGCCATCCGCCGCTTTCTGCGCGCCGCGCTGGAAGGCGACGGCCTGCGCGTGTATGAAGCTGAAACATTACAACGTGGTTTACTGGAAGCCGCCACGCGAAAGCCCGATCTGATTATTCTCGATCTCGGCCTGCCGGACGGCGACGGAATCGATTTCATTCGCGACCTGCGTCAGTGGAGCGCAATACCGGTGATTGTCCTTTCCGCCCGCAGCGAAGAAAGCGATAAGATTGCCGCGCTTGACGCCGGAGCTGATGATTACCTGAGCAAGCCATTCGGCATTGGCGAGTTGCAGGCGCGTTTGCGTGTCGCGCTGCGACGGCACGCCGCCAGCCCTAGCGCCGATCCGATCGTCCGTTTTTCCGGC…	MTNVLIVEDEQAIRRFLRAALEGDGLRVYEAETLQRGLLEAATRKPDLIILDLGLPDGDGIDFIRDLRQWSAIPVIVLSARSEESDKIAALDAGADDYLSKPFGIGELQARLRVALRRHAASPSADPIVRFSGVTVDLAARLIHRGDEEIHLTPIEFRLLAVLLNNTGKVLTQRQLLNQVWGPNAVEHSHYLRIYMGHLRQKLEQDPTRPRHFITETGIGYRFMP	MTNVLIVEDEQAIRRFLRTALEGDGMRVFEAETLQRGLLEAATRKPDLIILDLGLPDGDGIEFIRDLRQWSAVPVIVLSARSEESDKIAALDAGADDYLSKPFGIGELQARLRVALRRHSATTAPDPLVKFSDVTVDLAARVIHRGEEEVHLTPIEFRLLAVLLNNAGKVLTQRQLLNQVWGPNAVEHSHYLRIYMGHLRQKLEQDPARPRHFITETGIGYRFML	100	gnl|BL_ORD_ID|2101|hsp_num:0	2331			0	672	kanamycin A
	1_3232 # 3406630 # 3407823 # 1 # ID=1_3232;partial=00;start_type=ATG;rbs_motif=GAGG;rbs_spacer=7bp;gc_cont=0.554	1_3232	3406630	3407823	+	Strict	670	691	Escherichia coli acrA	91.69	3004043	protein homolog model	n/a	n/a	fluoroquinolone antibiotic; cephalosporin; glycylcycline; penam; tetracycline antibiotic; rifamycin antibiotic; phenicol antibiotic; disinfecting agents and antiseptics	antibiotic efflux	resistance-nodulation-cell division (RND) antibiotic efflux pump	ATGAACAAAAACAGAGGGTTAACGCCTCTGGCGGTCGTTCTGATGCTCTCAGGCAGCTTAGCGCTAACAGGATGTGACGACAAACAGGACCAGCAAGGCGGCCAGCAGATGCCAGAAGTTGGAGTTGTCACACTAAAAACGGAACCACTGCAAATCACAACTGAACTTCCGGGTCGTACCGTTGCTTACCGTATCGCCGAAGTTCGCCCACAGGTAAGCGGCATTATCCTGAAGCGTAATTTCGTTGAGGGAAGTGATATCGAAGCGGGAGTCTCTCTCTATCAGATTGATCCTGCGACCTACCAGGCGACTTACGACAGCGCTAAGGGCGATCTGGCAAAAGCGCAGGCCGCCGCGAATATCGCTGAACTGACGGTGAAGCGTTATCAAAAGCTGCTG…	MNKNRGLTPLAVVLMLSGSLALTGCDDKQDQQGGQQMPEVGVVTLKTEPLQITTELPGRTVAYRIAEVRPQVSGIILKRNFVEGSDIEAGVSLYQIDPATYQATYDSAKGDLAKAQAAANIAELTVKRYQKLLGTQYISKQEYDQALADAQQATAAVVAAKAAVETARINLAYTKVTSPISGRIGKSSVTEGALVQNGQASALATVQQLDPIYVDVTQSSNDFLRLKQELANGSLKQENGKAKVDLVTSDGIKFPQSGTLEFSDVTVDQTTGSITLRAIFPNPDHTLLPGMFVRARLQEGTKPTALLVPQQGVTRTPRGDATVLVVGADNKVETRQIVASQAIGDKWLVTDGLKAGDRVVVSGLQKVRPGAQVKVQEITADNKQQAASGDQPAQPRS	MNKNRGFTPLAVVLMLSGSLALTGCDDKQAQQGGQQMPAVGVVTVKTEPLQITTELPGRTSAYRIAEVRPQVSGIILKRNFKEGSDIEAGVSLYQIDPATYQATYDSAKGDLAKAQAAANIAQLTVNRYQKLLGTQYISKQEYDQALADAQQANAAVTAAKAAVETARINLAYTKVTSPISGRIGKSNVTEGALVQNGQATALATVQQLDPIYVDVTQSSNDFLRLKQELANGTLKQENGKAKVSLITSDGIKFPQDGTLEFSDVTVDQTTGSITLRAIFPNPDHTLLPGMFVRARLEEGLNPNAILVPQQGVTRTPRGDATVLVVGADDKVETRPIVASQAIGDKWLVTEGLKAGDRVVISGLQKVRPGVQVKAQEVTADNNQQAASGAQPEQSKS	100	gnl|BL_ORD_ID|2319|hsp_num:0	2661			0	1191	tigecycline; tetracycline; rifampin; chloramphenicol; ampicillin; cefalotin; triclosan
	1_3233 # 3407846 # 3410995 # 1 # ID=1_3233;partial=00;start_type=ATG;rbs_motif=AGGAG;rbs_spacer=10bp;gc_cont=0.543	1_3233	3407846	3410995	+	Strict	1900	1902.5	acrB	94.66	3000216	protein homolog model	n/a	n/a	fluoroquinolone antibiotic; cephalosporin; glycylcycline; penam; tetracycline antibiotic; rifamycin antibiotic; phenicol antibiotic; disinfecting agents and antiseptics	antibiotic efflux	resistance-nodulation-cell division (RND) antibiotic efflux pump	ATGCCTAATTTCTTTATCGATCGCCCTATATTTGCGTGGGTGATCGCCATCATCATCATGTTGGCAGGGGGGCTCGCGATCCTCAAATTGCCGGTAGCGCAATATCCGACGATTGCGCCACCAGCAGTGACGATCTCCGCAACCTACCCTGGCGCTGATGCGAAAACGGTACAGGATACCGTCACGCAGGTTATCGAACAGAATATGAACGGTATCGATAACCTGATGTATATGTCCTCCAACAGTGACTCCACGGGGACCGTGCAGATCACGCTGACCTTTGAATCCGGCACCGATGCGGATATCGCGCAGGTTCAGGTTCAGAACAAGTTGCAACTGGCAATGCCTTTACTTCCCCAGGAAGTACAGCAACAGGGCGTGAGCGTTGAGAAGTCCTCA…	MPNFFIDRPIFAWVIAIIIMLAGGLAILKLPVAQYPTIAPPAVTISATYPGADAKTVQDTVTQVIEQNMNGIDNLMYMSSNSDSTGTVQITLTFESGTDADIAQVQVQNKLQLAMPLLPQEVQQQGVSVEKSSSSFLMVVGVINTDGTMTQEDISDYVAANMKDPISRTSGVGDVQLFGSQYAMRIWMNPTELTKYQLTPVDVINAIKAQNAQVAAGQLGGTPPVKGQQLNASIIAQTRLTSTDEFGKILLKVNQDGSQVRLRDVAKIELGGENYDVIAKFNGQPASGLGIKLATGANALDTATAIRAELKKMEPFFPPGMKIVYPYDTTPFVKISIHEVVKTLVEAIILVFLVMYLFLQNFRATLIPTIAVPVVLLGTFAVLAAFGFSINTLTMFGMV…	MPNFFIDRPIFAWVIAIIIMLAGGLAILKLPVAQYPTIAPPAVTISASYPGADAKTVQDTVTQVIEQNMNGIDNLMYMSSNSDSTGTVQITLTFESGTDADIAQVQVQNKLQLAMPLLPQEVQQQGVSVEKSSSSFLMVVGVINTDGTMTQEDISDYVAANMKDAISRTSGVGDVQLFGSQYAMRIWMNPNELNKFQLTPVDVITAIKAQNAQVAAGQLGGTPPVKGQQLNASIIAQTRLTSTEEFGKILLKVNQDGSRVLLRDVAKIELGGENYDIIAEFNGQPASGLGIKLATGANALDTAAAIRAELAKMEPFFPSGLKIVYPYDTTPFVKISIHEVVKTLVEAIILVFLVMYLFLQNFRATLIPTIAVPVVLLGTFAVLAAFGFSINTLTMFGMV…	100	gnl|BL_ORD_ID|1011|hsp_num:0	1104			0	3144	tigecycline; acriflavine; tetracycline; rifampin; chloramphenicol; ampicillin; cefalotin; triclosan
	1_3328 # 3505576 # 3506688 # 1 # ID=1_3328;partial=00;start_type=ATG;rbs_motif=None;rbs_spacer=None;gc_cont=0.517	1_3328	3505576	3506688	+	Strict	250	261.2	vanG	38.87	3002909	protein homolog model	n/a	n/a	glycopeptide antibiotic	antibiotic target alteration	glycopeptide resistance gene cluster; Van ligase	ATGGAATGGGTTTTTAAGATGGCGAAATTGCGGGTAGGAATAGTATTTGGCGGTAAGTCGGCGGAACATGAAGTGTCTTTGCAATCAGCGAAAAATATCGTTGATGCGATCGATAAAACCCGCTTCGACGTGGTGCTGTTAGGGATAGATAAGGCGGGACAATGGCATGTTAACGATGCGGAAAATTATTTGCAGAATGCAGACGATCCGGCACATATCGCGCTACGTCCTTCGGCAATCAGTCTGGCCCAGGTGCCTGGCAAACATCAACACCAATTGATTAACGCCCAGAACGGGCAGCCGCTACCGACGGTAGATGTTATTTTTCCTATCGTCCACGGTACGCTGGGCGAAGACGGCTCATTGCAGGGGATGCTGCGCGTCGCAAACTTACCGTTT…	MEWVFKMAKLRVGIVFGGKSAEHEVSLQSAKNIVDAIDKTRFDVVLLGIDKAGQWHVNDAENYLQNADDPAHIALRPSAISLAQVPGKHQHQLINAQNGQPLPTVDVIFPIVHGTLGEDGSLQGMLRVANLPFVGSDVLSSAACMDKDIAKRLLRDAGLNIAPFITLTRTNRHAFSFAEVESRLGLPLFVKPANQGSSVGVSKVANEAQYQQAVALAFEFDHKVVVEQGIKGREIECAVLGNDNPQASTCGEIVLNSEFYAYDTKYIDDNGAQVVVPAQLPSGVNDKIRAIAIQAYQTLGCAGMARVDVFLTADNEVVINEINTLPGFTNISMYPKLWQASGLGYTDLISRLIELALERHTANNALKTTM	MQNKKIAVIFGGNSTEYEVSLQSASAVFENINTNKFDIIPIGITRSGEWYHYTGEKEKILNNTWFEDSKNLCPVVVSQNRSVKGFLEIASDKYRIIKVDLVFPVLHGKNGEDGTLQGIFELAGIPVVGCDTLSSALCMDKDRAHKLVSLAGISVPKSVTFKRFNEEAAMKEIEANLTYPLFIKPVRAGSSFGITKVIEKQELDAAIELAFEHDTEVIVEETINGFEVGCAVLGIDELIVGRVDEIELSSGFFDYTEKYTLKSSKIYMPARIDAEAEKRIQEAAVTIYKALGCSGFSRVDMFYTPSGEIVFNEVNTIPGFTSHSRYPNMMKGIGLSFSQMLDKLIGLYVE	106.02	gnl|BL_ORD_ID|1069|hsp_num:0	1157			0	1047	vancomycin
	1_3354 # 3538984 # 3539448 # -1 # ID=1_3354;partial=00;start_type=ATG;rbs_motif=AGGAG;rbs_spacer=7bp;gc_cont=0.544	1_3354	3538984	3539448	-	Perfect	290	310.1	golS	100	3000504	protein homolog model	n/a	n/a	monobactam; carbapenem; cephalosporin; cephamycin; penam; phenicol antibiotic; penem	antibiotic efflux	resistance-nodulation-cell division (RND) antibiotic efflux pump	ATGAACATCGGTAAAGCAGCTAAAGCATCGAAAGTCTCGGCCAAAATGATTCGCTACTATGAACAGATTGGTCTGATTCCCGCGGCAAGTCGGACGGATTCCGGCTATCGGGCCTATACCCAGGCTGATGTTAATCAATTGCATTTTATACGCCGCGCGCGCGACCTCGGTTTTTCAGTTGCTGAAATCAGCGACTTACTGAATCTTTGGAATAACCAGTCGCGGCAAAGCGCTGACGTCAAACGCCTGGCGCAGACGCACATTGATGAACTGGACAGACGTATCCAGAACATGCAGCACATGGCGCAAACCCTCAAAGCGCTGATTCACTGCTGCGCCGGCGACGCGCTGCCAGATTGTCCCATTCTGCATACGCTTGGACAACCTGACGATAGCGAG…	MNIGKAAKASKVSAKMIRYYEQIGLIPAASRTDSGYRAYTQADVNQLHFIRRARDLGFSVAEISDLLNLWNNQSRQSADVKRLAQTHIDELDRRIQNMQHMAQTLKALIHCCAGDALPDCPILHTLGQPDDSEPEARTGAVLRRPRRHGLAKRL	MNIGKAAKASKVSAKMIRYYEQIGLIPAASRTDSGYRAYTQADVNQLHFIRRARDLGFSVAEISDLLNLWNNQSRQSADVKRLAQTHIDELDRRIQNMQHMAQTLKALIHCCAGDALPDCPILHTLGQPDDSEPEARTGAVLRRPRRHGLAKRL	100	gnl|BL_ORD_ID|36|hsp_num:0	44			0	462	chloramphenicol
	1_3357 # 3543248 # 3546415 # 1 # ID=1_3357;partial=00;start_type=ATG;rbs_motif=AGG;rbs_spacer=10bp;gc_cont=0.567	1_3357	3543248	3546415	+	Strict	750	1209.9	adeF	60.67	3000777	protein homolog model	n/a	n/a	fluoroquinolone antibiotic; tetracycline antibiotic	antibiotic efflux	resistance-nodulation-cell division (RND) antibiotic efflux pump	ATGAAATTCACCCACTTTTTCATTGCACGACCCATCTTCGCCATCGTCCTGTCGCTGTTAATGCTGCTGGCTGGCGCTATCGCCTTTTTAAAACTGCCGCTGAGTGAATATCCGGCCGTTACGCCGCCCACGGTACAGGTTAGCGCCAGCTACCCCGGCGCTAACCCGCAAGTGATTGCCGATACGGTAGCCGCGCCGCTGGAACAGGTGATCAACGGCGTTGACGGCATGTTGTATATGAATACCCAGATGGCCATTGATGGTCGCATGGTTATCTCTATCGCCTTCGAACAGGGAACCGATCCTGATATGGCGCAAATTCAGGTGCAAAACCGGGTATCCCGCGCGCTGCCTCGCCTGCCCGAAGAAGTCCAGCGAATTGGCGTTGTAACGGAGAAA…	MKFTHFFIARPIFAIVLSLLMLLAGAIAFLKLPLSEYPAVTPPTVQVSASYPGANPQVIADTVAAPLEQVINGVDGMLYMNTQMAIDGRMVISIAFEQGTDPDMAQIQVQNRVSRALPRLPEEVQRIGVVTEKTSPDMLMVVHLVSPQKRYDSLYLSNFAIRQVRDELARLPGVGDVLVWGAGEYAMRVWLDPAKIANRGLTASDIVTALREQNVQVAAGSVGQQPEASAAFQMTVNTLGRLTSEEQFGEIVVKIGADGEVTRLRDVARVTLGADAYTLRSLLNGEAAPALQIIQSPGANAIDVSNAIRGKMDELQQNFPQDIEYRIAYDPTVFVRASLQSVAITLLEALVLVVLVVVLFLQTWRASIIPLVAVPVSLVGTFALMHLFGFSLNTLSLFG…	MNISKFFIDRPIFAGVLSVLILLAGLLSVFQLPISEYPEVVPPSVVVRAQYPGANPKVIAETVASPLEESINGVEDMLYMQSQANSDGNLTITVNFKLGIDPDKAQQLVQNRVSQAMPRLPEDVQRLGVTTLKSSPTLTMVVHLTSPDNRYDMTYLRNYAVLNVKDRLARLQGVGEVGLFGSGDYAMRVWLDPQKVAQRNLTATEIVNAIREQNIQVAAGTIGASPSNSPLQLSVNAQGRLTTEQEFADIILKTAPDGAVTRLGDVARVELAASQYGLRSLLDNKQAVAIPIFQAPGANALQVSDQVRSTMKELSKDFPSSIKYDIVYDPTQFVRASIKAVVHTLLEAITLVVVVVILFLQTWRASIIPLLAVPVSIIGTFALMLAFGYSINALSLFGM…	99.62	gnl|BL_ORD_ID|133|hsp_num:0	153			0	3126	tetracycline
	1_3572 # 3784416 # 3785360 # -1 # ID=1_3572;partial=00;start_type=ATG;rbs_motif=GGAG;rbs_spacer=6bp;gc_cont=0.476	1_3572	3784416	3785360	-	Strict	500	562	leuO	86.62	3003843	protein homolog model	n/a	n/a	nucleoside antibiotic; disinfecting agents and antiseptics	antibiotic efflux	major facilitator superfamily (MFS) antibiotic efflux pump	ATGCCAGAGGTCAAAACCGAAAAGCCGCATCTTTTAGATATGGGCAAACCACAGCTTCGCATGGTTGATTTGAACCTATTGACCGTGTTCGATGCGGTAATGCAAGAGCAGAATATTACGCGCGCCGCCCACACGCTGGGAATGTCGCAGCCTGCGGTCAGTAACGCCGTAGCGCGTCTGAAGGTTATGTTTAATGACGAACTTTTTGTTCGATATGGACGAGGAATTCAGCCGACTGCCCGTGCATTTCAGTTATTTGGTTCAGTCCGTCAGGCGTTACAATTGGTGCAAAATGAATTGCCGGGATCGGGGTTTGAGCCGACCAGCAGCGAACGTGTATTCAATCTTTGCGTGTGCAGTCCGCTGGATAATATCCTGACGTCACAGATTTATAATCGT…	MPEVKTEKPHLLDMGKPQLRMVDLNLLTVFDAVMQEQNITRAAHTLGMSQPAVSNAVARLKVMFNDELFVRYGRGIQPTARAFQLFGSVRQALQLVQNELPGSGFEPTSSERVFNLCVCSPLDNILTSQIYNRVEKIAPNIHVVFKASLNQNTEHQLRYQETEFVISYEEFRRPEFTSVPLFKDEMVLVASRKHPRISGPLLEGDVYNEQHAVVSLDRYASFSQPWYDTPDKQSSVAYQGMVLISVLNVVSQTHLVAIAPRWLAEEFAESLDLQILPLPLKLNSRTCYLSWHEAAGRDKGHQWMEDLLVSVCKR	MPEVQTDHPETAELSKPQLRMVDLNLLTVFDAVMQEQNITRAAHALGMSQPAVSNAVARLKVMFNDELFVRYGRGIQPTARAFQLFGSVRQALQLVQNELPGSGFEPASSERVFHLCVCSPLDSILTSQIYNHIEQIAPNIHVMFKSSLNQNTEHQLRYQETEFVISYEDFHRPEFTSVPLFKDEMVLVASKNHPTIKGPLLKHDVYNEQHAAVSLDRFASFSQTWYDTVDKQASIAYQGMAMMSVLSVVSQTHLVAIAPRWLAEEFAESLELQVLPLPLKQNSRTCYLSWHEAAGRDKGHQWMEEQLVSICKR	100	gnl|BL_ORD_ID|4919|hsp_num:0	5921			0	942	acriflavine; puromycin
	3_11 # 7019 # 7879 # -1 # ID=3_11;partial=00;start_type=ATG;rbs_motif=AGGA;rbs_spacer=5bp;gc_cont=0.490	3_11	7019	7879	-	Perfect	500	571.2	TEM-135	100	3000999	protein homolog model	n/a	n/a	monobactam; cephalosporin; penam; penem	antibiotic inactivation	TEM beta-lactamase	ATGAGTATTCAACATTTTCGTGTCGCCCTTATTCCCTTTTTTGCGGCATTTTGCCTTCCTGTTTTTGCTCACCCAGAAACGCTGGTGAAAGTAAAAGATGCTGAAGATCAGTTGGGTGCACGAGTGGGTTACATCGAACTGGATCTCAACAGCGGTAAGATCCTTGAGAGTTTTCGCCCCGAAGAACGTTTTCCAATGATGAGCACTTTTAAAGTTCTGCTATGTGGTGCGGTATTATCCCGTGTTGACGCCGGGCAAGAGCAACTCGGTCGCCGCATACACTATTCTCAGAATGACTTGGTTGAGTACTCACCAGTCACAGAAAAGCATCTTACGGATGGCATGACAGTAAGAGAATTATGCAGTGCTGCCATAACCATGAGTGATAACACTGCTGCC…	MSIQHFRVALIPFFAAFCLPVFAHPETLVKVKDAEDQLGARVGYIELDLNSGKILESFRPEERFPMMSTFKVLLCGAVLSRVDAGQEQLGRRIHYSQNDLVEYSPVTEKHLTDGMTVRELCSAAITMSDNTAANLLLTTIGGPKELTAFLHNMGDHVTRLDRWEPELNEAIPNDERDTTTPAAMATTLRKLLTGELLTLASRQQLIDWMEADKVAGPLLRSALPAGWFIADKSGAGERGSRGIIAALGPDGKPSRIVVIYTTGSQATMDERNRQIAEIGASLIKHW	MSIQHFRVALIPFFAAFCLPVFAHPETLVKVKDAEDQLGARVGYIELDLNSGKILESFRPEERFPMMSTFKVLLCGAVLSRVDAGQEQLGRRIHYSQNDLVEYSPVTEKHLTDGMTVRELCSAAITMSDNTAANLLLTTIGGPKELTAFLHNMGDHVTRLDRWEPELNEAIPNDERDTTTPAAMATTLRKLLTGELLTLASRQQLIDWMEADKVAGPLLRSALPAGWFIADKSGAGERGSRGIIAALGPDGKPSRIVVIYTTGSQATMDERNRQIAEIGASLIKHW	100	gnl|BL_ORD_ID|1558|hsp_num:0	1697			0	858	penicillin; ampicillin
	1_54 # 57532 # 58923 # 1 # ID=1_54;partial=00;start_type=ATG;rbs_motif=AGGAG;rbs_spacer=6bp;gc_cont=0.552	1_54	57532	58923	+	Strict	850	867.1	Escherichia coli UhpT with mutation conferring resistance to fosfomycin	95.68	3003890	protein variant model	E350Q	n/a	phosphonic acid antibiotic	antibiotic target alteration	antibiotic-resistant UhpT	ATGCTGGCCTTCTTAAACCAGGTGCGCAAGCCGACCCTGGATCTGCCGCTCGATGTGCGGCGTAAAATGTGGTTCAAGCCGTTCATGCAGTCCTATCTGGTGGTTTTTATCGGCTACCTGACCATGTACCTGATCCGCAAAAACTTTAACATCGCGCAGAACGACATGATTTCTACCTACGGGTTGAGCATGACCGAGCTGGGGATGATTGGCCTGGGCTTCTCGATCACCTACGGCGTGGGGAAAACGCTGGTTTCCTACTACGCTGACGGTAAAAATACCAAGCAGTTTCTACCGTTTATGTTGATCCTCTCCGCTATCTGTATGCTCGGCTTCAGCGCCAGCATGGGCGCGGGGTCAACCAGTCTGTTTCTGATGATCGCTTTCTATGCCCTGAGC…	MLAFLNQVRKPTLDLPLDVRRKMWFKPFMQSYLVVFIGYLTMYLIRKNFNIAQNDMISTYGLSMTELGMIGLGFSITYGVGKTLVSYYADGKNTKQFLPFMLILSAICMLGFSASMGAGSTSLFLMIAFYALSGFFQSTGGSCSYSTITKWTPRRKRGTFLGFWNISHNLGGAGAAGVALFGANYLFDGHVIGMFIFPSIIALIVGFIGLRFGSDSPESYGLGKAEELFGEEISEEDKETEENEMTKWQIFVEYVLKNKVIWLLCFSNIFLYVVRIGIDQWSTVYAFQELKLSKEVAIQGFTLFEVGALVGTLLWGWLSDLANGRRALVACVALALIIATLGVYQHASNQYVYLASLFALGFLVFGPQLLIGVAAVGFVPKKAIGAADGIKGTFAYLIG…	MLAFLNQVRKPTLDLPLEVRRKMWFKPFMQSYLVVFIGYLTMYLIRKNFNIAQNDMISTYGLSMTQLGMIGLGFSITYGVGKTLVSYYADGKNTKQFLPFMLILSAICMLGFSASMGSGSVSLFLMIAFYALSGFFQSTGGSCSYSTITKWTPRRKRGTFLGFWNISHNLGGAGAAGVALFGANYLFDGHVIGMFIFPSIIALIVGFIGLRYGSDSPESYGLGKAEELFGEEISEEDKETESTDMTKWQIFVEYVLKNKVIWLLCFANIFLYVVRIGIDQWSTVYAFQELKLSKAVAIQGFTLFEAGALVGTLLWGWLSDLANGRRGLVACIALALIIATLGVYQHASNEYIYLASLFALGFLVFGPQLLIGVAAVGFVPKKAIGAADGIKGTFAYLIG…	100	gnl|BL_ORD_ID|2126|hsp_num:0	2373			0	1389	fosfomycin
	1_390 # 438579 # 439763 # 1 # ID=1_390;partial=00;start_type=GTG;rbs_motif=AGGA;rbs_spacer=8bp;gc_cont=0.542	1_390	438579	439763	+	Strict	700	786.9	Escherichia coli EF-Tu mutants conferring resistance to Pulvomycin	99.49	3003369	protein variant model	R234F	n/a	elfamycin antibiotic	antibiotic target alteration	elfamycin resistant EF-Tu	GTGTCTAAAGAAAAATTTGAACGTACAAAACCGCACGTTAACGTCGGCACCATCGGCCACGTTGACCACGGTAAAACTACCCTGACCGCTGCAATCACCACCGTACTGGCTAAAACCTACGGCGGTGCTGCTCGTGCATTCGACCAGATCGATAACGCGCCGGAAGAAAAAGCGCGTGGTATCACCATCAACACTTCTCACGTTGAATACGATACCCCGACCCGCCACTACGCACACGTAGACTGCCCGGGGCACGCCGACTATGTTAAAAACATGATCACCGGTGCTGCTCAGATGGACGGCGCGATTCTGGTTGTTGCTGCGACTGACGGCCCGATGCCGCAGACCCGTGAGCACATCCTGCTGGGTCGTCAGGTAGGCGTTCCGTACATCATCGTG…	MSKEKFERTKPHVNVGTIGHVDHGKTTLTAAITTVLAKTYGGAARAFDQIDNAPEEKARGITINTSHVEYDTPTRHYAHVDCPGHADYVKNMITGAAQMDGAILVVAATDGPMPQTREHILLGRQVGVPYIIVFLNKCDMVDDEELLELVEMEVRELLSQYDFPGDDTPIVRGSALKALEGDAEWEAKIIELAGFLDSYIPEPERAIDKPFLLPIEDVFSISGRGTVVTGRVERGIIKVGEEVEIVGIKETQKSTCTGVEMFRKLLDEGRAGENVGVLLRGIKREEIERGQVLAKPGTIKPHTKFESEVYILSKDEGGRHTPFFKGYRPQFYFRTTDVTGTIELPEGVEMVMPGDNIKMVVTLIHPIAMDDGLRFAIREGGRTVGAGVVAKVLG	MLSPEGESTIVRNIAVSKEKFERTKPHVNVGTIGHVDHGKTTLTAAITTVLAKTYGGAARAFDQIDNAPEEKARGITINTSHVEYDTPTRHYAHVDCPGHADYVKNMITGAAQMDGAILVVAATDGPMPQTREHILLGRQVGVPYIIVFLNKCDMVDDEELLELVEMEVRELLSQYDFPGDDTPIVRGSALKALEGDAEWEAKILELAGFLDSYIPEPERAIDKPFLLPIEDVFSISGRGTVVTGRVERGIIKVGEEVEIVGIKETQKSTCTGVEMFRKLLDEGRAGENVGVLLRGIKREEIERGQVLAKPGTIKPHTKFESEVYILSKDEGGRHTPFFKGYRPQFYFRTTDVTGTIELPEGVEMVMPGDNIKMVVTLIHPIAMDDGLRFAIREGGRTV…	96.33	gnl|BL_ORD_ID|1969|hsp_num:0	2158			45	1227	pulvomycin
	1_1411 # 1535600 # 1536958 # 1 # ID=1_1411;partial=00;start_type=ATG;rbs_motif=GGAG;rbs_spacer=8bp;gc_cont=0.548	1_1411	1535600	1536958	+	Strict	850	898.7	Escherichia coli GlpT with mutation conferring resistance to fosfomycin	96.9	3003889	protein variant model	E448K	n/a	phosphonic acid antibiotic	antibiotic target alteration	antibiotic-resistant GlpT	ATGTTGAGTATTTTTAAACCAGCGCCGCATAAAGCGCGCTTGCCAGCGGCGGAGATTGATCCGACCTATCGCCGATTACGCTGGCAGATTTTCCTGGGGATATTCTTTGGCTATGCCGCGTATTATCTGGTGCGCAAGAACTTTGCCCTCGCGATGCCCTACCTGGTAGAACAGGGTTTTTCACGCGGCGATCTGGGCTTTGCGTTGTCCGGGATTTCCATCGCTTATGGTTTTTCGAAATTTATAATGGGTTCGGTGTCCGATCGCTCGAATCCGCGCGTTTTTCTGCCGGCAGGGTTGATTCTGGCCGCAGCAGTCATGTTGTTTATGGGCTTTGTGCCGTGGGCGACATCCAGCATCGCCGTGATGTTTGTGCTGTTGTTCCTTTGCGGCTGGTTC…	MLSIFKPAPHKARLPAAEIDPTYRRLRWQIFLGIFFGYAAYYLVRKNFALAMPYLVEQGFSRGDLGFALSGISIAYGFSKFIMGSVSDRSNPRVFLPAGLILAAAVMLFMGFVPWATSSIAVMFVLLFLCGWFQGMGWPPCGRTMVHWWSQKERGGIVSVWNCAHNVGGGIPPLLFLLGMAWFNDWKAALYMPAFGAIVVALFAFAMMRDTPQSCGLPPIEEYKNDYPDDYNEKAEEELTAKQIFMQYVLPNKLLWYIAIANVFVYLLRYGILDWSPTYLKEVKHFALDKSSWAYFLYEYAGIPGTLLCGWMSDKVFRGNRGATGVFFMTLVTIATIVYWMNPAGNPNVDMACMIIIGFLIYGPVMLIGLHALELAPKKAAGTAAGFTGLFGYLGGSVA…	MLSIFKPAPHKARLPAAEIDPTYRRLRWQIFLGIFFGYAAYYLVRKNFALAMPYLVEQGFSRGDLGFALSGISIAYGFSKFIMGSVSDRSNPRVFLPAGLILAAAVMLFMGFVPWATSSIAVMFVLLFLCGWFQGMGWPPCGRTMVHWWSQKERGGIVSVWNCAHNVGGGIPPLLFLLGMAWFNDWHAALYMPAFCAILVALFAFAMMRDTPQSCGLPPIEEYKNDYPDDYNEKAEQELTAKQIFMQYVLPNKLLWYIAIANVFVYLLRYGILDWSPTYLKEVKHFALDKSSWAYFLYEYAGIPGTLLCGWMSDKVFRGNRGATGVFFMTLVTIATIVYWMNPAGNPTVDMICMIVIGFLIYGPVMLIGLHALELAPKKAAGTAAGFTGLFGYLGGSVA…	100	gnl|BL_ORD_ID|2127|hsp_num:0	2372			0	1356	fosfomycin
	1_1422 # 1549216 # 1551852 # 1 # ID=1_1422;partial=00;start_type=ATG;rbs_motif=GGA;rbs_spacer=10bp;gc_cont=0.559	1_1422	1549216	1551852	+	Strict	1500	1679.5	Salmonella enterica gyrA conferring resistance to fluoroquinolones	99.89	3003926	protein variant model	D87Y	D87Y:1545	fluoroquinolone antibiotic	antibiotic target alteration	fluoroquinolone resistant gyrA	ATGAGCGACCTTGCGAGAGAAATTACACCGGTCAACATTGAGGAAGAGCTGAAAAGCTCCTATCTGGATTATGCGATGTCGGTCATTGTTGGCCGTGCGCTGCCGGATGTCCGAGATGGCCTGAAGCCGGTACACCGTCGCGTACTTTACGCCATGAACGTATTGGGCAATGACTGGAACAAAGCCTATAAAAAATCTGCCCGTGTCGTTGGTGACGTAATCGGTAAATACCATCCCCACGGCGATTCCGCAGTGTATTACACCATCGTTCGTATGGCGCAGCCATTCTCGCTGCGTTACATGCTGGTGGATGGTCAGGGTAACTTCGGTTCTATTGACGGCGACTCCGCGGCGGCAATGCGTTATACGGAGATCCGTCTGGCGAAAATCGCCCACGAA…	MSDLAREITPVNIEEELKSSYLDYAMSVIVGRALPDVRDGLKPVHRRVLYAMNVLGNDWNKAYKKSARVVGDVIGKYHPHGDSAVYYTIVRMAQPFSLRYMLVDGQGNFGSIDGDSAAAMRYTEIRLAKIAHELMADLEKETVDFVDNYDGTEKIPDVMPTKIPNLLVNGSSGIAVGMATNIPPHNLTEVINGCLAYIDNEDISIEGLMEHIPGPDFPTAAIINGRRGIEEAYRTGRGKVYIRARAEVEADAKTGRETIIVHEIPYQVNKARLIEKIAELVKDKRVEGISALRDESDKDGMRIVIEVKRDAVGEVVLNNLYSQTQLQVSFGINMVALHHGQPKIMNLKDIISAFVRHRREVVTRRTIFELRKARDRAHILEALAIALANIDPIIELIRR…	MSDLAREITPVNIEEELKSSYLDYAMSVIVGRALPDVRDGLKPVHRRVLYAMNVLGNDWNKAYKKSARVVGDVIGKYHPHGDSAVYDTIVRMAQPFSLRYMLVDGQGNFGSIDGDSAAAMRYTEIRLAKIAHELMADLEKETVDFVDNYDGTEKIPDVMPTKIPNLLVNGSSGIAVGMATNIPPHNLTEVINGCLAYIDNEDISIEGLMEHIPGPDFPTAAIINGRRGIEEAYRTGRGKVYIRARAEVEADAKTGRETIIVHEIPYQVNKARLIEKIAELVKDKRVEGISALRDESDKDGMRIVIEVKRDAVGEVVLNNLYSQTQLQVSFGINMVALHHGQPKIMNLKDIISAFVRHRREVVTRRTIFELRKARDRAHILEALAIALANIDPIIELIRR…	100	gnl|BL_ORD_ID|2156|hsp_num:0	2403			0	2634	ciprofloxacin; nalidixic acid
	1_3565 # 3776437 # 3778203 # -1 # ID=1_3565;partial=00;start_type=ATG;rbs_motif=AGGA;rbs_spacer=12bp;gc_cont=0.547	1_3565	3776437	3778203	-	Strict	500	564.7	Haemophilus influenzae PBP3 conferring resistance to beta-lactam antibiotics	51.85	3004446	protein variant model	D350N, S357N	n/a	cephalosporin; cephamycin; penam	antibiotic target alteration	Penicillin-binding protein mutations conferring resistance to beta-lactam antibiotics	ATGAAAGCAGCGGCAAAAACGCAAAAATCGAAACGCCAGGAAGAACAGACCAACTTCATCAGTTGGCGTTTTGCGTTGCTGTGCGGCTGTATTTTACTGGCGCTGGTTTTTTTACTTGGACGCGCGGCGTGGCTACAGATTATCGCCCCGGATATGCTGGTGCGTCAGGGCGATATGCGTTCGCTGCGTGTTCAGGAAGTCTCCACCTCACGCGGTATGATTACCGACCGTTCCGGGCGTCCACTGGCGGTCAGCGTACCGGTTAAGGCGATCTGGGCCGACCCGAAAGAAGTTCATGACGCCGGCGGCATCAGCGTTGGCGATCGCTGGAAAGCGCTTTCTACTGCGCTCAATATTCCGCTCGATCAGCTCTCCGCCCGTATCAACGCCAACCCGAAA…	MKAAAKTQKSKRQEEQTNFISWRFALLCGCILLALVFLLGRAAWLQIIAPDMLVRQGDMRSLRVQEVSTSRGMITDRSGRPLAVSVPVKAIWADPKEVHDAGGISVGDRWKALSTALNIPLDQLSARINANPKGRFIYLARQVNPDMADYIKKLKLPGIHLREESRRYYPSGEVTAHLIGFTNVDSQGIEGVEKSFDKWLTGQPGERIVRKDRYGRVIEDISSTDSQAAHNLALSIDERLQALVYRELNNAVAFNKAESGSAVLVDVNTGEVLAMANSPSYNPNNLAGTPKDAMRNRTITDVFEPGSTVKPMVVMTALQRGIVNENTVLNTVPYRINGHEIKDVARYSELTLTGVLQKSSNVGVSKLALAMPSSALVDTYSRFGLGKATNLGLVGERSG…	MVKFNSSRKSGKSKKTIRKLTAPETVKQNKPQKVFEKCFMRGRYMLSTVLILLGLCALVARAAYVQSINADTLSNEADKRSLRKDEVLSVRGSILDRNGQLLSVSVPMSAIVADPKTMLKENSLADKERIAALAEELGMTENDLVKKIEKNSKSGYLYLARQVELSKANYIRRLKIKGIILETEHRRFYPRVEEAAHVVGYTDIDGNGIEGIEKSFNSLLVGKDGSRTVRKDKRGNIVAHISDEKKYDAQDVTLSIDEKLQSMVYREIKKAVSENNAESGTAVLVDVRTGEVLAMATAPSYNPNNRVGVKSELMRNRAITDTFEPGSTVKPFVVLTALQRGVVKRDEIIDTTSFKLSGKEIVDVAPRAQQTLDEILMNSSNRGVSRLALRMPPSALMET…	96.39	gnl|BL_ORD_ID|2491|hsp_num:0	2886			63	1758	ceftriaxone; ampicillin; cefaclor; cefotaxime; cefditoren; cefdinir
	1_4096 # 4371328 # 4372512 # -1 # ID=1_4096;partial=00;start_type=ATG;rbs_motif=GAGG;rbs_spacer=8bp;gc_cont=0.540	1_4096	4371328	4372512	-	Strict	700	786.9	Escherichia coli EF-Tu mutants conferring resistance to Pulvomycin	99.49	3003369	protein variant model	R234F	n/a	elfamycin antibiotic	antibiotic target alteration	elfamycin resistant EF-Tu	ATGTCTAAAGAAAAGTTTGAACGTACAAAACCGCACGTTAACGTCGGTACTATCGGCCACGTTGACCATGGTAAAACAACGCTGACCGCTGCCATTACTACCGTACTGGCTAAAACCTACGGCGGTGCCGCCCGCGCATTCGACCAGATCGATAACGCGCCGGAAGAAAAAGCGCGTGGTATCACCATCAACACTTCTCACGTTGAATACGATACCCCGACCCGCCACTACGCACACGTAGACTGCCCGGGGCACGCCGACTATGTTAAAAACATGATCACCGGTGCTGCTCAGATGGACGGCGCGATTCTGGTTGTTGCTGCGACTGACGGCCCGATGCCGCAGACCCGTGAGCACATCCTGCTGGGTCGTCAGGTAGGCGTTCCGTACATCATCGTG…	MSKEKFERTKPHVNVGTIGHVDHGKTTLTAAITTVLAKTYGGAARAFDQIDNAPEEKARGITINTSHVEYDTPTRHYAHVDCPGHADYVKNMITGAAQMDGAILVVAATDGPMPQTREHILLGRQVGVPYIIVFLNKCDMVDDEELLELVEMEVRELLSQYDFPGDDTPIVRGSALKALEGDAEWEAKIIELAGFLDSYIPEPERAIDKPFLLPIEDVFSISGRGTVVTGRVERGIIKVGEEVEIVGIKETQKSTCTGVEMFRKLLDEGRAGENVGVLLRGIKREEIERGQVLAKPGTIKPHTKFESEVYILSKDEGGRHTPFFKGYRPQFYFRTTDVTGTIELPEGVEMVMPGDNIKMVVTLIHPIAMDDGLRFAIREGGRTVGAGVVAKVLG	MLSPEGESTIVRNIAVSKEKFERTKPHVNVGTIGHVDHGKTTLTAAITTVLAKTYGGAARAFDQIDNAPEEKARGITINTSHVEYDTPTRHYAHVDCPGHADYVKNMITGAAQMDGAILVVAATDGPMPQTREHILLGRQVGVPYIIVFLNKCDMVDDEELLELVEMEVRELLSQYDFPGDDTPIVRGSALKALEGDAEWEAKILELAGFLDSYIPEPERAIDKPFLLPIEDVFSISGRGTVVTGRVERGIIKVGEEVEIVGIKETQKSTCTGVEMFRKLLDEGRAGENVGVLLRGIKREEIERGQVLAKPGTIKPHTKFESEVYILSKDEGGRHTPFFKGYRPQFYFRTTDVTGTIELPEGVEMVMPGDNIKMVVTLIHPIAMDDGLRFAIREGGRTV…	96.33	gnl|BL_ORD_ID|1969|hsp_num:0	2158			45	1227	pulvomycin
	1_1549 # 1689763 # 1690485 # -1 # ID=1_1549;partial=00;start_type=ATG;rbs_motif=GAG;rbs_spacer=6bp;gc_cont=0.537	1_1549	1689763	1690485	-	Strict	450	456.8	baeR	94.14	3000828	protein overexpression model	n/a	n/a	aminoglycoside antibiotic; aminocoumarin antibiotic	antibiotic efflux	resistance-nodulation-cell division (RND) antibiotic efflux pump	ATGACTGAATTACCCATTGATGAAAACACGCCGCGCATTTTGATTGTTGAAGATGAACCCAAGCTGGGTCAGCTGCTTATTGACTACTTACGCGCGGCGAGTTACGCCCCCACGCTCATCAATCACGGCGACAAGGTACTGCCGTATGTGCGTCAAACGCCGCCGGATCTGATTCTGCTGGATCTGATGCTGCCGGGTACCGATGGTCTGACGCTATGCCGGGAGATTCGCCGTTTTTCCGACATCCCCATTGTGATGGTCACAGCCAAAATTGAAGAGATCGACCGGCTGCTGGGGCTGGAAATCGGCGCCGATGATTATATCTGTAAGCCTTACAGCCCGCGCGAAGTCGTGGCCCGCGTGAAAACCATTTTGCGCCGCTGTAAACCGCAGCGCGAA…	MTELPIDENTPRILIVEDEPKLGQLLIDYLRAASYAPTLINHGDKVLPYVRQTPPDLILLDLMLPGTDGLTLCREIRRFSDIPIVMVTAKIEEIDRLLGLEIGADDYICKPYSPREVVARVKTILRRCKPQRELQQQDAESPLMIDESRFQASWCGKALDLTPAEFRLLKTLSLEPGKVFSREQLLNHLYDDYRVVTDRTIDSHIKNLRRKLESLDAEQSFIRAVYGVGYRWEADACRLV	MTELPIDENTPRILIVEDEPKLGQLLIDYLRAASYAPSLISHGDQVLPYVRQTPPDLILLDLMLPGTDGLTLCREIRRFSDVPIVMVTAKIEEIDRLLGLEIGADDYICKPYSPREVVARVKTILRRCKPQRELQVLDAESPLIVDESRFQASWRSKLLDLTPAEFRLLKTLSHEPGKVFSREQLLNHLYDDYRVVTDRTIDSHIKNLRRKLEALDAEQSFIRAVYGVGYRWEADACRIA	100	gnl|BL_ORD_ID|1382|hsp_num:0	1337			0	717	neomycin; amikacin; kanamycin A; tobramycin; novobiocin; gentamicin
	1_2150 # 2287823 # 2288257 # -1 # ID=1_2150;partial=00;start_type=TTG;rbs_motif=None;rbs_spacer=None;gc_cont=0.474	1_2150	2287823	2288257	-	Strict	210	273.5	Escherichia coli AcrAB-TolC with MarR mutations conferring resistance to ciprofloxacin and tetracycline	92.36	3003378	protein overexpression model	n/a	n/a	fluoroquinolone antibiotic; cephalosporin; glycylcycline; penam; tetracycline antibiotic; rifamycin antibiotic; phenicol antibiotic; disinfecting agents and antiseptics	antibiotic target alteration; antibiotic efflux	resistance-nodulation-cell division (RND) antibiotic efflux pump	TTGAAAAGCACCAGTGATCTGTTCAATGAAATCATTCCGCTGGGTCGCTTGATCTACATGGTAAATCAAAAAAAAGATCGCCTGTTAAATAACTATTTATCCCCGCTGGATATCACCGCAACACAGTTTAAAGTGCTTTGCTCGATACGCTGCGCGGGATGTATTACCCCGGTTGAACTTAAAAAAGTGCTGTCTGTCGATCTCGGCGCATTGACGCGAATGCTCGACCGCCTGCTGTGCAAAGGCTGGATCGAAAGACTGCCGAATCCTAATGACAAACGCGGCGTACTGGTGAAGCTAACGCCGGACGGCGCGGCAATTTGTGAGCAATGTCATCAACGACCAGGGCAAGACCTGCATCAGGAATTAACAAAAAACTTAACGGCGGACGAAGTGGCA…	LKSTSDLFNEIIPLGRLIYMVNQKKDRLLNNYLSPLDITATQFKVLCSIRCAGCITPVELKKVLSVDLGALTRMLDRLLCKGWIERLPNPNDKRGVLVKLTPDGAAICEQCHQRPGQDLHQELTKNLTADEVATLEYLLKKILP	MKSTSDLFNEIIPLGRLIHMVNQKKDRLLNEYLSPLDITAAQFKVLCSIRCAACITPVELKKVLSVDLGALTRMLDRLVCKGWVERLPNPNDKRGVLVKLTTGGAAICEQCHQLVGQDLHQELTKNLTADEVATLEYLLKKVLP	100	gnl|BL_ORD_ID|1983|hsp_num:0	431			0	432	tigecycline; ciprofloxacin; tetracycline; rifampin; chloramphenicol; ampicillin; cefalotin; triclosan
	1_4000 # 4243160 # 4243618 # -1 # ID=1_4000;partial=00;start_type=ATG;rbs_motif=AGG;rbs_spacer=11bp;gc_cont=0.549	1_4000	4243160	4243618	-	Strict	300	300.4	Escherichia coli soxR with mutation conferring antibiotic resistance	96.05	3003381	protein overexpression model	n/a	n/a	fluoroquinolone antibiotic; cephalosporin; glycylcycline; penam; tetracycline antibiotic; rifamycin antibiotic; phenicol antibiotic; disinfecting agents and antiseptics	antibiotic target alteration; antibiotic efflux	ATP-binding cassette (ABC) antibiotic efflux pump; major facilitator superfamily (MFS) antibiotic efflux pump; resistance-nodulation-cell division (RND) antibiotic efflux pump	ATGGAAAAAAAATCTCCCCGTTTAAAAGCCTTACTGACGCCGGGGGAAGTTGCGAAACGTAGCGGTGTTGCTGTGTCCGCCCTGCACTTCTATGAAAGCAAAGGGCTAATTACCAGTATCCGTAATAGCGGTAACCAACGGCGATACAAGCGTGACGTGTTGCGTTATGTCGCGATTATCAAGATCGCCCAGCGTATCGGCATCCCGCTGGCAACTATCGGCGACGCGTTTGGTATCTTGCCGGAAGGACATACGTTAAGCGCGAAAGAGTGGAAGCAGCTCTCCTCGCAGTGGCGCGAAGAGTTAGACCGACGTATTCATACGCTGGTGGCGTTGCGCGATGAGCTGGACGGTTGTATCGGCTGCGGCTGTTTATCGCGTAGCGACTGTCCGCTGCGA…	MEKKSPRLKALLTPGEVAKRSGVAVSALHFYESKGLITSIRNSGNQRRYKRDVLRYVAIIKIAQRIGIPLATIGDAFGILPEGHTLSAKEWKQLSSQWREELDRRIHTLVALRDELDGCIGCGCLSRSDCPLRNPGDRLGEHGTGARLLEDD	MEKKLPRIKALLTPGEVAKRSGVAVSALHFYESKGLITSIRNSGNQRRYKRDVLRYVAIIKIAQRIGIPLATIGEAFGVLPEGHTLSAKEWKQLSSQWREELDRRIHTLVALRDELDGCIGCGCLSRSDCPLRNPGDRLGEEGTGARLLEDEQN	98.7	gnl|BL_ORD_ID|1972|hsp_num:0	1005			0	456	tigecycline; ciprofloxacin; tetracycline; rifampin; chloramphenicol; ampicillin; nalidixic acid; norfloxacin; cefalotin; triclosan
	1_4001 # 4243705 # 4244028 # 1 # ID=1_4001;partial=00;start_type=ATG;rbs_motif=GAGG;rbs_spacer=7bp;gc_cont=0.515	1_4001	4243705	4244028	+	Strict	200	209.1	Escherichia coli soxS with mutation conferring antibiotic resistance	95.33	3003511	protein overexpression model	n/a	n/a	fluoroquinolone antibiotic; monobactam; carbapenem; cephalosporin; glycylcycline; cephamycin; penam; tetracycline antibiotic; rifamycin antibiotic; phenicol antibiotic; penem; disinfecting agents and antiseptics	antibiotic target alteration; antibiotic efflux; reduced permeability to antibiotic	ATP-binding cassette (ABC) antibiotic efflux pump; major facilitator superfamily (MFS) antibiotic efflux pump; resistance-nodulation-cell division (RND) antibiotic efflux pump; General Bacterial Porin with reduced permeability to beta-lactams	ATGTCGCATCAGCAGATAATTCAGACCCTTATCGAATGGATTGATGAACATATCGACCAACCGCTAAACATTGATGTGGTGGCAAAAAAATCGGGCTACTCCAAGTGGTATTTGCAGCGGATGTTTCGTACGGTAACGCATCAAACATTAGGCGAGTATATTCGCCAGCGCCGTCTCCTGTTGGCGGCCGTTGAGCTACGAACGACCGAGCGCCCGATTTTTGATATCGCGATGGACCTGGGCTATGTATCGCAGCAAACCTTCTCGCGTGTATTCCGCCGCGAGTTCGATCGCACTCCCAGCGATTACCGTCACCGCCTGTAG	MSHQQIIQTLIEWIDEHIDQPLNIDVVAKKSGYSKWYLQRMFRTVTHQTLGEYIRQRRLLLAAVELRTTERPIFDIAMDLGYVSQQTFSRVFRREFDRTPSDYRHRL	MSHQKIIQDLIAWIDEHIDQPLNIDVVAKKSGYSKWYLQRMFRTVTHQTLGDYIRQRRLLLAAVELRTTERPIFDIAMDLGYVSQQTFSRVFRRQFDRTPSDYRHRL	100	gnl|BL_ORD_ID|1974|hsp_num:0	2066			0	321	tigecycline; ciprofloxacin; tetracycline; rifampin; chloramphenicol; ampicillin; norfloxacin; cefalotin; triclosan; enrofloxacin

## Sheet: MLST
Isolate ID	Locus	Identity	Coverage	Alignment Length	Allele Length	Gaps	Allele	Sequence Type
SA607	aroC	100	100	501	501	0	aroC_5	11
	dnaN	100	100	501	501	0	dnaN_2
	hemD	100	100	432	432	0	hemD_3
	hisD	100	100	501	501	0	hisD_7
	purE	100	100	399	399	0	purE_6
	sucA	100	100	501	501	0	sucA_6
	thrA	100	100	501	501	0	thrA_11
SA608	aroC	100	100	501	501	0	aroC_5	11
	dnaN	100	100	501	501	0	dnaN_2
	hemD	100	100	432	432	0	hemD_3
	hisD	100	100	501	501	0	hisD_7
	purE	100	100	399	399	0	purE_6
	sucA	100	100	501	501	0	sucA_6
	thrA	100	100	501	501	0	thrA_11
SA615	aroC	100	100	501	501	0	aroC_5	11
	dnaN	100	100	501	501	0	dnaN_2
	hemD	100	100	432	432	0	hemD_3
	hisD	100	100	501	501	0	hisD_7
	purE	100	100	399	399	0	purE_6
	sucA	100	100	501	501	0	sucA_6
	thrA	100	100	501	501	0	thrA_11
SA616	aroC	100	100	501	501	0	aroC_5	11
	dnaN	100	100	501	501	0	dnaN_2
	hemD	100	100	432	432	0	hemD_3
	hisD	100	100	501	501	0	hisD_7
	purE	100	100	399	399	0	purE_6
	sucA	100	100	501	501	0	sucA_6
	thrA	100	100	501	501	0	thrA_11
SA617	aroC	100	100	501	501	0	aroC_5	11
	dnaN	100	100	501	501	0	dnaN_2
	hemD	100	100	432	432	0	hemD_3
	hisD	100	100	501	501	0	hisD_7
	purE	100	100	399	399	0	purE_6
	sucA	100	100	501	501	0	sucA_6
	thrA	100	100	501	501	0	thrA_11

## Sheet: PlasmidFinder
Isolate ID	Plasmid	Identity	Identity Query / Template length	Contig	Position in contig	Accession number
SA607	IncFIB(S)	99	603/643	2 length=59372 depth=1.01x circular=true	1..603	FN432031
	IncFII(S)	100	262/262	2 length=59372 depth=1.01x circular=true	15080..15341	CP000858
SA608	IncFIB(S)	99	603/643	2 length=59372 depth=0.58x circular=true	1..603	FN432031
	IncFII(S)	100	262/262	2 length=59372 depth=0.58x circular=true	15080..15341	CP000858
SA615	IncFIB(S)	99	603/643	2 length=59372 depth=0.73x circular=true	1..603	FN432031
	IncFII(S)	100	262/262	2 length=59372 depth=0.73x circular=true	15080..15341	CP000858
	IncX1	98.66	374 / 374	3 length=45040 depth=0.94x circular=true	880..1253	EU370913
SA616	IncFIB(S)	99	603/643	2 length=59372 depth=0.66x circular=true	1..603	FN432031
	IncFII(S)	100	262/262	2 length=59372 depth=0.66x circular=true	15080..15341	CP000858
	IncX1	98.66	374 / 374	3 length=45040 depth=0.91x circular=true	880..1253	EU370913
SA616	IncFIB(S)	99	603/643	2 length=59372 depth=0.90x circular=true	1..603	FN432031
	IncFII(S)	100	262/262	2 length=59372 depth=0.90x circular=true	15080..15341	CP000858
	IncX1	98.66	374 / 374	3 length=45040 depth=1.29x circular=true	880..1253	EU370913

## Sheet: MGE
Isolate ID	mge_no	name	synonyms	prediction method	type	allele_len	depth	e_value	identity	coverage	gaps	substitution	contig	start	stop	cigar
SA607	2	ISSty2		alignment to reference	Insertion sequence	1245		0	0.968229	0.98888	14	26	1 length=4717634 depth=1.00x circular=true	2837510	2838754	M459 I13 M773 I1 M13
	4	ISKpn2		alignment to reference	Insertion sequence	1294		0	0.963303	0.987749	16	32	1 length=4717634 depth=1.00x circular=true	1935250	1936543	M1136 D1 M62 I2 M1 I8 M1 I4 M7 D1 M85
	7	ISEcl10		alignment to reference	Insertion sequence	1207		0	0.932063	1	0	82	1 length=4717634 depth=1.00x circular=true	1151379	1152585	M1207
	8	ISEcl10		alignment to reference	Insertion sequence	1206		0	0.940348	0.999171	1	71	1 length=4717634 depth=1.00x circular=true	4057211	4058416	M868 I1 M338
	41	MITEEc1		alignment to reference	Miniature Inverted Repeat	123		7.636e-42	0.934959	1	0	8	1 length=4717634 depth=1.00x circular=true	1138610	1138732	M123
	42	MITEEc1		alignment to reference	Miniature Inverted Repeat	122		2.74639e-41	0.934426	0.99187	0	8	1 length=4717634 depth=1.00x circular=true	1316475	1316596	M122
	73	ISSen7		alignment to reference	Insertion sequence	1247		0	0.985565	0.996782	4	14	2 length=59372 depth=1.01x circular=true	33581	34827	M1018 D4 M225
SA608	2	ISSty2		alignment to reference	Insertion sequence	1245		0	0.968229	0.98888	14	26	1 length=4717402 depth=1.00x circular=true	2837510	2838754	M459 I13 M773 I1 M13
	4	ISKpn2		alignment to reference	Insertion sequence	1294		0	0.963303	0.987749	16	32	1 length=4717402 depth=1.00x circular=true	1935250	1936543	M1136 D1 M62 I2 M1 I8 M1 I4 M7 D1 M85
	7	ISEcl10		alignment to reference	Insertion sequence	1207		0	0.932063	1	0	82	1 length=4717402 depth=1.00x circular=true	1151379	1152585	M1207
	8	ISEcl10		alignment to reference	Insertion sequence	1206		0	0.940348	0.999171	1	71	1 length=4717402 depth=1.00x circular=true	4057211	4058416	M868 I1 M338
	41	MITEEc1		alignment to reference	Miniature Inverted Repeat	123		7.63562e-42	0.934959	1	0	8	1 length=4717402 depth=1.00x circular=true	1138610	1138732	M123
	42	MITEEc1		alignment to reference	Miniature Inverted Repeat	122		2.74626e-41	0.934426	0.99187	0	8	1 length=4717402 depth=1.00x circular=true	1316475	1316596	M122
	73	ISSen7		alignment to reference	Insertion sequence	1247		0	0.985565	0.996782	4	14	2 length=59372 depth=0.58x circular=true	33581	34827	M1018 D4 M225
SA615	1	ISKpn2		alignment to reference	Insertion sequence	1294		0	0.963303	0.987749	16	32	1 length=4685645 depth=1.00x circular=true	1903397	1904690	M1136 D1 M62 I2 M1 I8 M1 I4 M7 D1 M85
	3	ISSty2		alignment to reference	Insertion sequence	1245		0	0.965846	0.98888	14	29	1 length=4685645 depth=1.00x circular=true	2805643	2806887	M459 I13 M773 I1 M13
	7	ISEcl10		alignment to reference	Insertion sequence	1207		0	0.932063	1	0	82	1 length=4685645 depth=1.00x circular=true	1119532	1120738	M1207
	8	ISEcl10		alignment to reference	Insertion sequence	1206		0	0.940348	0.999171	1	71	1 length=4685645 depth=1.00x circular=true	4025663	4026868	M868 I1 M338
	41	MITEEc1		alignment to reference	Miniature Inverted Repeat	123		7.58422e-42	0.934959	1	0	8	1 length=4685645 depth=1.00x circular=true	1106763	1106885	M123
	42	MITEEc1		alignment to reference	Miniature Inverted Repeat	122		2.72777e-41	0.934426	0.99187	0	8	1 length=4685645 depth=1.00x circular=true	1284615	1284736	M122
	73	ISSen7		alignment to reference	Insertion sequence	1247		0	0.985565	0.996782	4	14	2 length=59372 depth=0.73x circular=true	33581	34827	M1018 D4 M225
	75	Tn2		alignment to reference	Unit transposon	4950		0	0.99798	1	0	10	3 length=45040 depth=0.94x circular=true	6872	11821	M4950
SA616	1	ISKpn2		alignment to reference	Insertion sequence	1294		0	0.963303	0.987749	16	32	1 length=4685645 depth=1.00x circular=true	1903397	1904690	M1136 D1 M62 I2 M1 I8 M1 I4 M7 D1 M85
	3	ISSty2		alignment to reference	Insertion sequence	1245		0	0.965846	0.98888	14	29	1 length=4685645 depth=1.00x circular=true	2805643	2806887	M459 I13 M773 I1 M13
	7	ISEcl10		alignment to reference	Insertion sequence	1207		0	0.932063	1	0	82	1 length=4685645 depth=1.00x circular=true	1119532	1120738	M1207
	8	ISEcl10		alignment to reference	Insertion sequence	1206		0	0.940348	0.999171	1	71	1 length=4685645 depth=1.00x circular=true	4025663	4026868	M868 I1 M338
	41	MITEEc1		alignment to reference	Miniature Inverted Repeat	123		7.58422e-42	0.934959	1	0	8	1 length=4685645 depth=1.00x circular=true	1106763	1106885	M123
	42	MITEEc1		alignment to reference	Miniature Inverted Repeat	122		2.72777e-41	0.934426	0.99187	0	8	1 length=4685645 depth=1.00x circular=true	1284615	1284736	M122
	73	ISSen7		alignment to reference	Insertion sequence	1247		0	0.985565	0.996782	4	14	2 length=59372 depth=0.66x circular=true	33581	34827	M1018 D4 M225
	75	Tn2		alignment to reference	Unit transposon	4950		0	0.99798	1	0	10	3 length=45040 depth=0.91x circular=true	6872	11821	M4950
SA617	1	ISKpn2		alignment to reference	Insertion sequence	1294		0	0.963303	0.987749	16	32	1 length=4685645 depth=1.00x circular=true	1903397	1904690	M1136 D1 M62 I2 M1 I8 M1 I4 M7 D1 M85
	3	ISSty2		alignment to reference	Insertion sequence	1245		0	0.965846	0.98888	14	29	1 length=4685645 depth=1.00x circular=true	2805643	2806887	M459 I13 M773 I1 M13
	7	ISEcl10		alignment to reference	Insertion sequence	1207		0	0.932063	1	0	82	1 length=4685645 depth=1.00x circular=true	1119532	1120738	M1207
	8	ISEcl10		alignment to reference	Insertion sequence	1206		0	0.940348	0.999171	1	71	1 length=4685645 depth=1.00x circular=true	4025663	4026868	M868 I1 M338
	41	MITEEc1		alignment to reference	Miniature Inverted Repeat	123		7.58422e-42	0.934959	1	0	8	1 length=4685645 depth=1.00x circular=true	1106763	1106885	M123
	42	MITEEc1		alignment to reference	Miniature Inverted Repeat	122		2.72777e-41	0.934426	0.99187	0	8	1 length=4685645 depth=1.00x circular=true	1284615	1284736	M122
	73	ISSen7		alignment to reference	Insertion sequence	1247		0	0.985565	0.996782	4	14	2 length=59372 depth=0.90x circular=true	33581	34827	M1018 D4 M225
	75	Tn2		alignment to reference	Unit transposon	4950		0	0.99798	1	0	10	3 length=45040 depth=1.29x circular=true	6872	11821	M4950

## Sheet: VFDB
Virulence plasmid ID	Code	virulence gene	Description	Score (bits)	E-vaule	Identities	Start position	Stop position	Length
pSEV-607	VFG000434	pefC	plasmid-encoded fimbriae usher protein PefC [Pef - Adherence]	4117	0	0.96	3940	6348	2409
	VFG000439	spvB	type III secretion system effector SpvB, ADP ribosylation activity [SpvB - Exotoxin]	3513	0	0.99	47026	48801	1776
	VFG002301	mig-5	putative carbonic anhydrase [Mig-5 - Antimicrobial activity/Competitive advantage]	1461	0	0.99	38725	39465	741
	VFG000438	spvC	type III secretion system effector SpvC, phosphothreonine lyase [TTSS-2 secreted effectors - Effector delivery system]	1431	0	0.99	49082	49807	726
	VFG000433	pefD	plasmid-encoded fimbriae chaperone protein PefD [Pef -Adherence]	1318	0	0.99	6341	7029	693
	VFG000437	spvD	Salmonella plasmid virulence: hydrophilic protein [TTSS-2 secreted effectors -Effector delivery system]	1233	0	0.98	50069	50719	651
	VFG000442	rck	resistance to complement killing [Rck - Immune modulation]	975	0	0.97	11484	12031	558
	VFG000436	pefB	plasmid-encoded fimbriae regulatory protein PefB [Pef - Adherence]	545	1e-153	0.97	2612	2914	303
	VFG000435	pefA	plasmid-encoded fimbriae major subunit PefA [Pef - Adherence]	278	6e-73	0.94	3189	3364	519
				101	8e-20	0.87	3615	3713
				54	2e-05	0.88	3452	3502
	VFG001445	AAA92657	unknown protein [TraJ - Invasion] [Escherichia coli]	163	3e-38	0.81	22968	23284	606
pSEV-608	VFG000434	pefC	plasmid-encoded fimbriae usher protein PefC [Pef - Adherence]	4117	0	0.96	3940	6348	2409
	VFG000439	spvB	type III secretion system effector SpvB, ADP ribosylation activity [SpvB - Exotoxin]	3513	0	0.99	47026	48801	1776
	VFG002301	mig-5	putative carbonic anhydrase [Mig-5 - Antimicrobial activity/Competitive advantage]	1461	0	0.99	38725	39465	741
	VFG000438	spvC	type III secretion system effector SpvC, phosphothreonine lyase [TTSS-2 secreted effectors - Effector delivery system]	1431	0	0.99	49082	49807	726
	VFG000433	pefD	plasmid-encoded fimbriae chaperone protein PefD [Pef -Adherence]	1318	0	0.99	6341	7029	693
	VFG000437	spvD	Salmonella plasmid virulence: hydrophilic protein [TTSS-2 secreted effectors -Effector delivery system]	1233	0	0.98	50069	50719	651
	VFG000442	rck	resistance to complement killing [Rck - Immune modulation]	975	0	0.97	11484	12031	558
	VFG000436	pefB	plasmid-encoded fimbriae regulatory protein PefB [Pef - Adherence]	545	1e-153	0.97	2612	2914	303
	VFG000435	pefA	plasmid-encoded fimbriae major subunit PefA [Pef - Adherence]	278	6e-73	0.94	3189	3364	519
				101	8e-20	0.87	3615	3713
				54	2e-05	0.88	3452	3502
	VFG001445	AAA92657	unknown protein [TraJ - Invasion] [Escherichia coli]	163	3e-38	0.81	22968	23284	606
pSEV-615	VFG000434	pefC	plasmid-encoded fimbriae usher protein PefC [Pef - Adherence]	4117	0	0.96	3940	6348	2409
	VFG000439	spvB	type III secretion system effector SpvB, ADP ribosylation activity [SpvB - Exotoxin]	3513	0	0.99	47026	48801	1776
	VFG002301	mig-5	putative carbonic anhydrase [Mig-5 - Antimicrobial activity/Competitive advantage]	1461	0	0.99	38725	39465	741
	VFG000438	spvC	type III secretion system effector SpvC, phosphothreonine lyase [TTSS-2 secreted effectors - Effector delivery system]	1431	0	0.99	49082	49807	726
	VFG000433	pefD	plasmid-encoded fimbriae chaperone protein PefD [Pef -Adherence]	1318	0	0.99	6341	7029	693
	VFG000437	spvD	Salmonella plasmid virulence: hydrophilic protein [TTSS-2 secreted effectors -Effector delivery system]	1233	0	0.98	50069	50719	651
	VFG000442	rck	resistance to complement killing [Rck - Immune modulation]	975	0	0.97	11484	12031	558
	VFG000436	pefB	plasmid-encoded fimbriae regulatory protein PefB [Pef - Adherence]	545	1e-153	0.97	2612	2914	303
	VFG000435	pefA	plasmid-encoded fimbriae major subunit PefA [Pef - Adherence]	278	6e-73	0.94	3189	3364	519
				101	8e-20	0.87	3615	3713
				54	2e-05	0.88	3452	3502
	VFG001445	AAA92657	unknown protein [TraJ - Invasion] [Escherichia coli]	163	3e-38	0.81	22968	23284	606
pSEV-616	VFG000434	pefC	plasmid-encoded fimbriae usher protein PefC [Pef - Adherence]	4117	0	0.96	3940	6348	2409
	VFG000439	spvB	type III secretion system effector SpvB, ADP ribosylation activity [SpvB - Exotoxin]	3513	0	0.99	47026	48801	1776
	VFG002301	mig-5	putative carbonic anhydrase [Mig-5 - Antimicrobial activity/Competitive advantage]	1461	0	0.99	38725	39465	741
	VFG000438	spvC	type III secretion system effector SpvC, phosphothreonine lyase [TTSS-2 secreted effectors - Effector delivery system]	1431	0	0.99	49082	49807	726
	VFG000433	pefD	plasmid-encoded fimbriae chaperone protein PefD [Pef -Adherence]	1318	0	0.99	6341	7029	693
	VFG000437	spvD	Salmonella plasmid virulence: hydrophilic protein [TTSS-2 secreted effectors -Effector delivery system]	1233	0	0.98	50069	50719	651
	VFG000442	rck	resistance to complement killing [Rck - Immune modulation]	975	0	0.97	11484	12031	558
	VFG000436	pefB	plasmid-encoded fimbriae regulatory protein PefB [Pef - Adherence]	545	1e-153	0.97	2612	2914	303
	VFG000435	pefA	plasmid-encoded fimbriae major subunit PefA [Pef - Adherence]	278	6e-73	0.94	3189	3364	519
				101	8e-20	0.87	3615	3713
				54	2e-05	0.88	3452	3502
	VFG001445	AAA92657	unknown protein [TraJ - Invasion] [Escherichia coli]	163	3e-38	0.81	22968	23284	606
pSEV-617	VFG000434	pefC	plasmid-encoded fimbriae usher protein PefC [Pef - Adherence]	4117	0	0.96	3940	6348	2409
	VFG000439	spvB	type III secretion system effector SpvB, ADP ribosylation activity [SpvB - Exotoxin]	3513	0	0.99	47026	48801	1776
	VFG002301	mig-5	putative carbonic anhydrase [Mig-5 - Antimicrobial activity/Competitive advantage]	1461	0	0.99	38725	39465	741
	VFG000438	spvC	type III secretion system effector SpvC, phosphothreonine lyase [TTSS-2 secreted effectors - Effector delivery system]	1431	0	0.99	49082	49807	726
	VFG000433	pefD	plasmid-encoded fimbriae chaperone protein PefD [Pef -Adherence]	1318	0	0.99	6341	7029	693
	VFG000437	spvD	Salmonella plasmid virulence: hydrophilic protein [TTSS-2 secreted effectors -Effector delivery system]	1233	0	0.98	50069	50719	651
	VFG000442	rck	resistance to complement killing [Rck - Immune modulation]	975	0	0.97	11484	12031	558
	VFG000436	pefB	plasmid-encoded fimbriae regulatory protein PefB [Pef - Adherence]	545	1e-153	0.97	2612	2914	303
	VFG000435	pefA	plasmid-encoded fimbriae major subunit PefA [Pef - Adherence]	278	6e-73	0.94	3189	3364	519
				101	8e-20	0.87	3615	3713
				54	2e-05	0.88	3452	3502
	VFG001445	AAA92657	unknown protein [TraJ - Invasion] [Escherichia coli]	163	3e-38	0.81	22968	23284	606

## Sheet: pMLST
Isolates ID	Locus	Identity	Coverage	Alignment Length	Allele Length	Gaps	Allele	pMLST profile	Sequence type
SA607	FIA						No hit found	IncF RST	[S1:A-:B22]
	FIB	100	92.2252	344	373	0	FIB_22?
	FIC						No hit found
	FII						No hit found
	FIIK						No hit found
	FIIS	100	100	215	215	0	FIIS_1
	FIIY						No hit found
SA608	FIA						No hit found	IncF RST	[S1:A-:B22]
	FIB	100	92.2252	344	373	0	FIB_22?
	FIC						No hit found
	FII						No hit found
	FIIK						No hit found
	FIIS	100	100	215	215	0	FIIS_1
	FIIY						No hit found
SA615	FIA						No hit found	IncF RST	[S1:A-:B22]
	FIB	100	92.2252	344	373	0	FIB_22?
	FIC						No hit found
	FII						No hit found
	FIIK						No hit found
	FIIS	100	100	215	215	0	FIIS_1
	FIIY						No hit found
SA616	FIA						No hit found	IncF RST	[S1:A-:B22]
	FIB	100	92.2252	344	373	0	FIB_22?
	FIC						No hit found
	FII						No hit found
	FIIK						No hit found
	FIIS	100	100	215	215	0	FIIS_1
	FIIY						No hit found
SA617	FIA						No hit found	IncF RST	[S1:A-:B22]
	FIB	100	92.2252	344	373	0	FIB_22?
	FIC						No hit found
	FII						No hit found
	FIIK						No hit found
	FIIS	100	100	215	215	0	FIIS_1
	FIIY						No hit found

## Sheet: SPI
Isolate ID	SPI	Identity	Query / Template length	Contig	Position in contig	Organism	Insertion Site	Accession number
SA607	C63PI	99.12	4000 / 4000	1 length=4717634 depth=1.00x circular=true	1056823..1060822	Salmonella-enterica-Typhimurium-SL1344	fhlA	AF128999
	CS54_island	98.07	19752 / 25252	1 length=4717634 depth=1.00x circular=true	1300156..1319896	Salmonella-enterica-Typhimurium-ATCC_14028	xseA-yfgK	AF140550
	Not_named	100	330 / 330	1 length=4717634 depth=1.00x circular=true	2205062..2205391	Salmonella-enterica-Enteritidis-CMCC50041	-	JQ071613
	SPI-1	99.7	2705 / 2705	1 length=4717634 depth=1.00x circular=true	1053543..1056247	Salmonella-enterica-Typhimurium-SL1344	fhlA/mutS	AF148689
	SPI-1	99.77	439 / 440	1 length=4717634 depth=1.00x circular=true	1050454..1050892	Salmonella-enterica-Gallinarum-SGB_1	Not_published	AY956822
	SPI-1	99.77	430 / 430	1 length=4717634 depth=1.00x circular=true	1048354..1048783	Salmonella-enterica-Gallinarum-SGE_2	Not_published	AY956823
	SPI-1	100	470 / 470	1 length=4717634 depth=1.00x circular=true	1039605..1040074	Salmonella-enterica-Gallinarum-SGB_4	Not_published	AY956824
	SPI-1	100	415 / 415	1 length=4717634 depth=1.00x circular=true	1027873..1028287	Salmonella-enterica-Gallinarum-SGB_8	Not_published	AY956825
	SPI-1	98.07	259 / 257	1 length=4717634 depth=1.00x circular=true	1026735..1026993	Salmonella-enterica-Typhimurium-J4STEHO	-	JN982040
	SPI-1	98.48	3155 / 3141	1 length=4717634 depth=1.00x circular=true	1013902..1017054	Salmonella-enterica-Typhimurium-SL1344	fhlA/mutS	U16303
	SPI-10	99.28	553 / 554	1 length=4717634 depth=1.00x circular=true	4062371..4062923	Salmonella-enterica-Gallinarium-SGE_3	Not_published	AY956839
	SPI-12	97.94	9343 / 11075	1 length=4717634 depth=1.00x circular=true	1605992..1615330	Salmonella-enterica-Choleraesuis-SC_B67	tRNA-pro	NC_006905
	SPI-13	99.41	338 / 338	1 length=4717634 depth=1.00x circular=true	783688..784025	Salmonella-enterica-Gallinarum-SGD_3	tRNA-pheV	AY956832
	SPI-13	100	341 / 341	1 length=4717634 depth=1.00x circular=true	786104..786444	Salmonella-enterica-Gallinarum-SGA_10	tRNA-pheV	AY956834
	SPI-14	99.8	501 / 501	1 length=4717634 depth=1.00x circular=true	3065366..3065866	Salmonella-enterica-Gallinarum-SGA_8	Not_published	AY956835
	SPI-14	99.55	441 / 441	1 length=4717634 depth=1.00x circular=true	3059845..3060285	Salmonella-enterica-Gallinarum-SGC_8	Not_published	AY956836
	SPI-2	99.37	637 / 637	1 length=4717634 depth=1.00x circular=true	2219274..2219910	Salmonella-enterica-Gallinarum-SGB_10	tRNA-valV	AY956826
	SPI-2	100	642 / 642	1 length=4717634 depth=1.00x circular=true	2211964..2212605	Salmonella-enterica-Gallinarum-SGC_2	tRNA-valV	AY956827
	SPI-2	100	395 / 396	1 length=4717634 depth=1.00x circular=true	2216597..2216991	Salmonella-enterica-Gallinarum-SGC_9	tRNA-valV	AY956828
	SPI-2	100	425 / 425	1 length=4717634 depth=1.00x circular=true	2209939..2210363	Salmonella-enterica-Gallinarum-SGH_1	tRNA-valV	AY956829
	SPI-2	98.9	547 / 547	1 length=4717634 depth=1.00x circular=true	2199863..2200409	Salmonella-enterica-Gallinarum-SGD_8	tRNA-valV	AY956830
	SPI-2	100	384 / 384	1 length=4717634 depth=1.00x circular=true	2202324..2202707	Salmonella-enterica-Enteritidis-Se11	-	JN673270
	SPI-2	100	384 / 384	1 length=4717634 depth=1.00x circular=true	2202324..2202707	Salmonella-enterica-Enteritidis-C50041	-	JN673273
	SPI-2	99.05	4633 / 4631	1 length=4717634 depth=1.00x circular=true	2181909..2186536	Salmonella-enterica-Typhimurium-LT2	tRNA-valV	X99945
	SPI-2	99.2	1252 / 1252	1 length=4717634 depth=1.00x circular=true	2198283..2199534	Salmonella-enterica-Typhimurium-	tRNA-valV	Z95891
	SPI-3	99.05	738 / 738	1 length=4717634 depth=1.00x circular=true	73032..73769	Salmonella-enterica-Typhimurium-14028s	tRNA_selC	AJ000509
	SPI-3	98.94	1514 / 1514	1 length=4717634 depth=1.00x circular=true	89728..91241	Salmonella-enterica-Typhimurium-14028s	tRNA_selC	Y13864
	SPI-4	98.89	26700 / 26698	1 length=4717634 depth=1.00x circular=true	4275810..4302508	Salmonella-enterica-Choleraesuis-SC_B67	ssb-soxSR	NC_006905
	SPI-5	99.08	9069 / 9069	1 length=4717634 depth=1.00x circular=true	2889245..2898309	Salmonella-Typhimurium-LT2	tRNA-serT	NC_003197
	SPI-9	98.56	12647 / 15696	1 length=4717634 depth=1.00x circular=true	1155692..1168338	Salmonella-Typhi-CT18	Not_published	NC_003198
SA608	C63PI	99.12	4000 / 4000	1 length=4717402 depth=1.00x circular=true	1056823..1060822	Salmonella-enterica-Typhimurium-SL1344	fhlA	AF128999
	CS54_island	98.07	19752 / 25252	1 length=4717402 depth=1.00x circular=true	1300156..1319896	Salmonella-enterica-Typhimurium-ATCC_14028	xseA-yfgK	AF140550
	Not_named	100	330 / 330	1 length=4717402 depth=1.00x circular=true	2205062..2205391	Salmonella-enterica-Enteritidis-CMCC50041	-	JQ071613
	SPI-1	99.67	2705 / 2705	1 length=4717402 depth=1.00x circular=true	1053543..1056247	Salmonella-enterica-Typhimurium-SL1344	fhlA/mutS	AF148689
	SPI-1	99.77	439 / 440	1 length=4717402 depth=1.00x circular=true	1050454..1050892	Salmonella-enterica-Gallinarum-SGB_1	Not_published	AY956822
	SPI-1	99.77	430 / 430	1 length=4717402 depth=1.00x circular=true	1048354..1048783	Salmonella-enterica-Gallinarum-SGE_2	Not_published	AY956823
	SPI-1	100	470 / 470	1 length=4717402 depth=1.00x circular=true	1039605..1040074	Salmonella-enterica-Gallinarum-SGB_4	Not_published	AY956824
	SPI-1	100	415 / 415	1 length=4717402 depth=1.00x circular=true	1027873..1028287	Salmonella-enterica-Gallinarum-SGB_8	Not_published	AY956825
	SPI-1	98.07	259 / 257	1 length=4717402 depth=1.00x circular=true	1026735..1026993	Salmonella-enterica-Typhimurium-J4STEHO	-	JN982040
	SPI-1	98.48	3155 / 3141	1 length=4717402 depth=1.00x circular=true	1013902..1017054	Salmonella-enterica-Typhimurium-SL1344	fhlA/mutS	U16303
	SPI-10	99.28	553 / 554	1 length=4717402 depth=1.00x circular=true	4062371..4062923	Salmonella-enterica-Gallinarium-SGE_3	Not_published	AY956839
	SPI-12	97.94	9343 / 11075	1 length=4717402 depth=1.00x circular=true	1605992..1615330	Salmonella-enterica-Choleraesuis-SC_B67	tRNA-pro	NC_006905
	SPI-13	99.41	338 / 338	1 length=4717402 depth=1.00x circular=true	783688..784025	Salmonella-enterica-Gallinarum-SGD_3	tRNA-pheV	AY956832
	SPI-13	100	341 / 341	1 length=4717402 depth=1.00x circular=true	786104..786444	Salmonella-enterica-Gallinarum-SGA_10	tRNA-pheV	AY956834
	SPI-14	99.8	501 / 501	1 length=4717402 depth=1.00x circular=true	3065366..3065866	Salmonella-enterica-Gallinarum-SGA_8	Not_published	AY956835
	SPI-14	99.55	441 / 441	1 length=4717402 depth=1.00x circular=true	3059845..3060285	Salmonella-enterica-Gallinarum-SGC_8	Not_published	AY956836
	SPI-2	99.37	637 / 637	1 length=4717402 depth=1.00x circular=true	2219274..2219910	Salmonella-enterica-Gallinarum-SGB_10	tRNA-valV	AY956826
	SPI-2	100	642 / 642	1 length=4717402 depth=1.00x circular=true	2211964..2212605	Salmonella-enterica-Gallinarum-SGC_2	tRNA-valV	AY956827
	SPI-2	100	395 / 396	1 length=4717402 depth=1.00x circular=true	2216597..2216991	Salmonella-enterica-Gallinarum-SGC_9	tRNA-valV	AY956828
	SPI-2	100	425 / 425	1 length=4717402 depth=1.00x circular=true	2209939..2210363	Salmonella-enterica-Gallinarum-SGH_1	tRNA-valV	AY956829
	SPI-2	98.9	547 / 547	1 length=4717402 depth=1.00x circular=true	2199863..2200409	Salmonella-enterica-Gallinarum-SGD_8	tRNA-valV	AY956830
	SPI-2	100	384 / 384	1 length=4717402 depth=1.00x circular=true	2202324..2202707	Salmonella-enterica-Enteritidis-Se11	-	JN673270
	SPI-2	100	384 / 384	1 length=4717402 depth=1.00x circular=true	2202324..2202707	Salmonella-enterica-Enteritidis-C50041	-	JN673273
	SPI-2	99.05	4633 / 4631	1 length=4717402 depth=1.00x circular=true	2181909..2186536	Salmonella-enterica-Typhimurium-LT2	tRNA-valV	X99945
	SPI-2	99.2	1252 / 1252	1 length=4717402 depth=1.00x circular=true	2198283..2199534	Salmonella-enterica-Typhimurium-	tRNA-valV	Z95891
	SPI-3	99.05	738 / 738	1 length=4717402 depth=1.00x circular=true	73032..73769	Salmonella-enterica-Typhimurium-14028s	tRNA_selC	AJ000509
	SPI-3	98.94	1514 / 1514	1 length=4717402 depth=1.00x circular=true	89728..91241	Salmonella-enterica-Typhimurium-14028s	tRNA_selC	Y13864
	SPI-4	98.89	26700 / 26698	1 length=4717402 depth=1.00x circular=true	4275578..4302276	Salmonella-enterica-Choleraesuis-SC_B67	ssb-soxSR	NC_006905
	SPI-5	99.08	9069 / 9069	1 length=4717402 depth=1.00x circular=true	2889245..2898309	Salmonella-Typhimurium-LT2	tRNA-serT	NC_003197
	SPI-9	98.56	12647 / 15696	1 length=4717402 depth=1.00x circular=true	1155692..1168338	Salmonella-Typhi-CT18	Not_published	NC_003198
SA615	C63PI	99.12	4000 / 4000	1 length=4685645 depth=1.00x circular=true	1024976..1028975	Salmonella-enterica-Typhimurium-SL1344	fhlA	AF128999
	CS54_island	98.07	19752 / 25252	1 length=4685645 depth=1.00x circular=true	1268296..1288036	Salmonella-enterica-Typhimurium-ATCC_14028	xseA-yfgK	AF140550
	Not_named	100	330 / 330	1 length=4685645 depth=1.00x circular=true	2173198..2173527	Salmonella-enterica-Enteritidis-CMCC50041	-	JQ071613
	SPI-1	99.7	2705 / 2705	1 length=4685645 depth=1.00x circular=true	1021696..1024400	Salmonella-enterica-Typhimurium-SL1344	fhlA/mutS	AF148689
	SPI-1	99.77	439 / 440	1 length=4685645 depth=1.00x circular=true	1018607..1019045	Salmonella-enterica-Gallinarum-SGB_1	Not_published	AY956822
	SPI-1	99.77	430 / 430	1 length=4685645 depth=1.00x circular=true	1016507..1016936	Salmonella-enterica-Gallinarum-SGE_2	Not_published	AY956823
	SPI-1	100	470 / 470	1 length=4685645 depth=1.00x circular=true	1007758..1008227	Salmonella-enterica-Gallinarum-SGB_4	Not_published	AY956824
	SPI-1	100	415 / 415	1 length=4685645 depth=1.00x circular=true	996026..996440	Salmonella-enterica-Gallinarum-SGB_8	Not_published	AY956825
	SPI-1	98.07	259 / 257	1 length=4685645 depth=1.00x circular=true	994888..995146	Salmonella-enterica-Typhimurium-J4STEHO	-	JN982040
	SPI-1	98.48	3155 / 3141	1 length=4685645 depth=1.00x circular=true	982055..985207	Salmonella-enterica-Typhimurium-SL1344	fhlA/mutS	U16303
	SPI-10	99.28	553 / 554	1 length=4685645 depth=1.00x circular=true	4030823..4031375	Salmonella-enterica-Gallinarium-SGE_3	Not_published	AY956839
	SPI-12	97.93	9343 / 11075	1 length=4685645 depth=1.00x circular=true	1574139..1583477	Salmonella-enterica-Choleraesuis-SC_B67	tRNA-pro	NC_006905
	SPI-13	99.41	338 / 338	1 length=4685645 depth=1.00x circular=true	751829..752166	Salmonella-enterica-Gallinarum-SGD_3	tRNA-pheV	AY956832
	SPI-13	100	341 / 341	1 length=4685645 depth=1.00x circular=true	754245..754585	Salmonella-enterica-Gallinarum-SGA_10	tRNA-pheV	AY956834
	SPI-14	99.8	501 / 501	1 length=4685645 depth=1.00x circular=true	3033499..3033999	Salmonella-enterica-Gallinarum-SGA_8	Not_published	AY956835
	SPI-14	99.55	441 / 441	1 length=4685645 depth=1.00x circular=true	3027978..3028418	Salmonella-enterica-Gallinarum-SGC_8	Not_published	AY956836
	SPI-2	99.37	637 / 637	1 length=4685645 depth=1.00x circular=true	2187410..2188046	Salmonella-enterica-Gallinarum-SGB_10	tRNA-valV	AY956826
	SPI-2	100	642 / 642	1 length=4685645 depth=1.00x circular=true	2180100..2180741	Salmonella-enterica-Gallinarum-SGC_2	tRNA-valV	AY956827
	SPI-2	100	395 / 396	1 length=4685645 depth=1.00x circular=true	2184733..2185127	Salmonella-enterica-Gallinarum-SGC_9	tRNA-valV	AY956828
	SPI-2	100	425 / 425	1 length=4685645 depth=1.00x circular=true	2178075..2178499	Salmonella-enterica-Gallinarum-SGH_1	tRNA-valV	AY956829
	SPI-2	98.9	547 / 547	1 length=4685645 depth=1.00x circular=true	2167999..2168545	Salmonella-enterica-Gallinarum-SGD_8	tRNA-valV	AY956830
	SPI-2	100	384 / 384	1 length=4685645 depth=1.00x circular=true	2170460..2170843	Salmonella-enterica-Enteritidis-Se11	-	JN673270
	SPI-2	100	384 / 384	1 length=4685645 depth=1.00x circular=true	2170460..2170843	Salmonella-enterica-Enteritidis-C50041	-	JN673273
	SPI-2	99.05	4633 / 4631	1 length=4685645 depth=1.00x circular=true	2150045..2154672	Salmonella-enterica-Typhimurium-LT2	tRNA-valV	X99945
	SPI-2	99.2	1252 / 1252	1 length=4685645 depth=1.00x circular=true	2166419..2167670	Salmonella-enterica-Typhimurium-	tRNA-valV	Z95891
	SPI-3	99.05	738 / 738	1 length=4685645 depth=1.00x circular=true	73032..73769	Salmonella-enterica-Typhimurium-14028s	tRNA_selC	AJ000509
	SPI-3	98.94	1514 / 1514	1 length=4685645 depth=1.00x circular=true	89728..91241	Salmonella-enterica-Typhimurium-14028s	tRNA_selC	Y13864
	SPI-4	98.89	26700 / 26698	1 length=4685645 depth=1.00x circular=true	4244016..4270714	Salmonella-enterica-Choleraesuis-SC_B67	ssb-soxSR	NC_006905
	SPI-5	99.08	9069 / 9069	1 length=4685645 depth=1.00x circular=true	2857378..2866442	Salmonella-Typhimurium-LT2	tRNA-serT	NC_003197
	SPI-9	98.56	12647 / 15696	1 length=4685645 depth=1.00x circular=true	1123845..1136491	Salmonella-Typhi-CT18	Not_published	NC_003198
SA616	C63PI	99.12	4000 / 4000	1 length=4685645 depth=1.00x circular=true	1024976..1028975	Salmonella-enterica-Typhimurium-SL1344	fhlA	AF128999
	CS54_island	98.07	19752 / 25252	1 length=4685645 depth=1.00x circular=true	1268296..1288036	Salmonella-enterica-Typhimurium-ATCC_14028	xseA-yfgK	AF140550
	Not_named	100	330 / 330	1 length=4685645 depth=1.00x circular=true	2173198..2173527	Salmonella-enterica-Enteritidis-CMCC50041	-	JQ071613
	SPI-1	99.7	2705 / 2705	1 length=4685645 depth=1.00x circular=true	1021696..1024400	Salmonella-enterica-Typhimurium-SL1344	fhlA/mutS	AF148689
	SPI-1	99.77	439 / 440	1 length=4685645 depth=1.00x circular=true	1018607..1019045	Salmonella-enterica-Gallinarum-SGB_1	Not_published	AY956822
	SPI-1	99.77	430 / 430	1 length=4685645 depth=1.00x circular=true	1016507..1016936	Salmonella-enterica-Gallinarum-SGE_2	Not_published	AY956823
	SPI-1	100	470 / 470	1 length=4685645 depth=1.00x circular=true	1007758..1008227	Salmonella-enterica-Gallinarum-SGB_4	Not_published	AY956824
	SPI-1	100	415 / 415	1 length=4685645 depth=1.00x circular=true	996026..996440	Salmonella-enterica-Gallinarum-SGB_8	Not_published	AY956825
	SPI-1	98.07	259 / 257	1 length=4685645 depth=1.00x circular=true	994888..995146	Salmonella-enterica-Typhimurium-J4STEHO	-	JN982040
	SPI-1	98.48	3155 / 3141	1 length=4685645 depth=1.00x circular=true	982055..985207	Salmonella-enterica-Typhimurium-SL1344	fhlA/mutS	U16303
	SPI-10	99.28	553 / 554	1 length=4685645 depth=1.00x circular=true	4030823..4031375	Salmonella-enterica-Gallinarium-SGE_3	Not_published	AY956839
	SPI-12	97.93	9343 / 11075	1 length=4685645 depth=1.00x circular=true	1574139..1583477	Salmonella-enterica-Choleraesuis-SC_B67	tRNA-pro	NC_006905
	SPI-13	99.41	338 / 338	1 length=4685645 depth=1.00x circular=true	751829..752166	Salmonella-enterica-Gallinarum-SGD_3	tRNA-pheV	AY956832
	SPI-13	100	341 / 341	1 length=4685645 depth=1.00x circular=true	754245..754585	Salmonella-enterica-Gallinarum-SGA_10	tRNA-pheV	AY956834
	SPI-14	99.8	501 / 501	1 length=4685645 depth=1.00x circular=true	3033499..3033999	Salmonella-enterica-Gallinarum-SGA_8	Not_published	AY956835
	SPI-14	99.55	441 / 441	1 length=4685645 depth=1.00x circular=true	3027978..3028418	Salmonella-enterica-Gallinarum-SGC_8	Not_published	AY956836
	SPI-2	99.37	637 / 637	1 length=4685645 depth=1.00x circular=true	2187410..2188046	Salmonella-enterica-Gallinarum-SGB_10	tRNA-valV	AY956826
	SPI-2	100	642 / 642	1 length=4685645 depth=1.00x circular=true	2180100..2180741	Salmonella-enterica-Gallinarum-SGC_2	tRNA-valV	AY956827
	SPI-2	100	395 / 396	1 length=4685645 depth=1.00x circular=true	2184733..2185127	Salmonella-enterica-Gallinarum-SGC_9	tRNA-valV	AY956828
	SPI-2	100	425 / 425	1 length=4685645 depth=1.00x circular=true	2178075..2178499	Salmonella-enterica-Gallinarum-SGH_1	tRNA-valV	AY956829
	SPI-2	98.9	547 / 547	1 length=4685645 depth=1.00x circular=true	2167999..2168545	Salmonella-enterica-Gallinarum-SGD_8	tRNA-valV	AY956830
	SPI-2	100	384 / 384	1 length=4685645 depth=1.00x circular=true	2170460..2170843	Salmonella-enterica-Enteritidis-Se11	-	JN673270
	SPI-2	100	384 / 384	1 length=4685645 depth=1.00x circular=true	2170460..2170843	Salmonella-enterica-Enteritidis-C50041	-	JN673273
	SPI-2	99.05	4633 / 4631	1 length=4685645 depth=1.00x circular=true	2150045..2154672	Salmonella-enterica-Typhimurium-LT2	tRNA-valV	X99945
	SPI-2	99.2	1252 / 1252	1 length=4685645 depth=1.00x circular=true	2166419..2167670	Salmonella-enterica-Typhimurium-	tRNA-valV	Z95891
	SPI-3	99.05	738 / 738	1 length=4685645 depth=1.00x circular=true	73032..73769	Salmonella-enterica-Typhimurium-14028s	tRNA_selC	AJ000509
	SPI-3	98.94	1514 / 1514	1 length=4685645 depth=1.00x circular=true	89728..91241	Salmonella-enterica-Typhimurium-14028s	tRNA_selC	Y13864
	SPI-4	98.89	26700 / 26698	1 length=4685645 depth=1.00x circular=true	4244016..4270714	Salmonella-enterica-Choleraesuis-SC_B67	ssb-soxSR	NC_006905
	SPI-5	99.08	9069 / 9069	1 length=4685645 depth=1.00x circular=true	2857378..2866442	Salmonella-Typhimurium-LT2	tRNA-serT	NC_003197
	SPI-9	98.56	12647 / 15696	1 length=4685645 depth=1.00x circular=true	1123845..1136491	Salmonella-Typhi-CT18	Not_published	NC_003198
SA617	C63PI	99.12	4000 / 4000	1 length=4685645 depth=1.00x circular=true	1024976..1028975	Salmonella-enterica-Typhimurium-SL1344	fhlA	AF128999
	CS54_island	98.07	19752 / 25252	1 length=4685645 depth=1.00x circular=true	1268296..1288036	Salmonella-enterica-Typhimurium-ATCC_14028	xseA-yfgK	AF140550
	Not_named	100	330 / 330	1 length=4685645 depth=1.00x circular=true	2173198..2173527	Salmonella-enterica-Enteritidis-CMCC50041	-	JQ071613
	SPI-1	99.7	2705 / 2705	1 length=4685645 depth=1.00x circular=true	1021696..1024400	Salmonella-enterica-Typhimurium-SL1344	fhlA/mutS	AF148689
	SPI-1	99.77	439 / 440	1 length=4685645 depth=1.00x circular=true	1018607..1019045	Salmonella-enterica-Gallinarum-SGB_1	Not_published	AY956822
	SPI-1	99.77	430 / 430	1 length=4685645 depth=1.00x circular=true	1016507..1016936	Salmonella-enterica-Gallinarum-SGE_2	Not_published	AY956823
	SPI-1	100	470 / 470	1 length=4685645 depth=1.00x circular=true	1007758..1008227	Salmonella-enterica-Gallinarum-SGB_4	Not_published	AY956824
	SPI-1	100	415 / 415	1 length=4685645 depth=1.00x circular=true	996026..996440	Salmonella-enterica-Gallinarum-SGB_8	Not_published	AY956825
	SPI-1	98.07	259 / 257	1 length=4685645 depth=1.00x circular=true	994888..995146	Salmonella-enterica-Typhimurium-J4STEHO	-	JN982040
	SPI-1	98.48	3155 / 3141	1 length=4685645 depth=1.00x circular=true	982055..985207	Salmonella-enterica-Typhimurium-SL1344	fhlA/mutS	U16303
	SPI-10	99.28	553 / 554	1 length=4685645 depth=1.00x circular=true	4030823..4031375	Salmonella-enterica-Gallinarium-SGE_3	Not_published	AY956839
	SPI-12	97.93	9343 / 11075	1 length=4685645 depth=1.00x circular=true	1574139..1583477	Salmonella-enterica-Choleraesuis-SC_B67	tRNA-pro	NC_006905
	SPI-13	99.41	338 / 338	1 length=4685645 depth=1.00x circular=true	751829..752166	Salmonella-enterica-Gallinarum-SGD_3	tRNA-pheV	AY956832
	SPI-13	100	341 / 341	1 length=4685645 depth=1.00x circular=true	754245..754585	Salmonella-enterica-Gallinarum-SGA_10	tRNA-pheV	AY956834
	SPI-14	99.8	501 / 501	1 length=4685645 depth=1.00x circular=true	3033499..3033999	Salmonella-enterica-Gallinarum-SGA_8	Not_published	AY956835
	SPI-14	99.55	441 / 441	1 length=4685645 depth=1.00x circular=true	3027978..3028418	Salmonella-enterica-Gallinarum-SGC_8	Not_published	AY956836
	SPI-2	99.37	637 / 637	1 length=4685645 depth=1.00x circular=true	2187410..2188046	Salmonella-enterica-Gallinarum-SGB_10	tRNA-valV	AY956826
	SPI-2	100	642 / 642	1 length=4685645 depth=1.00x circular=true	2180100..2180741	Salmonella-enterica-Gallinarum-SGC_2	tRNA-valV	AY956827
	SPI-2	100	395 / 396	1 length=4685645 depth=1.00x circular=true	2184733..2185127	Salmonella-enterica-Gallinarum-SGC_9	tRNA-valV	AY956828
	SPI-2	100	425 / 425	1 length=4685645 depth=1.00x circular=true	2178075..2178499	Salmonella-enterica-Gallinarum-SGH_1	tRNA-valV	AY956829
	SPI-2	98.9	547 / 547	1 length=4685645 depth=1.00x circular=true	2167999..2168545	Salmonella-enterica-Gallinarum-SGD_8	tRNA-valV	AY956830
	SPI-2	100	384 / 384	1 length=4685645 depth=1.00x circular=true	2170460..2170843	Salmonella-enterica-Enteritidis-Se11	-	JN673270
	SPI-2	100	384 / 384	1 length=4685645 depth=1.00x circular=true	2170460..2170843	Salmonella-enterica-Enteritidis-C50041	-	JN673273
	SPI-2	99.05	4633 / 4631	1 length=4685645 depth=1.00x circular=true	2150045..2154672	Salmonella-enterica-Typhimurium-LT2	tRNA-valV	X99945
	SPI-2	99.2	1252 / 1252	1 length=4685645 depth=1.00x circular=true	2166419..2167670	Salmonella-enterica-Typhimurium-	tRNA-valV	Z95891
	SPI-3	99.05	738 / 738	1 length=4685645 depth=1.00x circular=true	73032..73769	Salmonella-enterica-Typhimurium-14028s	tRNA_selC	AJ000509
	SPI-3	98.94	1514 / 1514	1 length=4685645 depth=1.00x circular=true	89728..91241	Salmonella-enterica-Typhimurium-14028s	tRNA_selC	Y13864
	SPI-4	98.89	26700 / 26698	1 length=4685645 depth=1.00x circular=true	4244016..4270714	Salmonella-enterica-Choleraesuis-SC_B67	ssb-soxSR	NC_006905
	SPI-5	99.08	9069 / 9069	1 length=4685645 depth=1.00x circular=true	2857378..2866442	Salmonella-Typhimurium-LT2	tRNA-serT	NC_003197
	SPI-9	98.56	12647 / 15696	1 length=4685645 depth=1.00x circular=true	1123845..1136491	Salmonella-Typhi-CT18	Not_published	NC_003198
